# Supplementary material for: Cyanation and cyanomethylation of trimethylammonium salts via electrochemical cleavage of C–N bonds
Source: Royal Society of Chemistry journal article supplement (doi:10.1039/d1qo01858b), 2022-01-01
Supplement: d1qo01858b1.pdf [file d1qo01858b1.pdf]

# Supporting Information

## Cyanation and Cyanomethylation of Aryltrimethylammonium Salts via Electrochemical Cleavage of C–N Bonds

Xianqiang Kong, †‡ Yuchang Wang, † Yiyi Chen, † Xiaohui Chen, † Long Lin, ‡ and Zhong-Yan Cao<sup>§\*</sup>

† School of Chemical Engineering and Materials, Changzhou Institute of Technology, No. 666 Liaohe Road, Changzhou 213032, China.

‡ College of Chemistry, Chemical Engineering and Biotechnology, Donghua University, 2999 North Renmin Lu, Shanghai 201620, China.

§ College of Chemistry and Chemical Engineering, Henan University, Kaifeng 475004, China.

## Table of Contents

|                                                                           |      |
|---------------------------------------------------------------------------|------|
| Supporting information.....                                               | S1   |
| 1. General.....                                                           | S3   |
| 2. General Procedure for Preparation of Ammonium Triflates <b>1</b> ..... | S3   |
| 3. Optimization of Reaction Conditions.....                               | S4   |
| 4. General Procedure for the Cyanation and Cyanomethylation.....          | S6   |
| 5. One-pot-two-step Reaction. ....                                        | S21  |
| 6. Cyclic Voltammetry. ....                                               | S22  |
| 7. Copies of NMR spectra.....                                             | S23  |
| 8. References.....                                                        | S148 |

## 1. General

Commercial reagents and solvents were obtained from the commercial providers and used without further purification. The products were purified using a commercial flash chromatography system or a regular glass column. TLC was developed on silica gel 60 F254 glassplates.  $^1\text{H}$  NMR (500 MHz),  $^{13}\text{C}$  NMR (126 MHz) and  $^{19}\text{F}$  NMR (471 MHz) spectra were recorded on a Bruker NMR apparatus. The chemical shifts are reported in  $\delta$  (ppm) values ( $^1\text{H}$  and  $^{13}\text{C}$  NMR relative to  $\text{CHCl}_3$ ,  $\delta$  7.26 ppm for  $^1\text{H}$  NMR and  $\delta$  77.0 ppm for  $^{13}\text{C}$  NMR). Or alternatively,  $^1\text{H}$  NMR chemical shifts were referenced to tetramethylsilane signal (0 ppm). Multiplicities are recorded by s (singlet), d (doublet), t (triplet), q (quartet), p (pentet), h (hextet), m (multiplet) and br (broad). Coupling constants ( $J$ ), are reported in Hertz (Hz). Commercial reagents were used without any further purification.

## 2. General Procedure for Preparation of Ammonium Triflates 1

Ammonium Triflates **1** were prepared according to reported synthetic procedures.<sup>[1]</sup>

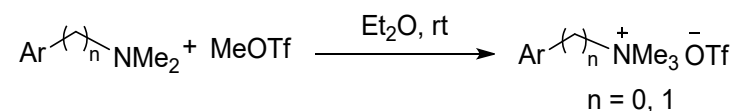

Dimethylamine (5 mmol, 1.0 equiv) was dissolved in  $\text{Et}_2\text{O}$  (10 mL). MeOTf (6.5 mmol, 1.3 equiv) was added dropwise at 0 °C. After complete addition, the reaction mixture was stirred for an additional 15–60 min at 0 °C. The solution was concentrated and washed with  $\text{Et}_2\text{O}$  ( $2 \times 20$  mL). The resulting compounds were dried under vacuum to give a salt.

### 3. Optimization of Reaction Conditions

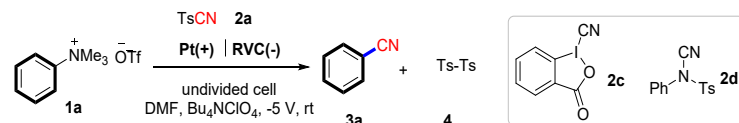

| Entry | Variation from standard conditions <sup>a</sup>                     | Yield of <b>2a</b> (%) <sup>b</sup> |
|-------|---------------------------------------------------------------------|-------------------------------------|
| 1     | none                                                                | 78/71                               |
| 2     | I instead of OTf                                                    | Trace/Trace                         |
| 3     | Cl instead of OTf                                                   | 12/8                                |
| 4     | Br instead of OTf                                                   | Trace/Trace                         |
| 5     | $\text{Et}_3\text{N}$ as additive                                   | 63/58                               |
| 6     | Acetone instead of DMF                                              | 12/8                                |
| 7     | DCE instead of DMF                                                  | NR                                  |
| 8     | 1:1 DMF/MeOH instead of DMF                                         | 15/12                               |
| 9     | $\text{CH}_3\text{CN}$ instead of DMF                               | NR                                  |
| 10    | DMSO instead of DMF                                                 | 23/18                               |
| 11    | $I = 10\text{ mA/cm}^2$ (constant current)                          | 43/36                               |
| 12    | $-4.5\text{ V}$ instead of $-5\text{ V}$                            | 69/62                               |
| 13    | $-5.3\text{ V}$ instead of $-5\text{ V}$                            | 52/47                               |
| 14    | No $n\text{-Bu}_4\text{NClO}_4$                                     | 9/ Trace                            |
| 15    | $n\text{-Bu}_4\text{NPF}_6$ instead of $n\text{-Bu}_4\text{NClO}_4$ | NR                                  |
| 16    | $\text{Et}_4\text{NOTs}$ instead of $n\text{-Bu}_4\text{NClO}_4$    | NR                                  |
| 17    | $\text{LiClO}_4$ instead of $n\text{-Bu}_4\text{NClO}_4$            | NR                                  |
| 18    | Pt (+) C (-) instead of Pt (+) RVC (-)                              | 58/52                               |
| 19    | Pt (+) Pt (-) instead of Pt (+) RVC (-)                             | NR                                  |
| 20    | C (+) Pt (-) instead of Pt (+) RVC (-)                              | NR                                  |
| 21    | RVC (+) RVC (-) instead of Pt (+) RVC (-)                           | 61/59                               |
| 22    | RVC (+) Pt (-) instead of Pt (+) RVC (-)                            | NR                                  |
| 23    | <b>2c</b> instead of <b>2a</b>                                      | 15/0                                |
| 24    | <b>2d</b> instead of <b>2a</b>                                      | 27/0                                |
| 25    | No electric current                                                 | NR                                  |

<sup>a</sup>Standard conditions: reticulated vitreous carbon (RVC) cathode (100 PPI, 1 cm × 0.5 cm), Pt anode (1 cm × 0.2 cm),  $V = -5.0\text{ V}$ , **1a** (0.50 mmol, 1 equiv), **2** (0.60 mmol, 1.2 equiv), DMF (4 mL),  $n\text{-Bu}_4\text{NClO}_4$  (0.1 mol/L), 25 °C. <sup>b</sup>Isolated yields are reported. NR = no reaction.

**Discussion:** we chose aryltrimethylammonium triflate **1a** as a model substrate and TsCN (**2a**) as the cyanation agent, and we carried out reactions in an undivided cell under various conditions (Table 1). Encouragingly, when the reaction was performed in DMF containing *n*-Bu<sub>4</sub>NClO<sub>4</sub> at a constant voltage of -5 V using a Pt plate as the anode and reticulated vitreous carbon (RVC) as the cathode, desired nitrile **3a** was obtained in 78% isolated yield (entry 1). We also obtained a 71% yield of 4,4-dimethyldiphenyl disulfone (**4**) in the reaction. Evaluation of several different substrate anions (entries 2–4) showed that the triflate ion gave the highest yield. Anodic Me<sub>3</sub>N oxidation was appreciable under these conditions. Because we regarded the Me<sub>3</sub>N generated in situ as a sacrificial agent that was oxidized at the anode, we added an external sacrificial agent (Et<sub>3</sub>N) to the reaction mixture. However, this additive failed to improve the yield (entry 5). Replacing DMF with acetone, DCE, 1:1 DMF/MeOH, CH<sub>3</sub>CN, or DMSO resulted in low yields (entries 6–10). When we carried out the reaction under constant-current conditions or at a higher or lower voltage, the yield decreased dramatically (entries 11–13). In the absence of *n*-Bu<sub>4</sub>NClO<sub>4</sub> electrolyte, the yield was dropped to 9% (entry 14). When *n*-Bu<sub>4</sub>NPF<sub>6</sub>, *n*-Bu<sub>4</sub>NOTs, or LiClO<sub>4</sub> was used instead, no reaction occurred (entries 15–17). Variation of the electrode materials has a dramatic effect on the yield (entries 18–22). Moreover, although the desired product **3a** was detected when **2c** or **2d** was used as the cyanation agent, the yield was very low (entries 23 and 24). Finally, in the absence of an electric current, no **3a** was obtained (entry 25).

#### 4. General Procedure for the Cyanation and Cyanomethylation

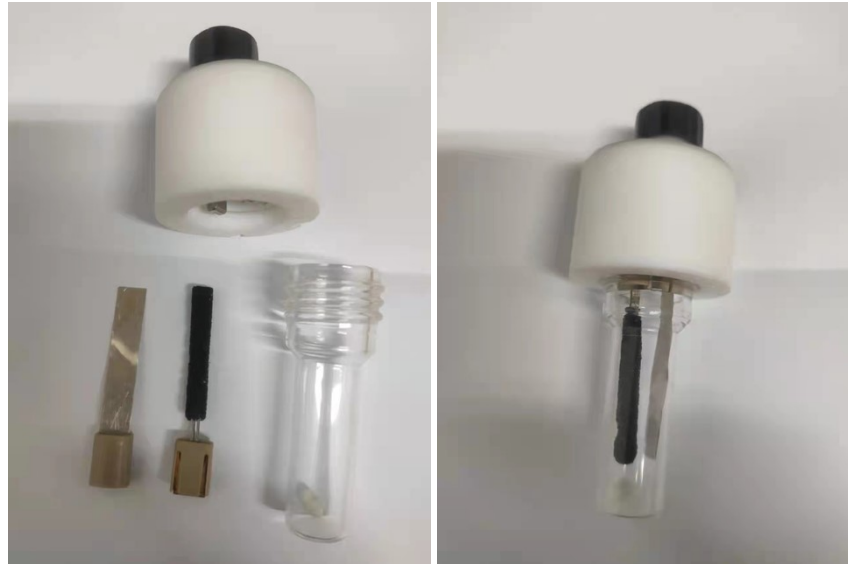

Reticulated Vitreous Carbon (RVC, Right) and Pt(Left)

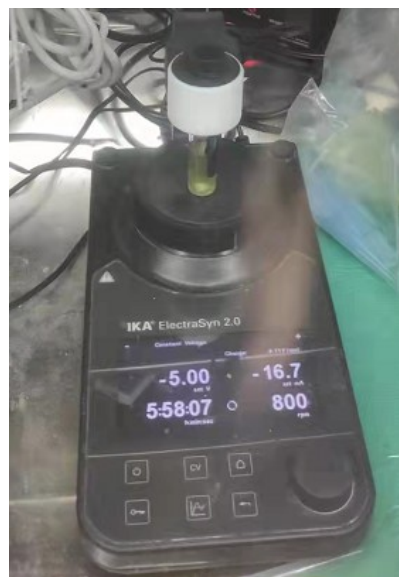

Current controlled electrolysis ( ElectroSyn 2.0 apparatus, IKA)

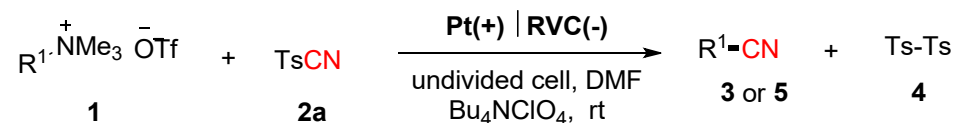

**General Procedure for the Cyanation of 1 with TsCN.** An undivided cell was equipped with a reticulated vitreous carbon (RVC) anode (100 PPI, 1 cm × 0.5 cm) and Pt cathode (1 cm × 0.2 cm) and connected to a DC regulated power supply. To the cell was added aryl- or benzyltrimethylammonium salts **1** (0.50 mmol), TsCN **2a** (0.6 mmol, 109 mg), *n*-Bu<sub>4</sub>NClO<sub>4</sub> (137 mg) and DMF (4 mL). The mixture was electrolyzed using V = -5.0 V at room temperature under magnetic stirring for 6-8 hours. TLC analysis indicated that the electrolysis was complete (witnessed by the disappearance of the **1**). The reaction mixture was poured into diethyl ether (30 mL), washed with water two times (20 mL × 2), dried over Na<sub>2</sub>SO<sub>4</sub>, and concentrated in vacuo. The residue was purified by column chromatography on silica gel using a mixture of petroleum ether/EtOAc (v : v = 50 : 1) as eluent to afford the desired pure product **3 or 5** and **4** (white solid).

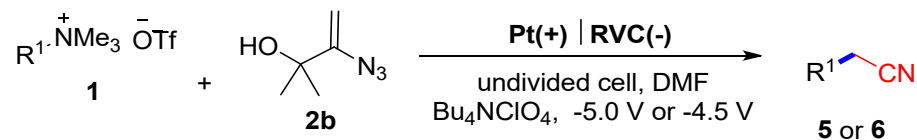

**General Procedure for the Cyanomethylation with 3-Azido-2-methylbut-3-en-2-ol.** An undivided cell was equipped with a reticulated vitreous carbon (RVC) anode (100 PPI, 1 cm × 0.5 cm) and Pt cathode (1 cm × 0.2 cm) and connected to a DC regulated power supply. To the cell was added aryl- or benzyltrimethylammonium salts **1**, 3-azido-2-methylbut-3-en-2-ol **2b** (0.55 mmol, 70 mg), *n*-Bu<sub>4</sub>NClO<sub>4</sub> (137 mg) and DMF (4 mL). The mixture was electrolyzed using  $V = -5.0$  V at 30 °C under magnetic stirring. When TLC analysis indicated that the electrolysis was complete (witnessed by the disappearance of the **1**). The reaction mixture was poured into diethyl ether (30 mL), washed with water two times (20 mL × 2), dried over Na<sub>2</sub>SO<sub>4</sub>, and concentrated in vacuo. The residue was purified by column chromatography on silica gel using a mixture of petroleum ether/EtOAc ( $v : v = 50 : 1$ ) as eluent to afford the desired pure product **5** or **6**.

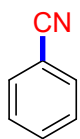

**3a**

Benzonitrile (**3a**),<sup>2</sup> 40.2 mg, 78% yield. <sup>1</sup>H NMR (500 MHz, Chloroform-d)  $\delta$  7.68 – 7.64 (m, 2H), 7.64 – 7.59 (m, 1H), 7.48 (t,  $J = 7.9$  Hz, 2H). <sup>13</sup>C NMR (126 MHz, CDCl<sub>3</sub>)  $\delta$  132.8, 132.1, 129.2, 118.9, 112.4. (Ts-Ts **4** was isolated with 71% yield.)

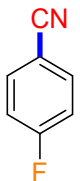

**3b**

4-Fluorobenzonitrile (**3b**),<sup>2</sup> 48.4 mg, 80% yield. <sup>1</sup>H NMR (500 MHz, Chloroform-d)  $\delta$  7.75 – 7.67 (m, 2H), 7.23 – 7.16 (m, 2H). <sup>13</sup>C NMR (126 MHz, CDCl<sub>3</sub>)  $\delta$  165.1 (d,  $J = 257.0$  Hz), 134.7 (d,  $J = 8.8$  Hz), 118.0, 116.9 (d,  $J = 22.7$  Hz), 108.6 (d,  $J = 3.8$  Hz). <sup>19</sup>F NMR (471 MHz, CDCl<sub>3</sub>)  $\delta$  -102.4. (Ts-Ts **4** was isolated with 75% yield.)

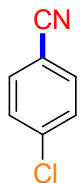

**3c**

4-Chlorobenzonitrile (**3c**),<sup>2</sup> 54.8 mg, 80% yield. <sup>1</sup>H NMR (500 MHz, Chloroform-d)  $\delta$  7.63-7.60 (m, 2H), 7.49-7.47 (m, 2H). <sup>13</sup>C NMR (126 MHz, CDCl<sub>3</sub>)  $\delta$  139.5, 133.4, 129.7, 118.0, 110.8. (Ts-Ts **4** was isolated with 73% yield.)



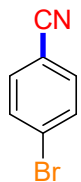**3d**

4-Bromobenzonitrile (**3d**),<sup>2</sup> 63.9 mg, 71% yield. <sup>1</sup>H NMR (500 MHz, Chloroform-d)  $\delta$  7.68 – 7.62 (m, 2H), 7.60 – 7.51 (m, 2H). <sup>13</sup>C NMR (126 MHz, CDCl<sub>3</sub>)  $\delta$  133.4, 132.7, 128.0, 118.1, 111.3. (Ts-Ts **4** was isolated with 65% yield.)

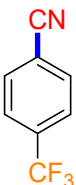**3e**

4-(Trifluoromethyl)benzonitrile (**3e**),<sup>2</sup> 67.5 mg, 79% yield. <sup>1</sup>H NMR (500 MHz, Chloroform-d)  $\delta$  7.83 (d, *J* = 8.3 Hz, 2H), 7.78 (d, *J* = 8.3 Hz, 2H). <sup>13</sup>C NMR (101 MHz, CDCl<sub>3</sub>)  $\delta$  134.5 (q, *J* = 26.9 Hz), 132.7, 126.2 (q, *J* = 9.1 Hz), 123.1 (q, *J* = 219.0 Hz), 117.4, 116.1. <sup>19</sup>F NMR (471 MHz, CDCl<sub>3</sub>)  $\delta$  -63.6. (Ts-Ts **4** was isolated with 71% yield.)

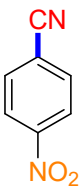**3f**

4-Nitrobenzonitrile (**3f**),<sup>2</sup> 17.0 mg, 23% yield. <sup>1</sup>H NMR (500 MHz, Chloroform-d)  $\delta$  8.38 (d, *J* = 8.4 Hz, 2H), 7.92 (d, *J* = 8.4 Hz, 2H). <sup>13</sup>C NMR (126 MHz, CDCl<sub>3</sub>)  $\delta$  150.1, 133.5, 124.3, 118.3, 116.8. (Ts-Ts **4** was isolated with 15% yield.)

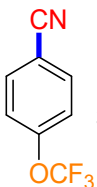**3g**

4-(Trifluoromethoxy)benzonitrile (**3g**),<sup>2</sup> 64.5 mg, 69% yield. <sup>1</sup>H NMR (500 MHz, Chloroform-d)  $\delta$  7.78 – 7.70 (m, 2H), 7.41 – 7.31 (m, 2H). <sup>13</sup>C NMR (101 MHz, CDCl<sub>3</sub>):  $\delta$  152.2 (q, *J* = 1.0 Hz), 134.2, 121.2, 120.2 (q, *J* = 208.4 Hz), 117.6, 110.8. <sup>19</sup>F NMR (471 MHz, CDCl<sub>3</sub>)  $\delta$  -57.8. (Ts-Ts **4** was isolated with 65% yield.)

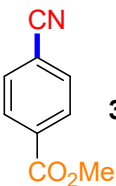**3h**

Methyl 4-cyanobenzoate (**3h**),<sup>2</sup> 60.0 mg, 72% yield. <sup>1</sup>H NMR (500 MHz, Chloroform-d)  $\delta$  8.18 – 8.11 (m, 2H), 7.83 – 7.70 (m, 2H), 3.96 (s, 3H). <sup>13</sup>C NMR (126 MHz, CDCl<sub>3</sub>)  $\delta$  165.4, 133.9, 132.2, 130.1, 118.0, 116.4, 52.7. (Ts-Ts **4** was isolated with 69% yield.)

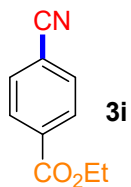

Ethyl 4-cyanobenzoate (**3i**),<sup>2</sup> 63.9 mg, 73% yield. <sup>1</sup>H NMR (500 MHz, Chloroform-d)  $\delta$  8.28 – 8.10 (m, 2H), 7.95 – 7.60 (m, 2H), 4.44 (d,  $J$  = 7.2, 1.1 Hz, 2H), 1.43 (td,  $J$  = 7.1, 1.0 Hz, 3H). <sup>13</sup>C NMR (126 MHz, CDCl<sub>3</sub>)  $\delta$  165.0, 134.3, 132.2, 130.1, 118.0, 116.3, 61.8, 14.2. (Ts-Ts **4** was isolated with 69% yield.)

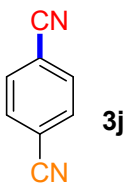

Terephthalonitrile (**3j**),<sup>2</sup> 48.6 mg, 76% yield. <sup>1</sup>H NMR (500 MHz, Chloroform-d)  $\delta$  7.82 (d,  $J$  = 1.2 Hz, 4H). <sup>13</sup>C NMR (126 MHz, CDCl<sub>3</sub>)  $\delta$  132.8, 117.0, 116.7. (Ts-Ts **4** was isolated with 71% yield.)

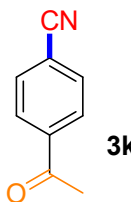

4-Acetylbenzonitrile (**3k**),<sup>2</sup> 55.1 mg, 76% yield. <sup>1</sup>H NMR (500 MHz, Chloroform-d)  $\delta$  8.13 – 8.02 (m, 2H), 7.87 – 7.72 (m, 2H), 2.67 (s, 3H). <sup>13</sup>C NMR (126 MHz, CDCl<sub>3</sub>)  $\delta$  196.5, 139.9, 132.5, 128.7, 117.9, 116.4, 26.8. (Ts-Ts **4** was isolated with 72% yield.)

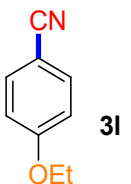

4-Ethoxybenzonitrile (**3l**),<sup>2</sup> 60.3 mg, 82% yield. <sup>1</sup>H NMR (500 MHz, Chloroform-d)  $\delta$  7.57 (dd,  $J$  = 9.1, 2.4 Hz, 2H), 7.11 – 6.84 (m, 2H), 4.08 (q,  $J$  = 7.0 Hz, 2H), 1.44 (t,  $J$  = 7.0 Hz, 3H). <sup>13</sup>C NMR (126 MHz, CDCl<sub>3</sub>)  $\delta$  162.3, 134.0, 119.3, 115.2, 103.7, 63.9, 14.6. (Ts-Ts **4** was isolated with 76% yield.)

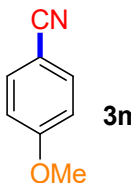

4-Methoxybenzonitrile (**3m**),<sup>2</sup> 53.9 mg, 81% yield. <sup>1</sup>H NMR (500 MHz, Chloroform-d)  $\delta$  7.57 (dd,  $J$  = 8.8, 1.6 Hz, 2H), 6.95 (dd,  $J$  = 8.8, 1.6 Hz, 2H), 3.85 (s, 3H). <sup>13</sup>C NMR (126 MHz, CDCl<sub>3</sub>)  $\delta$  162.9, 134.0, 119.2, 114.8, 103.9, 55.6. (Ts-Ts **4** was isolated with 76% yield.)

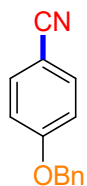

**3n** 4-(Benzyloxy)benzonitrile (**3n**),<sup>2</sup> 85.7 mg, 82% yield. <sup>1</sup>H NMR (500 MHz, Chloroform-d)  $\delta$  7.63 – 7.59 (m, 2H), 7.47 – 7.33 (m, 4H), 7.42 – 7.36 (m, 1H), 7.06 – 7.03 (m, 2H), 5.14 (s, 2H). <sup>13</sup>C NMR (126 MHz, CDCl<sub>3</sub>)  $\delta$  162.0, 135.7, 134.0, 128.8, 128.5, 127.5, 119.2, 115.6, 104.3, 70.3. (Ts-Ts **4** was isolated with 76% yield.)

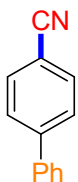

**3o** [1,1'-Biphenyl]-4-carbonitrile (**3o**),<sup>2</sup> 67.1 mg, 75% yield. <sup>1</sup>H NMR (500 MHz, Chloroform-d)  $\delta$  7.79 – 7.74 (m, 2H), 7.74 – 7.68 (m, 2H), 7.66 – 7.59 (m, 2H), 7.55 – 7.48 (m, 2H), 7.49 – 7.43 (m, 1H). <sup>13</sup>C NMR (126 MHz, CDCl<sub>3</sub>)  $\delta$  145.7, 139.2, 132.6, 129.1, 128.7, 127.8, 127.3, 119.0, 110.9. (Ts-Ts **4** was isolated with 70% yield.)

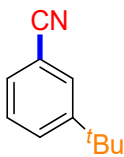

**3p** 3-(*Tert*-butyl)benzonitrile (**3p**),<sup>2</sup> 61.2 mg, 77% yield. <sup>1</sup>H NMR (500 MHz, Chloroform-d)  $\delta$  7.68 (t,  $J$  = 1.8 Hz, 1H), 7.64 (dq,  $J$  = 7.9, 1.5 Hz, 1H), 7.48 (dq,  $J$  = 7.5, 1.3 Hz, 1H), 7.41 (td,  $J$  = 7.7, 1.2 Hz, 1H), 1.35 (s, 9H). <sup>13</sup>C NMR (126 MHz, CDCl<sub>3</sub>)  $\delta$  152.5, 130.1, 129.2, 129.2, 128.9, 119.4, 112.1, 34.9, 31.0. (Ts-Ts **4** was isolated with 71% yield.)

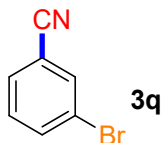

**3q** 3-Bromobenzonitrile (**3q**),<sup>2</sup> 72.0 mg, 80% yield. <sup>1</sup>H NMR (500 MHz, Chloroform-d)  $\delta$  7.80 (t,  $J$  = 1.8 Hz, 1H), 7.76 (dt,  $J$  = 8.2, 1.5 Hz, 1H), 7.62 (dt,  $J$  = 7.7, 1.3 Hz, 1H), 7.38 (t,  $J$  = 7.9 Hz, 1H). <sup>13</sup>C NMR (126 MHz, CDCl<sub>3</sub>)  $\delta$  136.2, 134.8, 130.7, 130.7, 122.9, 117.3, 114.2. (Ts-Ts **4** was isolated with 76% yield.)

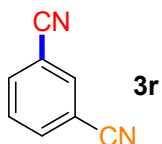

**3r** Isophthalonitrile (**3r**),<sup>2</sup> 58.7 mg, 76% yield. <sup>1</sup>H NMR (500 MHz, Chloroform-d)  $\delta$  7.98 (s, 1H), 7.93 (d,  $J$  = 7.9 Hz, 2H), 7.68 (t,  $J$  = 7.9 Hz, 1H). <sup>13</sup>C NMR (126 MHz, CDCl<sub>3</sub>)  $\delta$  136.0, 135.4, 130.4, 116.6, 114.2. (Ts-Ts **4** was isolated with 71% yield.)

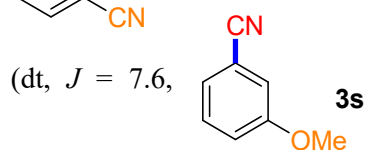

**3s** 3-Methoxybenzonitrile (**3s**),<sup>2</sup> 52.5 mg, 79% yield. <sup>1</sup>H NMR (500 MHz, Chloroform-d)  $\delta$  7.37 – 7.32 (m, 1H), 7.20

1.2 Hz, 1H), 7.12 – 7.10 (m, 2H), 3.80 (s, 3H).  $^{13}\text{C}$  NMR (126 MHz,  $\text{CDCl}_3$ )  $\delta$  159.6, 130.4, 124.4, 119.2, 118.7, 116.9, 113.1, 55.5. (Ts-Ts **4** was isolated with 70% yield.)

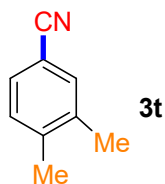

3,4-Dimethylbenzonitrile (**3t**),<sup>2</sup> 53.1 mg, 81% yield.  $^1\text{H}$  NMR (500 MHz, Chloroform-*d*)  $\delta$  7.45 – 7.36 (m, 2H), 7.23 (d,  $J = 7.7$  Hz, 1H), 2.34 (s, 3H), 2.30 (s, 3H).  $^{13}\text{C}$  NMR (126 MHz,  $\text{CDCl}_3$ )  $\delta$  142.5, 137.9, 132.8, 130.3, 129.6, 119.3, 109.5, 20.1, 19.6. (Ts-Ts **4** was isolated with 72% yield.)

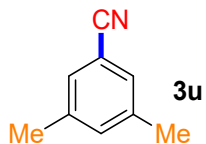

3,5-Dimethylbenzonitrile (**3u**),<sup>2</sup> 50.4 mg, 77% yield.  $^1\text{H}$  NMR (500 MHz, Chloroform-*d*)  $\delta$  7.27 (s, 2H), 7.23 (s, 1H), 2.36 (s, 6H).  $^{13}\text{C}$  NMR (126 MHz,  $\text{CDCl}_3$ )  $\delta$  139.0, 134.6, 129.7, 119.2, 112.0, 21.0. (Ts-Ts **4** was isolated with 70% yield.)

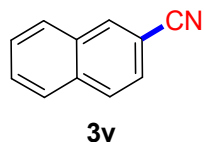

2-Naphthonitrile (**3v**),<sup>2</sup> 63.5 mg, 83% yield.  $^1\text{H}$  NMR (500 MHz, Chloroform-*d*)  $\delta$  8.23 (d,  $J = 1.8$  Hz, 1H), 7.97 – 7.85 (m, 3H), 7.71 – 7.55 (m, 3H).  $^{13}\text{C}$  NMR (126 MHz,  $\text{CDCl}_3$ )  $\delta$  134.7, 134.2, 132.3, 129.2, 129.1, 128.4, 128.1, 127.7, 126.3, 119.3, 109.4. (Ts-Ts **4** was isolated with 75% yield.)

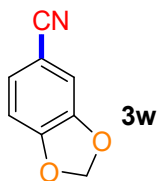

Benzo[d][1,3]dioxole-5-carbonitrile (**3w**),<sup>2</sup> 58.8 mg, 80% yield.  $^1\text{H}$  NMR (500 MHz, Chloroform-*d*)  $\delta$  7.22 (dd,  $J = 8.1, 1.7$  Hz, 1H), 7.04 (d,  $J = 1.7$  Hz, 1H), 6.87 (d,  $J = 8.0$  Hz, 1H), 6.08 (s, 2H).  $^{13}\text{C}$  NMR (126 MHz,  $\text{CDCl}_3$ )  $\delta$  151.6, 148.1, 128.2, 118.9, 111.4, 109.1, 104.9, 102.3. (Ts-Ts **4** was isolated with 75% yield.)

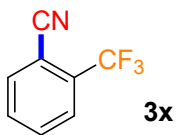

2-(Trifluoromethyl)benzonitrile (**3x**),<sup>2</sup> 59.8 mg, 70% yield. <sup>1</sup>H NMR (500 MHz, Chloroform-d) δ 7.63 (dd, *J* = 7.7, 1.5 Hz, 1H), 7.60 – 7.55 (m, 1H), 7.53 (s, 1H), 7.49 (d, *J* = 8.4 Hz, 1H). <sup>13</sup>C NMR (126 MHz, CDCl<sub>3</sub>) δ 149.2 (q, *J* = 1.3 Hz), 131.0, 130.6, 125.6, 124.4, 120.2 (q, *J* = 259.6 Hz), 117.2, 114.1. <sup>19</sup>F NMR (471 MHz, CDCl<sub>3</sub>) δ -58.2. (Ts-Ts **4** was isolated with 68% yield.)

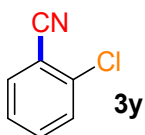

2-Chlorobenzonitrile (**3y**),<sup>2</sup> 43.2 mg, 63% yield. <sup>1</sup>H NMR (500 MHz, Chloroform-d) δ 7.70 (dd, *J* = 7.8, 1.6 Hz, 1H), 7.60 – 7.50 (m, 2H), 7.40 (td, *J* = 7.5, 1.5 Hz, 1H). <sup>13</sup>C NMR (126 MHz, CDCl<sub>3</sub>) δ 136.9, 134.0, 133.9, 130.1, 127.2, 116.0, 113.4. (Ts-Ts **4** was isolated with 57% yield.)

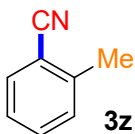

2-Methylbenzonitrile (**3z**),<sup>2</sup> 35.1 mg, 60% yield. <sup>1</sup>H NMR (500 MHz, Chloroform-d) δ 7.59 (dd, *J* = 7.8, 1.4 Hz, 1H), 7.49 (td, *J* = 7.7, 1.4 Hz, 1H), 7.33 (d, *J* = 7.8 Hz, 1H), 7.28 (t, *J* = 7.5 Hz, 1H), 2.55 (s, 3H). <sup>13</sup>C NMR (126 MHz, CDCl<sub>3</sub>) δ 141.9, 132.7, 132.5, 130.3, 126.2, 118.1, 112.8, 20.4. (Ts-Ts **4** was isolated with 52% yield.)

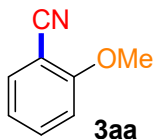

2-Methoxybenzonitrile (**3aa**),<sup>2</sup> 36.6 mg, 55% yield. <sup>1</sup>H NMR (500 MHz, Chloroform-d) δ 7.56 (ddd, *J* = 9.7, 5.7, 2.7 Hz, 2H), 7.11 – 6.94 (m, 2H), 3.94 (s, 3H). <sup>13</sup>C NMR (126 MHz, CDCl<sub>3</sub>) δ 161.3, 134.4, 133.8, 120.8, 116.5, 111.3, 101.8, 56.0. (Ts-Ts **4** was isolated with 48% yield.)

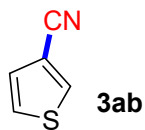

Thiophene-3-carbonitrile (**3ab**),<sup>2</sup> 38.9 mg, 72% yield. <sup>1</sup>H NMR (500 MHz, Chloroform-d) δ 7.96 (dd, *J* = 3.0, 1.2 Hz, 1H), 7.45 (dd, *J* = 5.1, 3.0 Hz, 1H), 7.32 (dd, *J* = 5.1, 1.2 Hz, 1H). <sup>13</sup>C NMR (126 MHz, CDCl<sub>3</sub>) δ 135.4, 128.7, 127.4, 115.2, 110.7. (Ts-Ts **4** was isolated with 67% yield.)

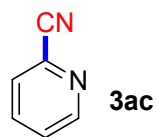

Picolinonitrile (**3ac**),<sup>2</sup> 32.8 mg, 63% yield. <sup>1</sup>H NMR (500 MHz, Chloroform-d)  $\delta$  8.72 (dt,  $J = 6.5, 2.0$  Hz, 1H), 7.87 (td,  $J = 7.8, 1.7$  Hz, 1H), 7.71 (dt,  $J = 7.7, 1.2$  Hz, 1H), 7.55 (ddd,  $J = 7.8, 4.8, 1.3$  Hz, 1H). <sup>13</sup>C NMR (126 MHz, CDCl<sub>3</sub>)  $\delta$  151.2, 137.1, 133.9, 128.6, 127.0, 117.2. (Ts-Ts **4** was isolated with 58% yield.)

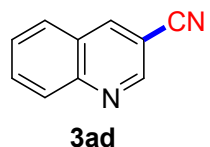

Quinoline-3-carbonitrile (**3ad**),<sup>2</sup> 52.4 mg, 68% yield. <sup>1</sup>H NMR (500 MHz, Chloroform-d)  $\delta$  9.04 (d,  $J = 2.1$  Hz, 1H), 8.55 (d,  $J = 2.1$  Hz, 1H), 8.25 – 8.15 (m, 1H), 7.99 – 7.89 (m, 2H), 7.77 – 7.67 (m, 1H). <sup>13</sup>C NMR (126 MHz, CDCl<sub>3</sub>)  $\delta$  149.7, 148.8, 141.5, 132.8, 129.9, 128.5, 128.3, 126.2, 117.1, 106.6. (Ts-Ts **4** was isolated with 61% yield.)

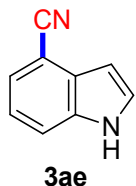

4-(4-Methylphenylsulfonimidoyl)morpholine (**3ae**),<sup>2</sup> 44.0 mg, 62% yield. <sup>1</sup>H NMR (500 MHz, Chloroform-d)  $\delta$  9.01 – 8.73 (s, br, 1H), 7.69 (d,  $J = 8.2$  Hz, 1H), 7.57 – 7.49 (m, 1H), 7.44 (t,  $J = 2.9$  Hz, 1H), 7.26 (q,  $J = 7.8, 7.2$  Hz, 1H), 6.84 – 6.66 (m, 1H). <sup>13</sup>C NMR (126 MHz, CDCl<sub>3</sub>)  $\delta$  135.6, 129.3, 127.2, 125.4, 121.6, 119.1, 116.2, 102.7, 101.5. (Ts-Ts **4** was isolated with 55% yield.)

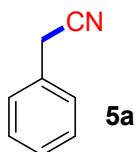

2-Phenylacetonitrile (**5a**),<sup>2</sup> For cyanation reaction, 7.0 mg **5a** was isolated, 12% yield; Ts-Ts **4** was isolated with trace yield; for cyanomethylation reaction, 36.9 mg **5a** was isolated, 63% yield; <sup>1</sup>H NMR (500 MHz, Chloroform-d)  $\delta$  7.50 – 7.33 (m, 5H), 3.75 (s, 2H). <sup>13</sup>C NMR (126 MHz, CDCl<sub>3</sub>)  $\delta$  130.1, 129.2, 128.1, 128.0, 118.0, 23.6.

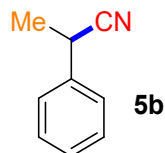

2-Phenylpropanenitrile (**5b**),<sup>2</sup> 32.1 mg, 49% yield. <sup>1</sup>H NMR (400 MHz, Chloroform-d)  $\delta$  7.31 – 7.13 (m, 5H), 3.75 (q,  $J = 7.3$  Hz, 1H), 1.49 (d,  $J = 7.3$  Hz, 3H). <sup>13</sup>C NMR (101 MHz, CDCl<sub>3</sub>)  $\delta$  137.1, 129.2, 128.1, 126.7, 121.7, 31.3, 21.5. (Ts-Ts **4** was isolated with 41% yield.)

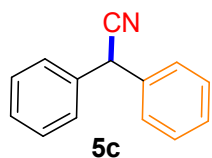

2,2-Diphenylacetonitrile (**5c**),<sup>2</sup> 40.5 mg, 42% yield. <sup>1</sup>H NMR (400 MHz, Chloroform-d)  $\delta$  7.48 – 7.31 (m, 10H), 5.18 (s, 1H). <sup>13</sup>C NMR (101 MHz, CDCl<sub>3</sub>)  $\delta$  136.0, 129.2, 128.3, 127.8, 119.8, 42.6. (Ts-Ts **4** was isolated with 36% yield.)

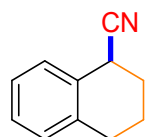

1,2,3,4-Tetrahydronaphthalene-1-carbonitrile (**5d**),<sup>2</sup> 36.9 mg, 47% yield. <sup>1</sup>H NMR (400 MHz, Chloroform-d)  $\delta$  7.40 (dd,  $J$  = 6.6, 2.3 Hz, 1H), 7.25 (tt,  $J$  = 7.4, 5.4 Hz, 2H), 7.16 (dd,  $J$  = 6.5, 2.4 Hz, 1H), 4.01 (t,  $J$  = 6.4 Hz, 1H), 2.96 – 2.73 (m, 2H), 2.24-2.13 (m, 2H), 2.11-2.02 (m, 1H), 1.92-1.83 (m, 1H). <sup>13</sup>C NMR (101 MHz, CDCl<sub>3</sub>)  $\delta$  136.5, 129.9, 129.8, 128.9, 128.0, 126.6, 121.9, 30.8, 28.4, 27.4, 20.8. (Ts-Ts **4** was isolated with 41% yield.)

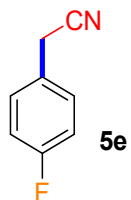

2-(4-Fluorophenyl)acetonitrile (**5e**),<sup>2</sup> 45.2 mg, 67% yield. <sup>1</sup>H NMR (500 MHz, Chloroform-d)  $\delta$  7.32 (dd,  $J$  = 8.5, 5.2 Hz, 2H), 7.08 (td,  $J$  = 8.7, 2.3 Hz, 2H), 3.74 (s, 2H). <sup>13</sup>C NMR (126 MHz, CDCl<sub>3</sub>)  $\delta$  162.4 (d,  $J$  = 248.2 Hz), 129.7 (d,  $J$  = 8.8 Hz), 125.7 (d,  $J$  = 3.8 Hz), 116.1 (d,  $J$  = 22.7 Hz), 117.8, 22.9. <sup>19</sup>F NMR (471 MHz, CDCl<sub>3</sub>)  $\delta$  -113.9.

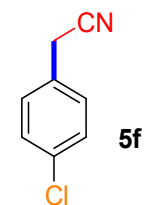

2-(4-Chlorophenyl)acetonitrile (**5f**),<sup>2</sup> 48.3 mg, 64% yield. <sup>1</sup>H NMR (500 MHz, Chloroform-d)  $\delta$  7.40 – 7.34 (m, 2H), 7.28 (d,  $J$  = 8.4 Hz, 2H), 3.74 (s, 2H). <sup>13</sup>C NMR (126 MHz, CDCl<sub>3</sub>)  $\delta$  134.1, 129.3, 129.3, 128.5, 117.5, 23.1.

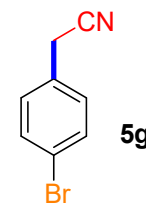

2-(4-Bromophenyl)acetonitrile (**5g**),<sup>2</sup> 62.1 mg, 64% yield. <sup>1</sup>H NMR (500 MHz, Chloroform-d)  $\delta$  7.53 (dt,  $J$  = 8.4, 1.6 Hz, 2H), 7.27 – 7.16 (m, 2H), 3.73 (s, 2H). <sup>13</sup>C NMR (126 MHz, CDCl<sub>3</sub>)  $\delta$  132.3, 129.6, 129.0, 122.2, 117.4, 23.2.

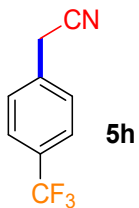

2-(4-(Trifluoromethyl)phenyl)acetonitrile (**5h**),<sup>2</sup> 50.9 mg, 55% yield. <sup>1</sup>H NMR (500 MHz, Chloroform-d)  $\delta$  7.66 (d,  $J$  = 8.1 Hz, 2H), 7.49 (d,  $J$  = 7.9 Hz, 2H), 3.84 (s, 2H). <sup>13</sup>C NMR (126 MHz, CDCl<sub>3</sub>)  $\delta$  134.0, 130.5 (q,  $J$  = 32.8 Hz), 128.4, 126.1 (q,  $J$  = 3.8 Hz), 123.8 (q,  $J$  = 273.4 Hz), 117.1. <sup>19</sup>F NMR (471 MHz, CDCl<sub>3</sub>)  $\delta$  -62.8.

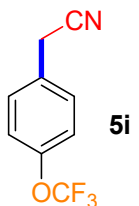

2-(4-(Trifluoromethoxy)phenyl)acetonitrile (**5i**),<sup>2</sup> 59.3 mg, 59% yield. <sup>1</sup>H NMR (500 MHz, Chloroform-d)  $\delta$  7.40 (d,  $J$  = 8.4 Hz, 2H), 7.26 (d,  $J$  = 8.3 Hz, 2H), 3.79 (s, 2H). <sup>13</sup>C NMR (126 MHz, CDCl<sub>3</sub>)  $\delta$  149.0, 129.5, 128.6, 121.7, 120.4 (q,  $J$  = 258.3 Hz), 117.4, 23.1. <sup>19</sup>F NMR (471 MHz, CDCl<sub>3</sub>)  $\delta$  -58.0.

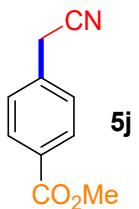

Methyl 4-(cyanomethyl)benzoate (**5j**),<sup>2</sup> 42.9 mg, 49% yield. <sup>1</sup>H NMR (500 MHz, Chloroform-d)  $\delta$  8.07 (d,  $J$  = 8.2 Hz, 2H), 7.43 (d,  $J$  = 8.0 Hz, 2H), 3.94 (s, 3H), 3.84 (s, 2H). <sup>13</sup>C NMR (126 MHz, CDCl<sub>3</sub>)  $\delta$  166.4, 134.8, 130.4, 130.1, 128.0, 117.2, 52.3, 23.7.

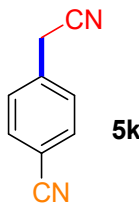

4-(Cyanomethyl)benzotrile (**5k**),<sup>2</sup> 36.2 mg, 51% yield. <sup>1</sup>H NMR (500 MHz, Chloroform-d)  $\delta$  7.81 – 7.65 (m, 2H), 7.49 (d,  $J$  = 8.2 Hz, 2H), 3.86 (s, 2H). <sup>13</sup>C NMR (126 MHz, CDCl<sub>3</sub>)  $\delta$  135.3, 132.9, 128.8, 118.2, 116.7, 112.3, 23.8.



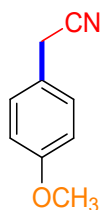

**5l**

2-(4-Methoxyphenyl)acetonitrile (**5l**),<sup>2</sup> 49.98 mg, 68% yield. <sup>1</sup>H NMR (500 MHz, Chloroform-*d*)  $\delta$  7.28 – 7.21 (m, 2H), 6.98 – 6.89 (m, 2H), 3.83 (s, 3H), 3.70 (s, 2H). <sup>13</sup>C NMR (126 MHz, CDCl<sub>3</sub>)  $\delta$  159.4, 129.1, 121.8, 118.3, 114.5, 55.4, 22.8.

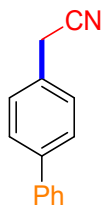

**5m**

2-([1,1'-Biphenyl]-4-yl)acetonitrile (**5m**),<sup>2</sup> 59.8 mg, 62% yield. <sup>1</sup>H NMR (500 MHz, Chloroform-*d*)  $\delta$  7.74 – 7.58 (m, 4H), 7.52 – 7.46 (m, 2H), 7.46 – 7.38 (m, 3H), 3.82 (s, 2H). <sup>13</sup>C NMR (126 MHz, CDCl<sub>3</sub>)  $\delta$  141.1, 140.2, 128.9, 128.9, 128.4, 127.9, 127.7, 127.1, 117.8, 23.4.

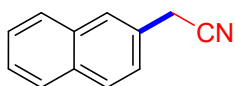

**5n**

2-(Naphthalen-2-yl)acetonitrile (**5n**),<sup>2</sup> 50.9 mg, 61% yield. <sup>1</sup>H NMR (500 MHz, Chloroform-*d*)  $\delta$  7.87 (dt, *J* = 9.5, 5.6 Hz, 4H), 7.55 (qd, *J* = 6.9, 3.5 Hz, 2H), 7.41 (dd, *J* = 8.4, 2.0 Hz, 1H), 3.93 (s, 2H). <sup>13</sup>C NMR (126 MHz, CDCl<sub>3</sub>)  $\delta$  133.4, 132.7, 129.1, 127.8, 127.7, 127.2, 126.9, 126.8, 126.5, 125.5, 117.9, 23.9.

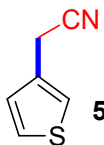

**5o**

2-(Thiophen-3-yl)acetonitrile (**5o**),<sup>2</sup> 32.0 mg, 52% yield. <sup>1</sup>H NMR (500 MHz, Chloroform-*d*)  $\delta$  7.37 (dd, *J* = 5.0, 3.0 Hz, 1H), 7.26 (dd, *J* = 2.9, 1.4 Hz, 1H), 7.04 (dd, *J* = 5.1, 1.4 Hz, 1H), 3.74 (s, 2H). <sup>13</sup>C NMR (126 MHz, CDCl<sub>3</sub>)  $\delta$  129.6, 127.3, 127.1, 123.2, 117.8, 18.8.

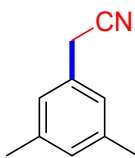

**5p**

2-(3,5-Dimethylphenyl)acetonitrile (**5p**),<sup>2</sup> 40.6 mg, 56% yield. <sup>1</sup>H NMR (400 MHz, Chloroform-*d*)  $\delta$  6.98 (d, *J* = 7.3 Hz, 3H), 3.69 (s, 2H), 2.35 (d, *J* = 1.8 Hz, 6H). <sup>13</sup>C NMR (100 MHz, CDCl<sub>3</sub>)  $\delta$  138.9, 129.7, 129.6, 125.7, 118.2, 23.4, 21.2.

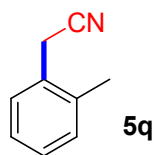

2-(3,5-Dimethylphenyl)acetonitrile (**5q**),<sup>2</sup> 38.6 mg, 59% yield. <sup>1</sup>H NMR (500 MHz, Chloroform-d)  $\delta$  7.41 – 7.36 (m, 1H), 7.33 – 7.22 (m, 3H), 3.69 (s, 2H), 2.37 (s, 3H). <sup>13</sup>C NMR (126 MHz, CDCl<sub>3</sub>)  $\delta$  136.1, 130.7, 128.6, 128.4, 126.8, 117.6, 21.9, 19.3.

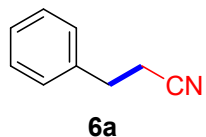

3-Phenylpropanenitrile (**6a**),<sup>2</sup> 32.1 mg, 49% yield. <sup>1</sup>H NMR (500 MHz, Chloroform-d)  $\delta$  7.41 – 7.35 (m, 2H), 7.34 – 7.30 (m, 1H), 7.29 – 7.25 (m, 2H), 2.98 (t, *J* = 7.4 Hz, 2H), 2.63 (t, *J* = 7.4 Hz, 2H). <sup>13</sup>C NMR (126 MHz, CDCl<sub>3</sub>)  $\delta$  138.2, 128.9, 128.3, 127.3, 119.3, 31.6, 19.3.

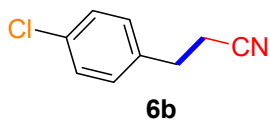

3-(4-Chlorophenyl)propanenitrile (**6b**),<sup>2</sup> 26.4 mg, 32% yield. <sup>1</sup>H NMR (500 MHz, Chloroform-d)  $\delta$  7.41 – 7.30 (m, 2H), 7.20 (d, *J* = 8.0 Hz, 2H), 2.95 (t, *J* = 7.3 Hz, 2H), 2.63 (td, *J* = 7.3, 1.2 Hz, 2H). <sup>13</sup>C NMR (126 MHz, CDCl<sub>3</sub>)  $\delta$  136.5, 133.2, 129.7, 129.1, 118.8, 30.9, 19.3.

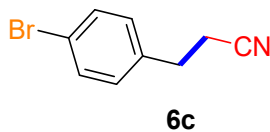

3-(4-Bromophenyl)propanenitrile (**6c**),<sup>2</sup> 35.4 mg, 34% yield. <sup>1</sup>H NMR (500 MHz, Chloroform-d)  $\delta$  7.52 – 7.42 (m, 2H), 7.21 – 6.99 (m, 2H), 2.92 (t, *J* = 7.3 Hz, 2H), 2.62 (t, *J* = 7.3 Hz, 2H). <sup>13</sup>C NMR (126 MHz, CDCl<sub>3</sub>)  $\delta$  137.0, 132.0, 130.1, 121.2, 118.9, 31.0, 19.2.

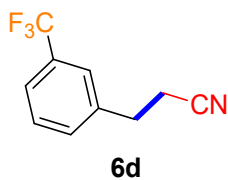

3-(3-(Trifluoromethyl)phenyl)propanenitrile (**6d**),<sup>2</sup> 29.9 mg, 30% yield. <sup>1</sup>H NMR (400 MHz, Chloroform-d)  $\delta$  7.60 – 7.56 (m, 1H), 7.54 – 7.44 (m, 3H), 3.05 (t, *J* = 7.3 Hz, 2H), 2.68 (t, *J* = 7.3 Hz, 2H). <sup>13</sup>C NMR (101 MHz, CDCl<sub>3</sub>)  $\delta$  138.9, 131.8, 131.2 (q, *J* = 32.3 Hz), 129.4, 125.1 (q, *J* = 3.0 Hz), 124.2 (q, *J* = 3.7 Hz), 124.0 (q, *J* = 273.4 Hz), 118.6, 31.3, 19.2. <sup>19</sup>F NMR (376 MHz, CDCl<sub>3</sub>)  $\delta$  -62.7.

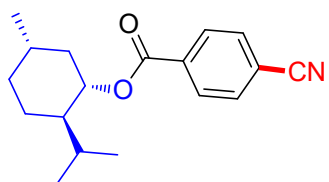

(1*S*,2*R*,5*S*)-2-Isopropyl-5-methylcyclohexyl 4-cyanobenzoate,<sup>3</sup> 43.3 mg, 76% yield. <sup>1</sup>H NMR (400 MHz, CDCl<sub>3</sub>) δ 8.15 (d, *J* = 8.4 Hz, 2H), 7.76 (d, *J* = 8.5 Hz, 2H), 4.97 (td, *J* = 10.9, 4.4 Hz, 1H), 2.12 (dtd, *J* = 12.0, 4.1, 1.7 Hz, 1H), 1.97 – 1.86 (m, 1H), 1.71 (s, 2H), 1.57 (ddt, *J* = 12.4, 10.8, 3.3 Hz, 2H), 1.13 (tdd, *J* = 12.1, 10.3, 7.8 Hz, 2H), 0.93 (dd, *J* = 6.9, 4.9 Hz, 6H), 0.91 – 0.85 (m, 1H), 0.80 (d, *J* = 7.0 Hz, 3H). <sup>13</sup>C NMR (101 MHz, CDCl<sub>3</sub>) δ 164.4,

134.6, 132.2, 130.1, 118.0, 116.2, 75.9, 47.2, 40.8, 34.2, 31.4, 26.5, 23.6, 22.0, 20.7, 16.5.

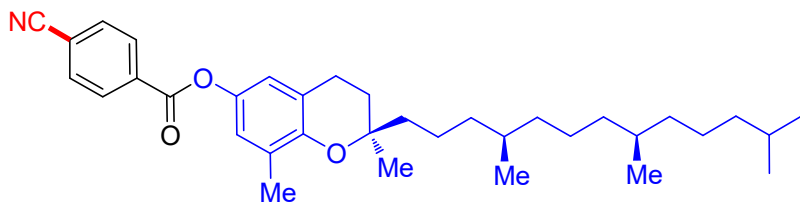

(*R*)-2,8-Dimethyl-2-((4*R*,8*R*)-4,8,12-trimethyltridecyl)chroman-6-yl 4-cyanobenzoate,<sup>3</sup> 76.5 mg, 72% yield. <sup>1</sup>H NMR (400 MHz, CDCl<sub>3</sub>) δ 8.17 – 8.05 (m, 2H), 7.79 – 7.69 (m, 2H), 5.48 – 5.34 (m, 1H), 4.88 (tdd, *J* = 9.6, 7.5, 4.5 Hz, 1H), 2.49 – 2.44 (m, 2H), 2.06 – 0.84 (m, 41H), 0.69 (s, 3H).

<sup>13</sup>C NMR (100 MHz, CDCl<sub>3</sub>) δ 164.3, 139.3, 134.7, 132.2, 130.1, 123.2, 118.1, 116.2, 75.6, 56.7, 56.1, 50.0, 42.3, 39.7, 39.5, 38.1, 37.0, 36.6, 36.2, 35.8, 31.9, 31.9, 28.2, 28.0, 27.8, 24.3, 23.9, 22.9, 22.6, 21.1, 19.4, 18.7, 11.9.

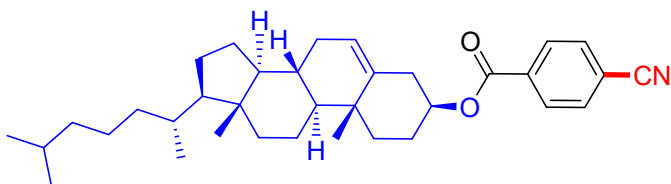

(3*S*,8*S*,9*S*,10*R*,13*R*,14*S*,17*R*)-10,13-Dimethyl-17-((*R*)-6-methylheptan-2-yl)-2,3,4,7,8,9,10,11,12,13,14,15,16,17-tetradecahydro-1H-cyclopenta[*a*]phenanthren-3-yl 4-cyanobenzoate,<sup>4</sup> 71.1 mg, 69% yield. <sup>1</sup>H NMR (400 MHz, CDCl<sub>3</sub>) δ 8.38 – 8.26 (m, 2H), 7.88 – 7.75 (m, 2H), 2.62 (t, *J* = 6.7 Hz, 2H), 2.12 (s, 3H), 2.02 (d, *J* = 15.9 Hz, 6H), 1.82 (td, *J* = 12.0, 10.6, 5.7 Hz, 2H), 1.67 – 1.49 (m, 4H), 1.44 – 1.03 (m, 24H), 0.86 (t, *J* = 6.7 Hz, 14H).

<sup>13</sup>C NMR (101 MHz, CDCl<sub>3</sub>) δ 163.6, 149.8, 140.4, 133.5, 132.5, 130.6, 126.6, 124.9, 123.4, 118.0, 117.7, 116.9, 75.2, 39.4, 37.4, 37.3, 32.8, 32.8, 32.7, 28.0, 24.8, 24.5, 22.8, 22.7, 22.7, 21.1, 20.7, 19.8, 19.7, 19.6, 13.1, 12.2, 11.9.

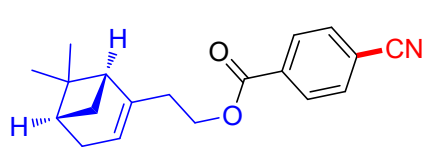

2-((1*R*,5*S*)-6,6-Dimethylbicyclo[3.1.1]hept-2-en-2-yl)ethyl 4-cyanobenzoate, 36.6 mg, 62% yield.  $^1\text{H}$  NMR (400 MHz,  $\text{CDCl}_3$ )  $\delta$  8.22 – 8.05 (m, 2H), 7.87 – 7.66 (m, 2H), 5.37 (tt,  $J = 3.0, 1.5$  Hz, 1H), 4.46 – 4.28 (m, 2H), 2.44 (tt,  $J = 7.0, 1.4$  Hz, 2H), 2.38 (dt,  $J = 8.5, 5.6$  Hz, 1H), 2.24 (ddt,  $J = 11.1, 2.7, 1.4$  Hz, 2H), 2.11 (dt,  $J = 6.5, 2.4$  Hz, 2H), 1.28 (s, 3H), 1.16 (d,  $J = 8.5$  Hz, 1H), 0.83 (s, 4H).  $^{13}\text{C}$  NMR (100 MHz,  $\text{CDCl}_3$ )  $\delta$  164.8, 143.9, 134.2, 132.2, 130.0, 119.2, 118.0, 116.3, 64.0, 45.7, 40.7, 38.0, 35.9, 31.7, 31.4, 26.2, 21.1. HRMS  $m/z$  (ESI) calcd. for  $\text{C}_{19}\text{H}_{21}\text{NNaO}_2$  ( $\text{M} + \text{Na}$ ) $^+$  318.1470, found 318.1470.

**Ts-Ts** 4,4'-Dimethyldiphenyl disulfone (**4**),  $^1\text{H}$  NMR (400 MHz, Chloroform- $d$ )  $\delta$  7.84 (d,  $J = 8.4$  Hz, 4H), 7.43 (d,  $J = 8.1$  Hz, 4H), 2.51 (s, 6H).  
**4**  $^{13}\text{C}$  NMR (101 MHz,  $\text{CDCl}_3$ )  $\delta$  148.1, 131.5, 130.4, 128.0, 22.0.

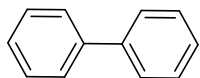

**7**

1,1'-Biphenyl (**7**), 20% yield.  $^1\text{H}$  NMR (400 MHz, Chloroform- $d$ )  $\delta$  7.59 (d,  $J = 7.6$  Hz, 4H), 7.44 (t,  $J = 7.5$  Hz, 4H), 7.34 (t,  $J = 7.4$  Hz, 2H).  $^{13}\text{C}$  NMR (126 MHz,  $\text{CDCl}_3$ )  $\delta$  141.3, 128.9, 127.4, 127.3.

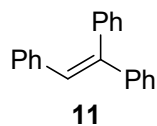

**11**

Ethene-1,1,2-triyltribenzene (**11**), 27% yield.  $^1\text{H}$  NMR (400 MHz, Chloroform- $d$ )  $\delta$  7.31 (q,  $J = 8.0, 5.9$  Hz, 8H), 7.20 (dd,  $J = 7.0, 2.8$  Hz, 2H), 7.12 (d,  $J = 7.3$  Hz, 3H), 7.03 (d,  $J = 7.2$  Hz, 2H), 6.97 (s, 1H).  $^{13}\text{C}$  NMR (126 MHz,  $\text{CDCl}_3$ )  $\delta$  143.5, 142.6, 140.4, 137.4, 130.5, 129.6, 128.7, 128.3, 128.2, 128.0, 127.7, 127.6, 127.5, 126.8.

## 5. One-pot-two-step Reaction

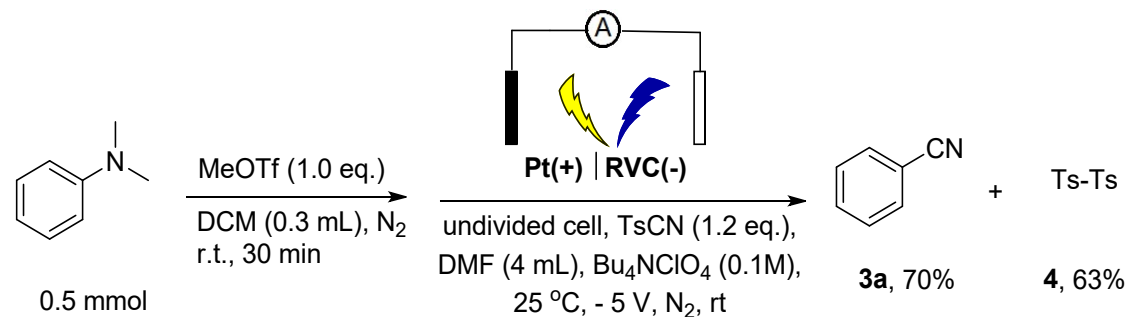

Methyl triflate (56.6  $\mu$ L, 0.50 mmol) was added dropwise into the DCM solution of *N,N*-dimethylaniline (63.4  $\mu$ L, 0.05 mmol) in a Schlenk tube with a strong stirring at room temperature. After 30 minutes, the solution of the TsCN **2a** (0.6 mmol, 109 mg), *n*-Bu<sub>4</sub>NClO<sub>4</sub> (137mg) in 4 mL DMF were added by syringe respectively. The mixture was electrolyzed using  $V = -4.5$  V at 30 °C under magnetic stirring. When TLC analysis indicated that the electrolysis was complete. The reaction mixture was poured into diethyl ether (30 mL), washed with water two times (20 mL  $\times$  2), dried over Na<sub>2</sub>SO<sub>4</sub>, and concentrated in vacuo. The residue was purified by column chromatography on silica gel using a mixture of petroleum ether/EtOAc ( $v : v = 50 : 1$ ) as eluent to afford the desired pure product **3a** (36.1 mg, 70%).

## 6. Cyclic Voltammetry

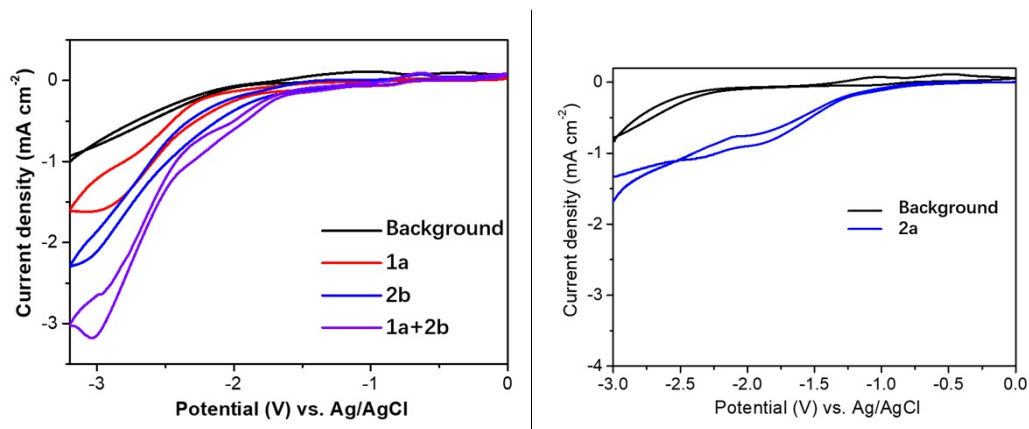

**Fig. S1** Cyclic voltammograms of related compounds in DMF with 0.10 M *n*-Bu<sub>4</sub>NClO<sub>4</sub> under N<sub>2</sub> atmosphere. 2 mm diameter Pt electrode, carbon rod, and Ag/AgCl were used as the working, counter, and the reference electrode. Voltammograms were recorded at 100 mV s<sup>-1</sup>. Left: (1) background; (2) **2b** (0.05 M); (3) **1a** (0.05 M); (4) **2d** (0.05 M). Right: (1) background; (2) **2a** (0.05 M).

## 7. Copies of NMR spectra

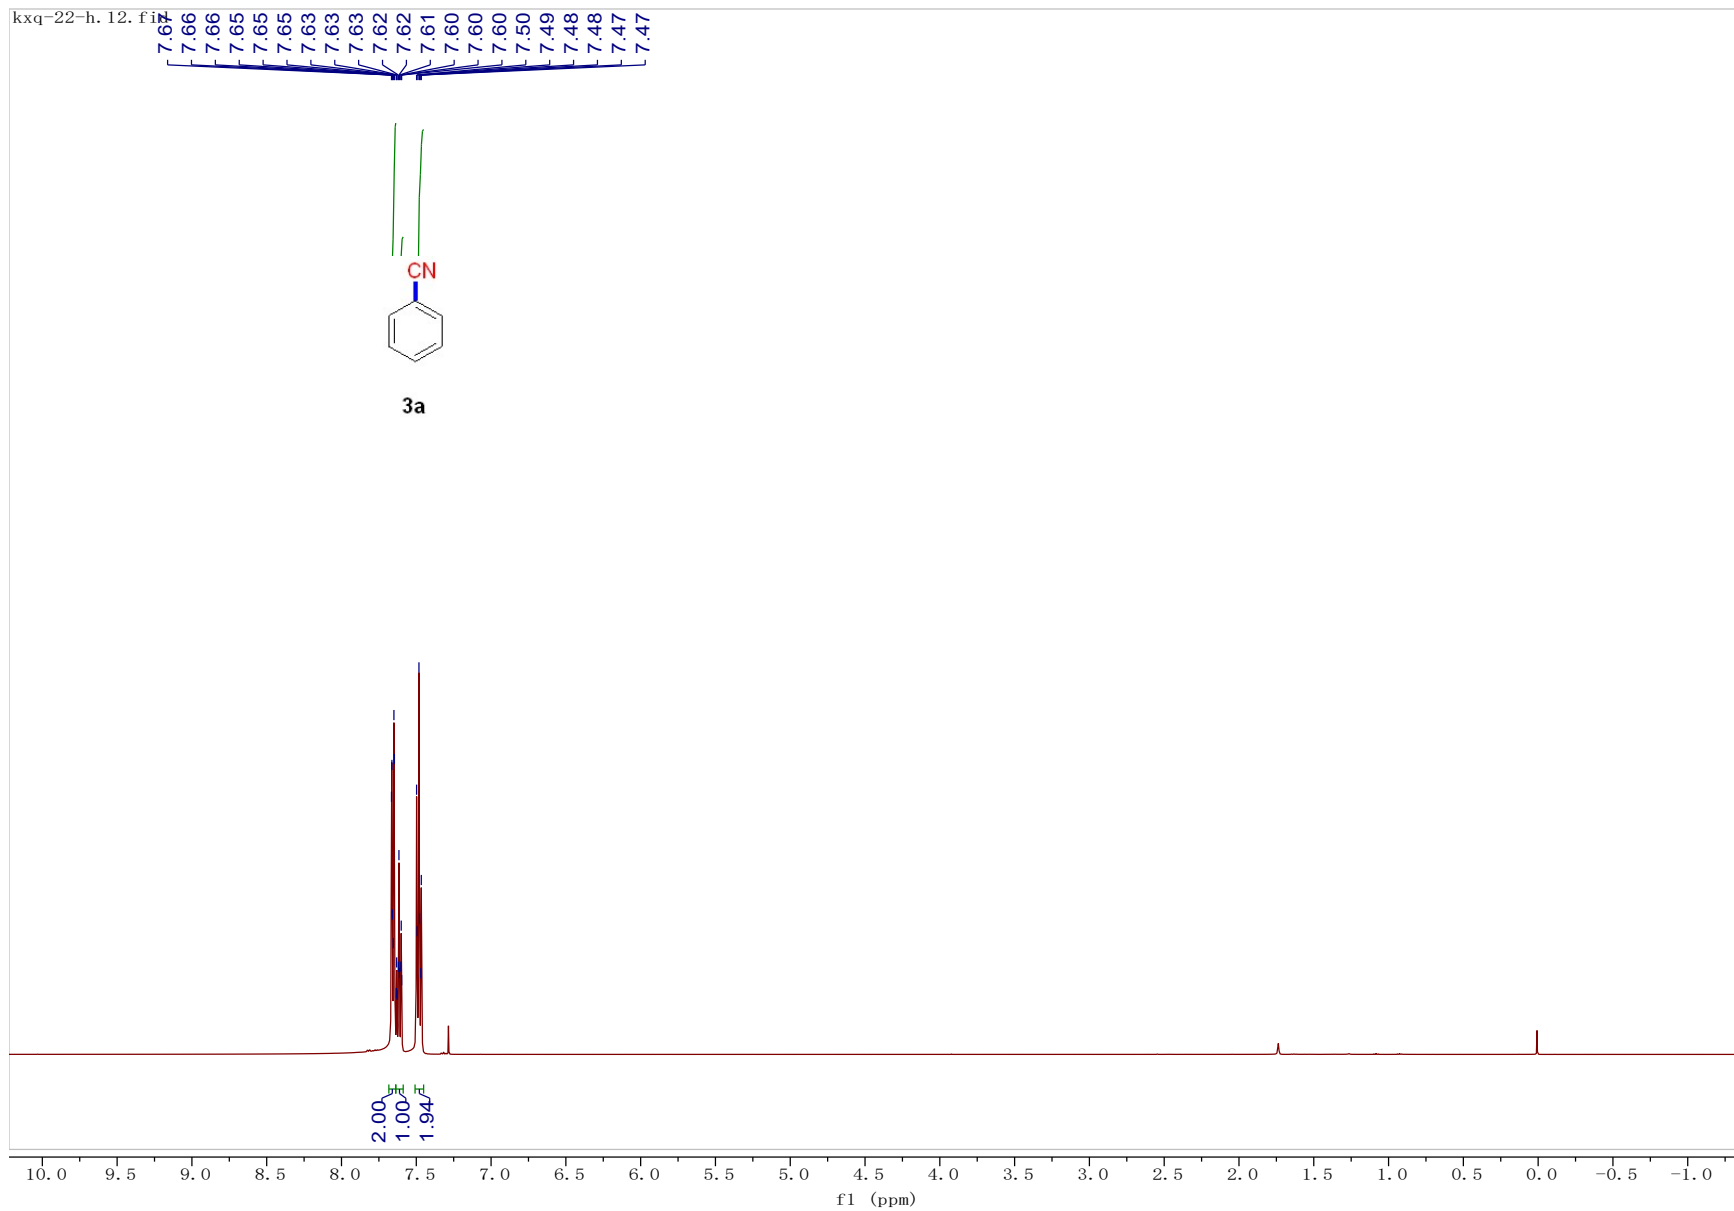

kxq-22-c13.14.fid

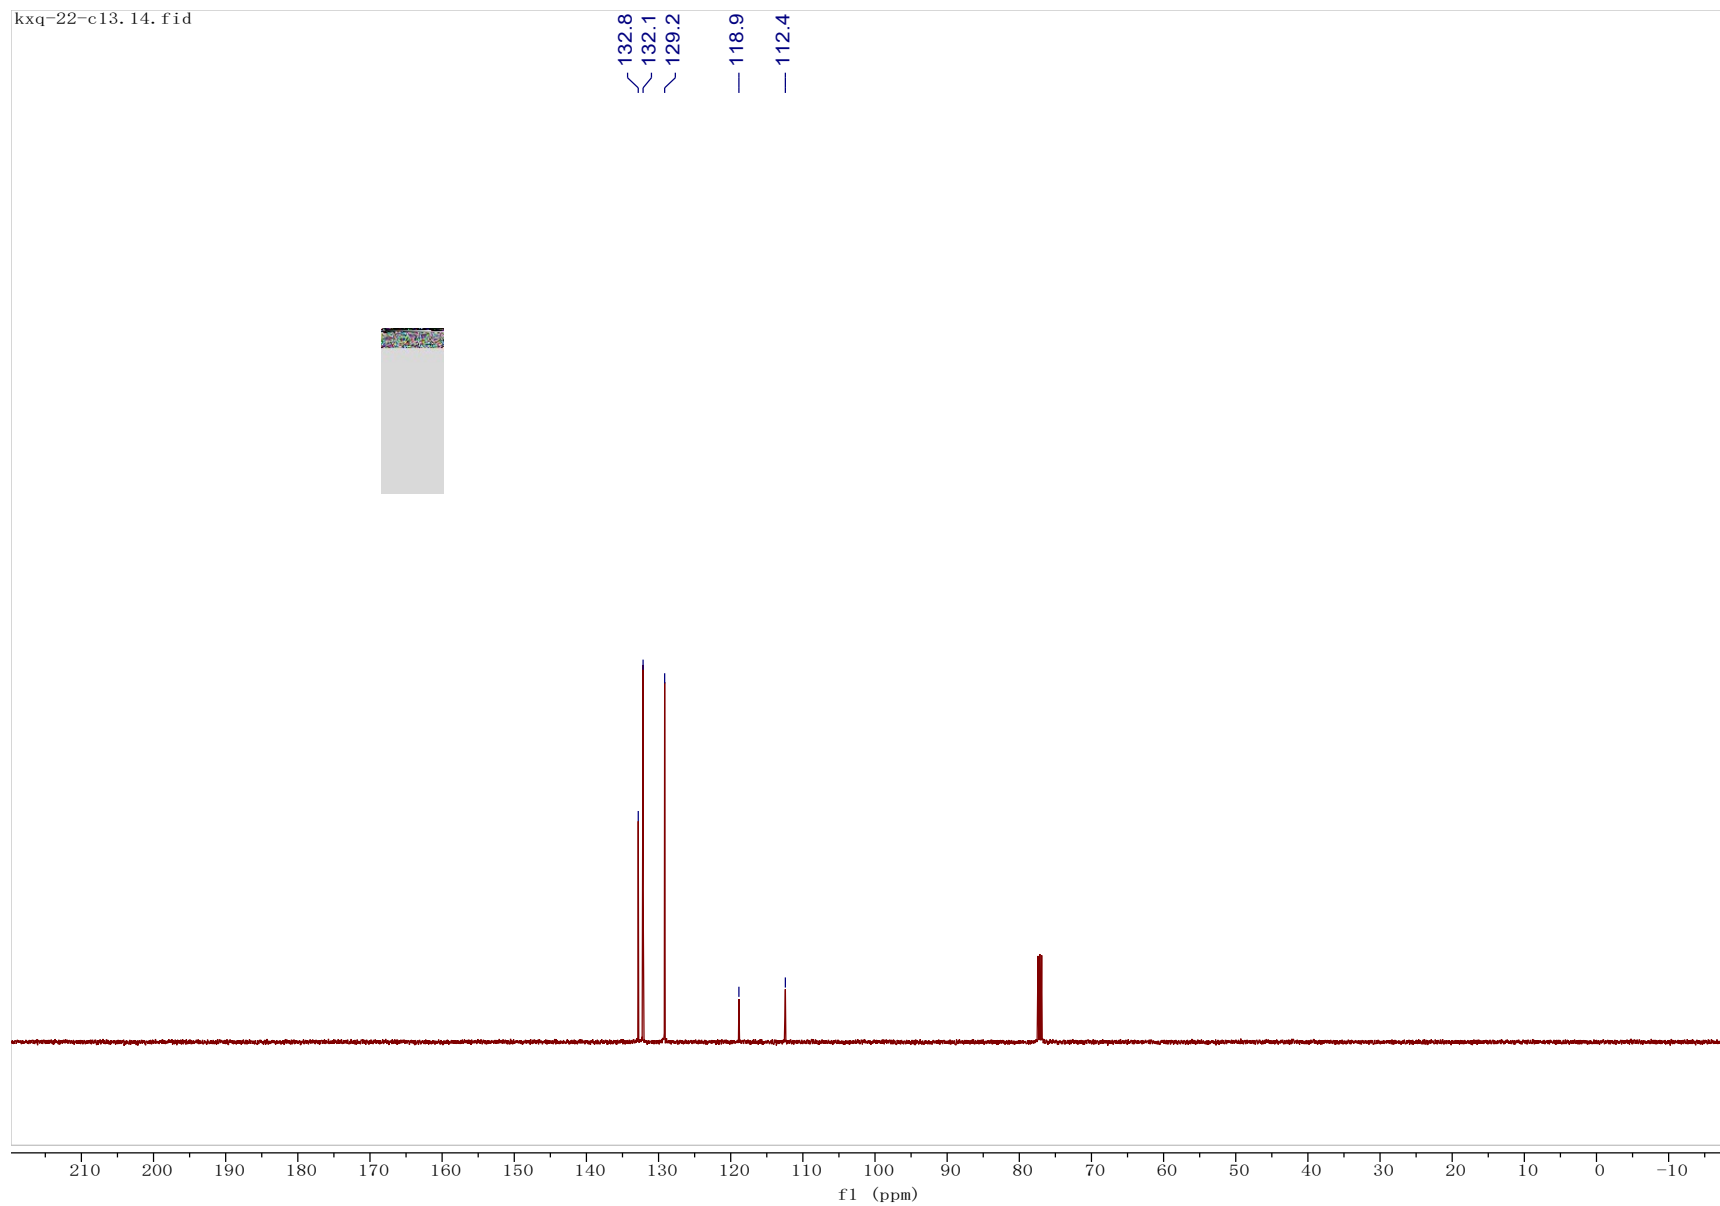



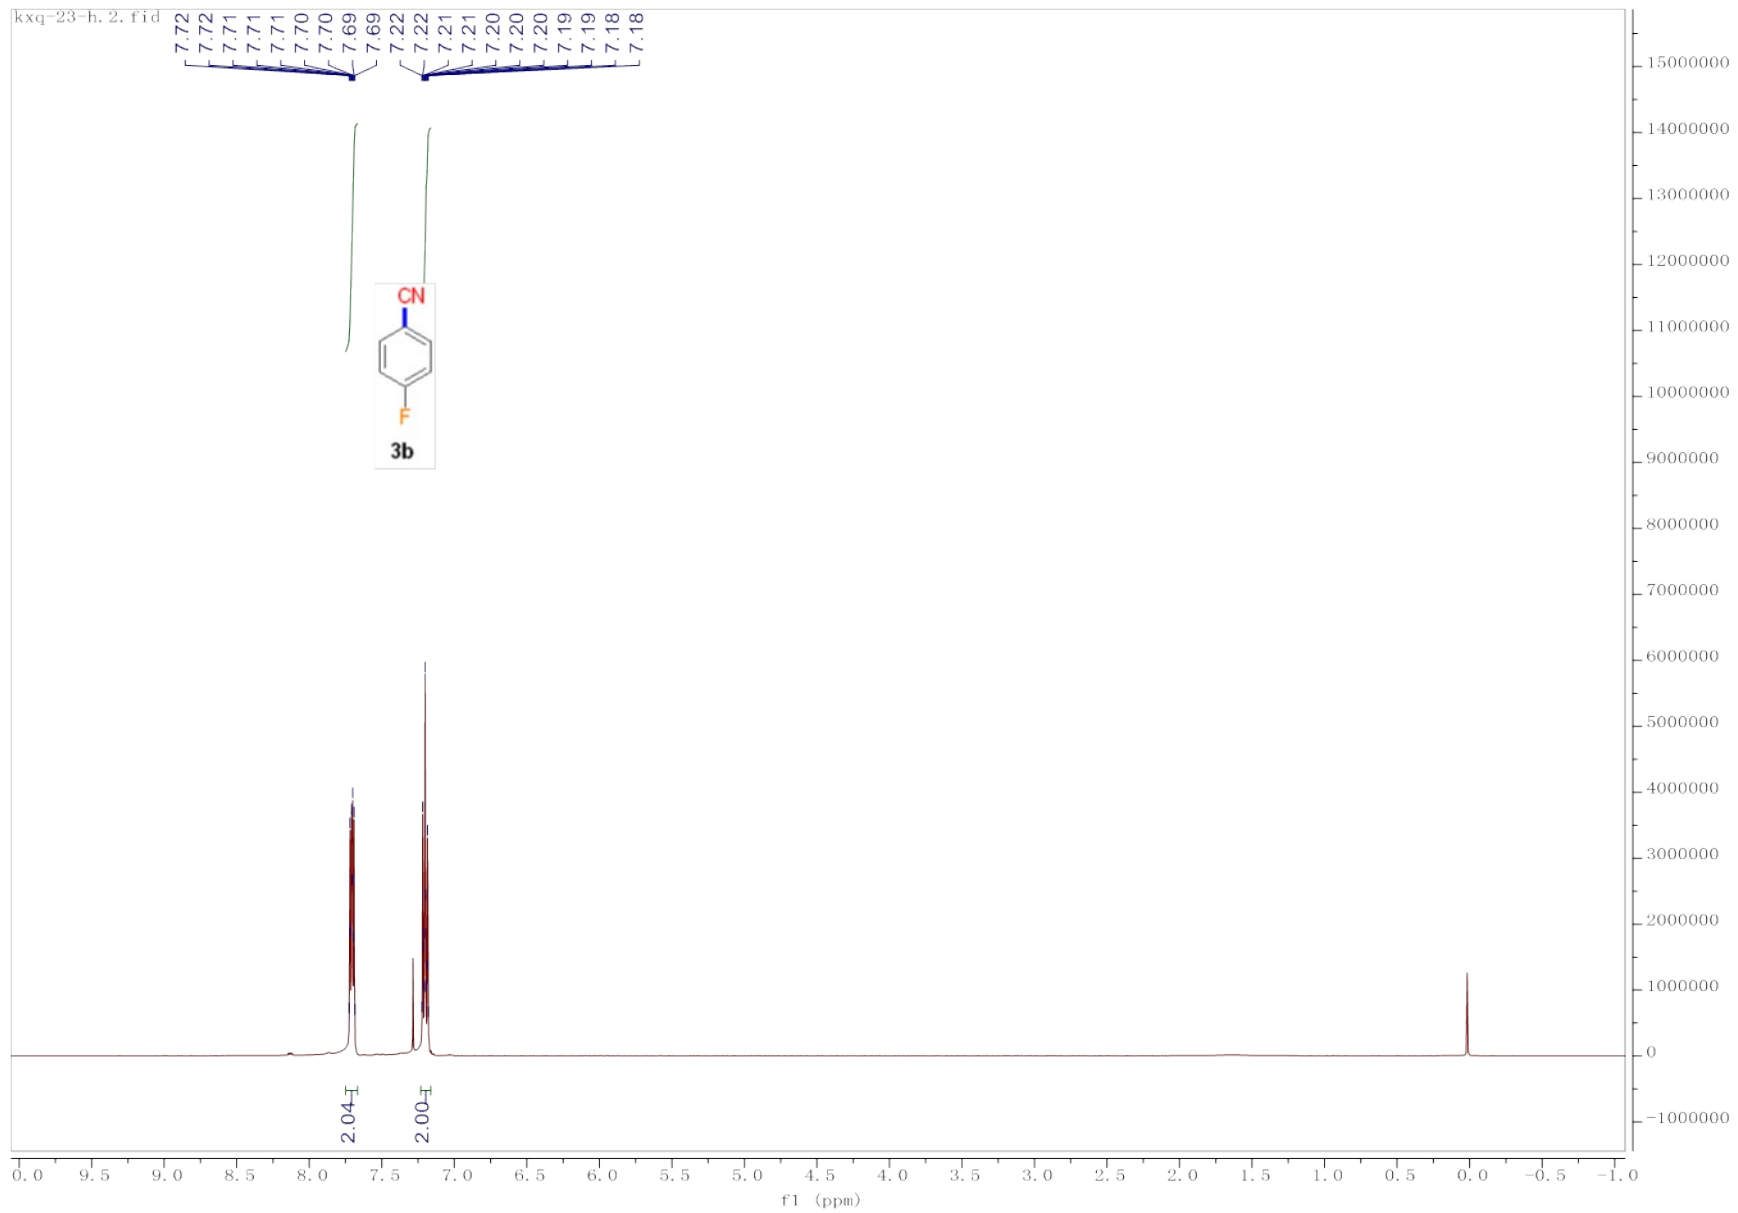

kxq-23-c13. 3. fid

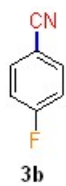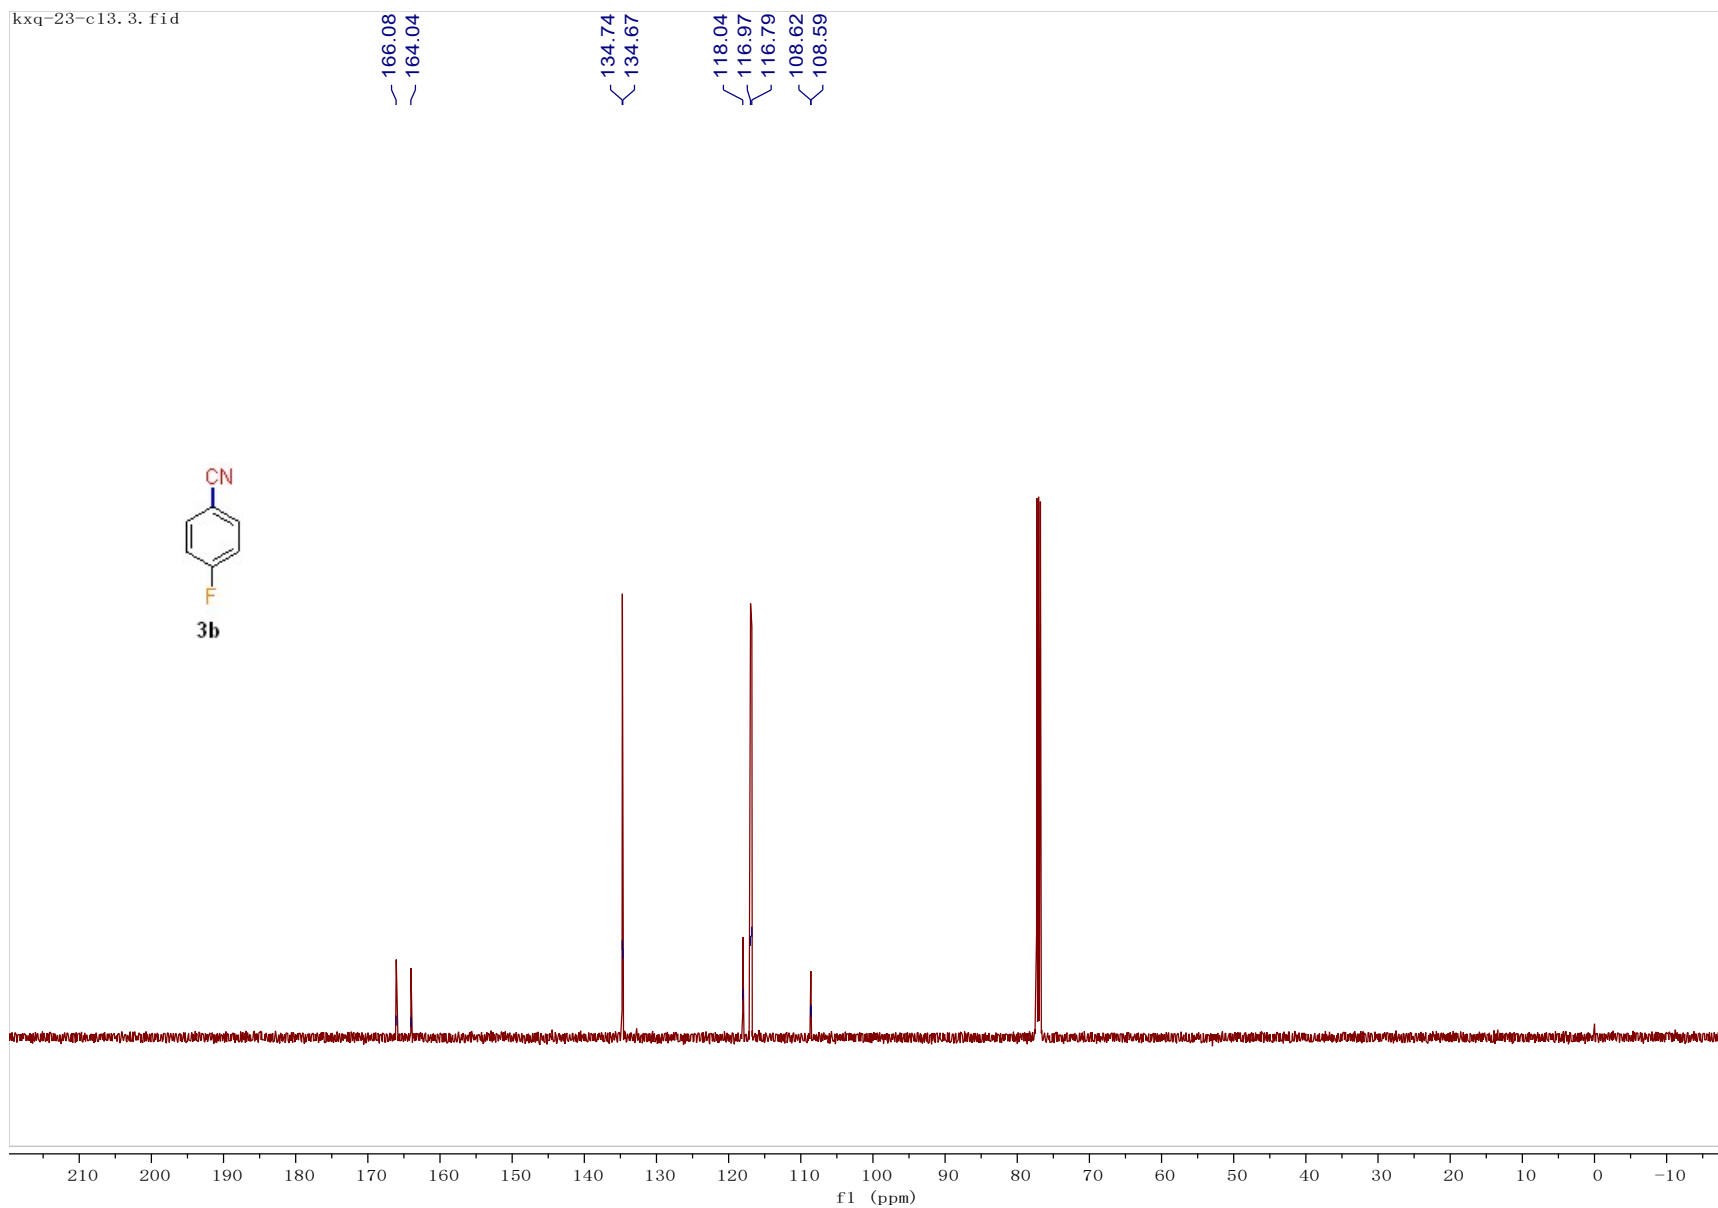

kxq-23-f19.4.fid

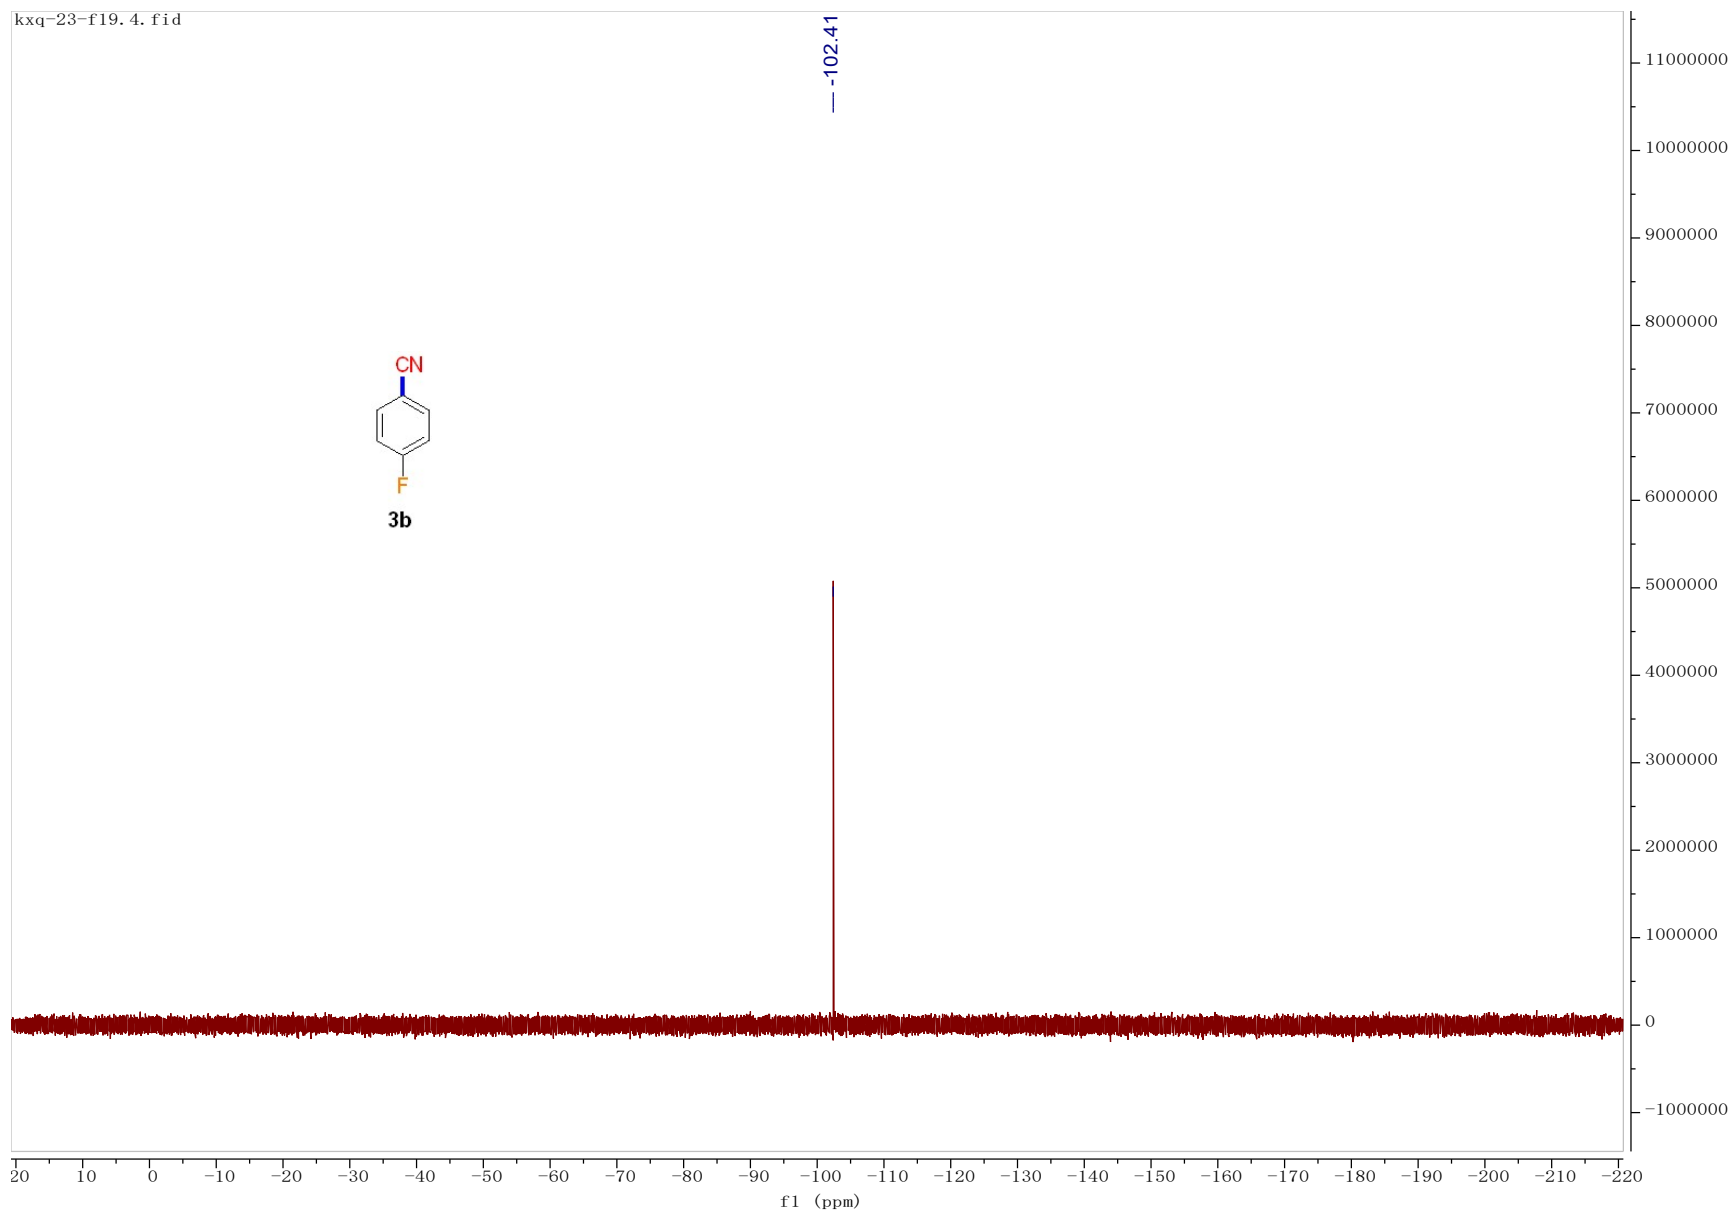

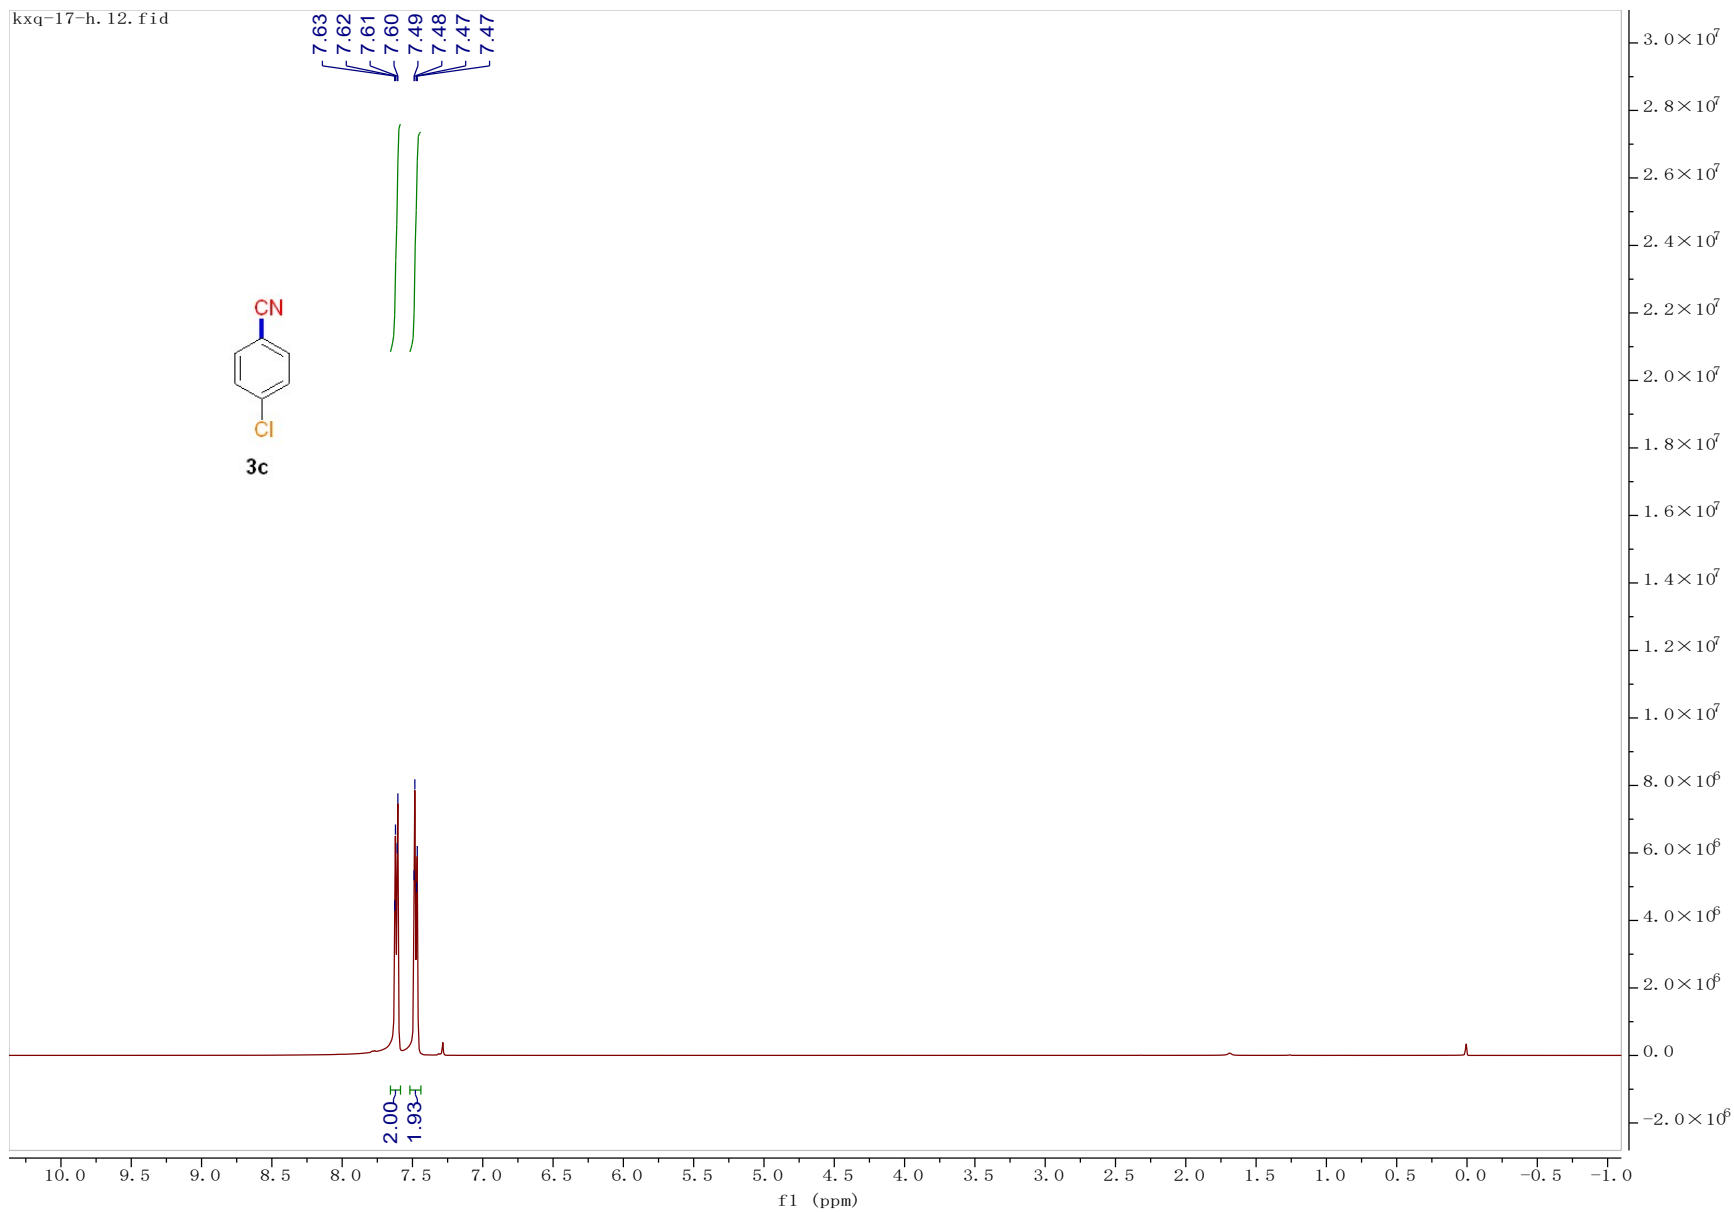

kxq-17-c13.13.fid

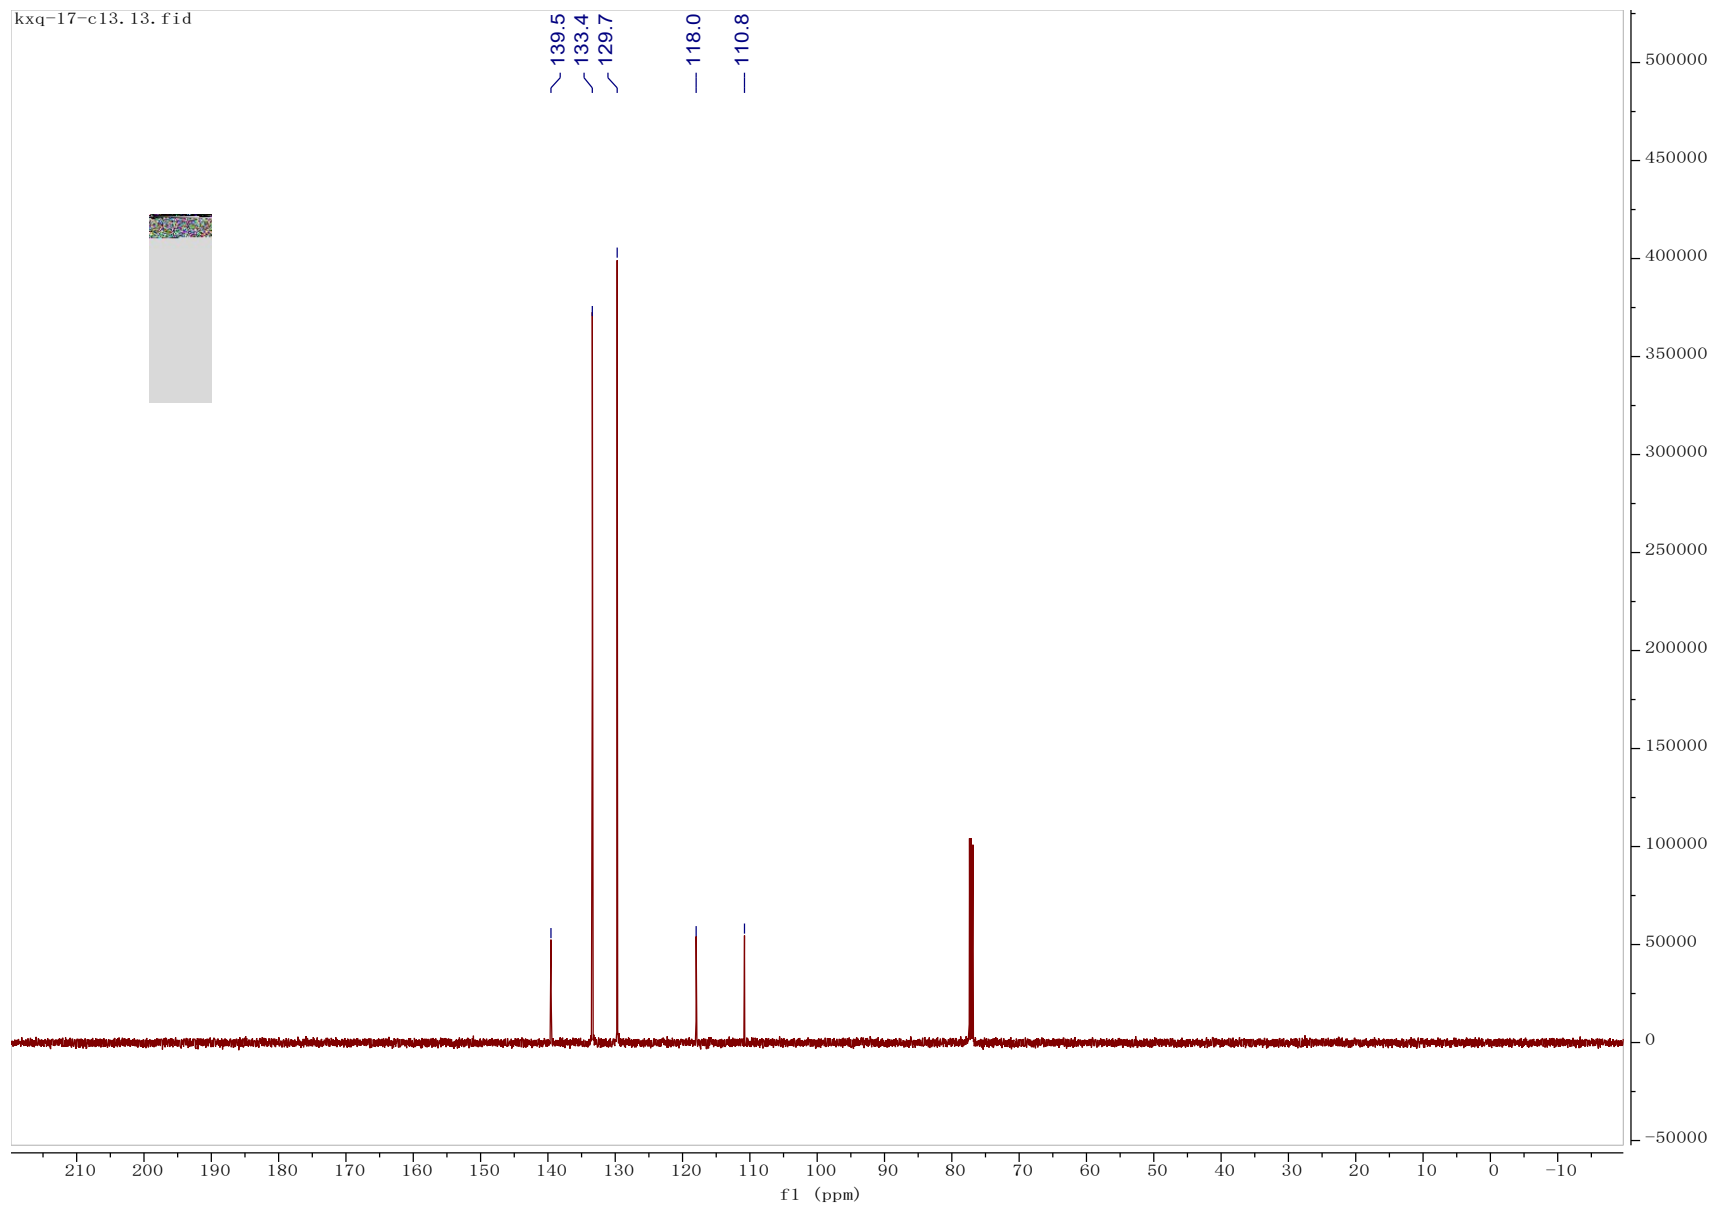

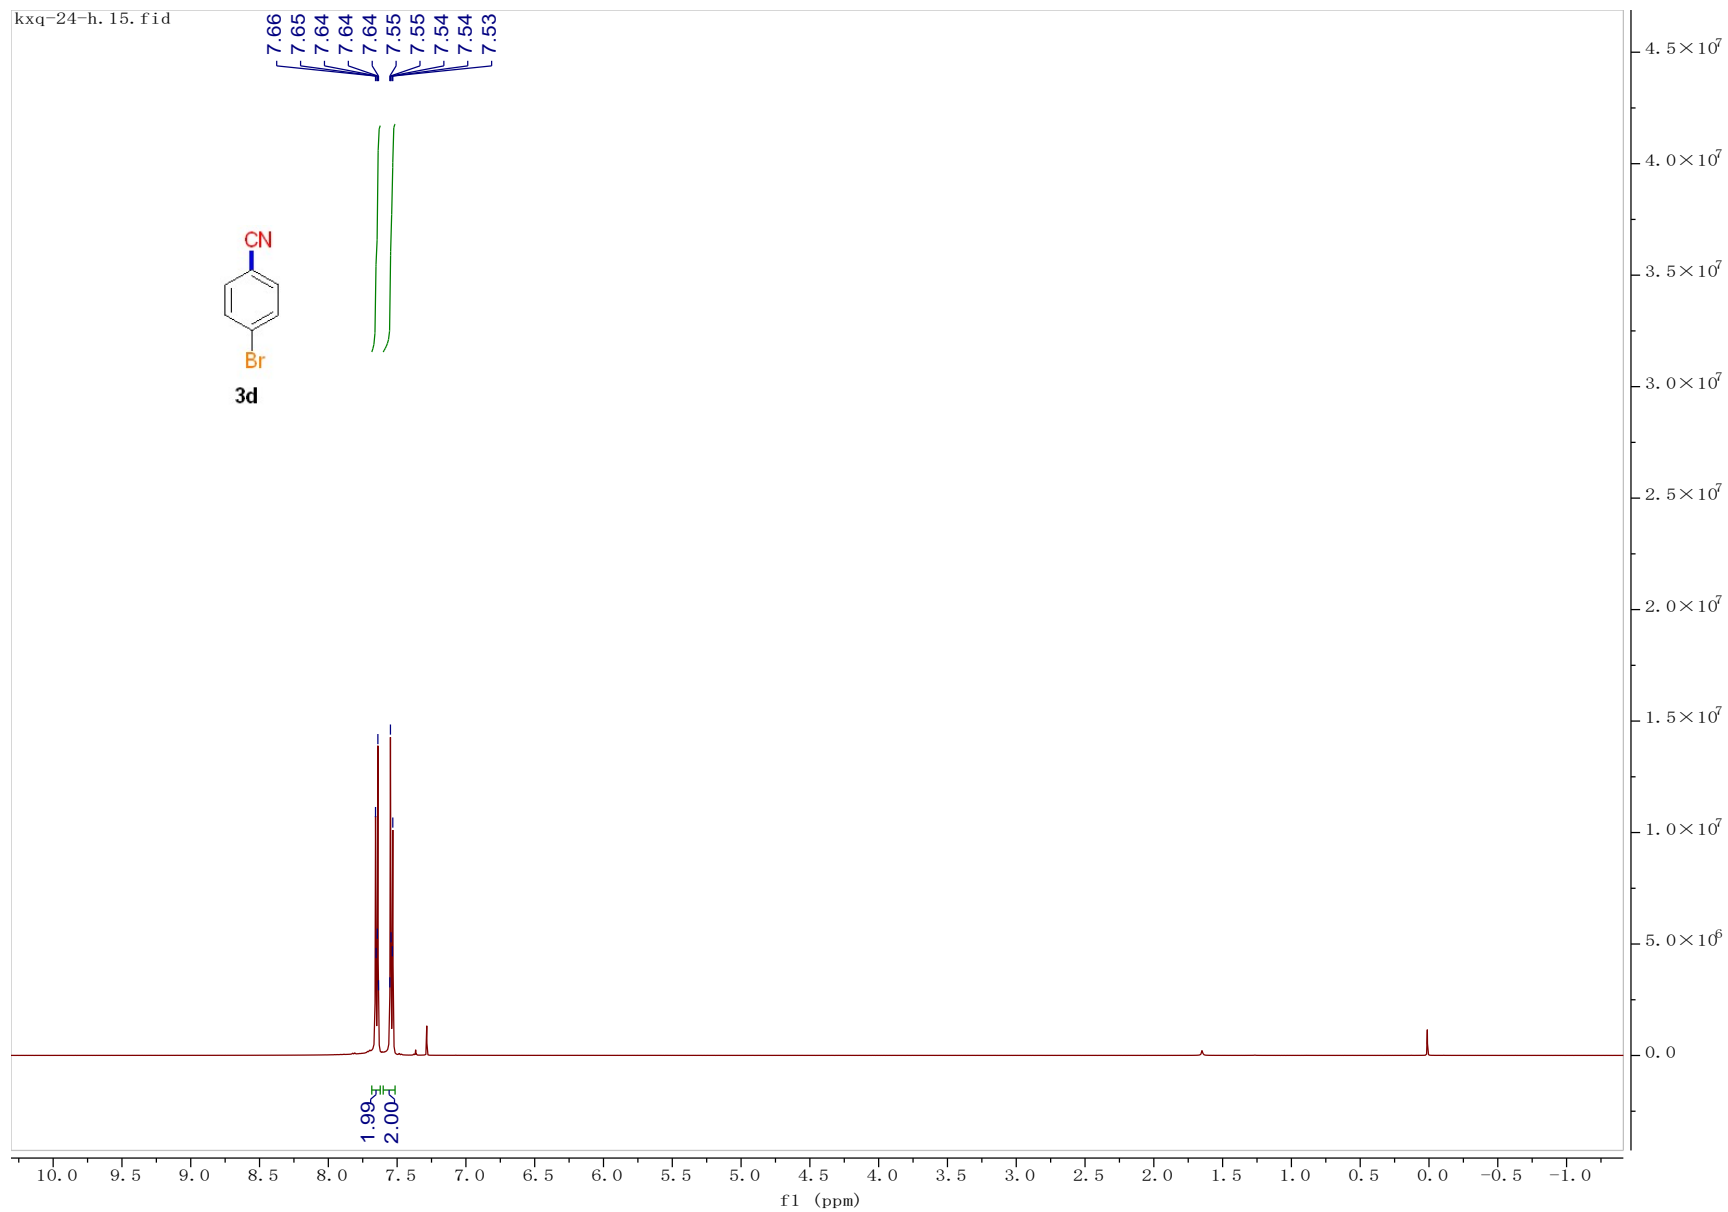

kxq-24-c13.16.fid

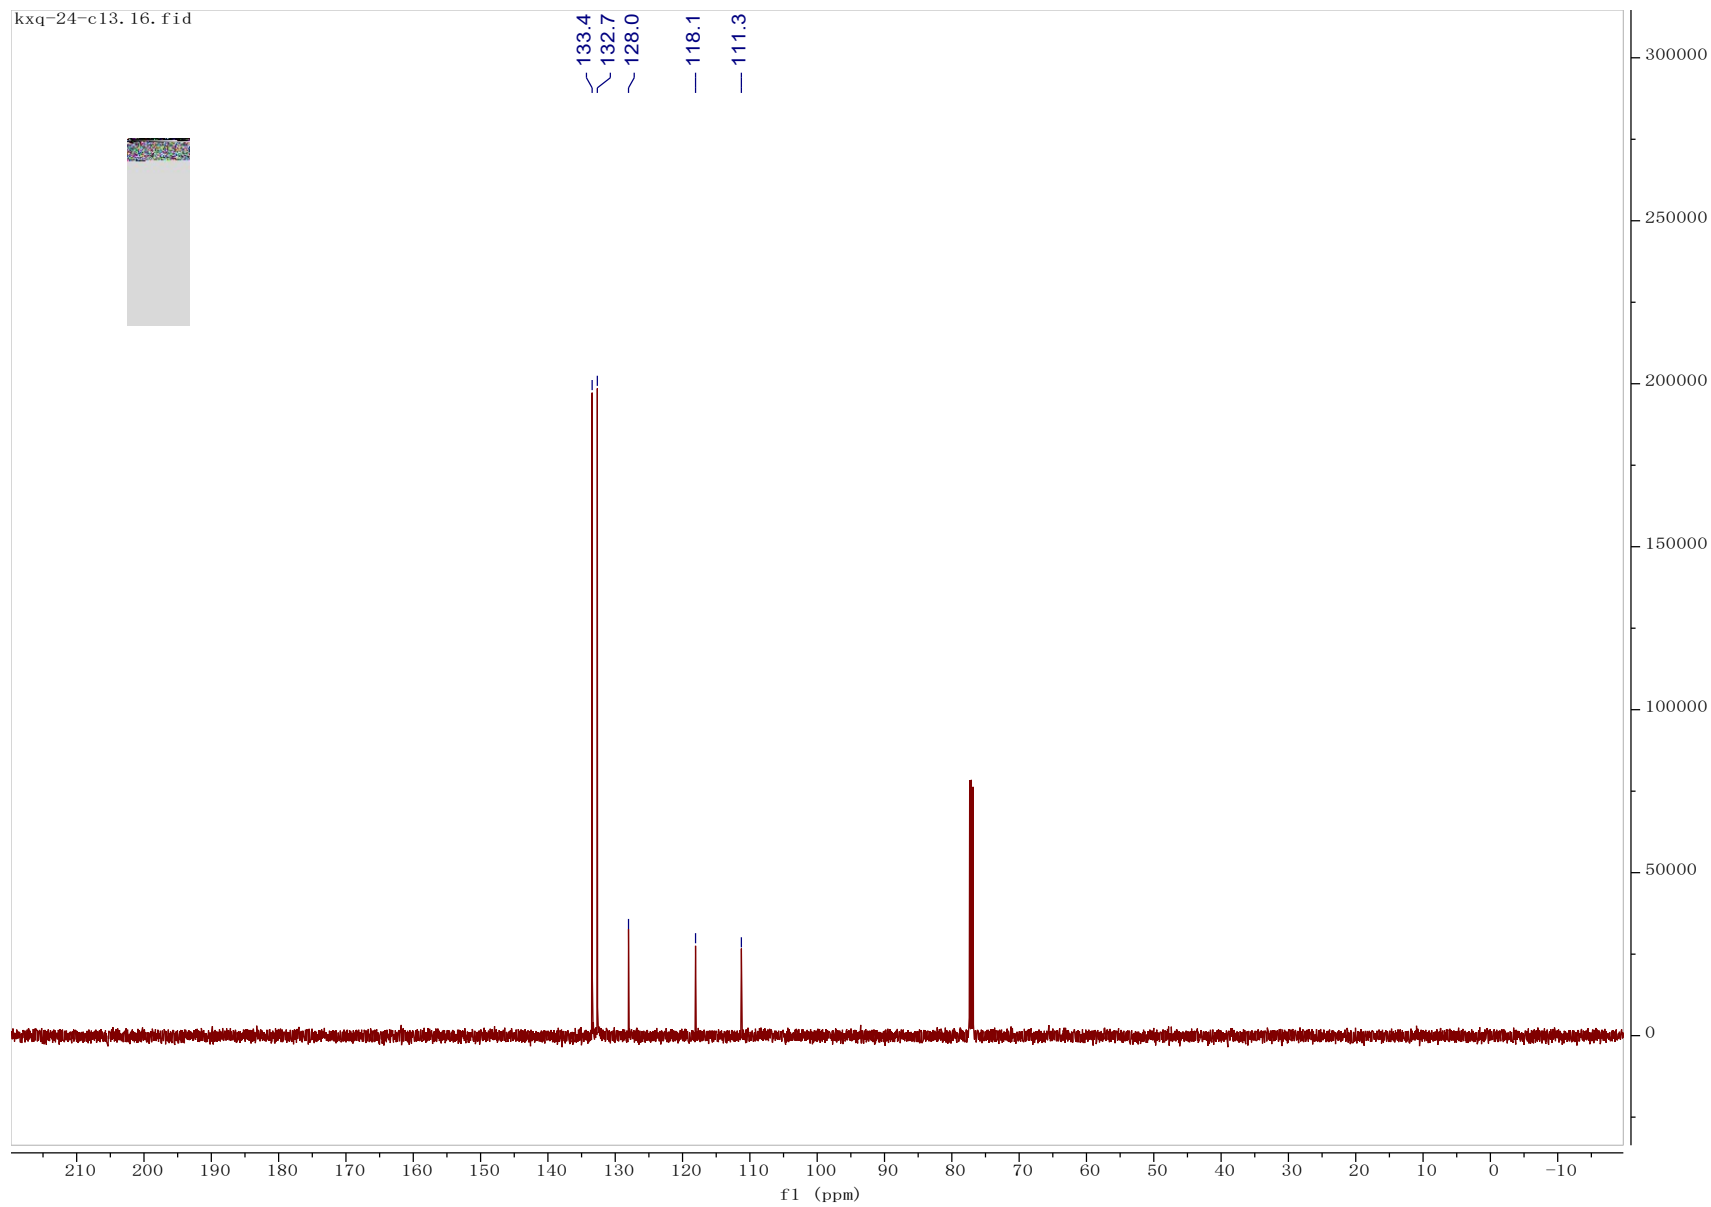

kxq-14-h. 10. fid

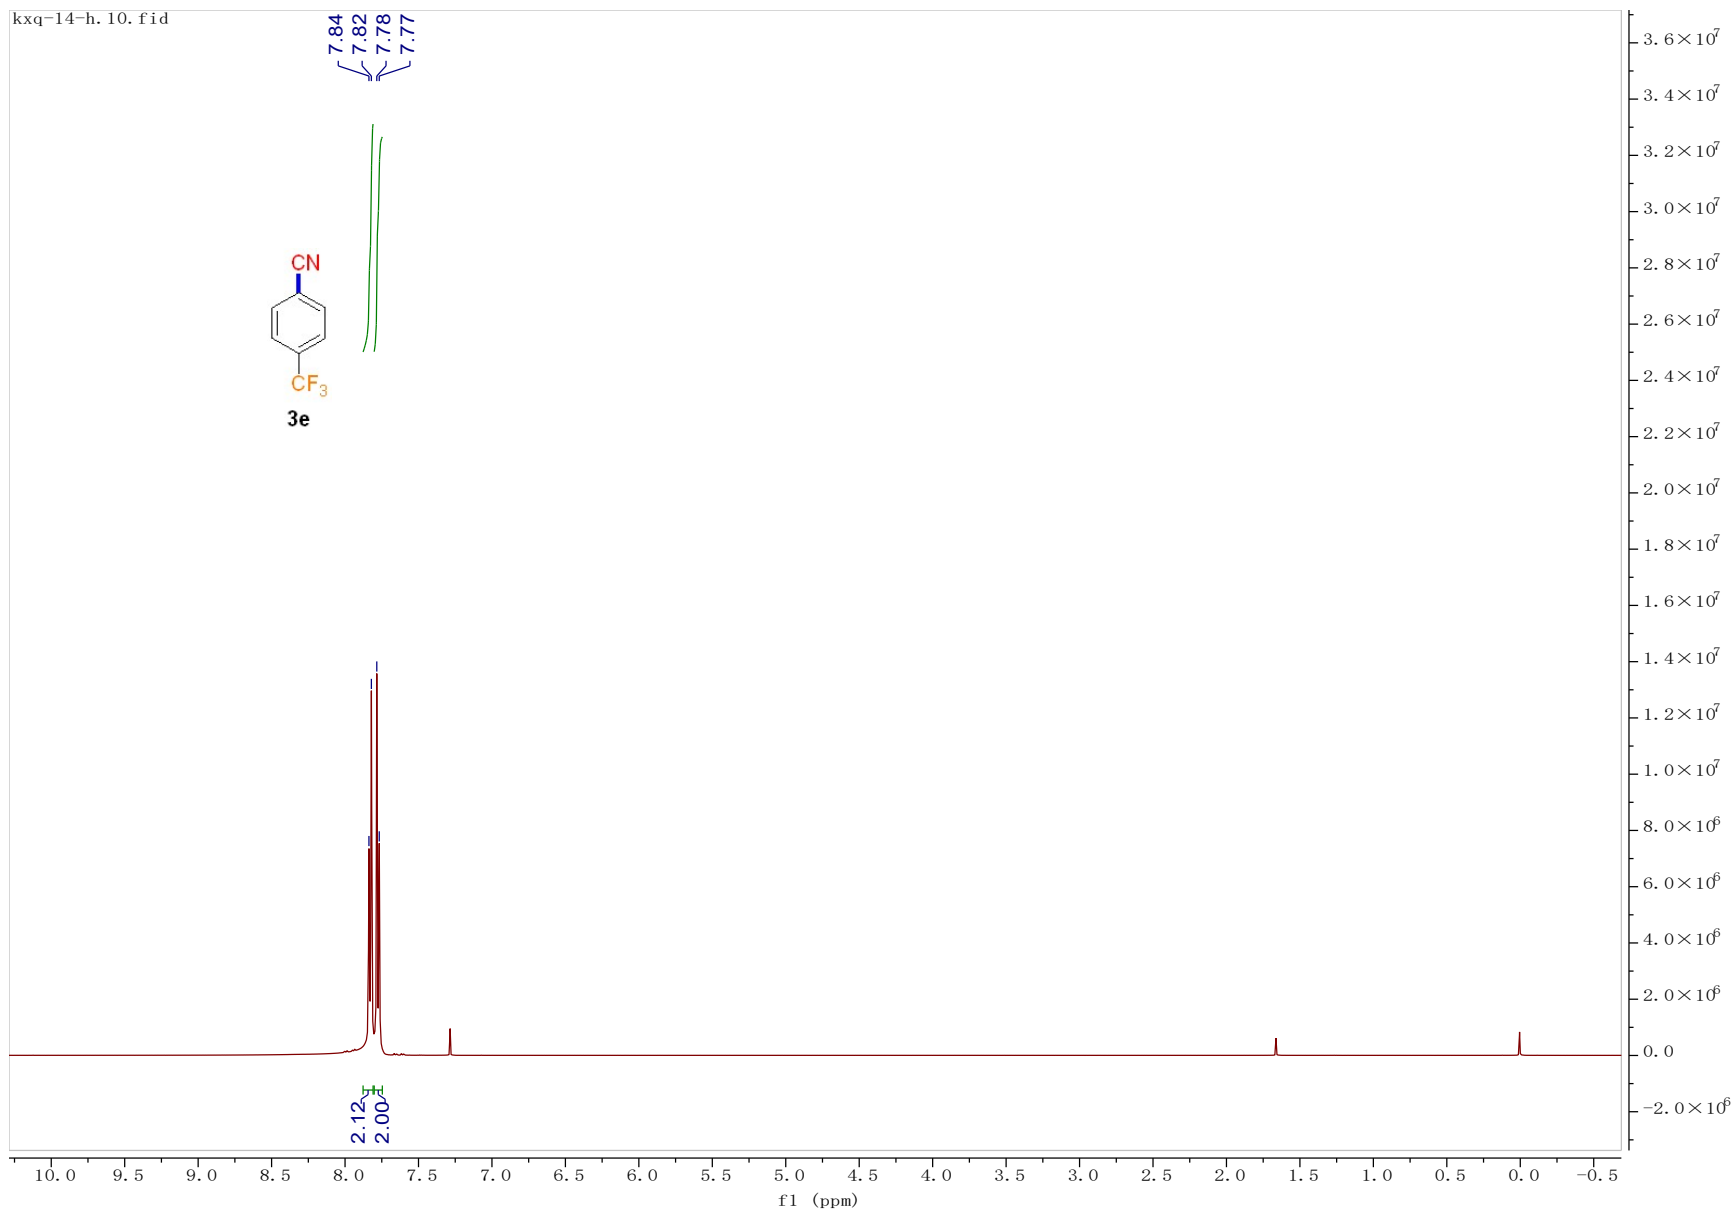



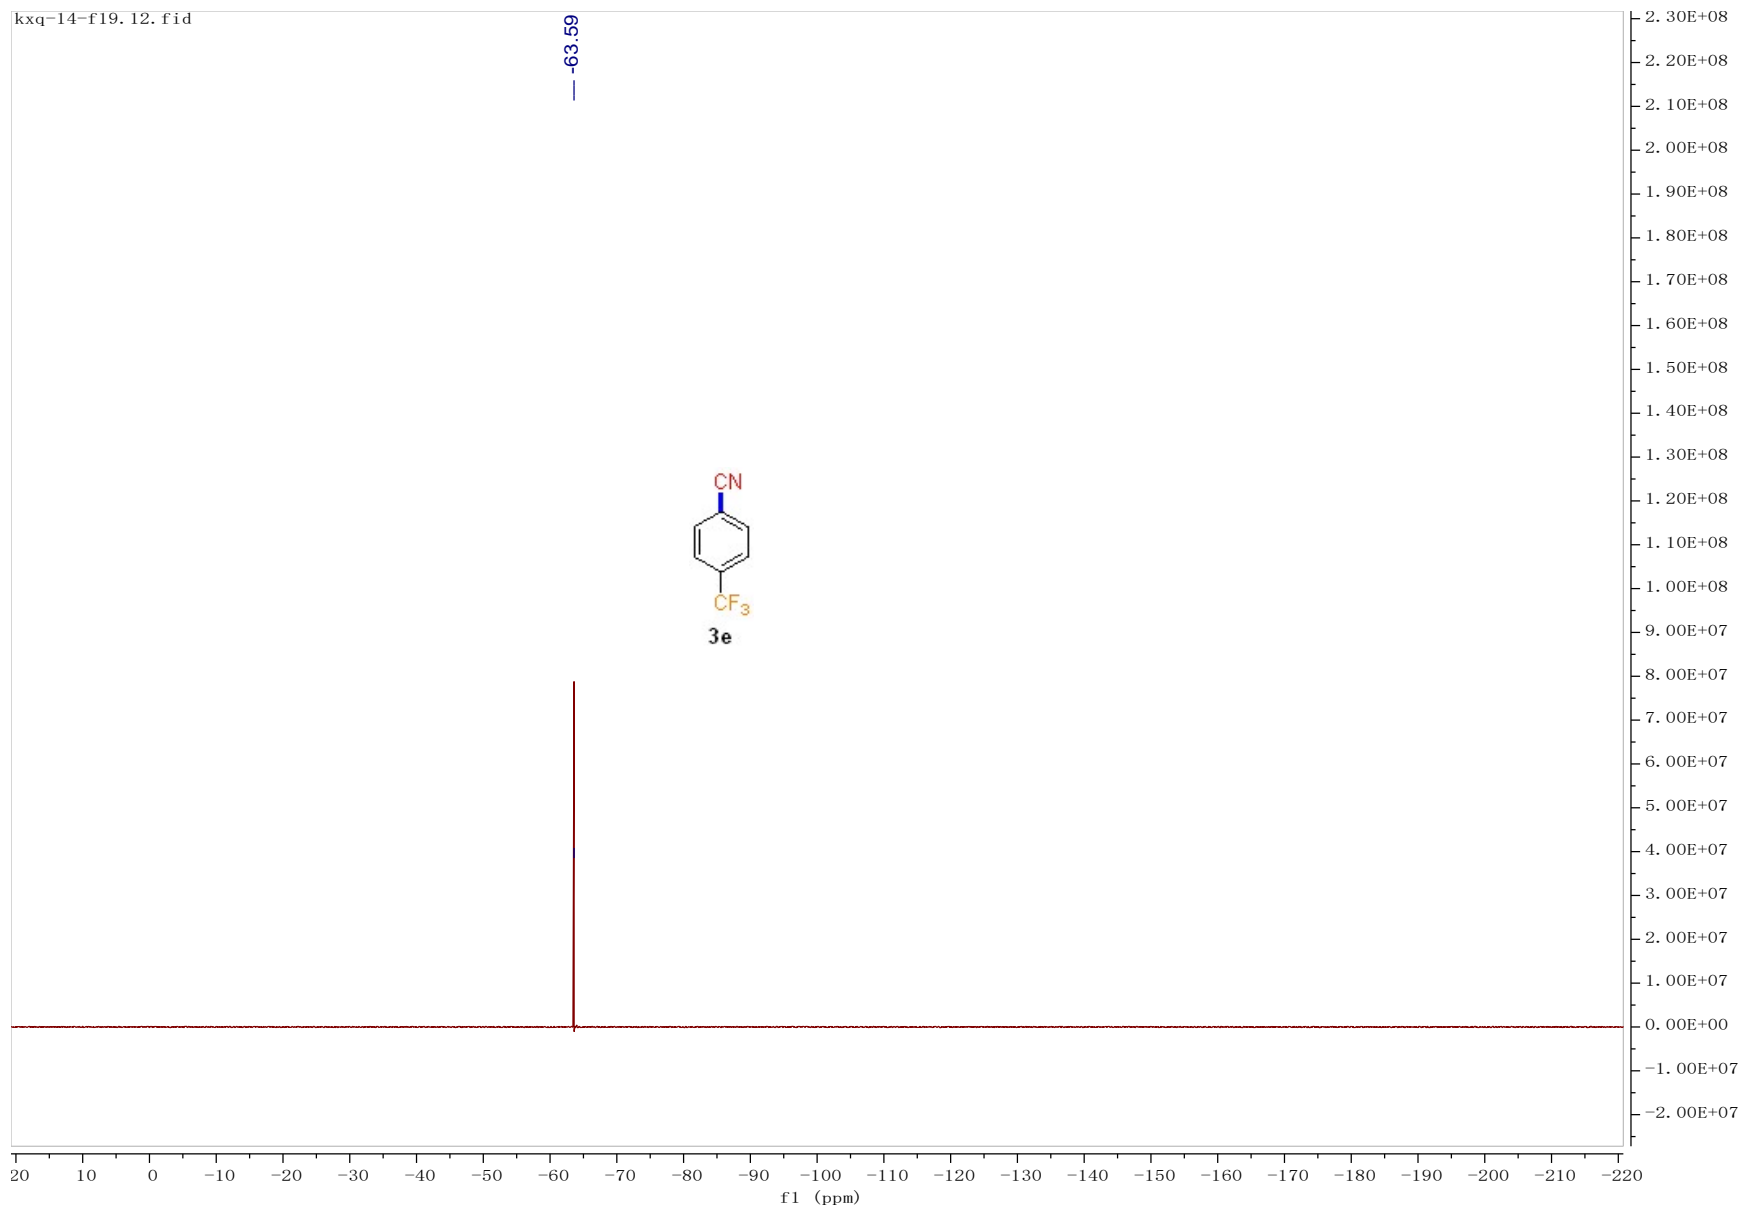

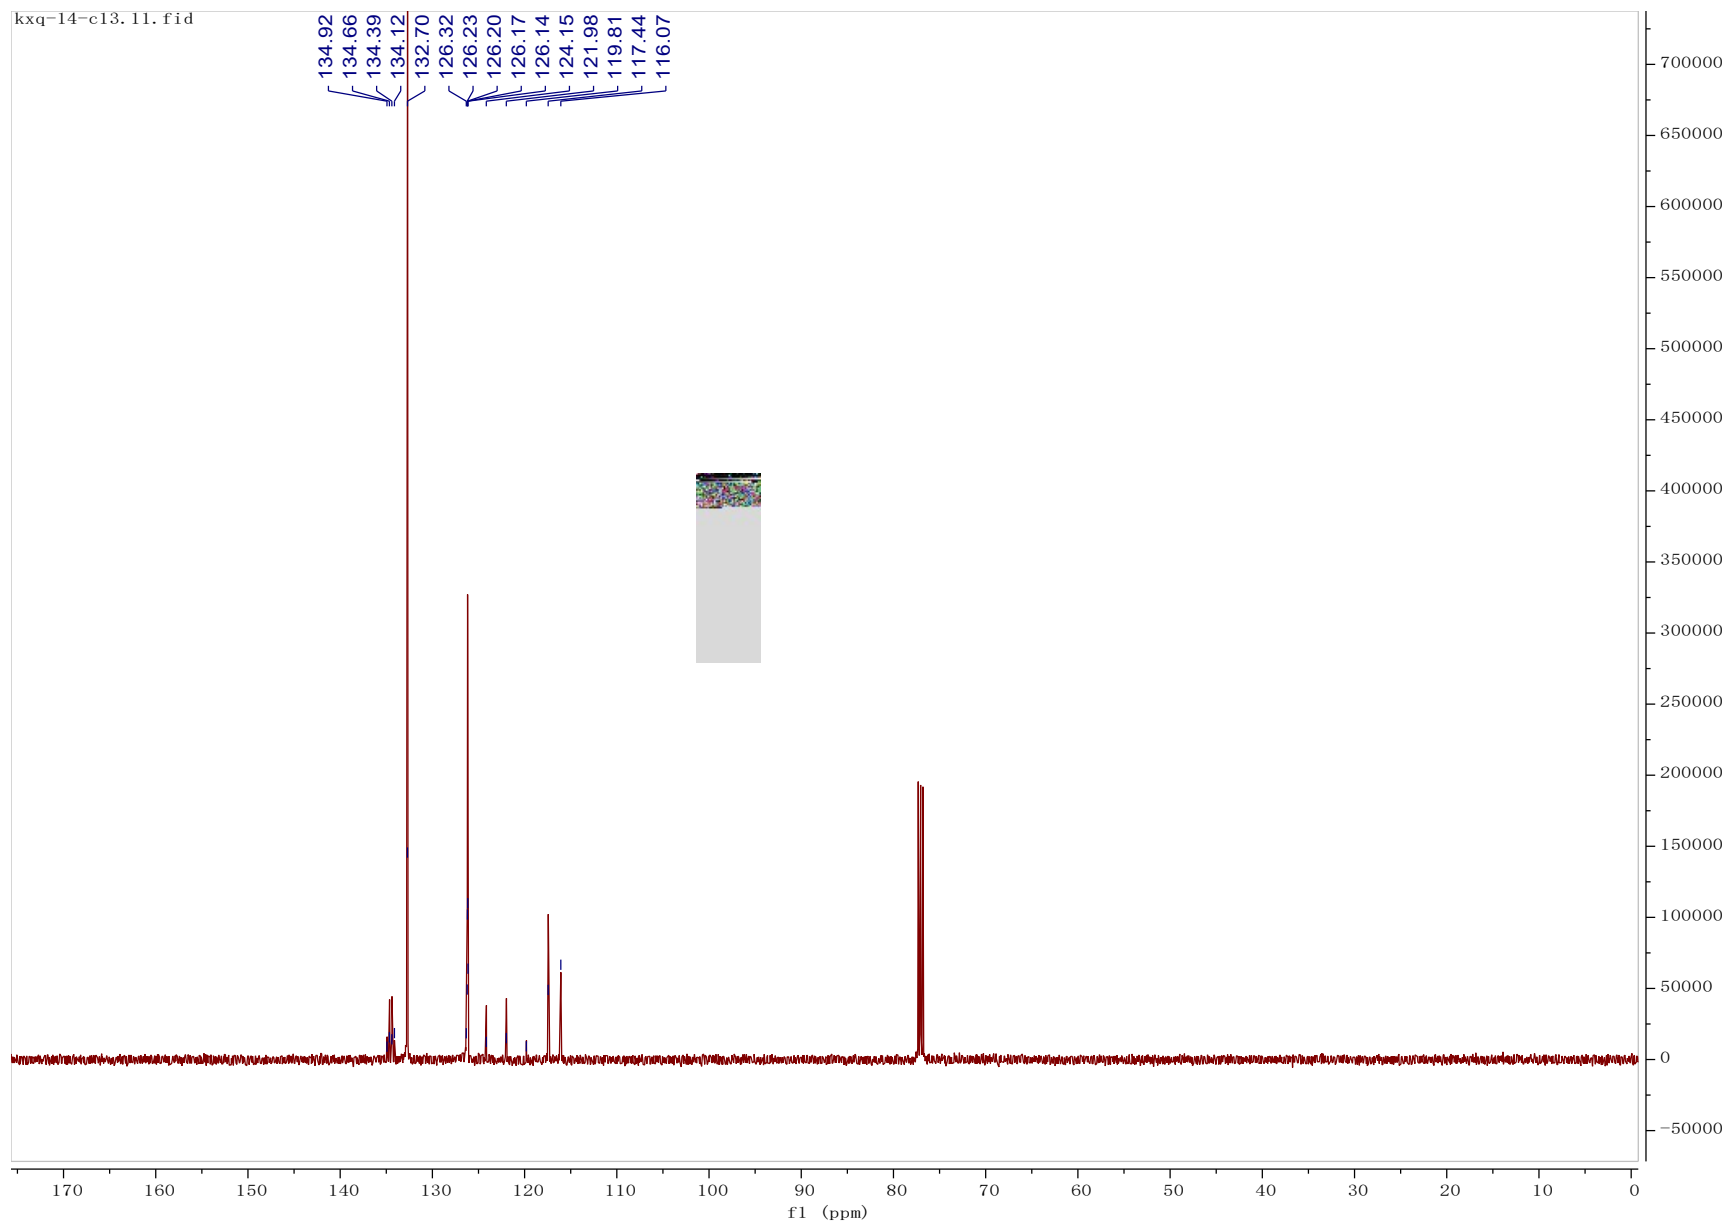

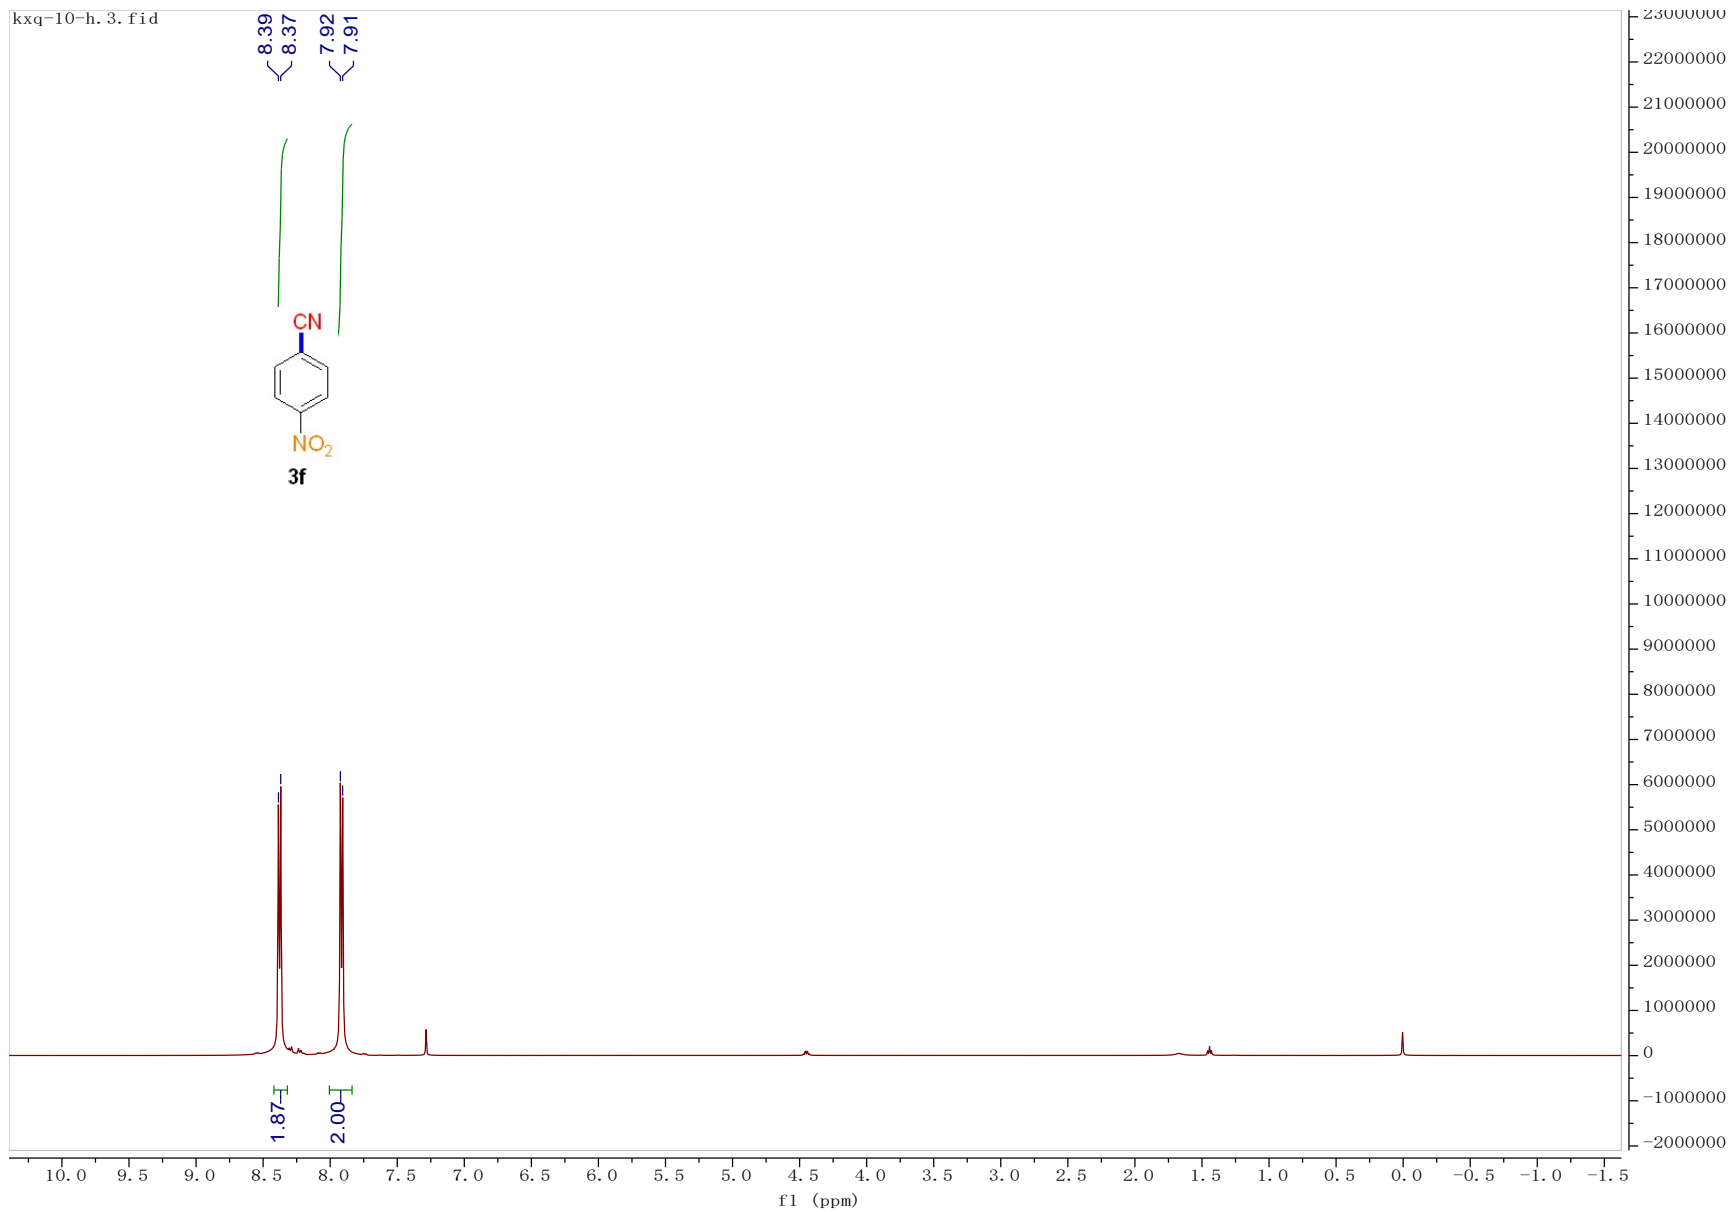

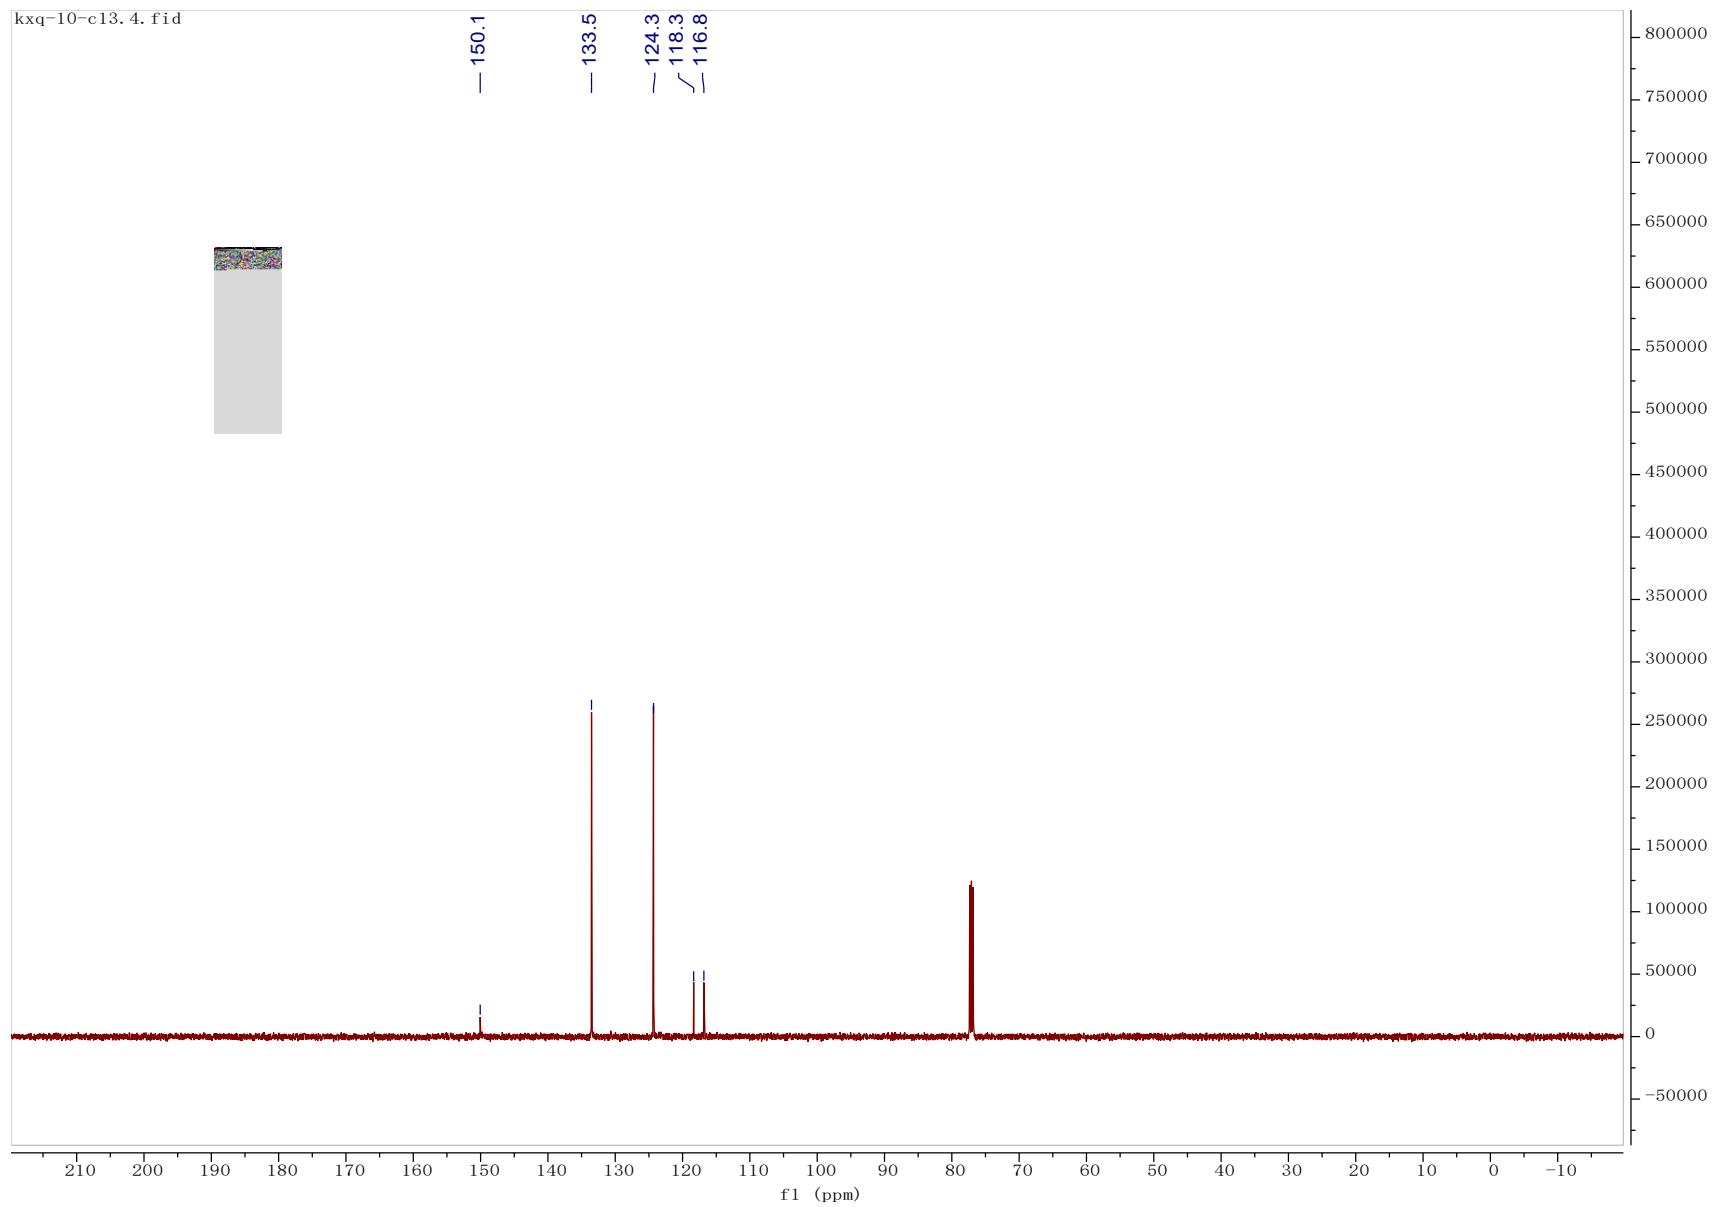

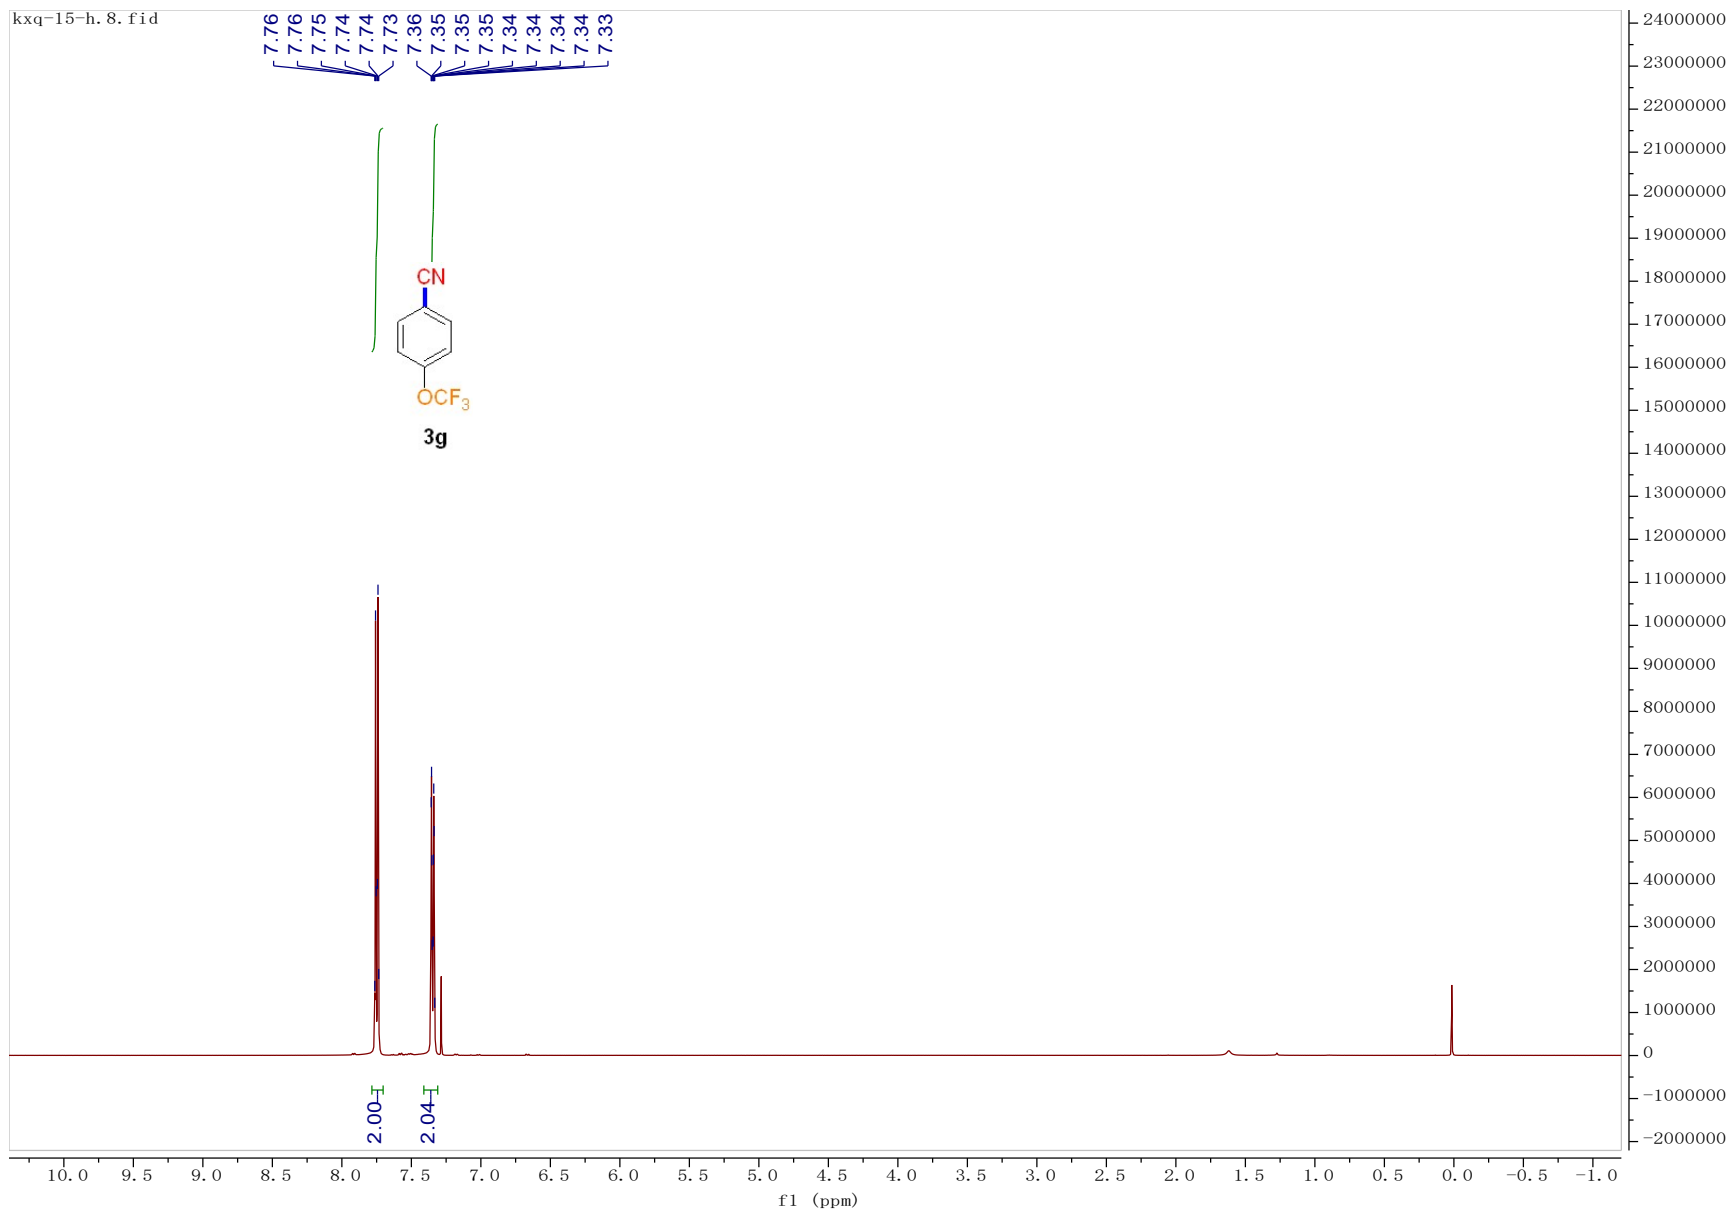

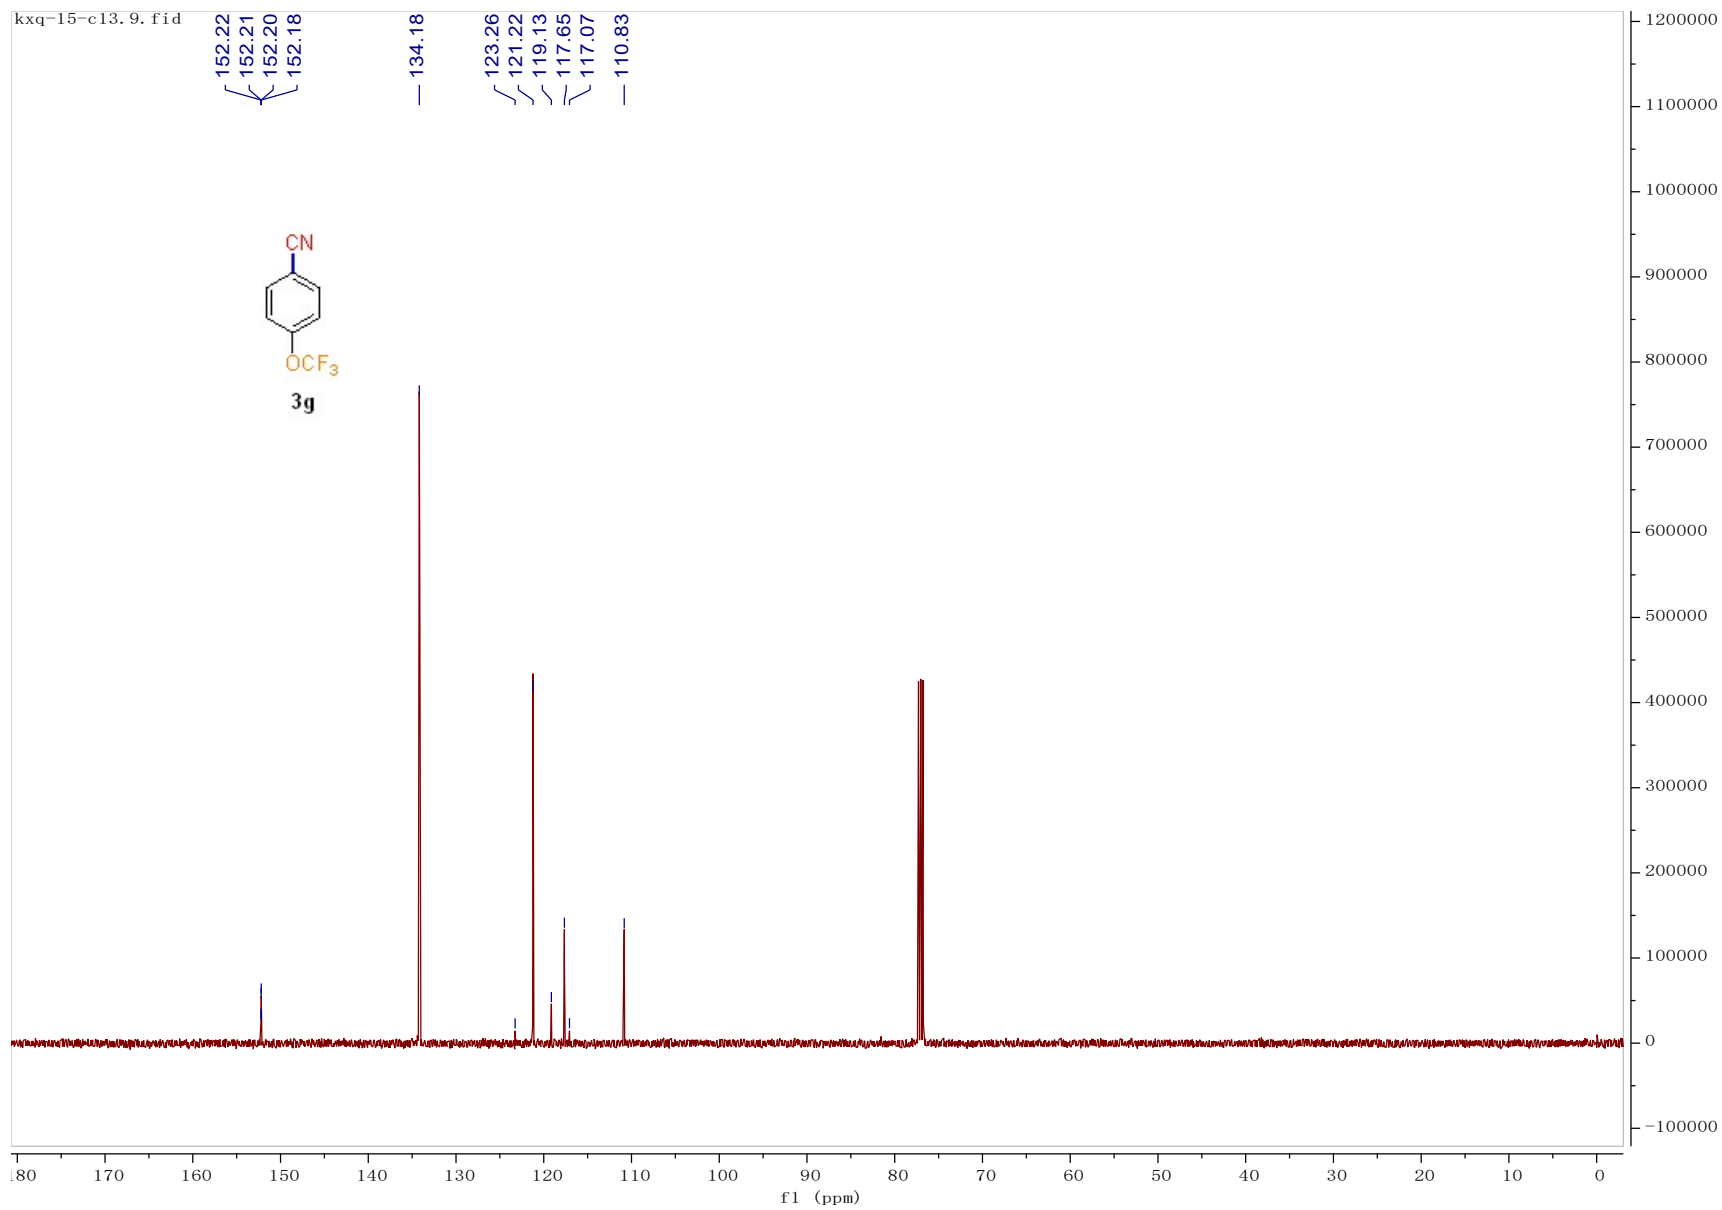

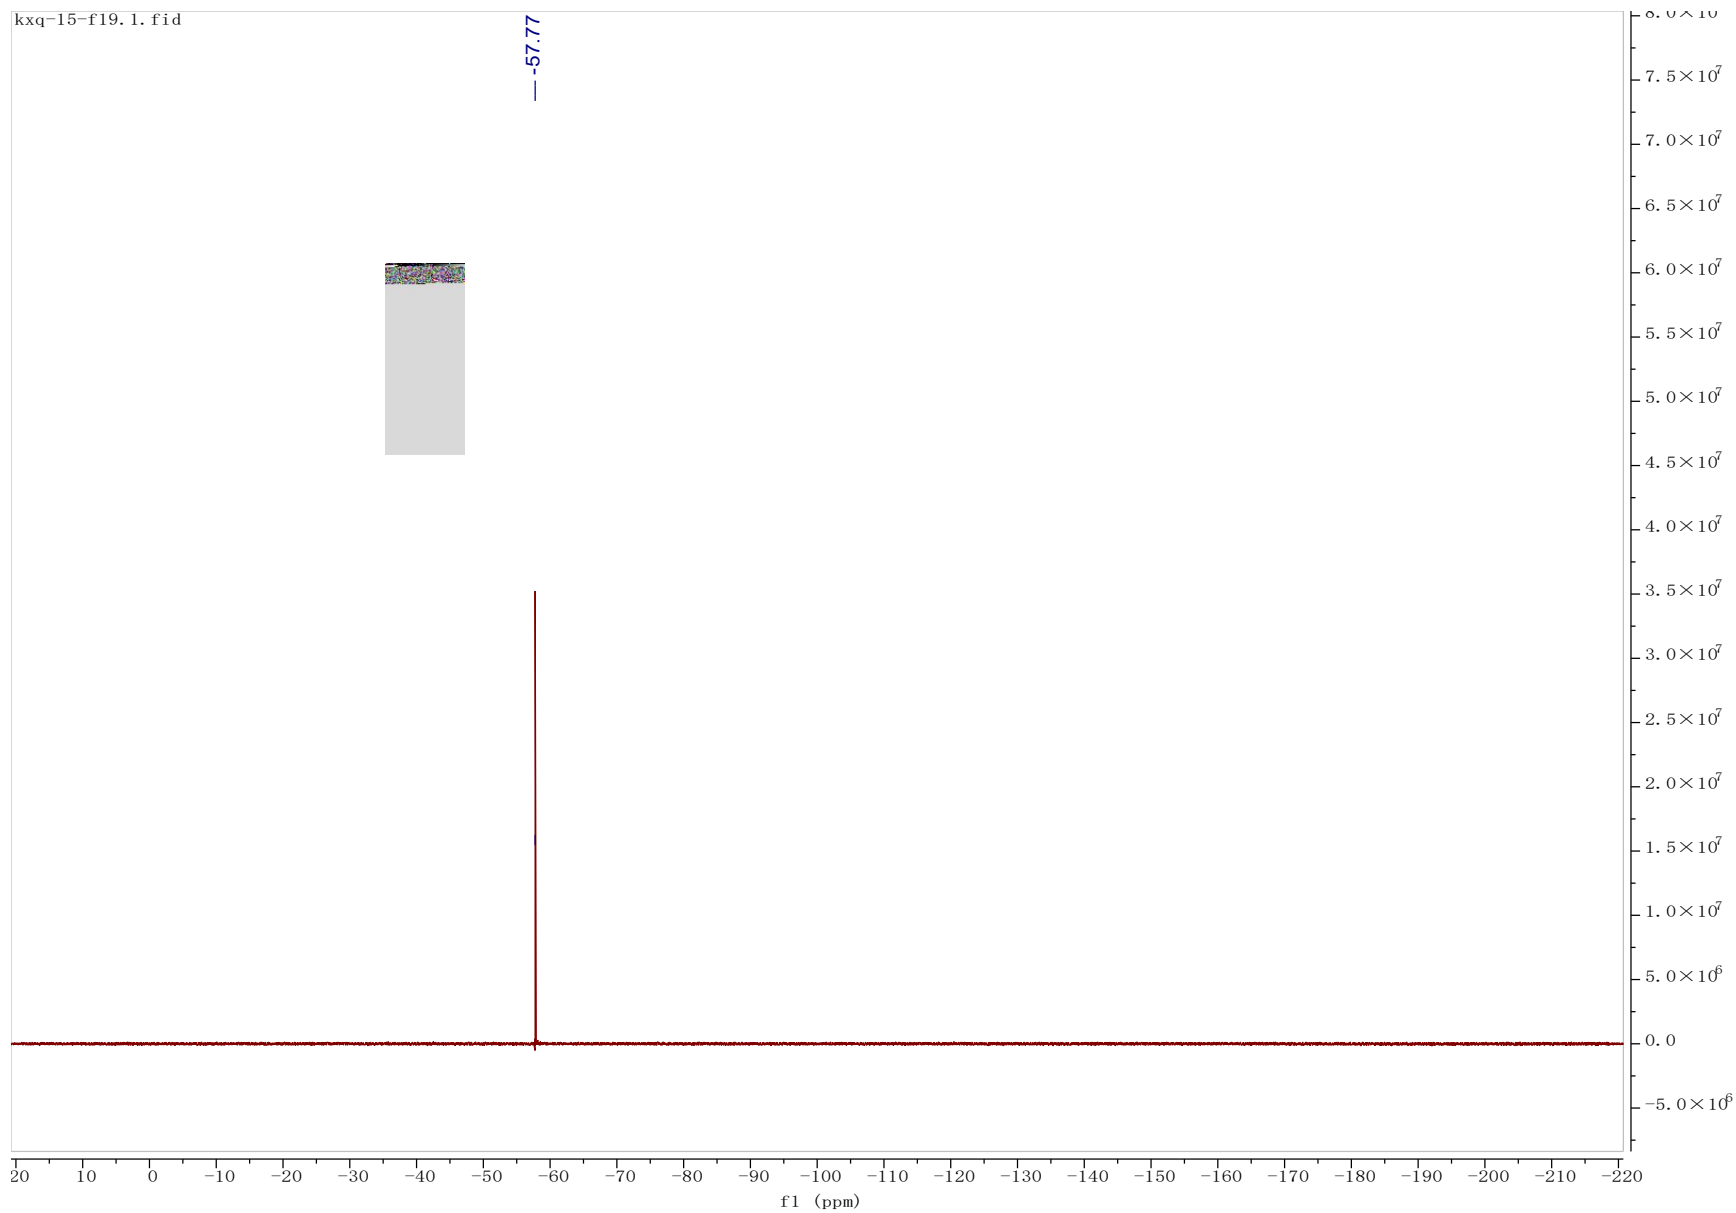

kxq-07-h. 16. fid

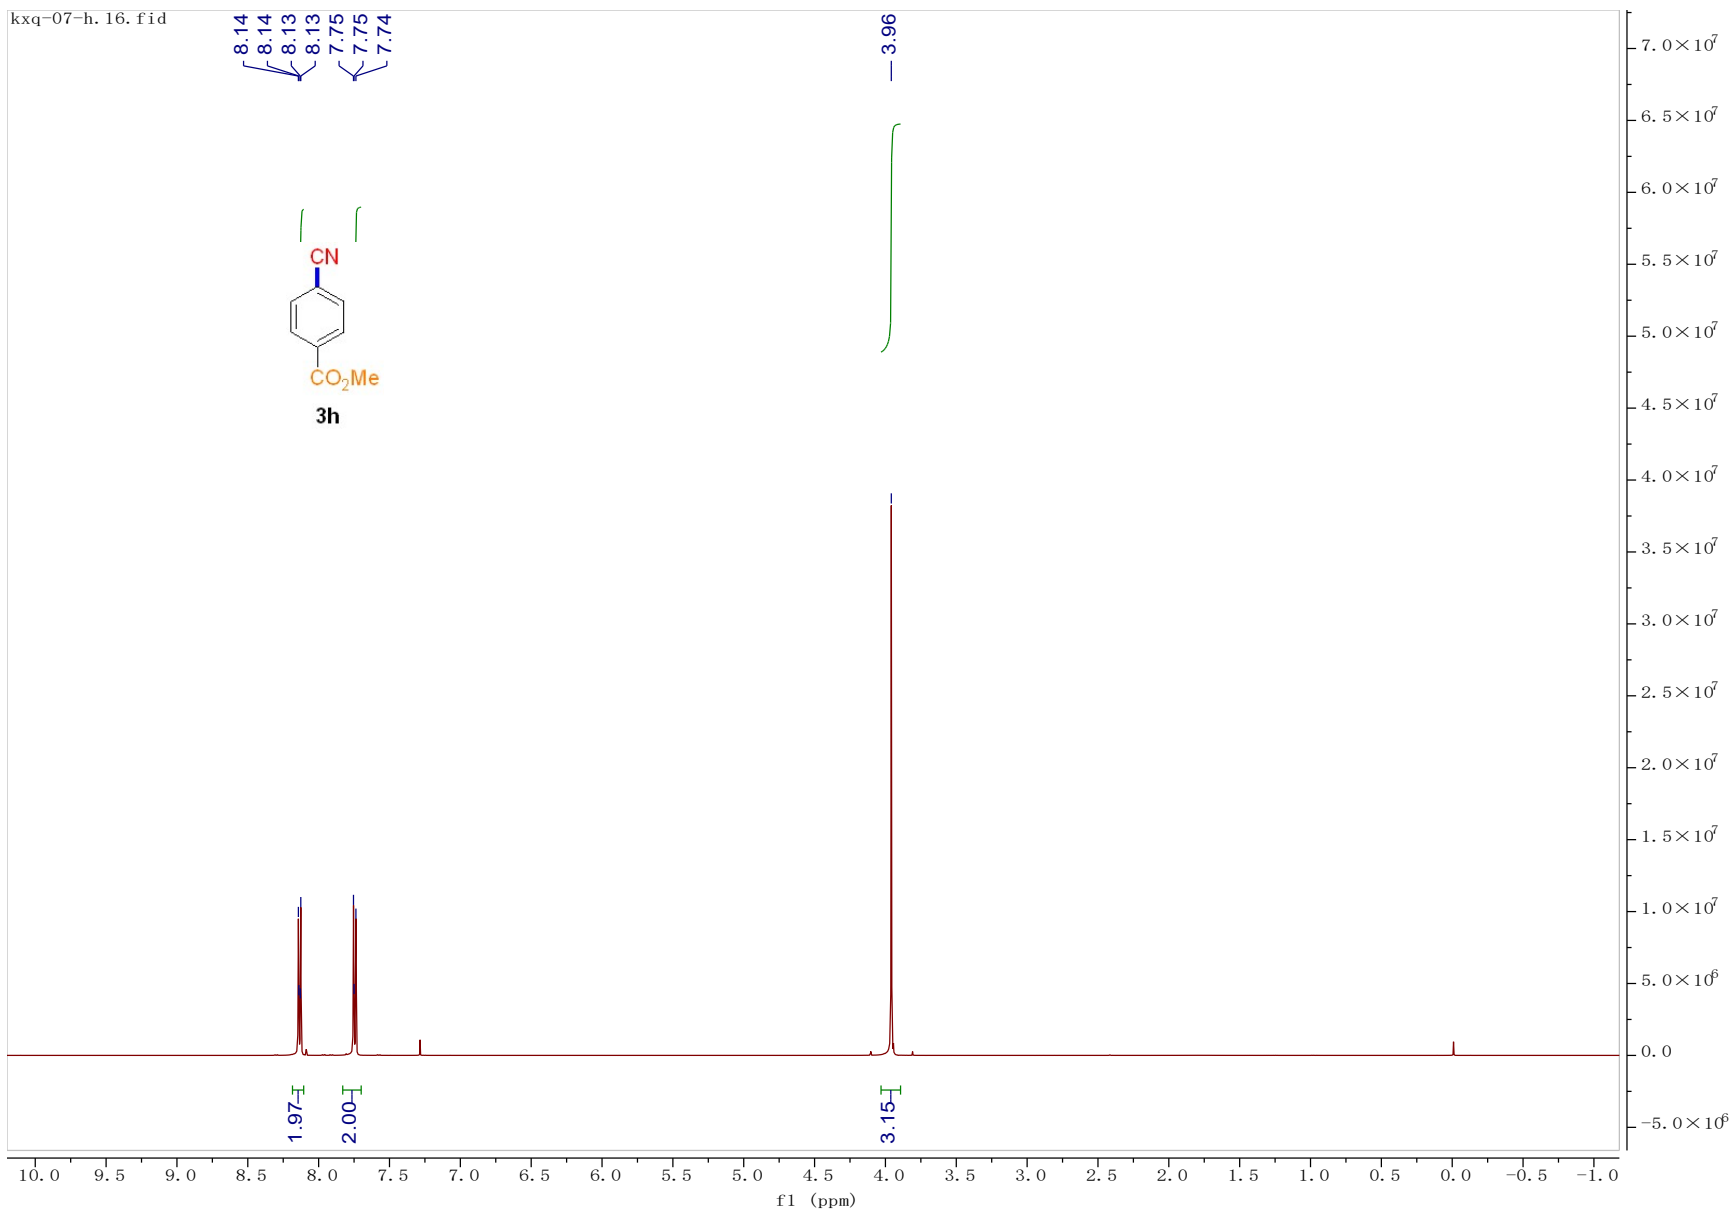



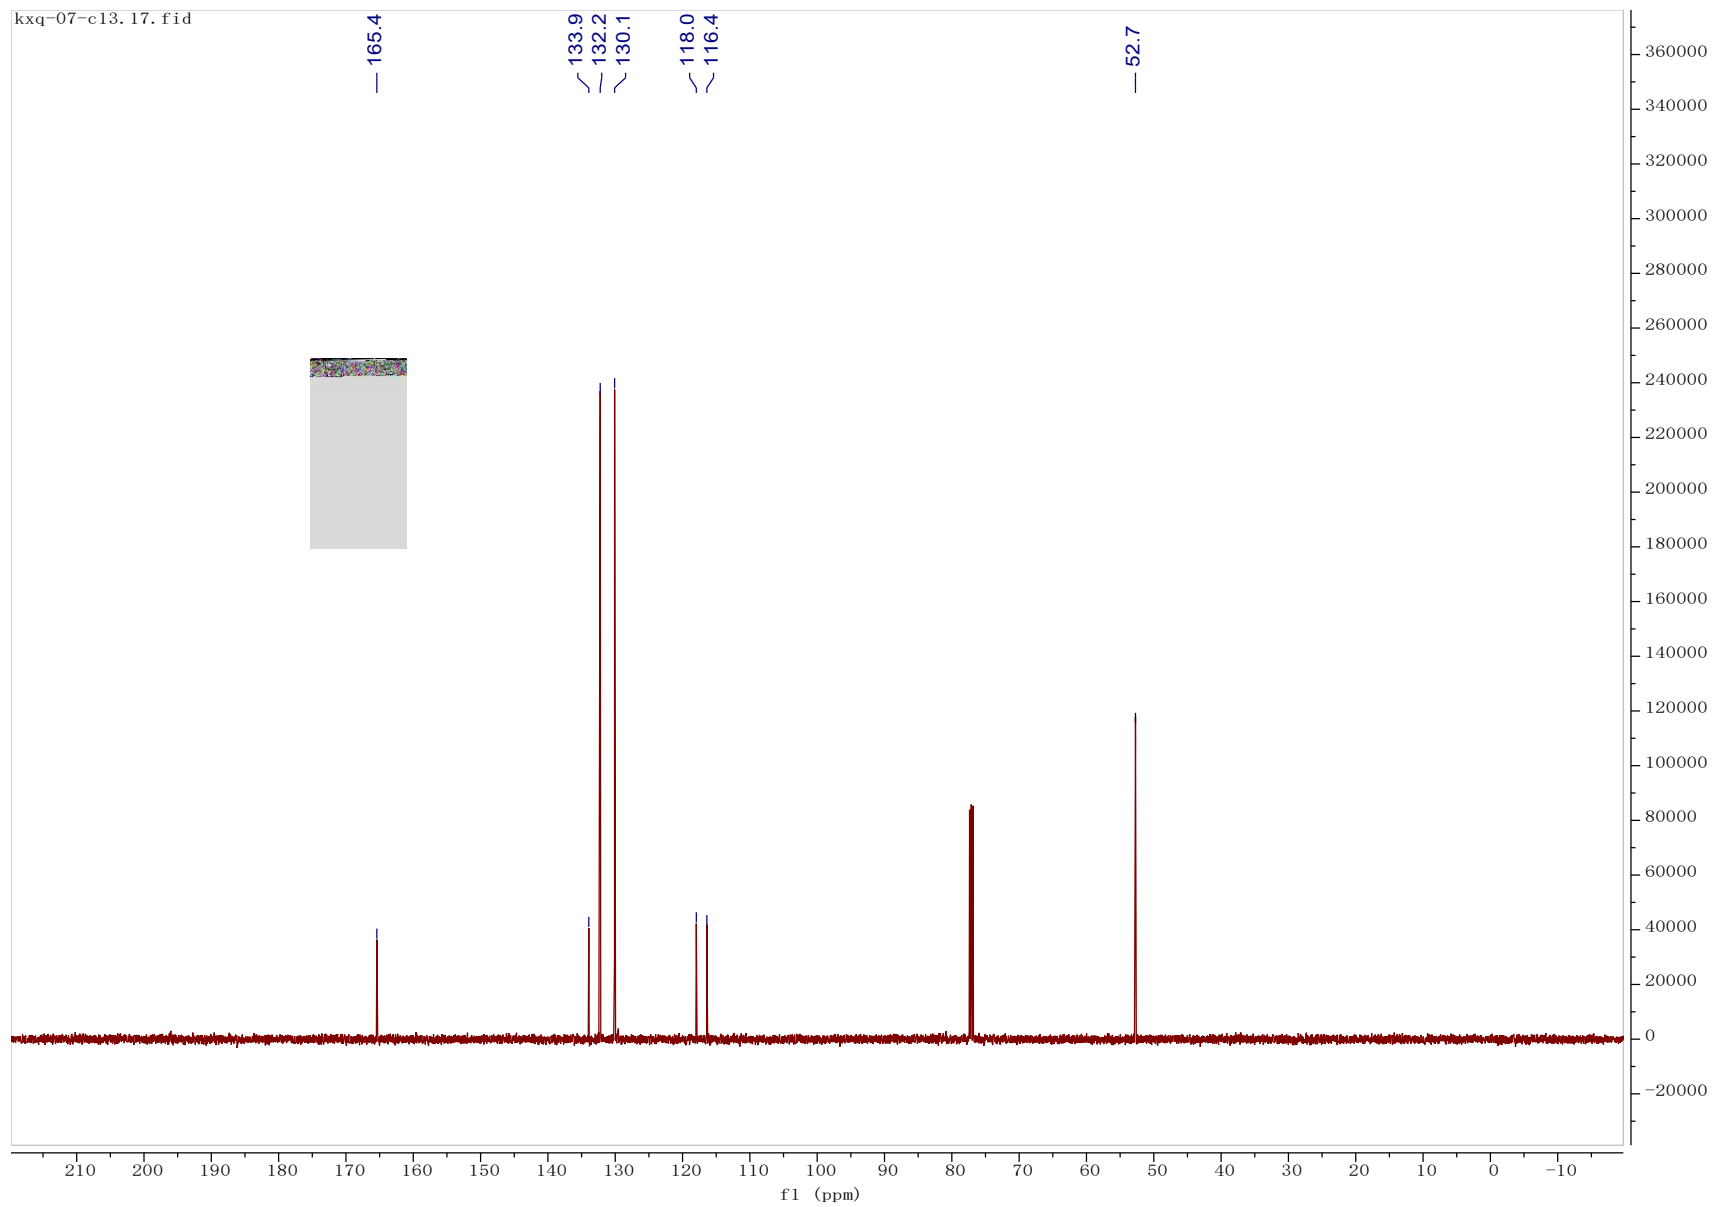

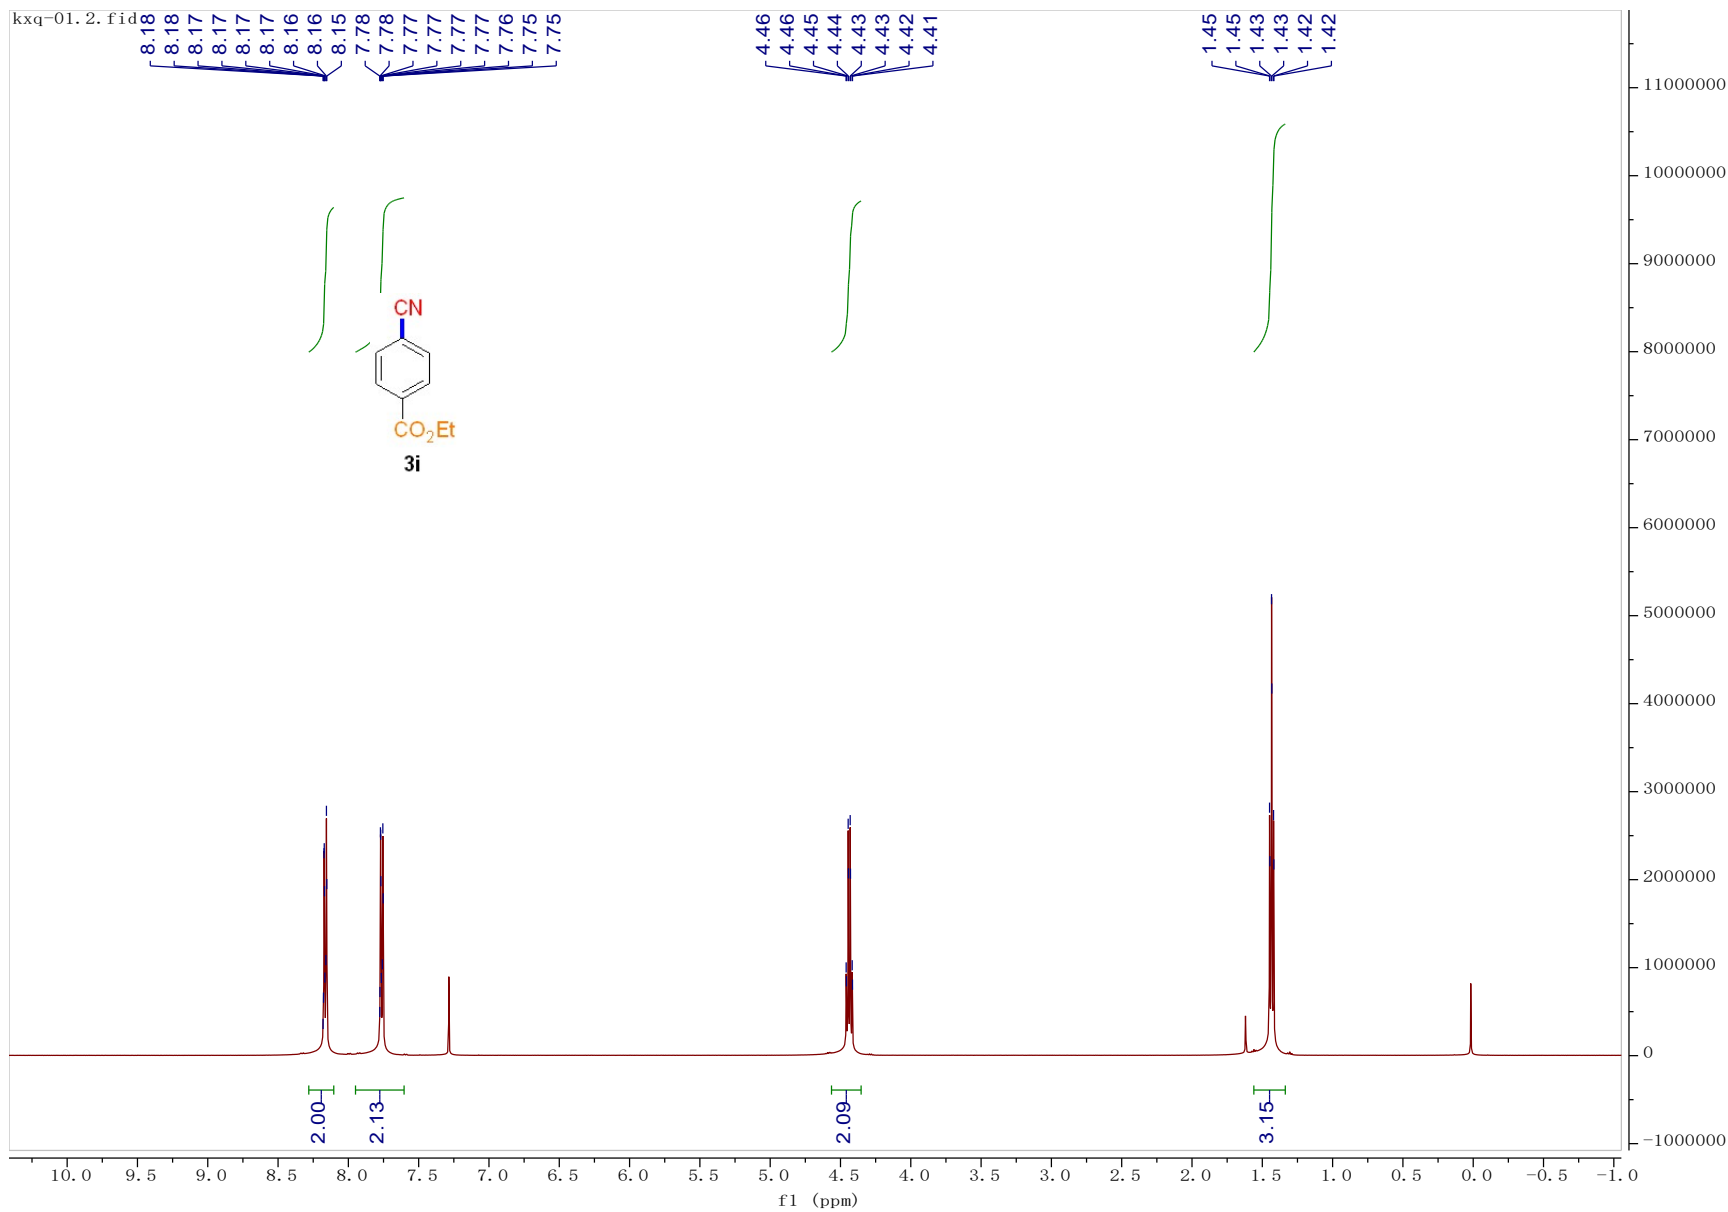

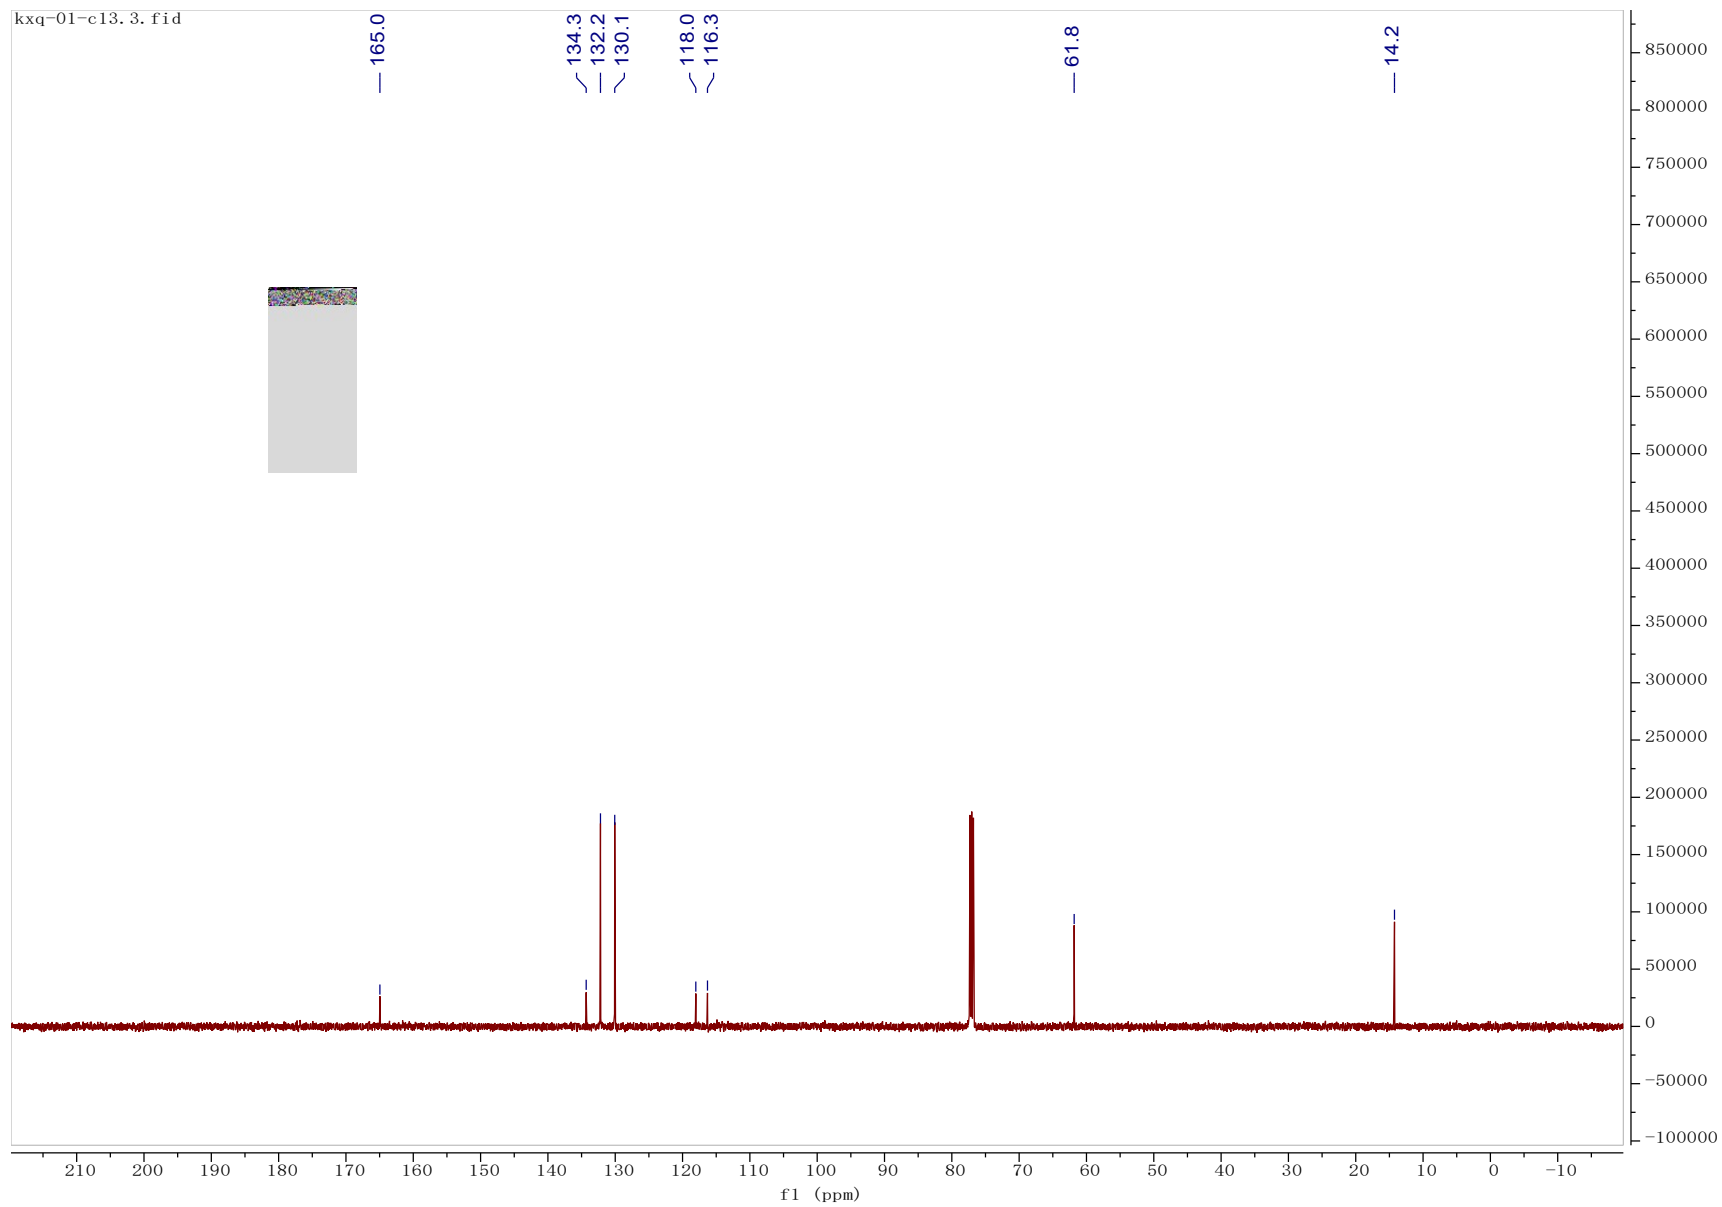

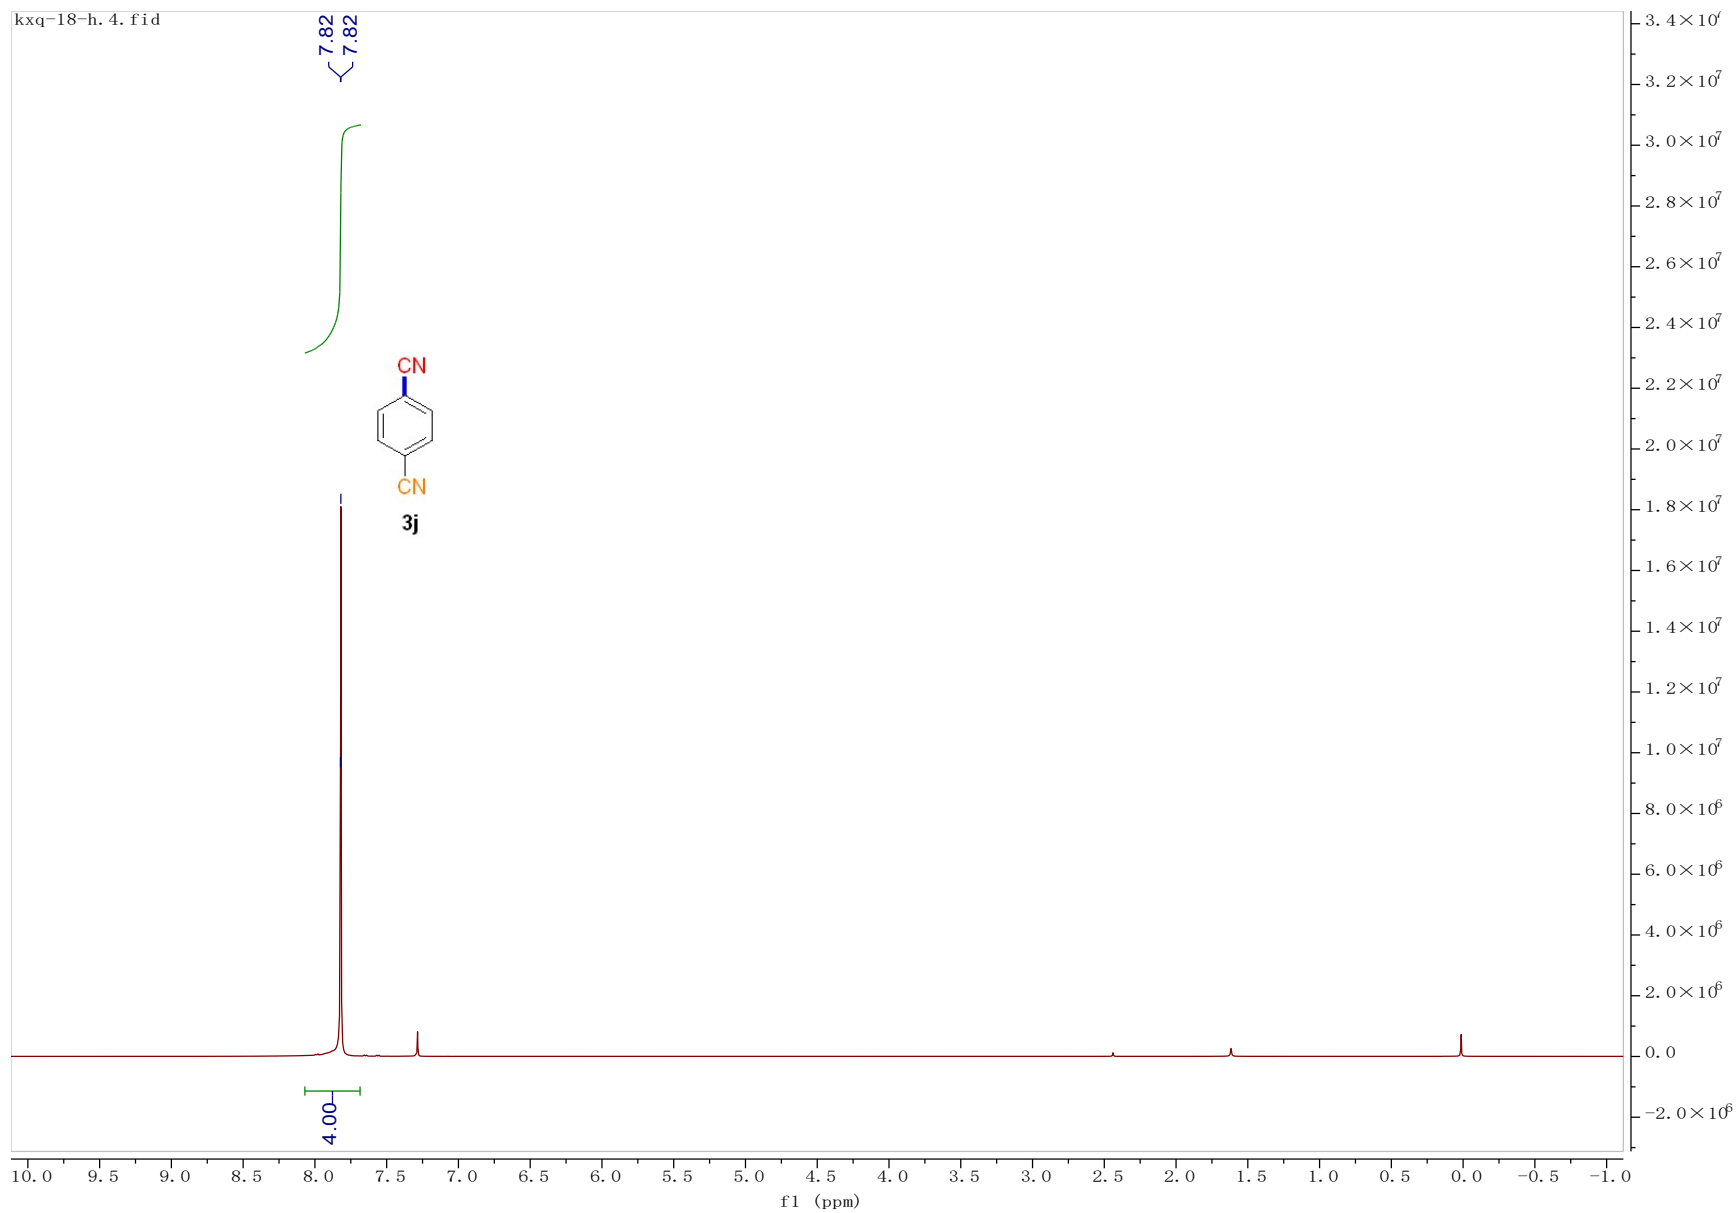

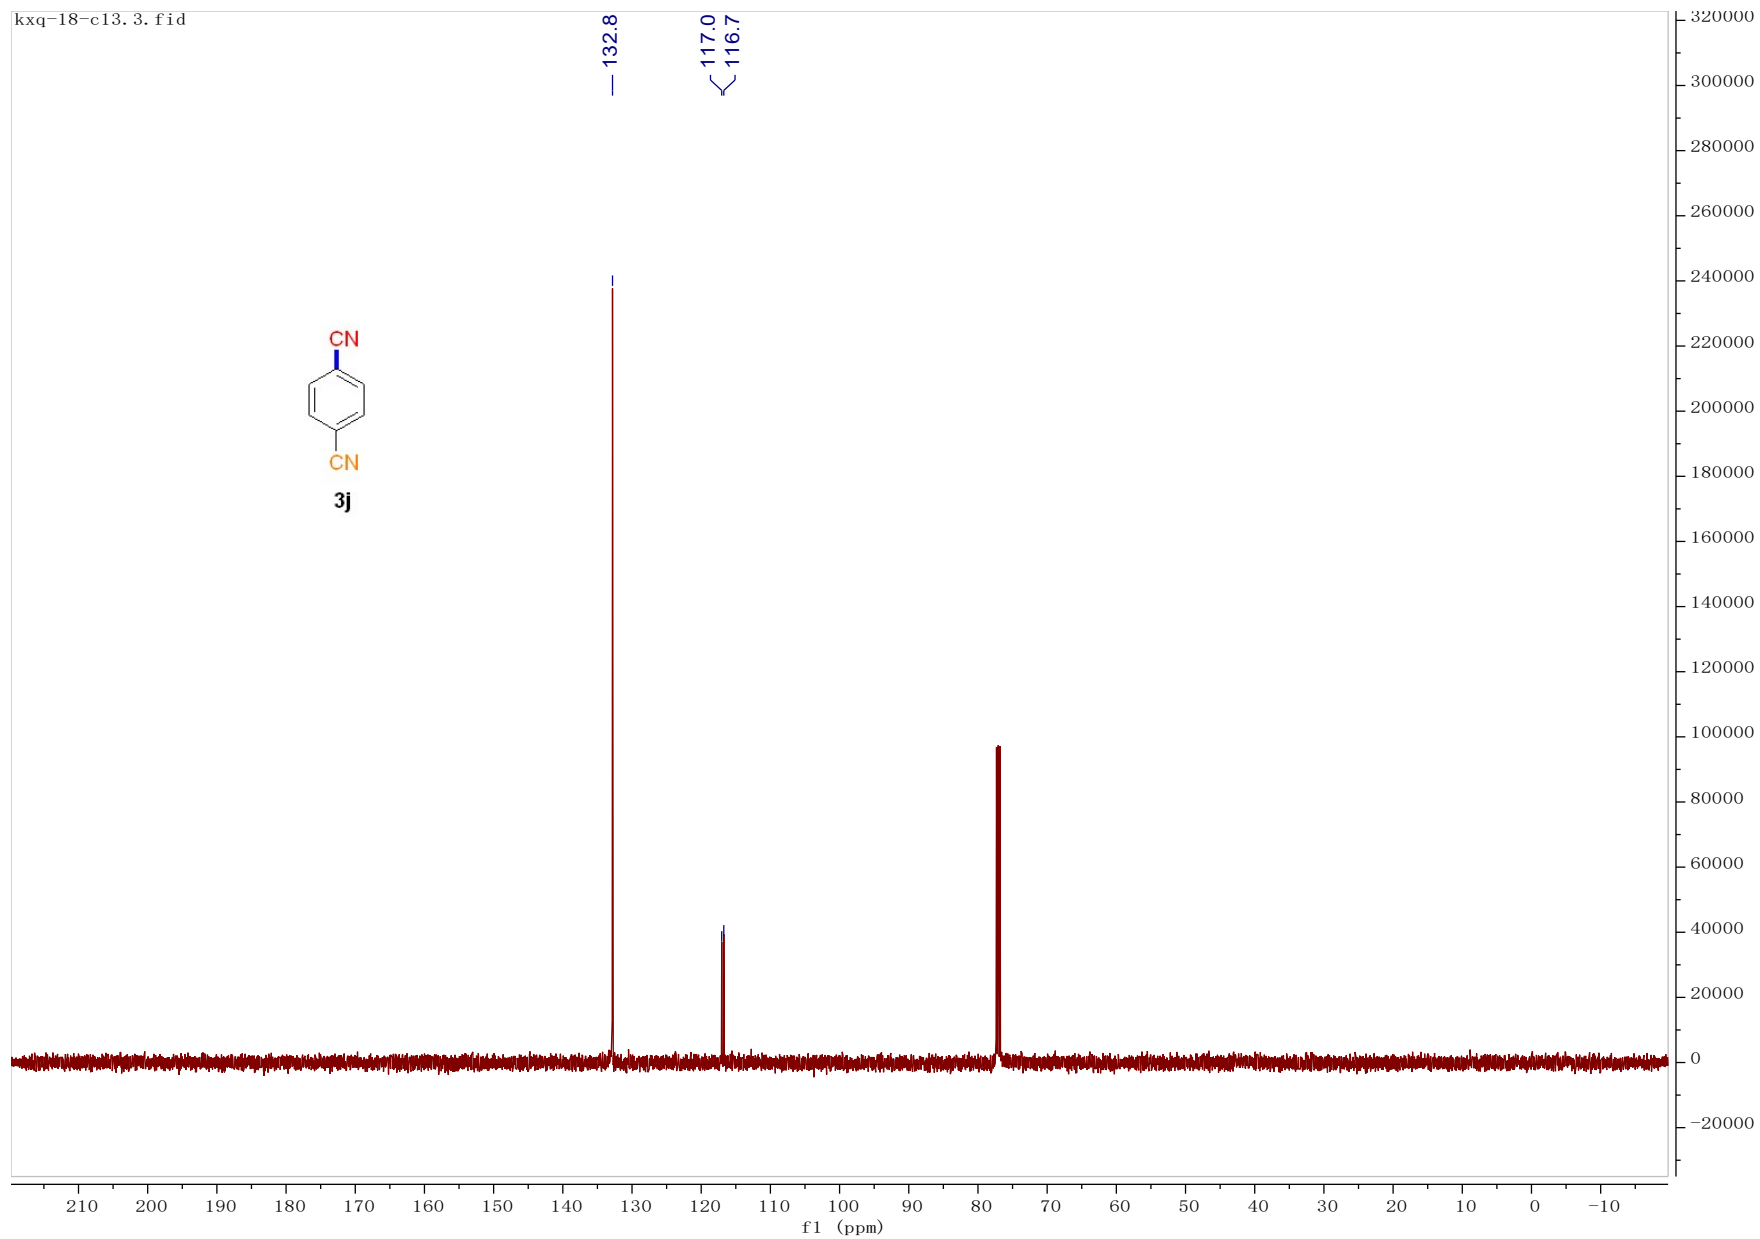

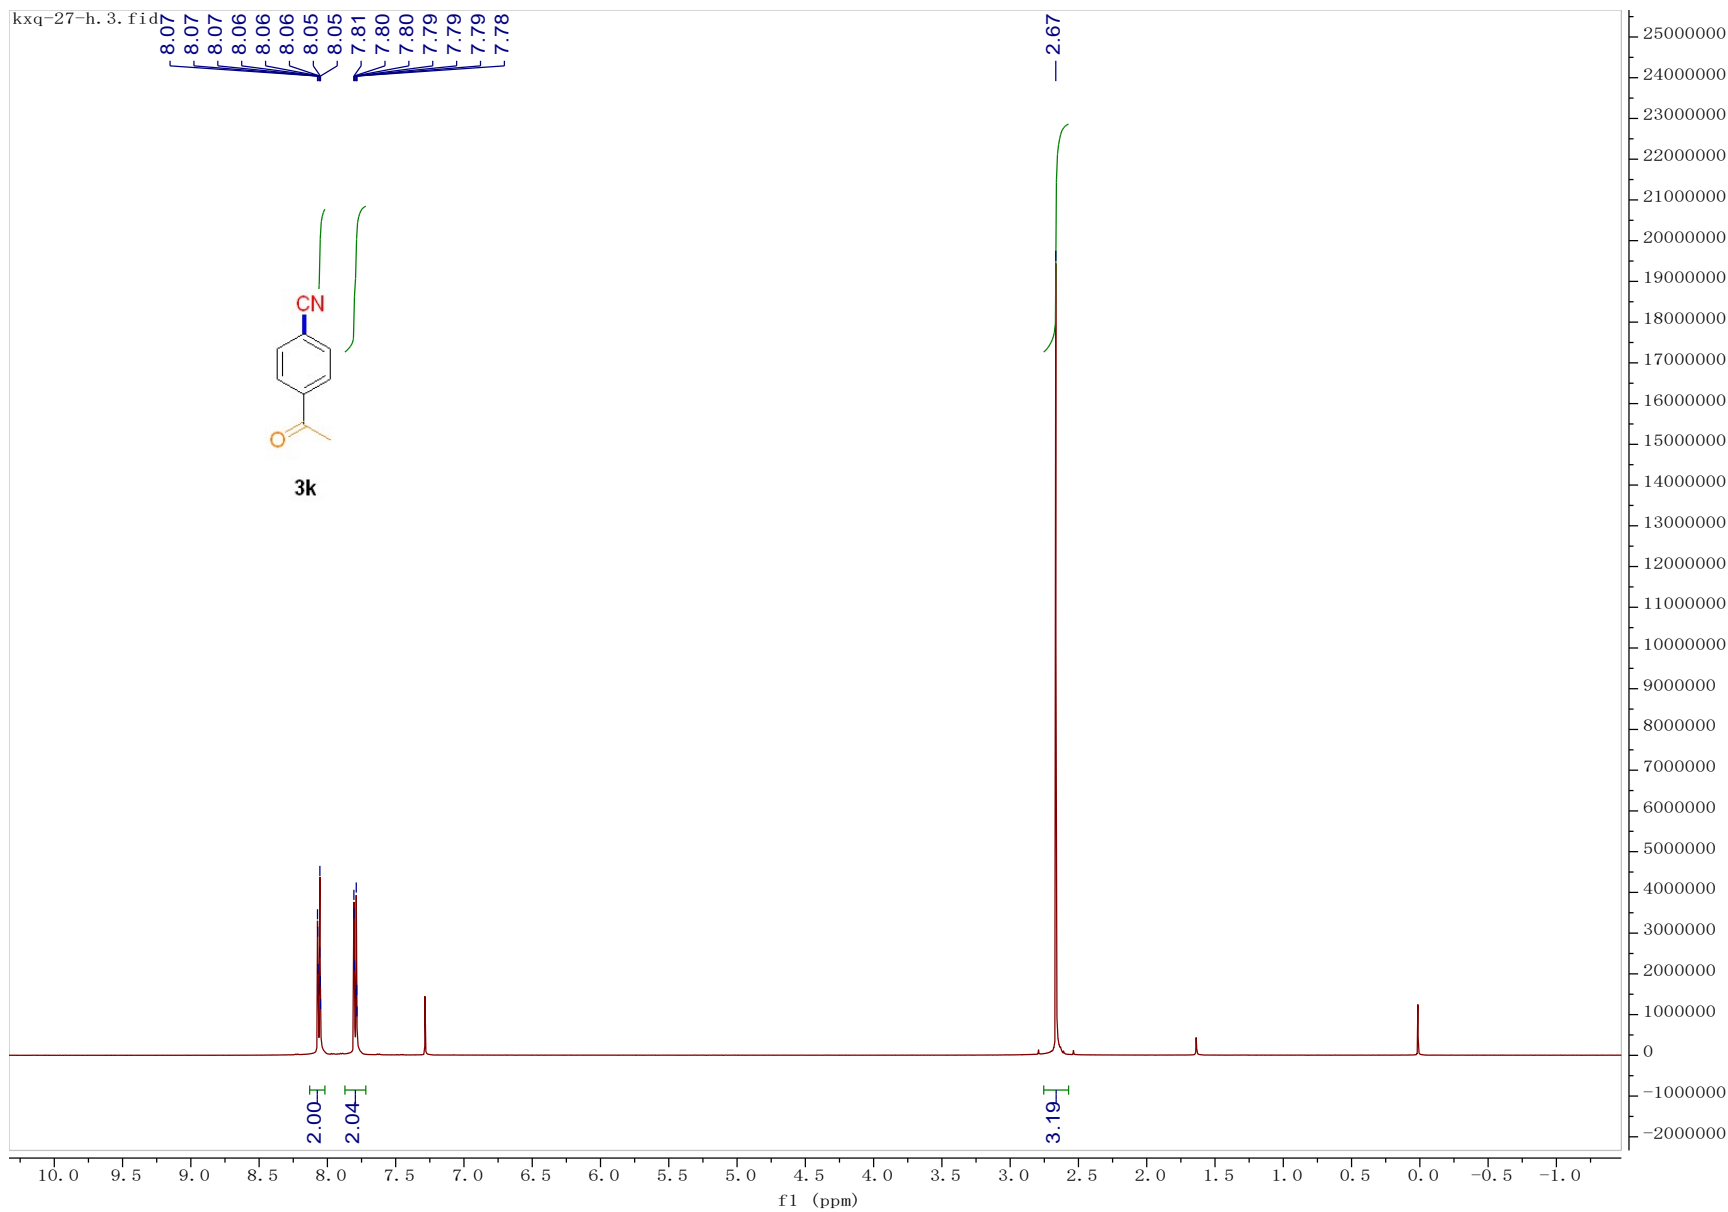

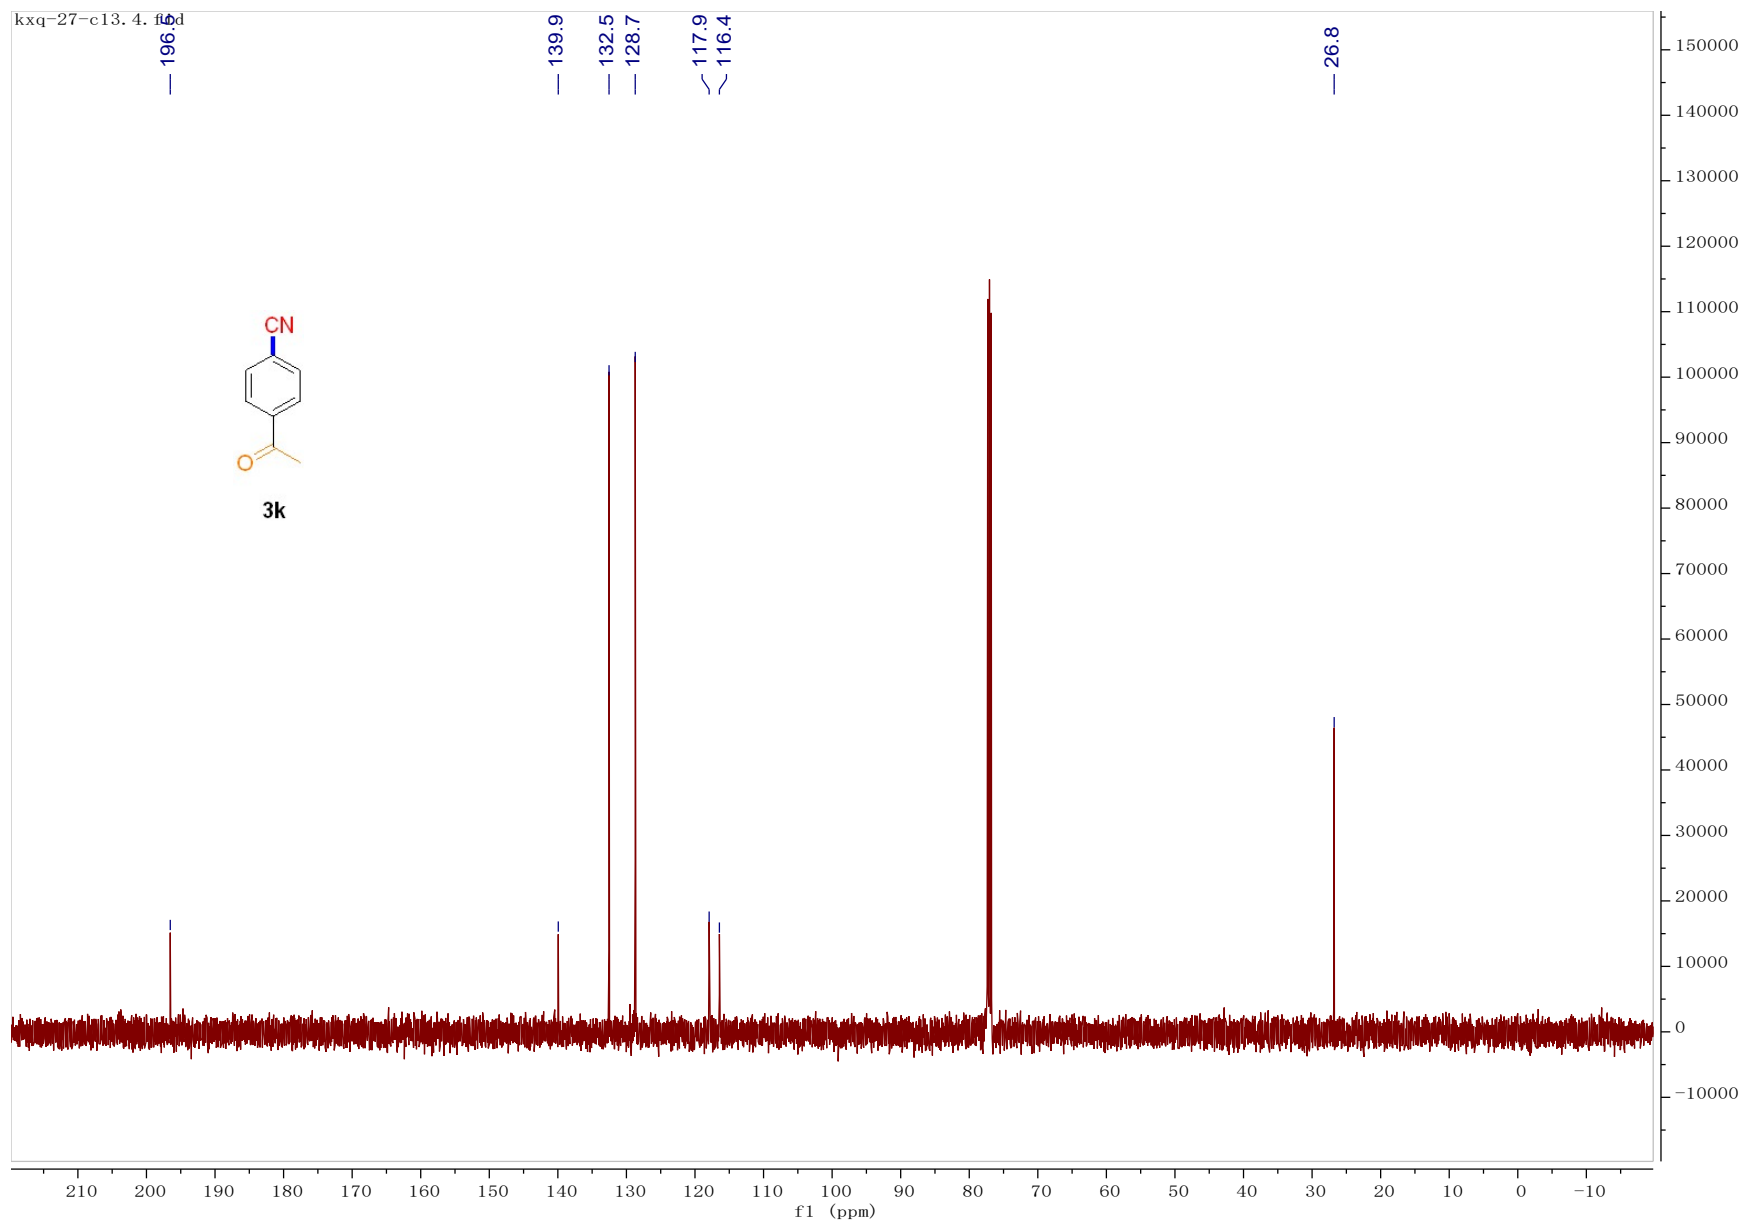

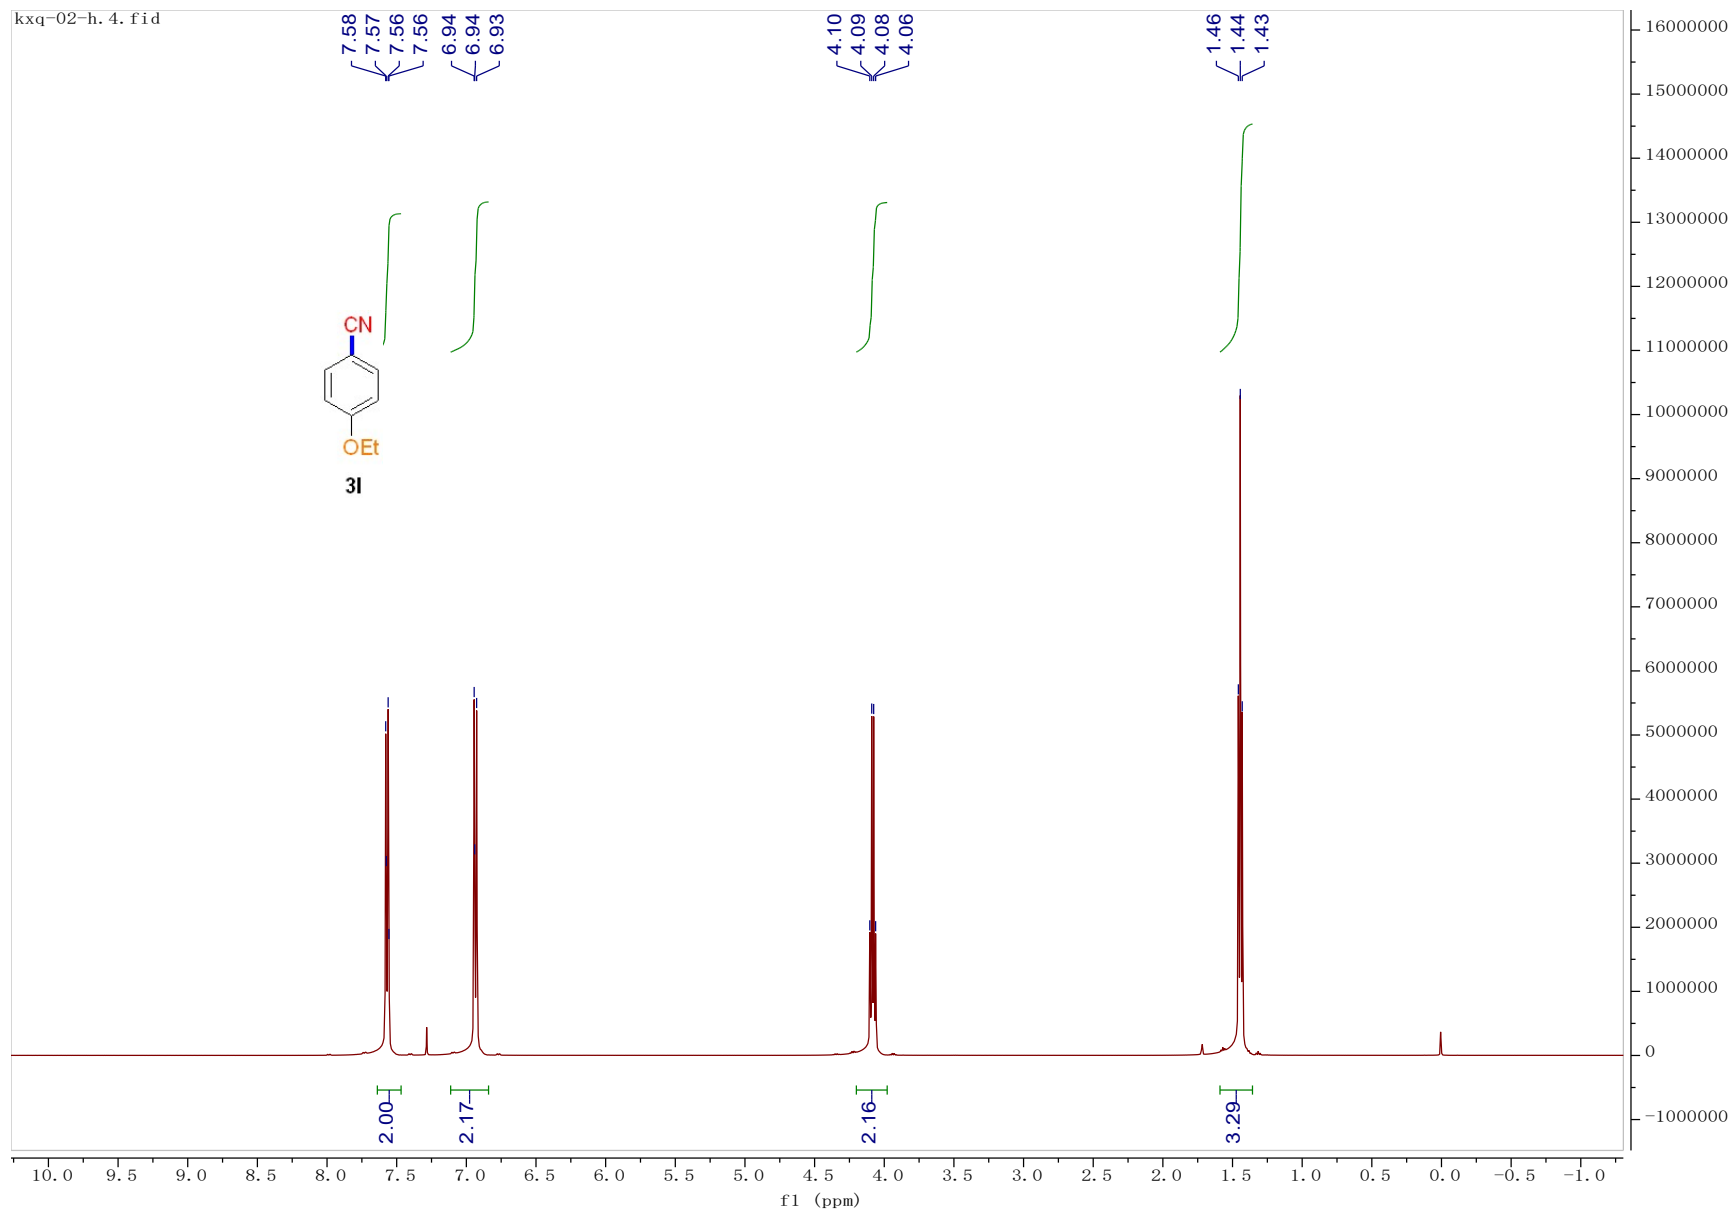



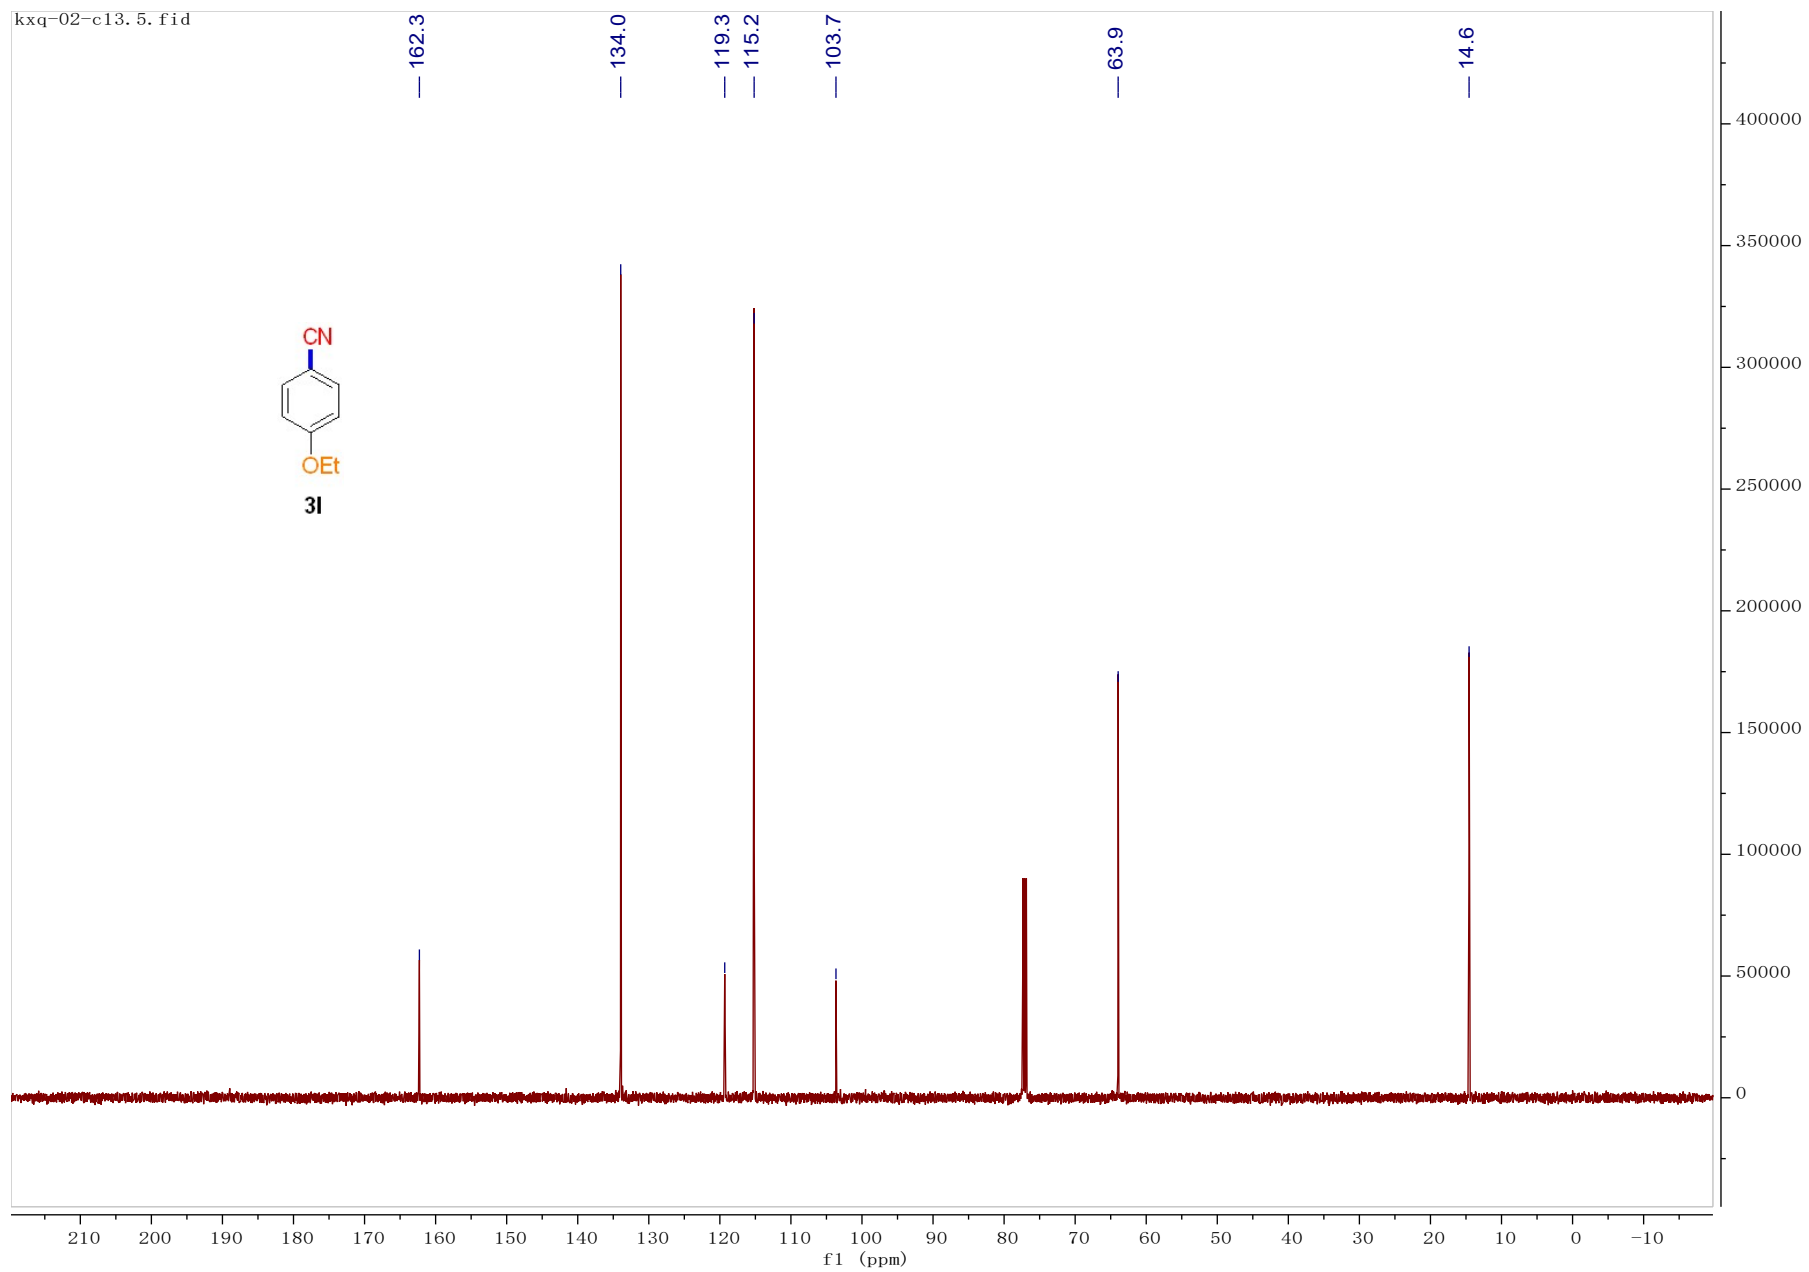

kxq-19-h. 14. fid

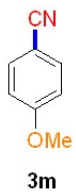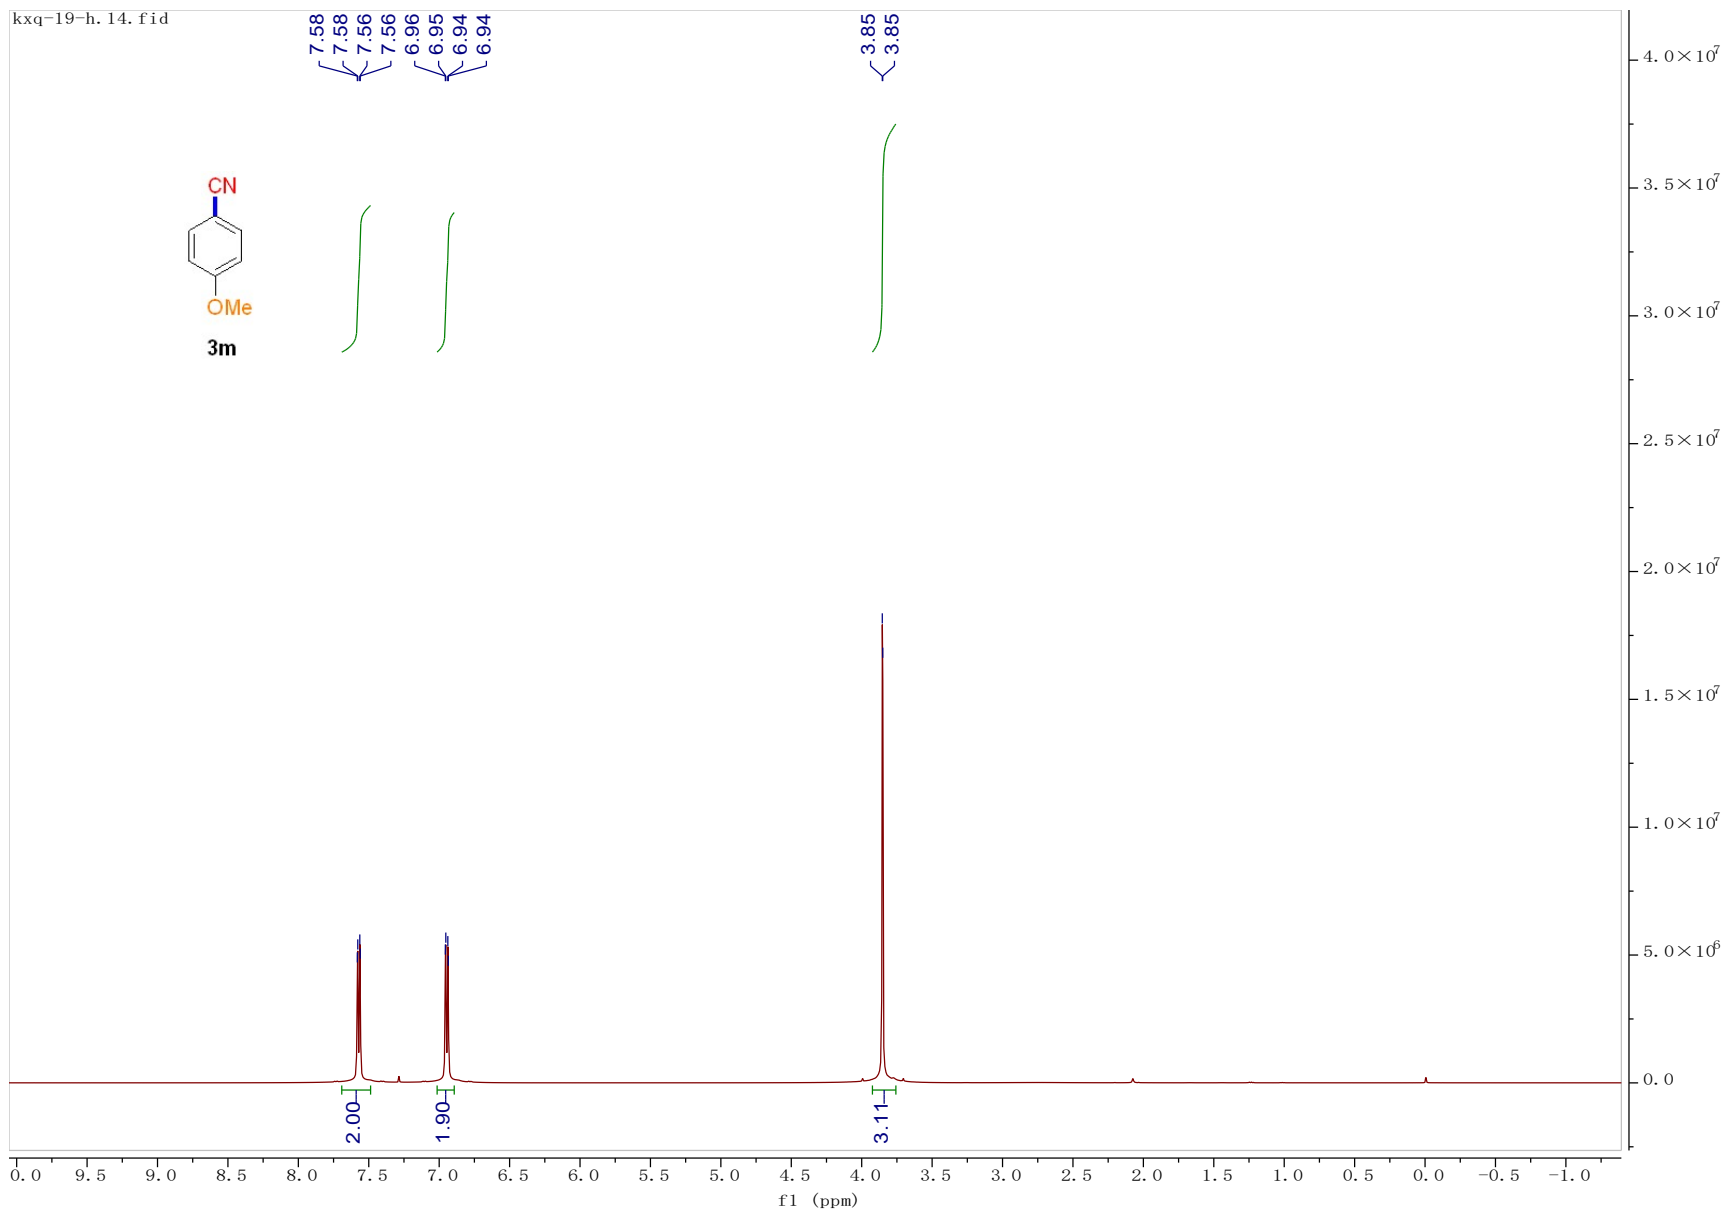

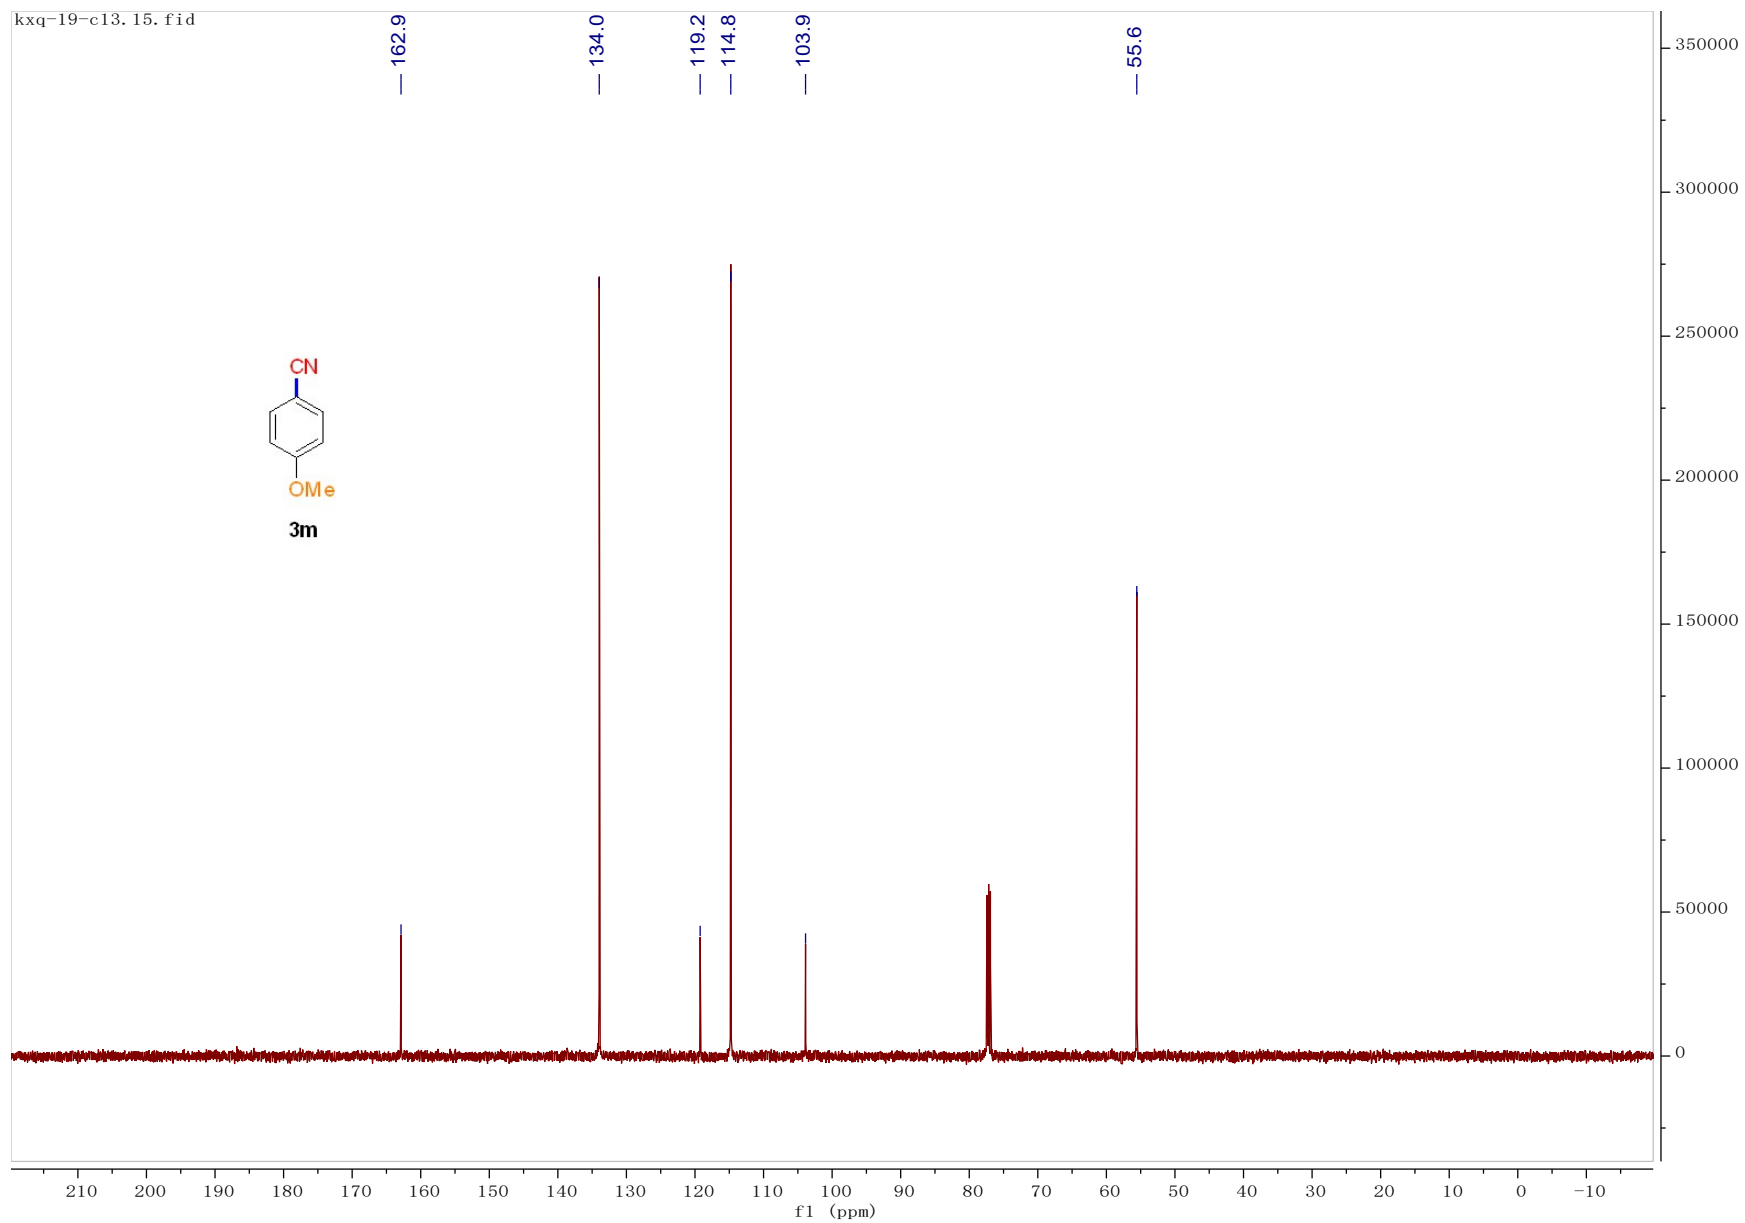

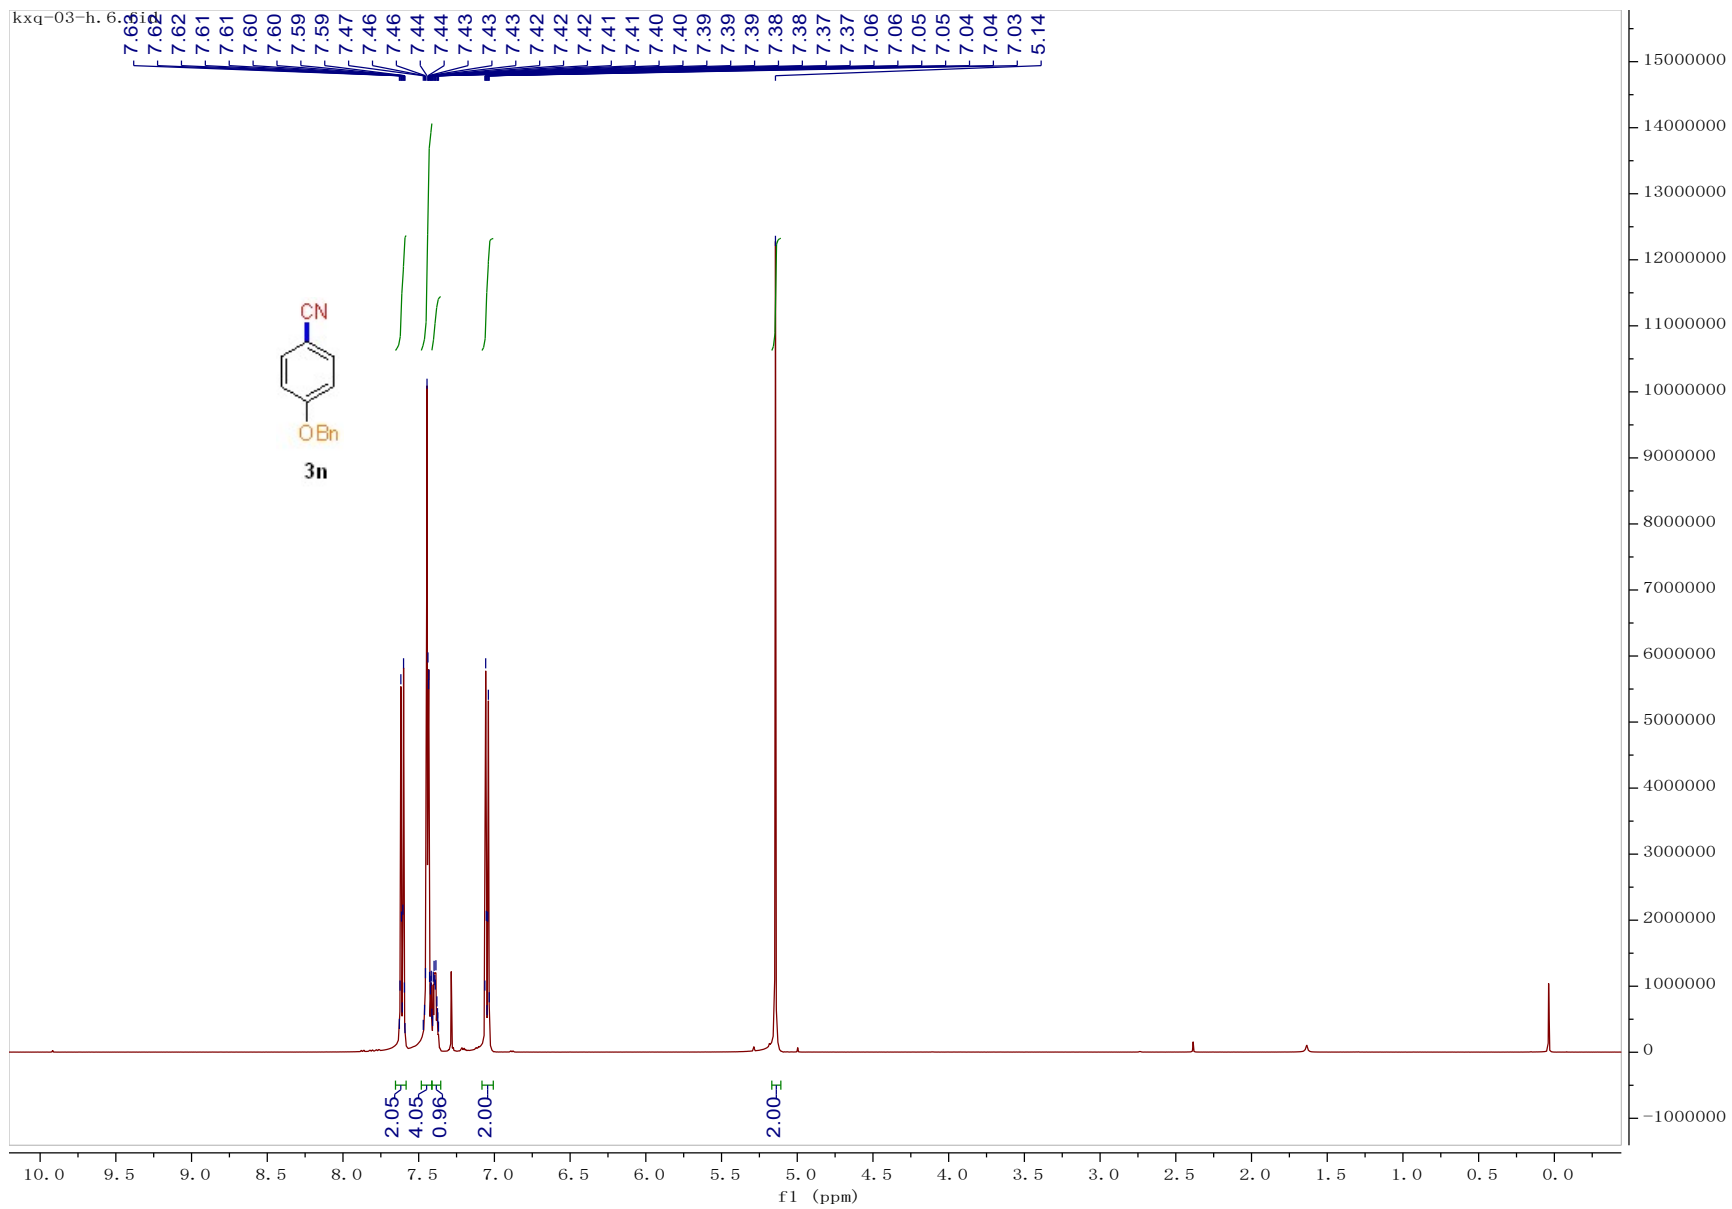

kxq-03-c13. 7. fid

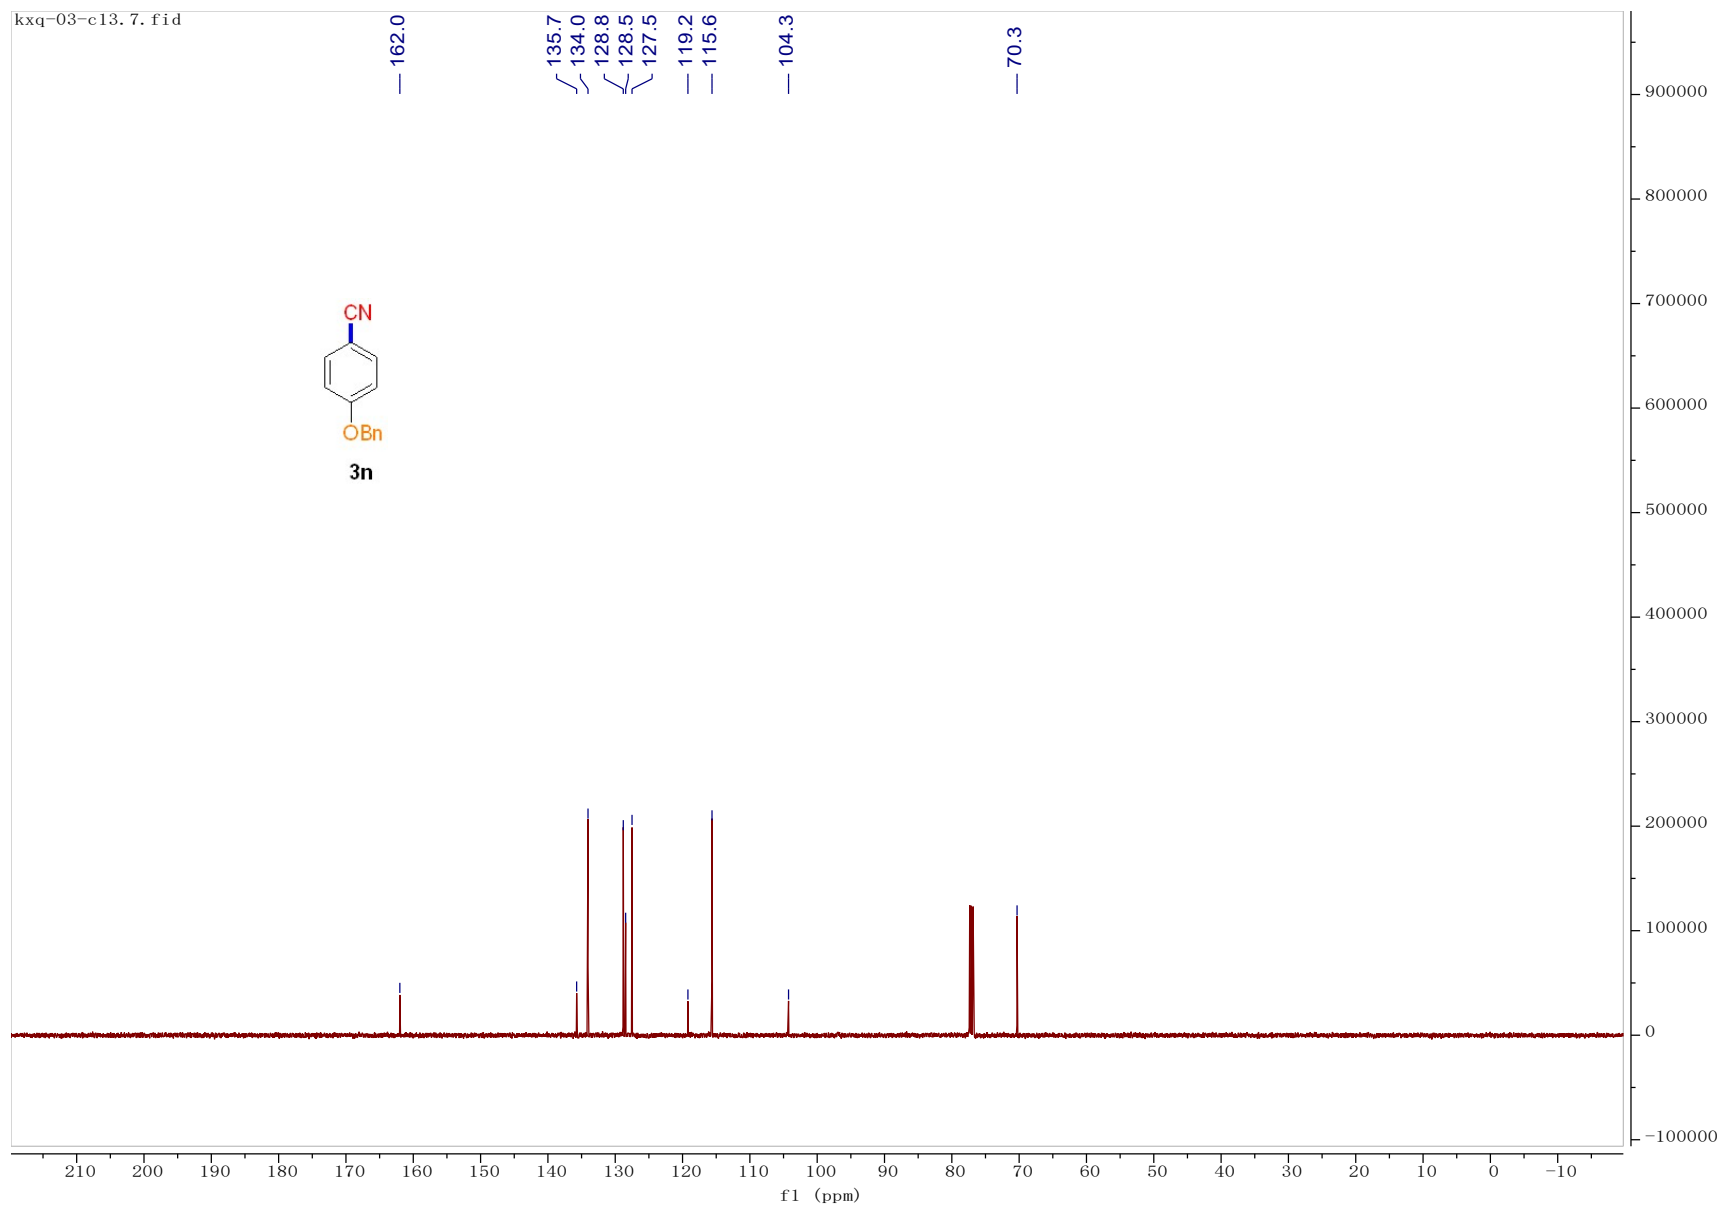

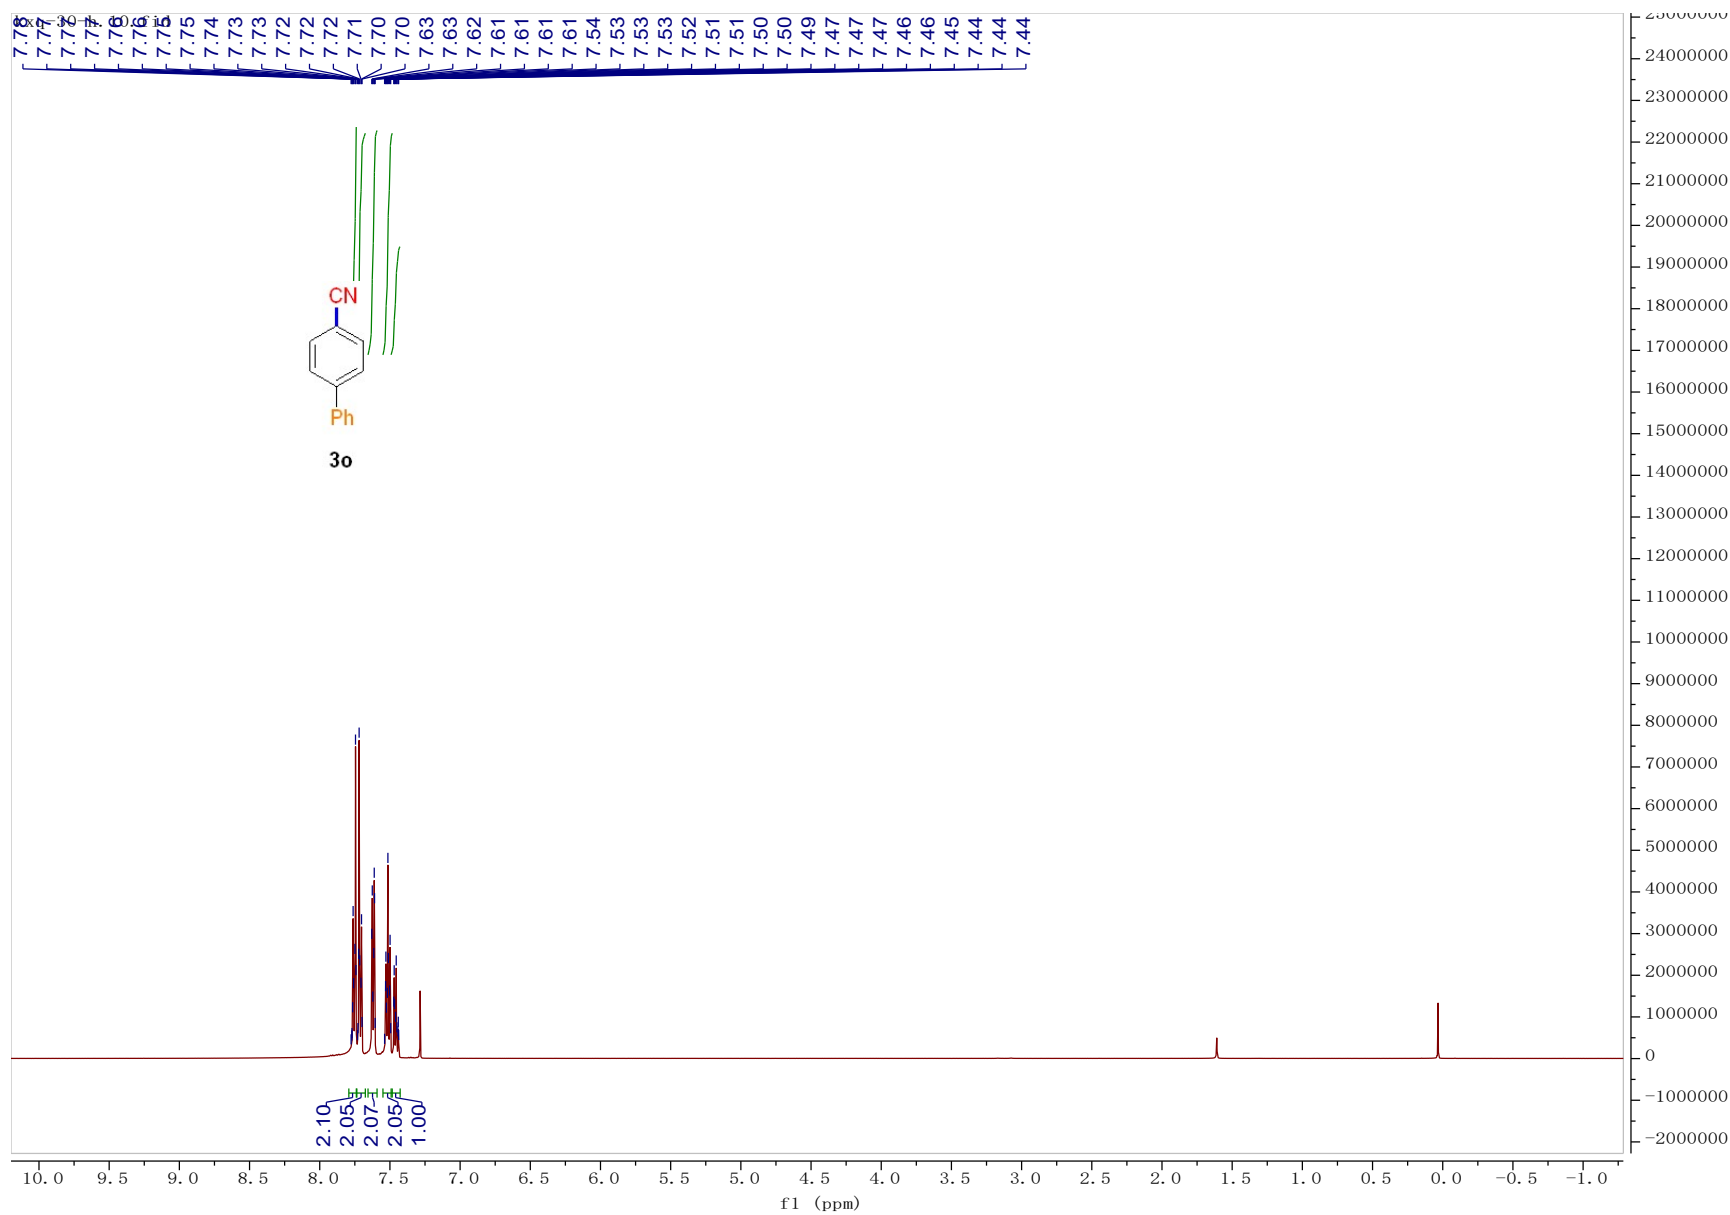

kxq-30-c13. 11. fid

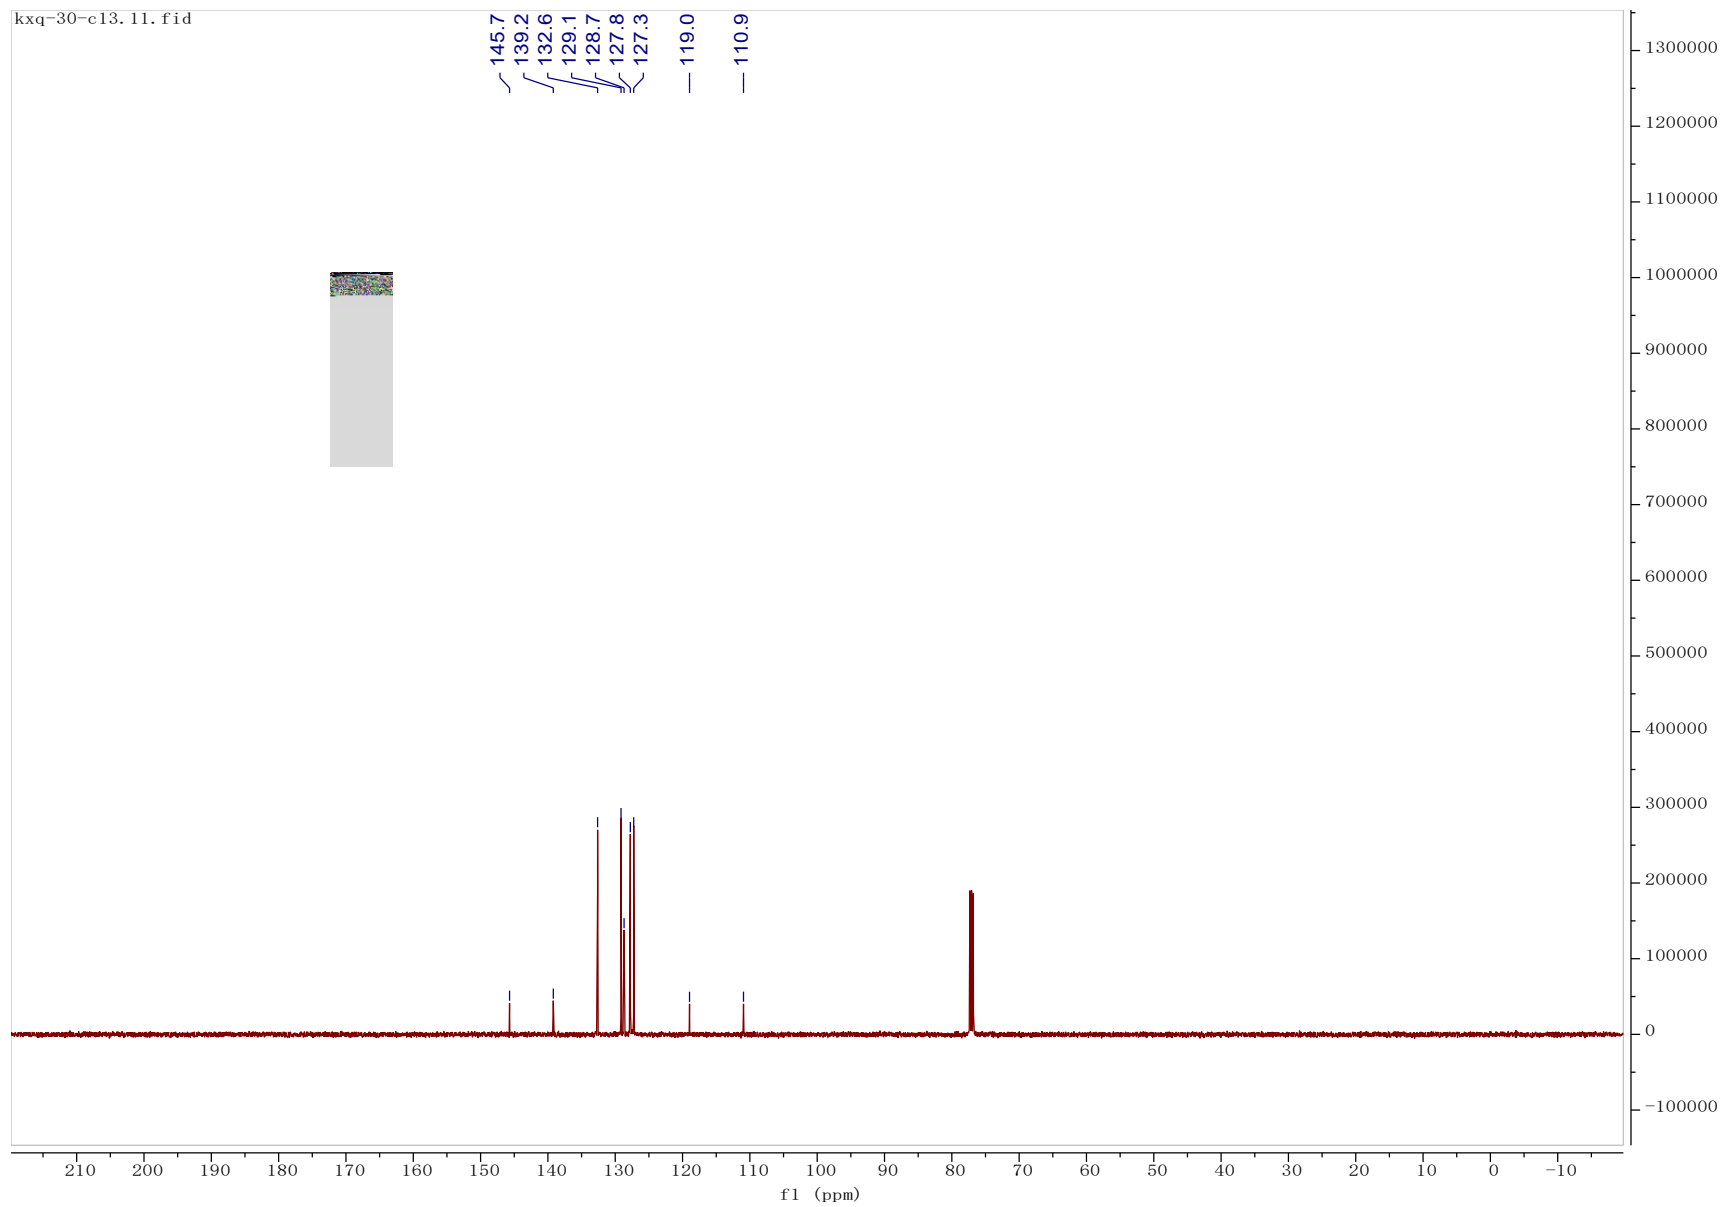

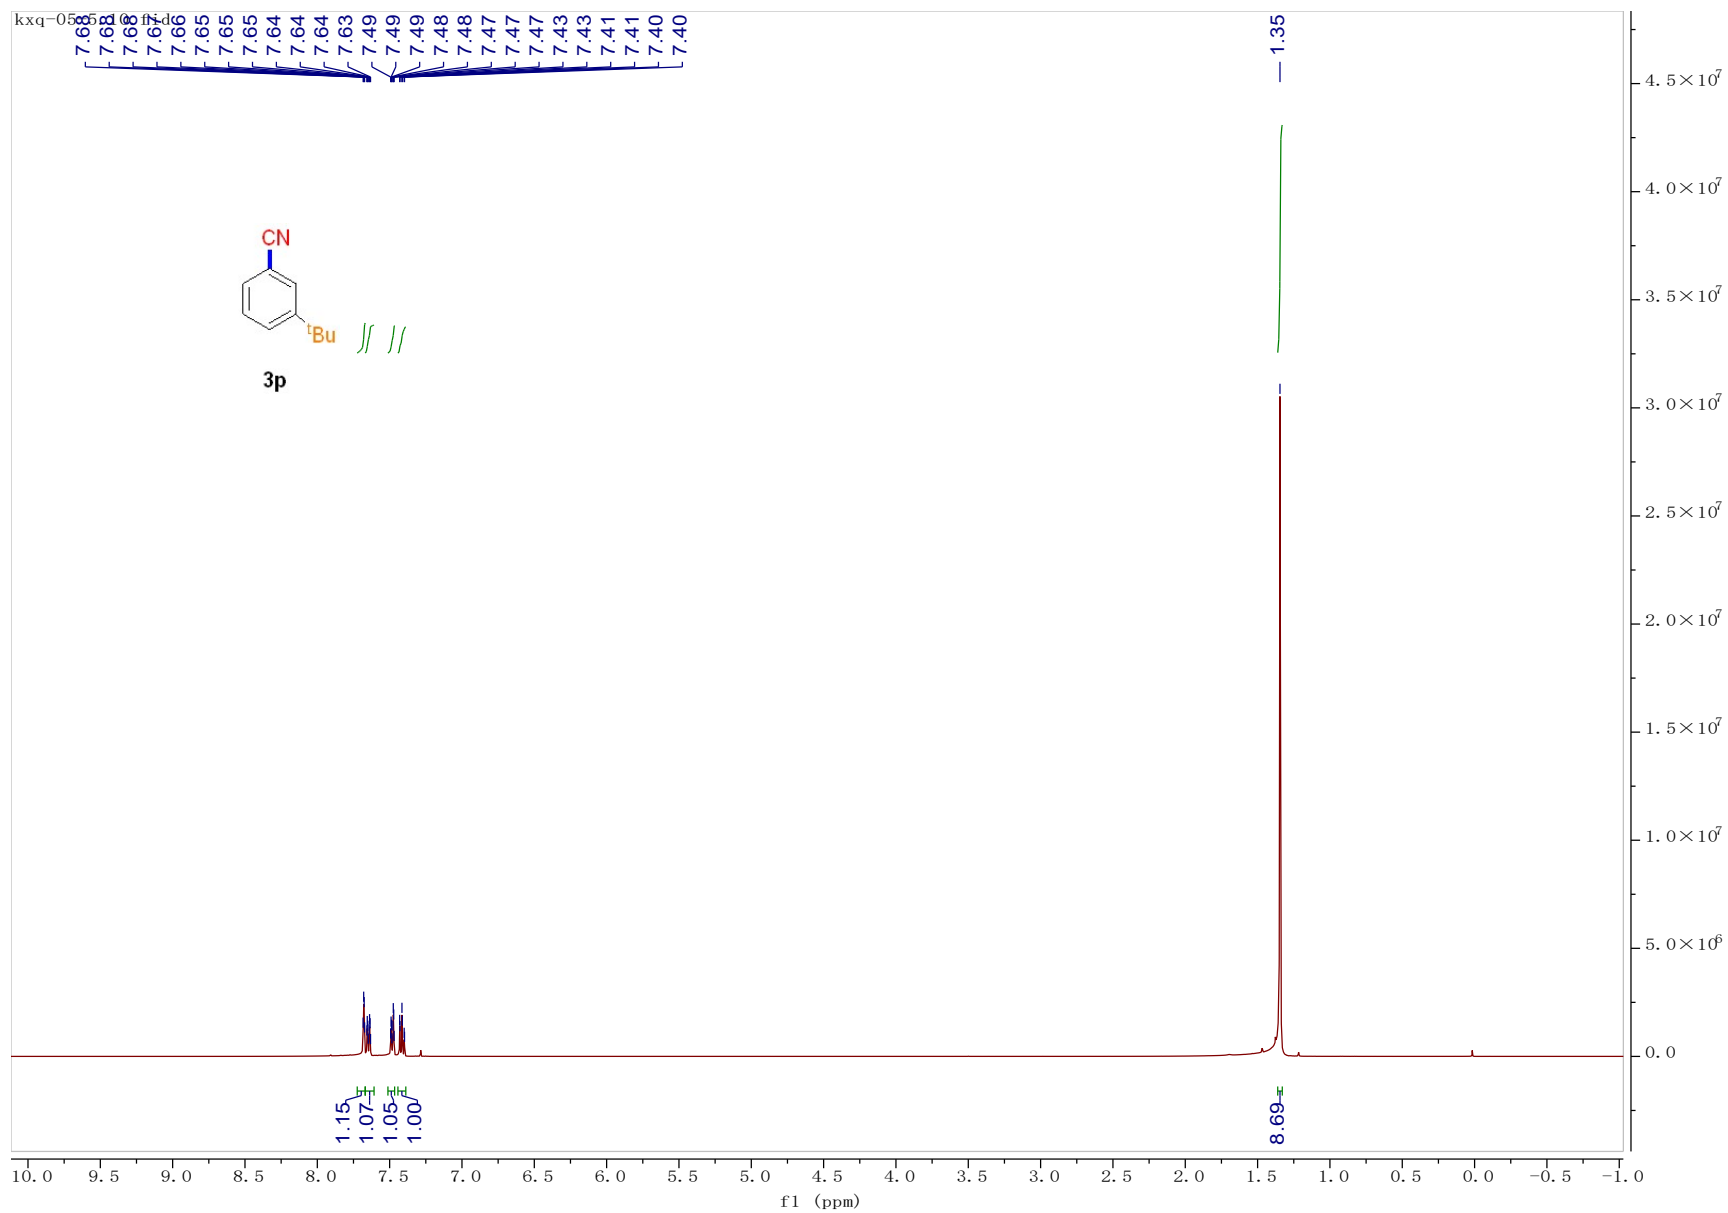



kxq-05-c13-1.12.fid

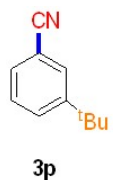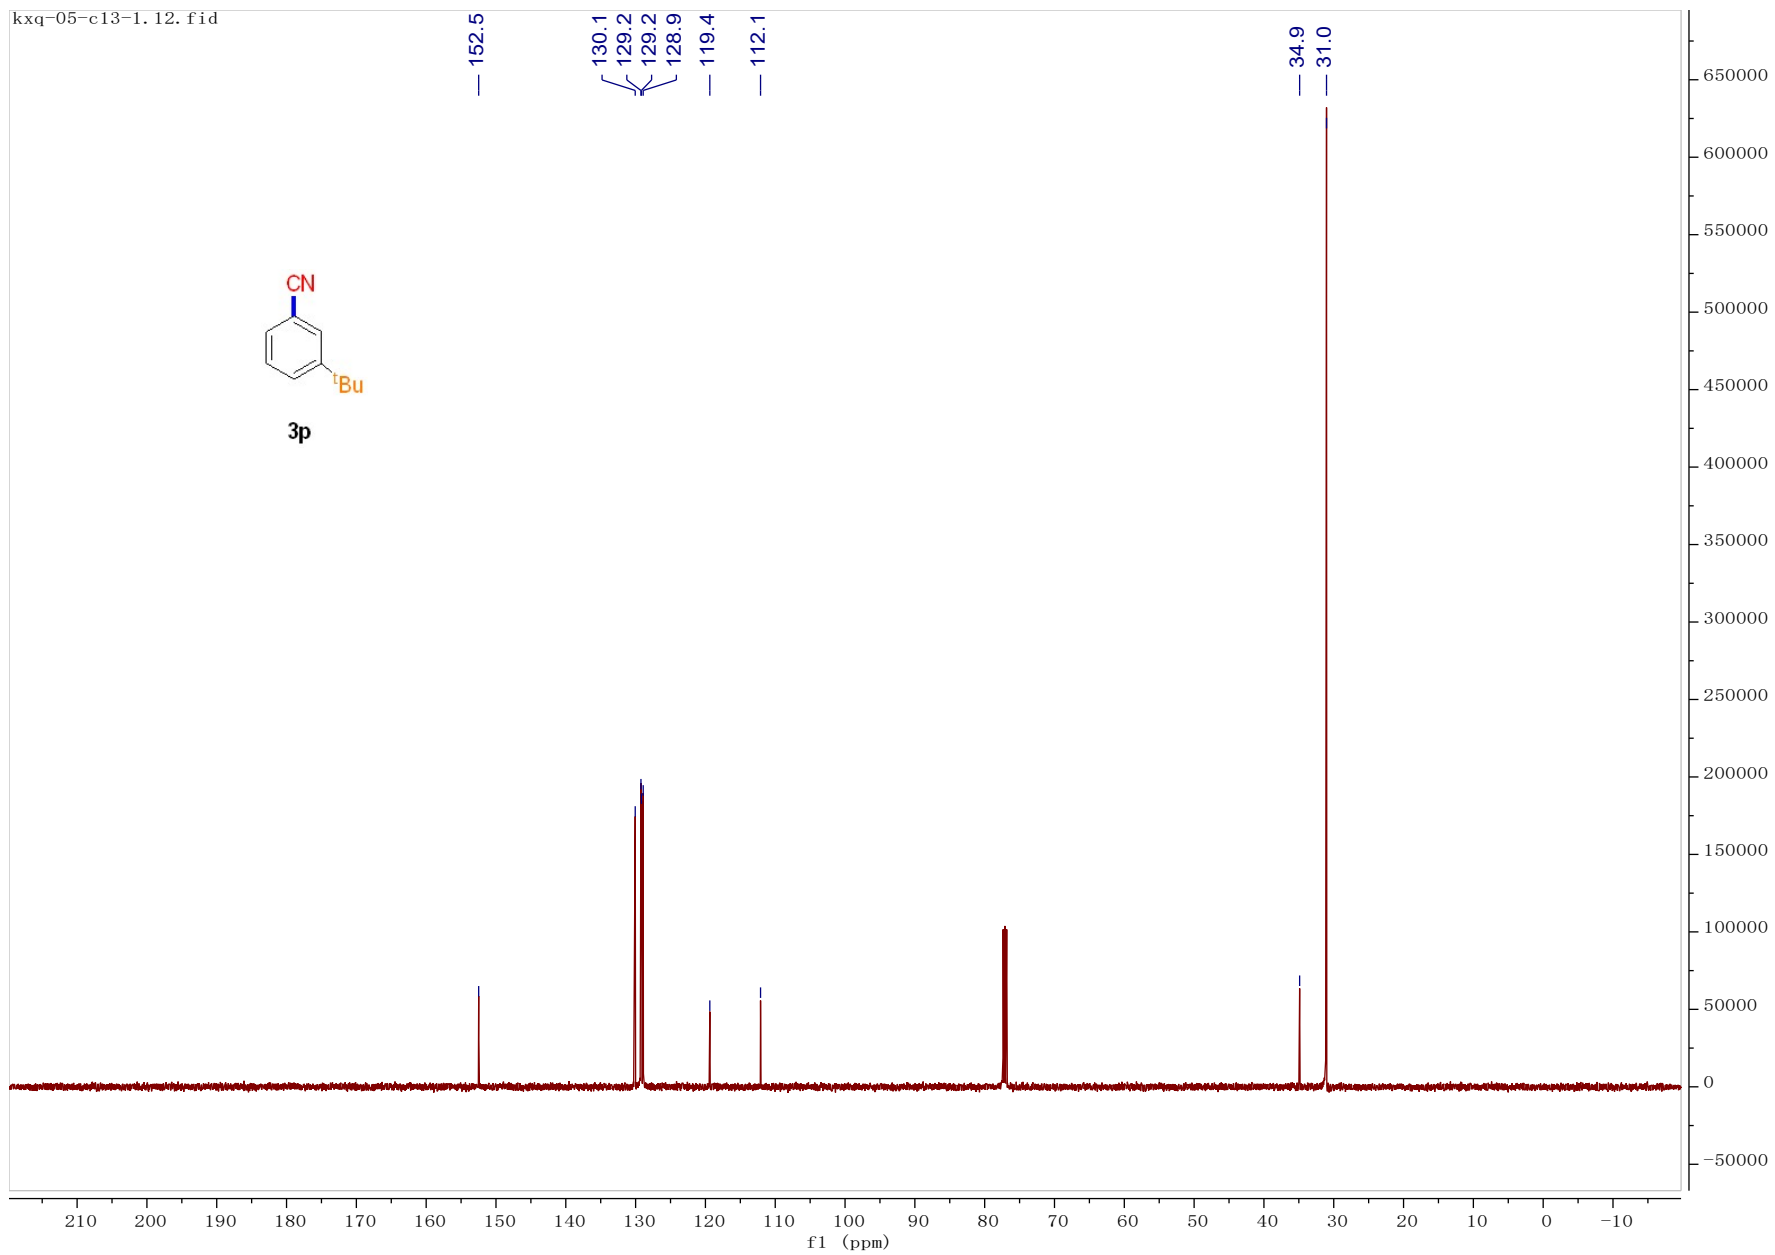

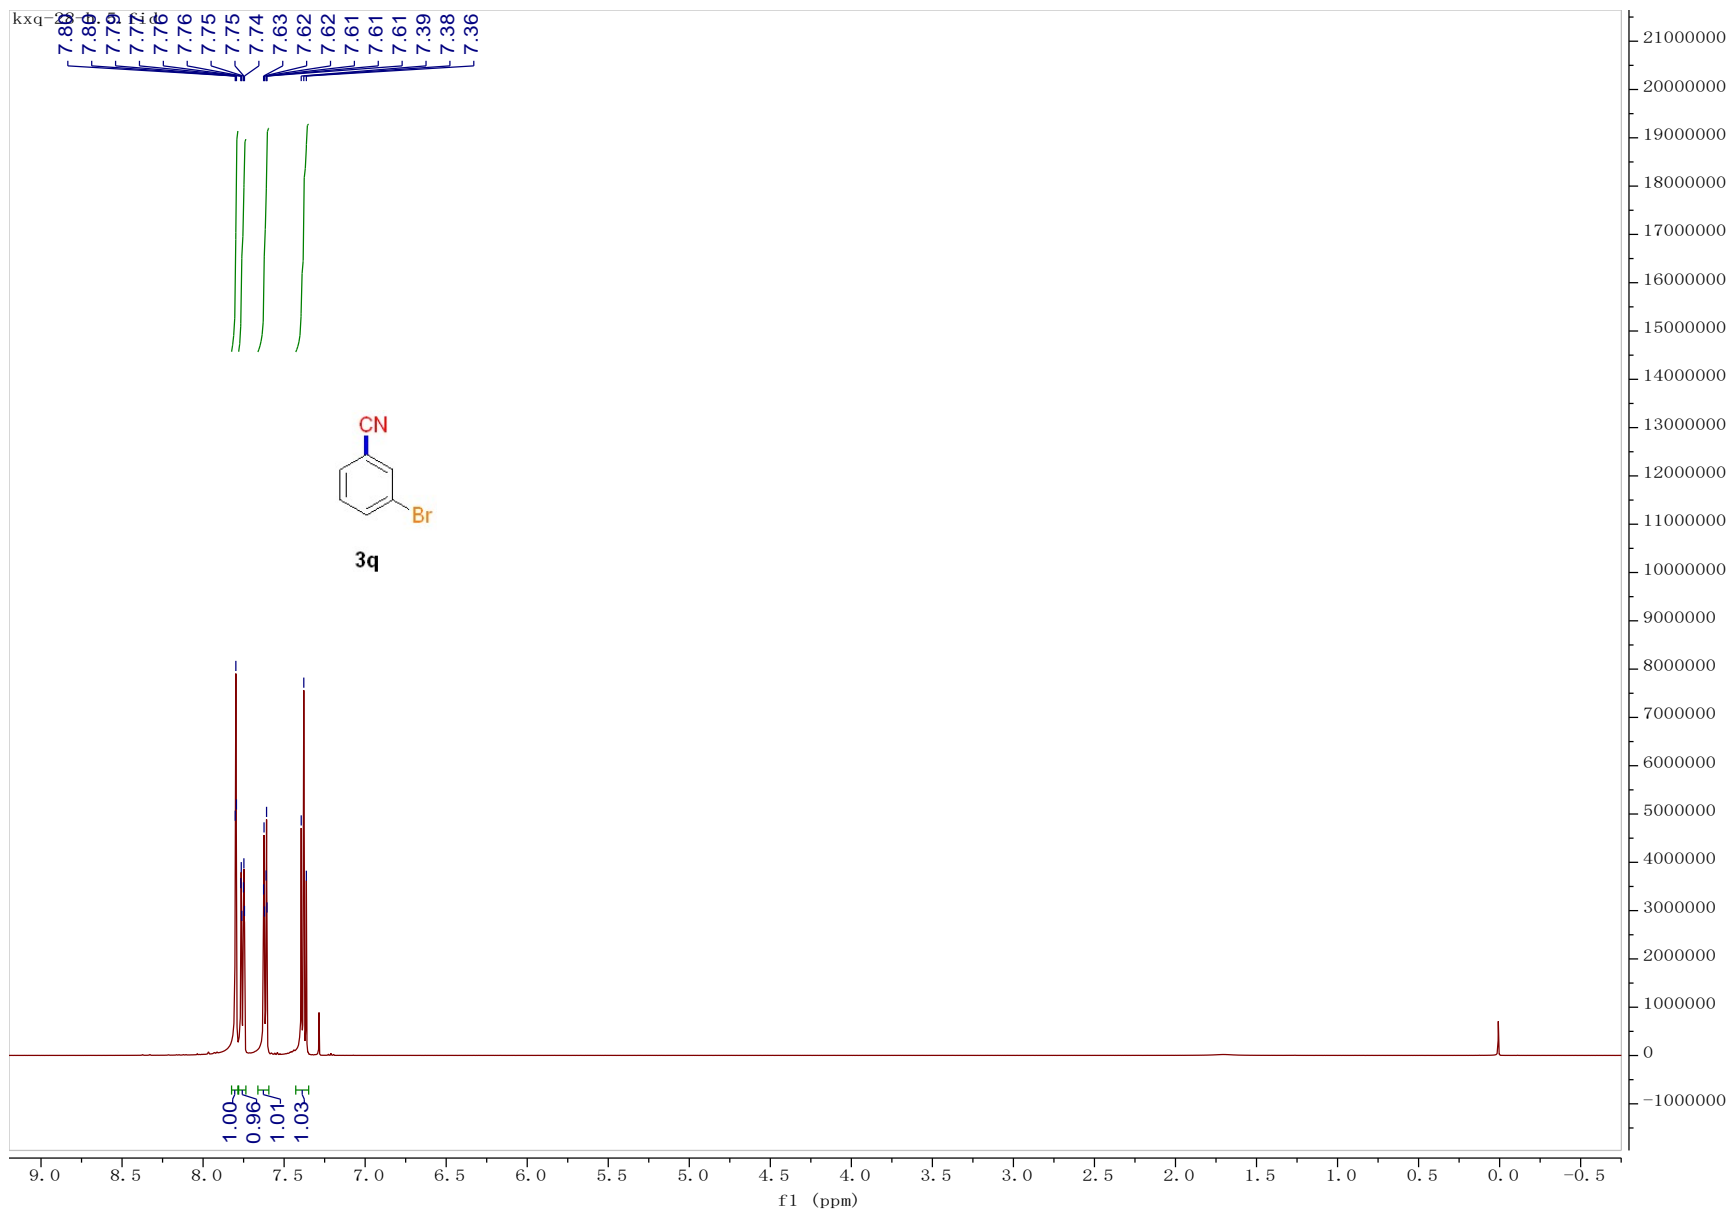

kxq-28-c13. 7. fid

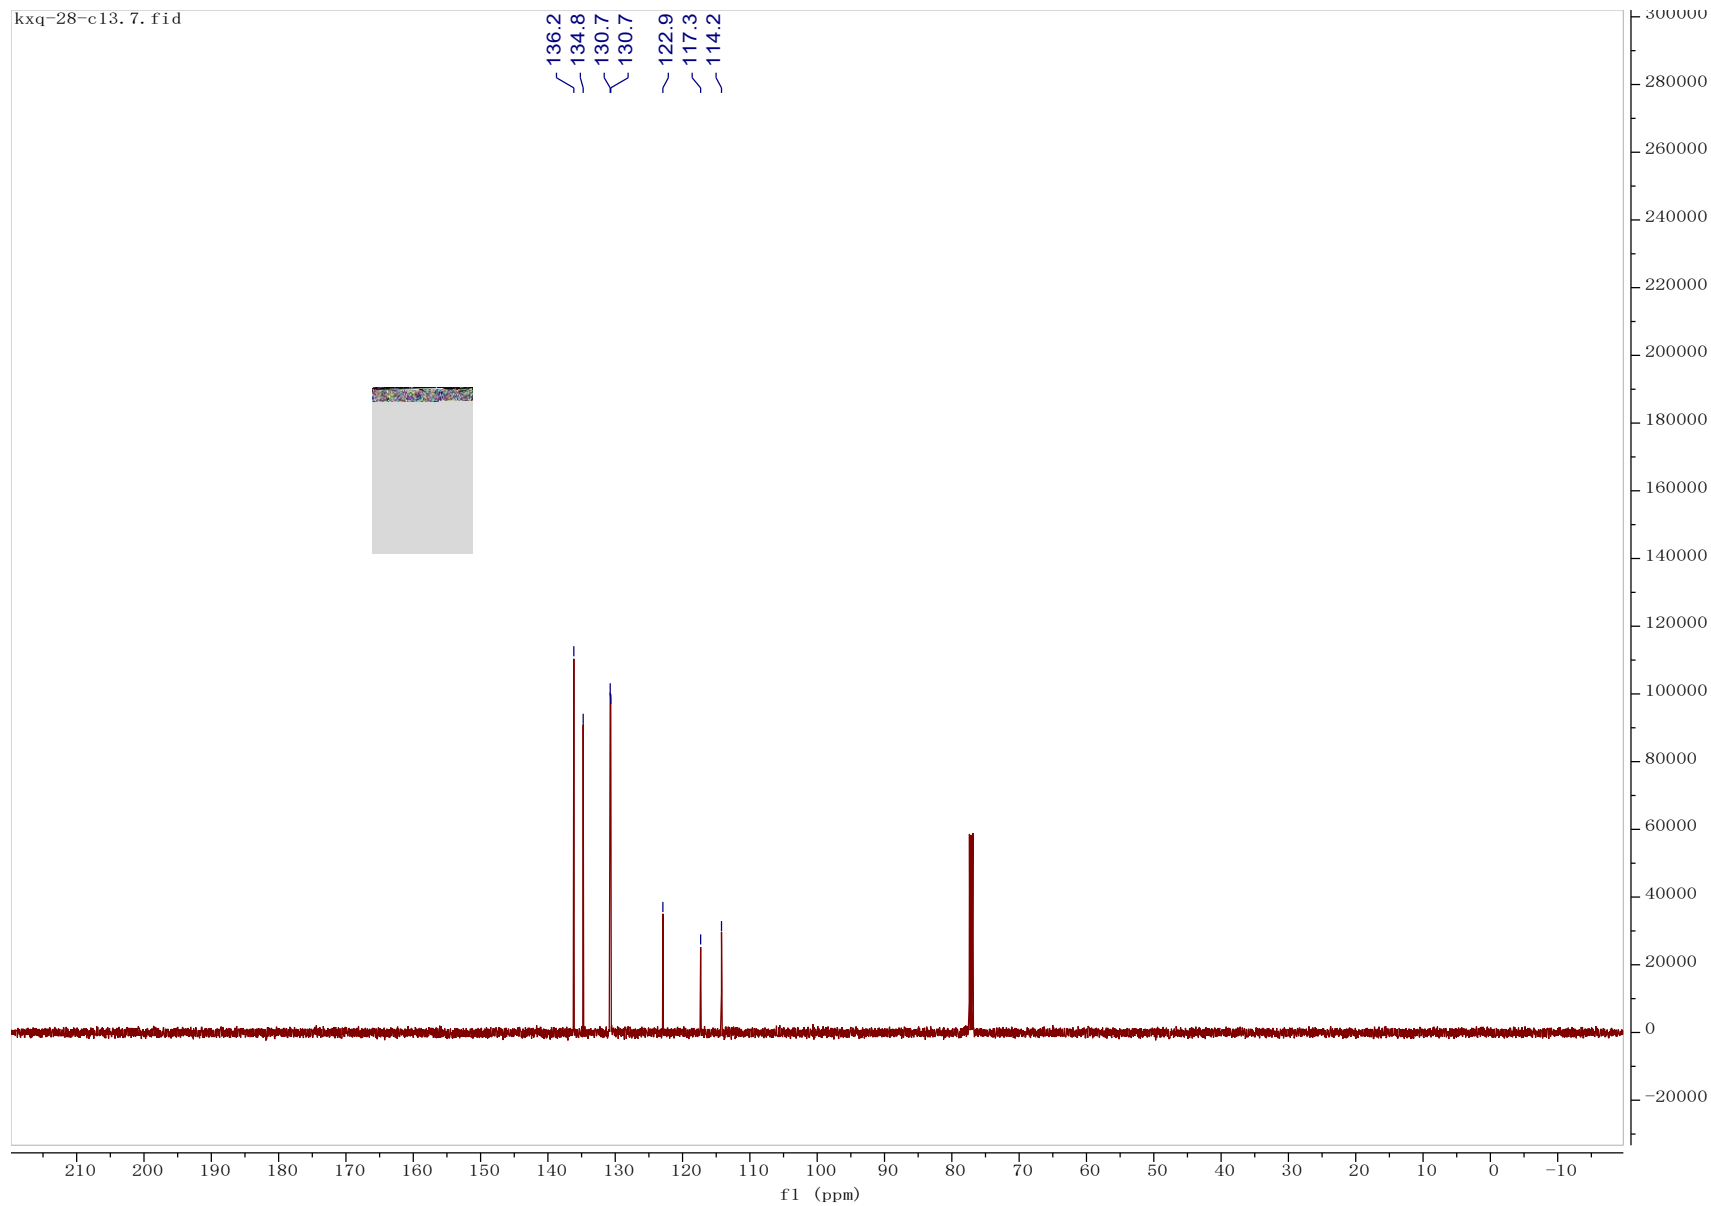

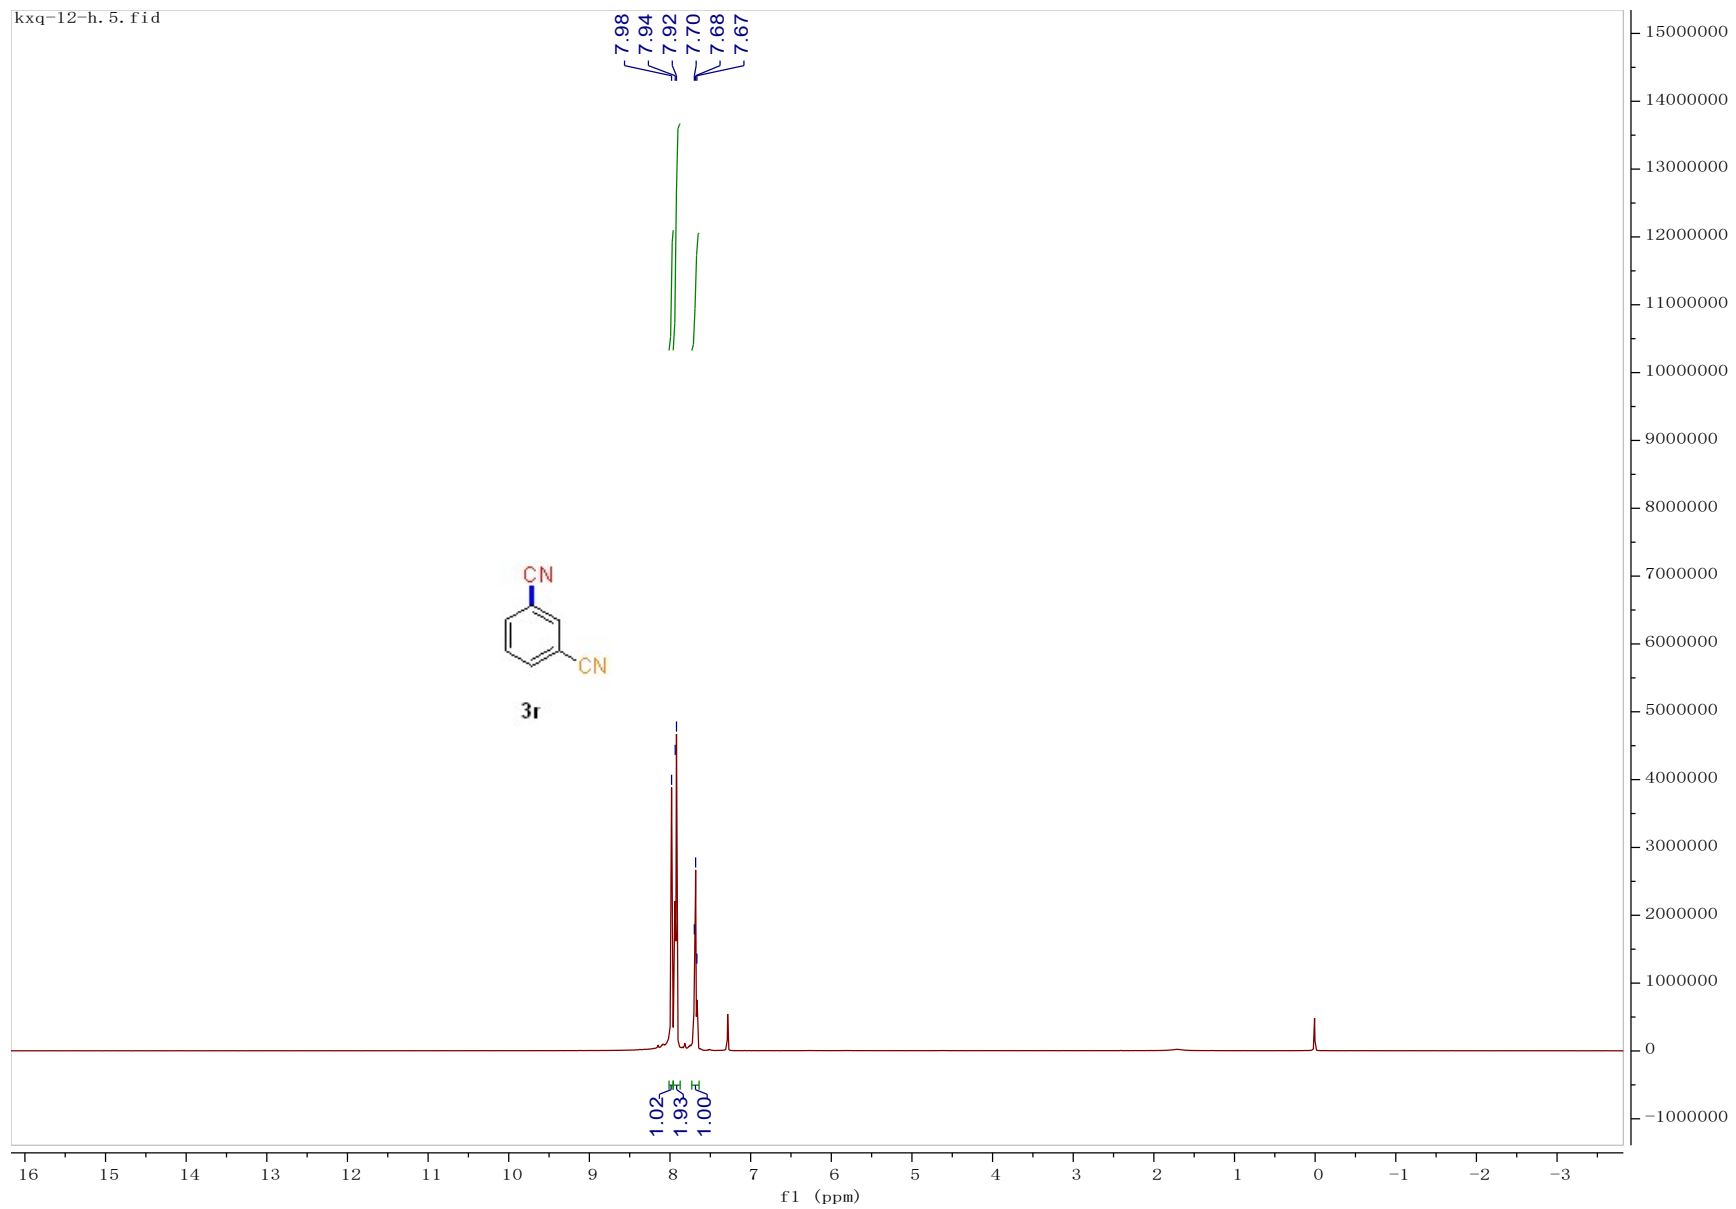

kxq-12-c13. 7. fid

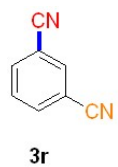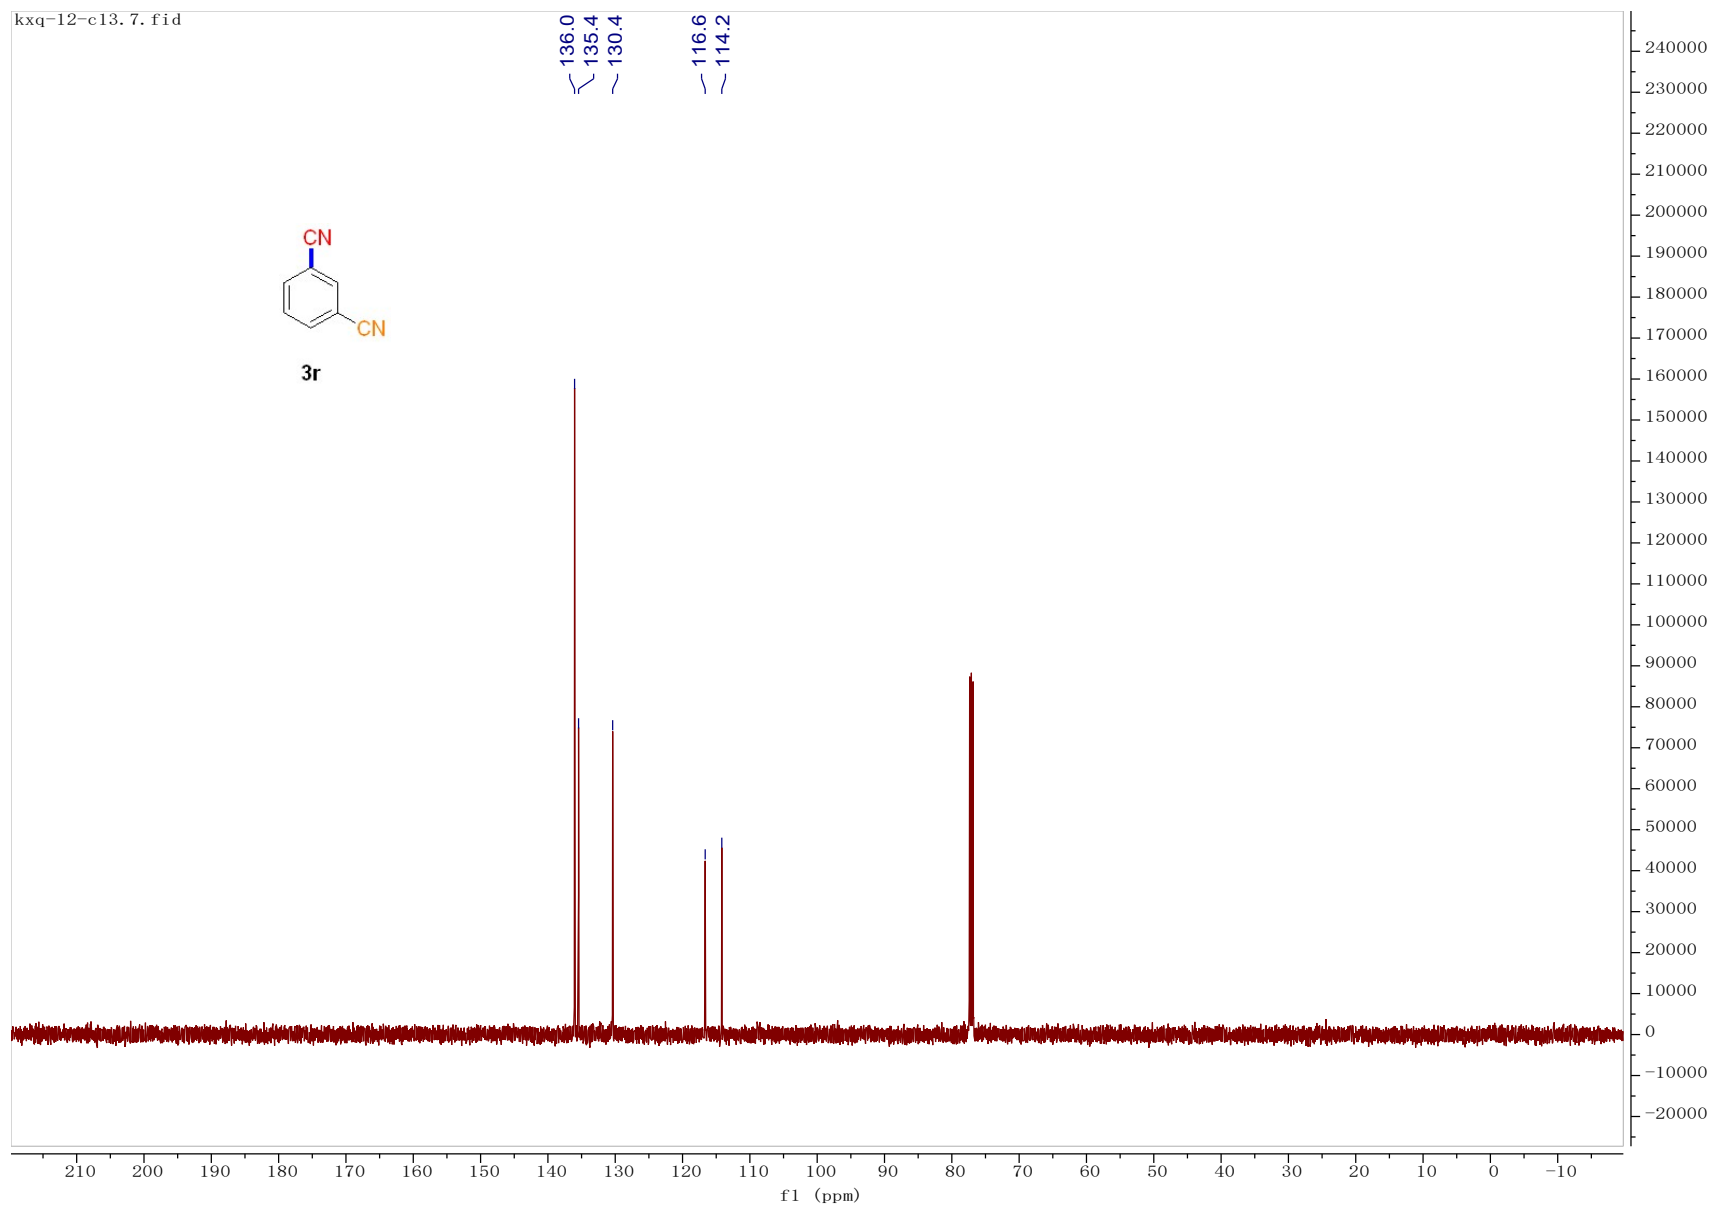

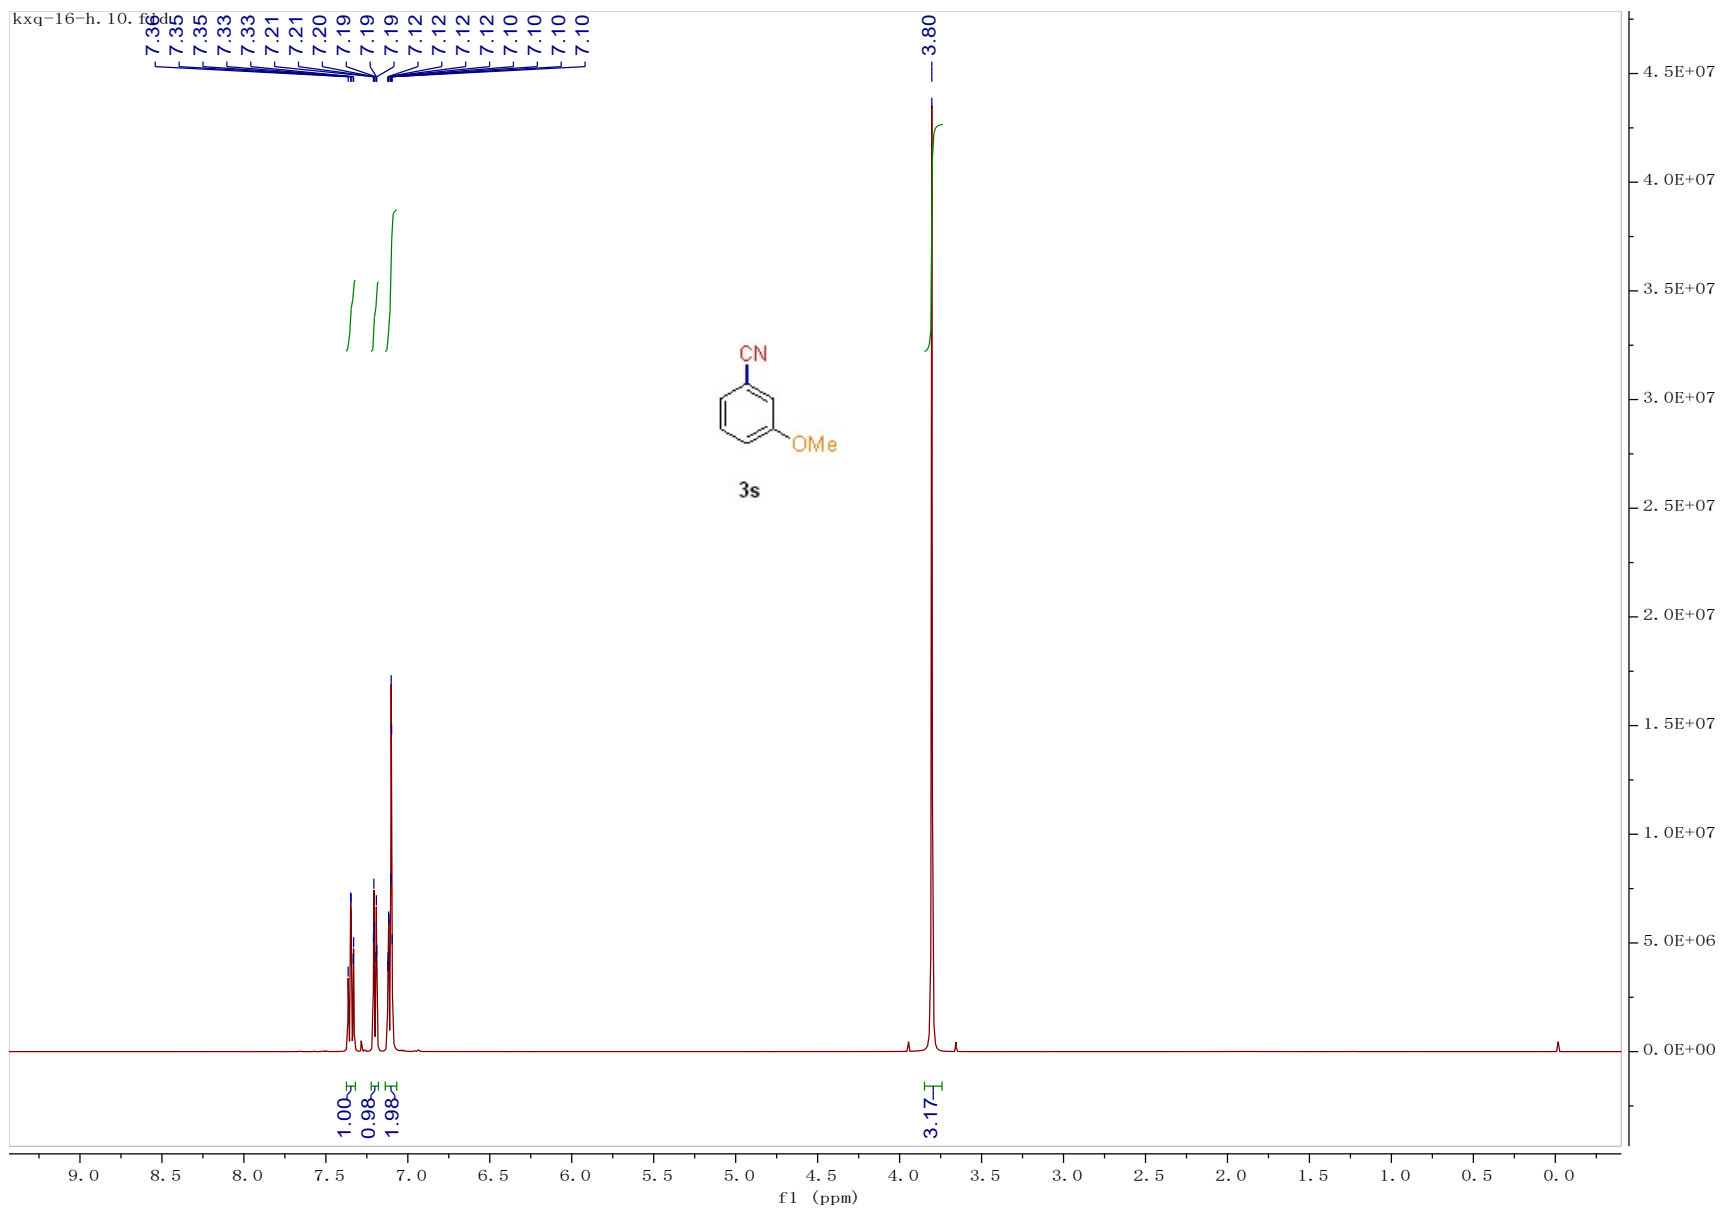

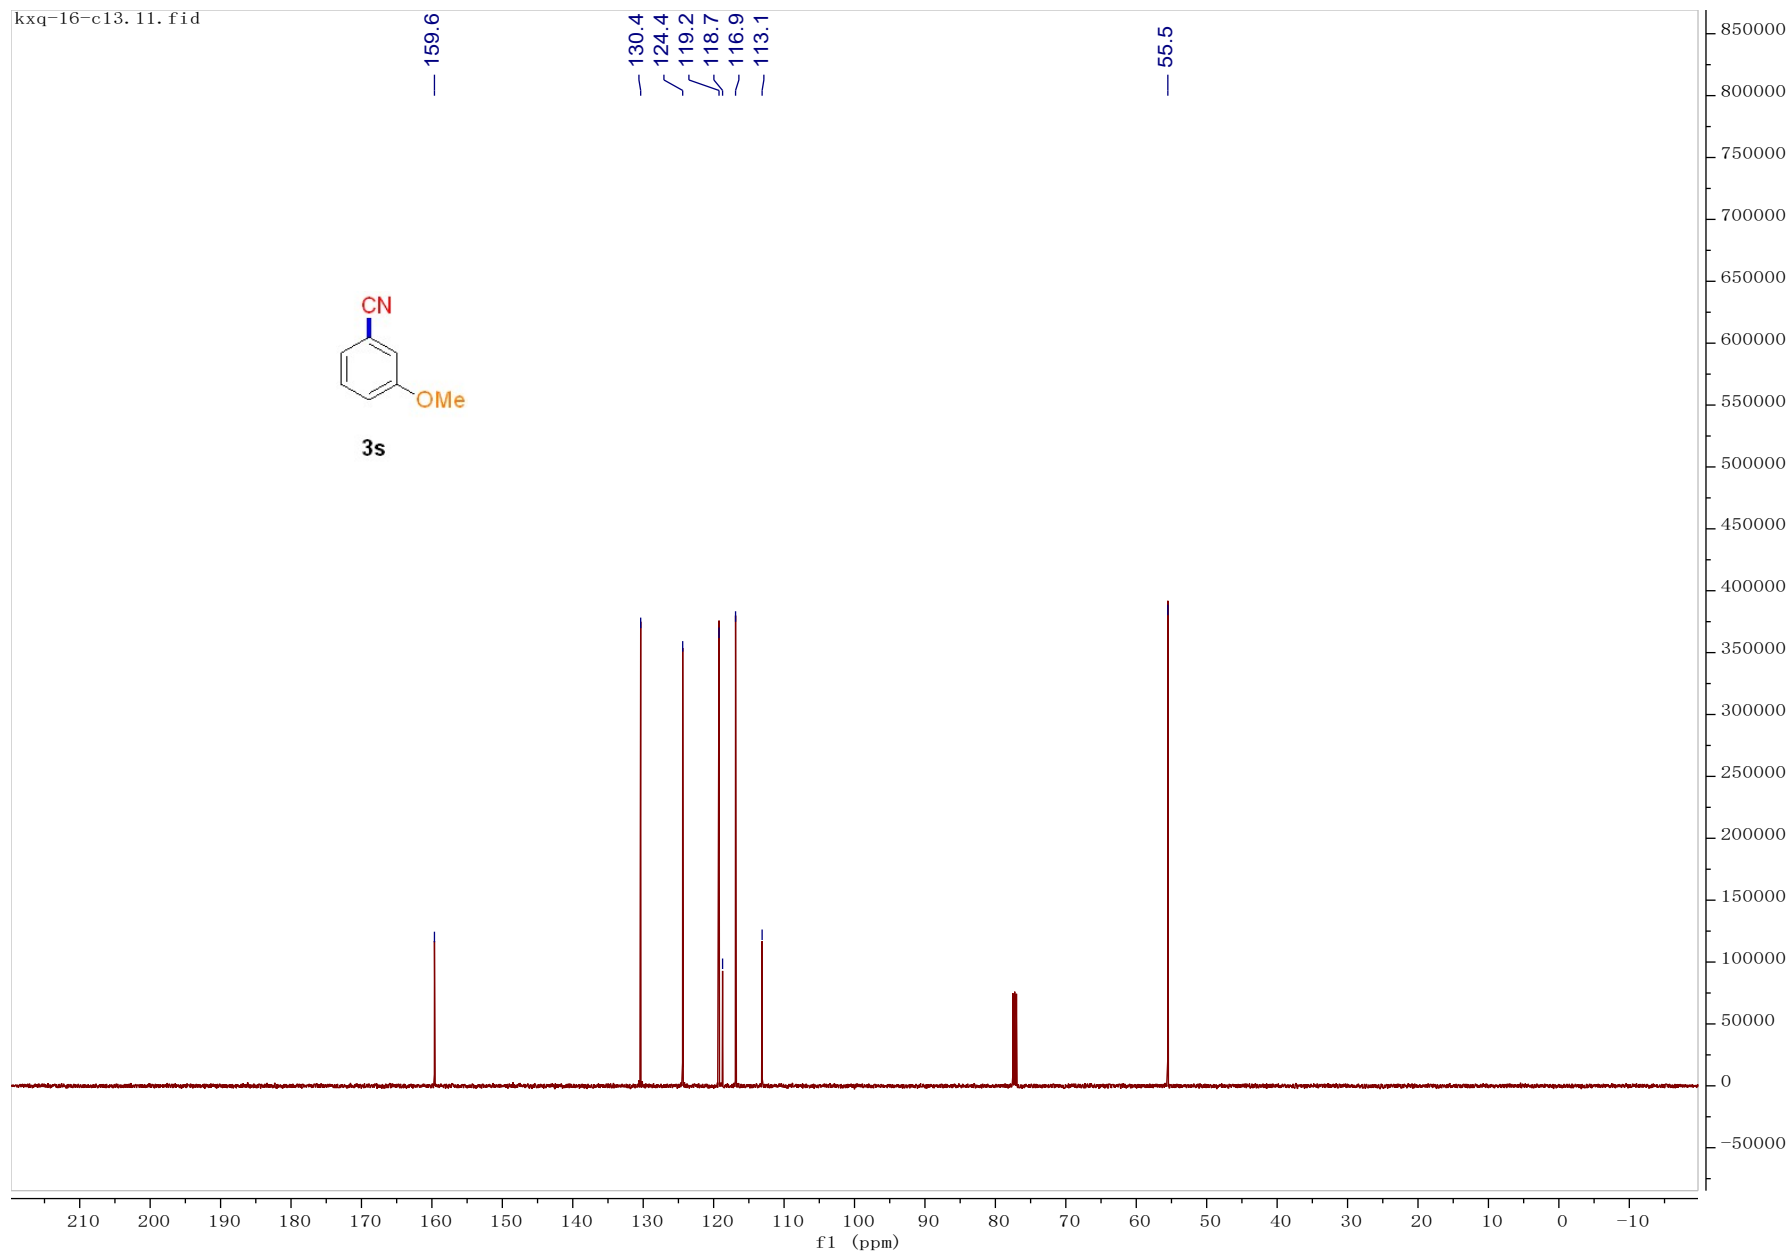

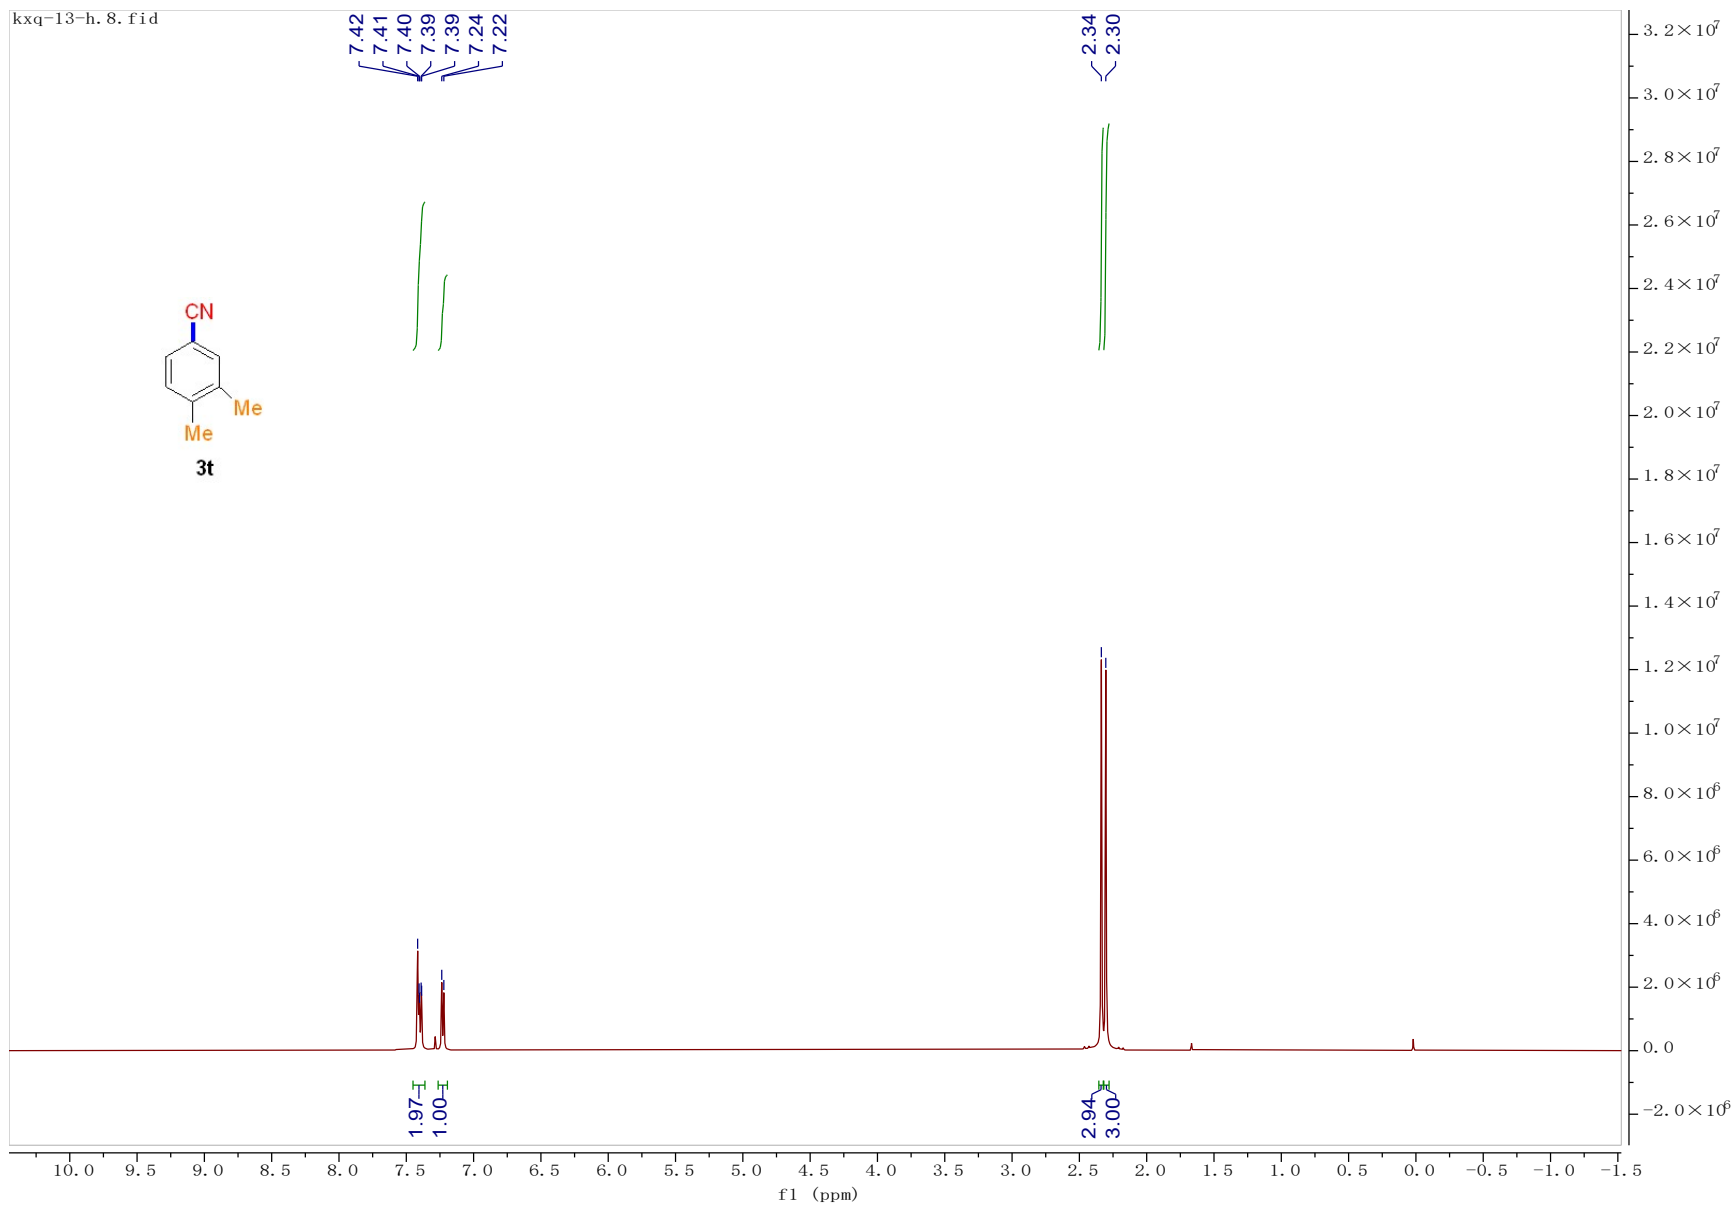



kxq-13-c13.9.fid

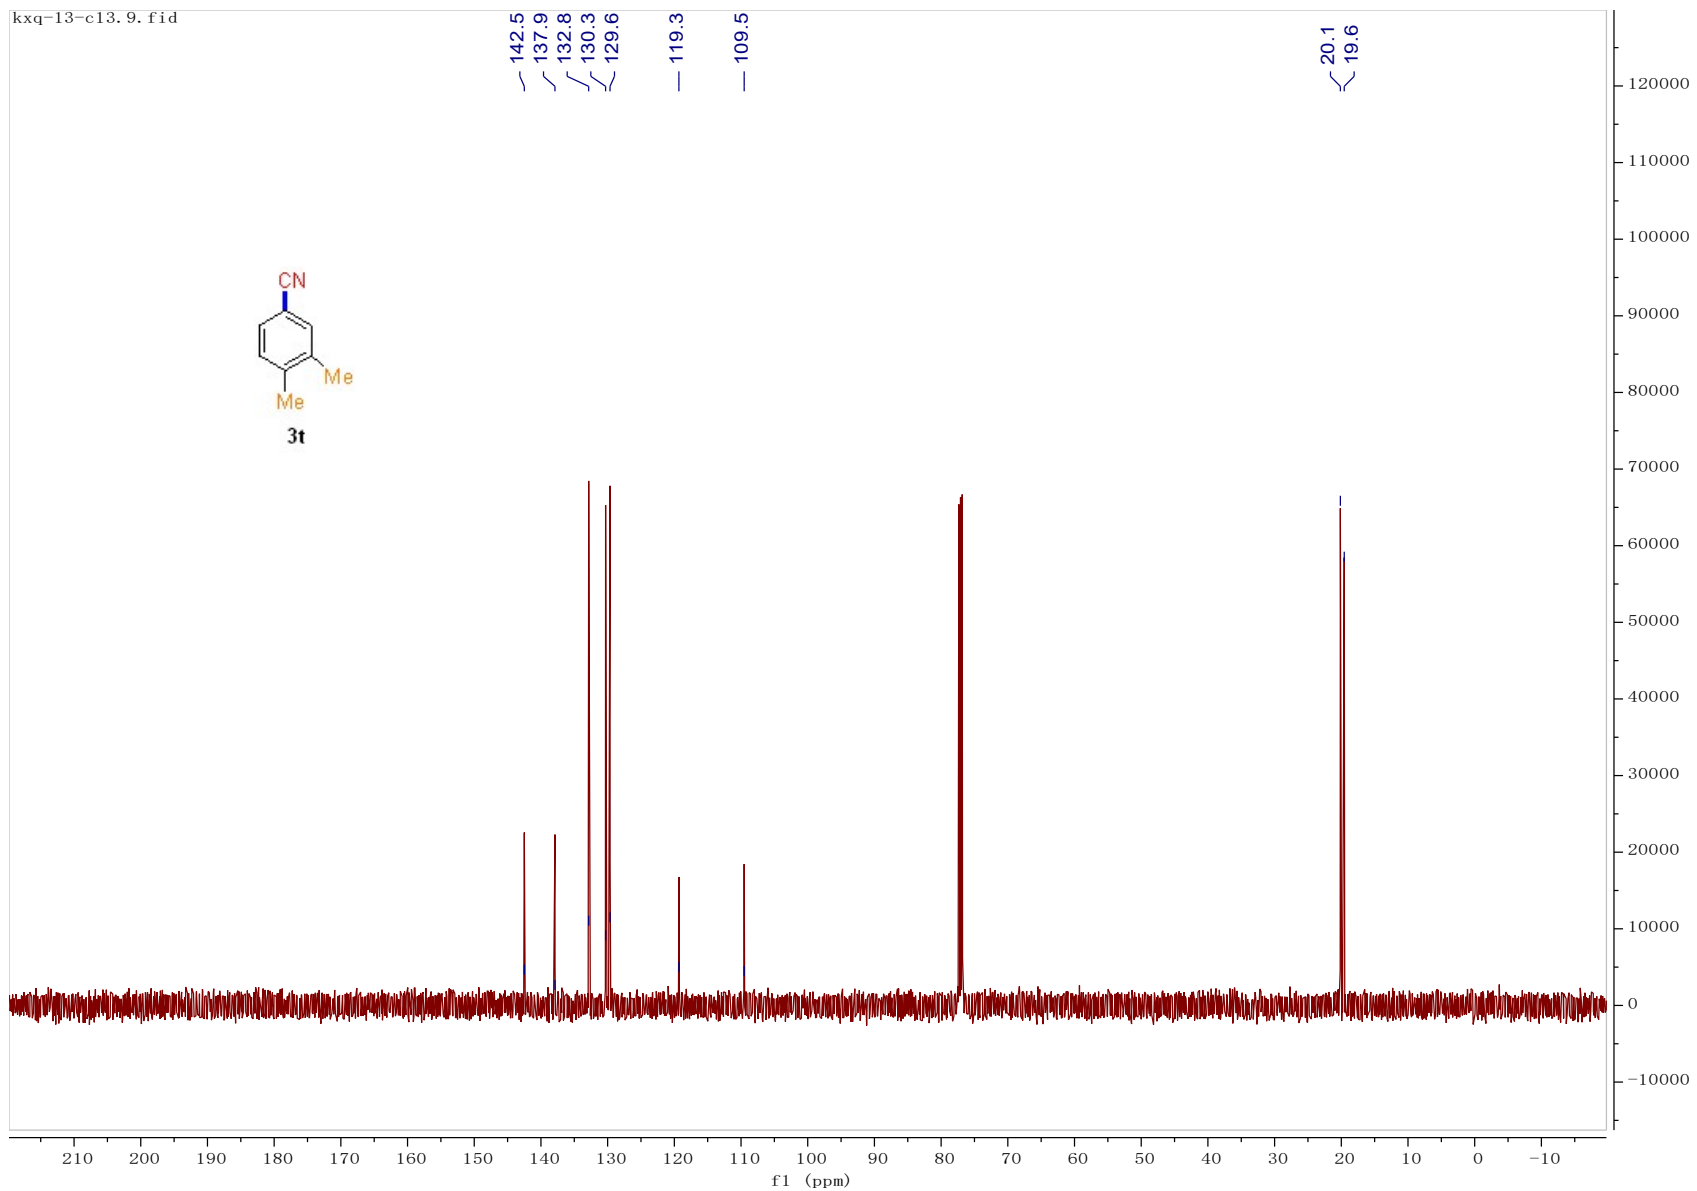

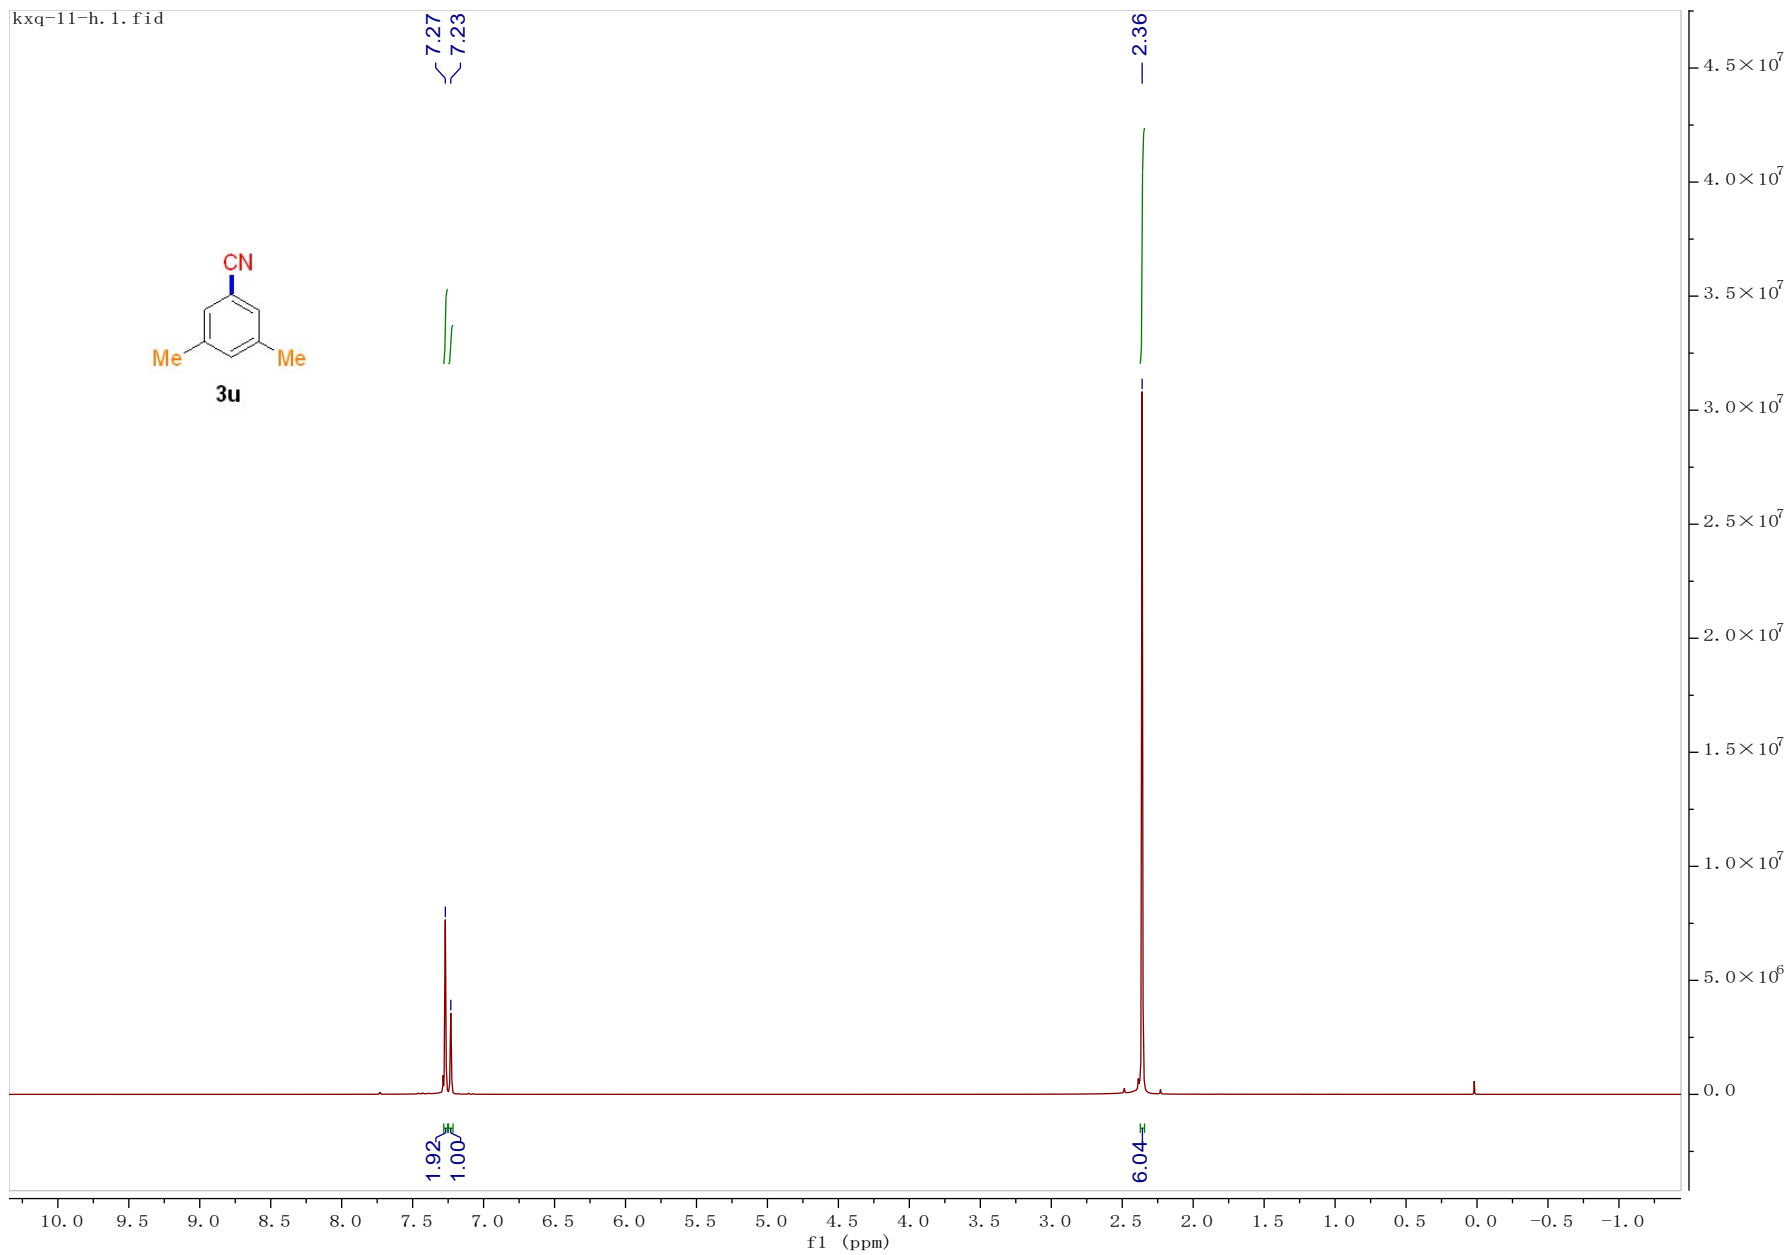

kxq-11-c13. 2. fid

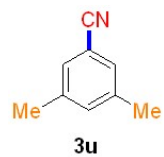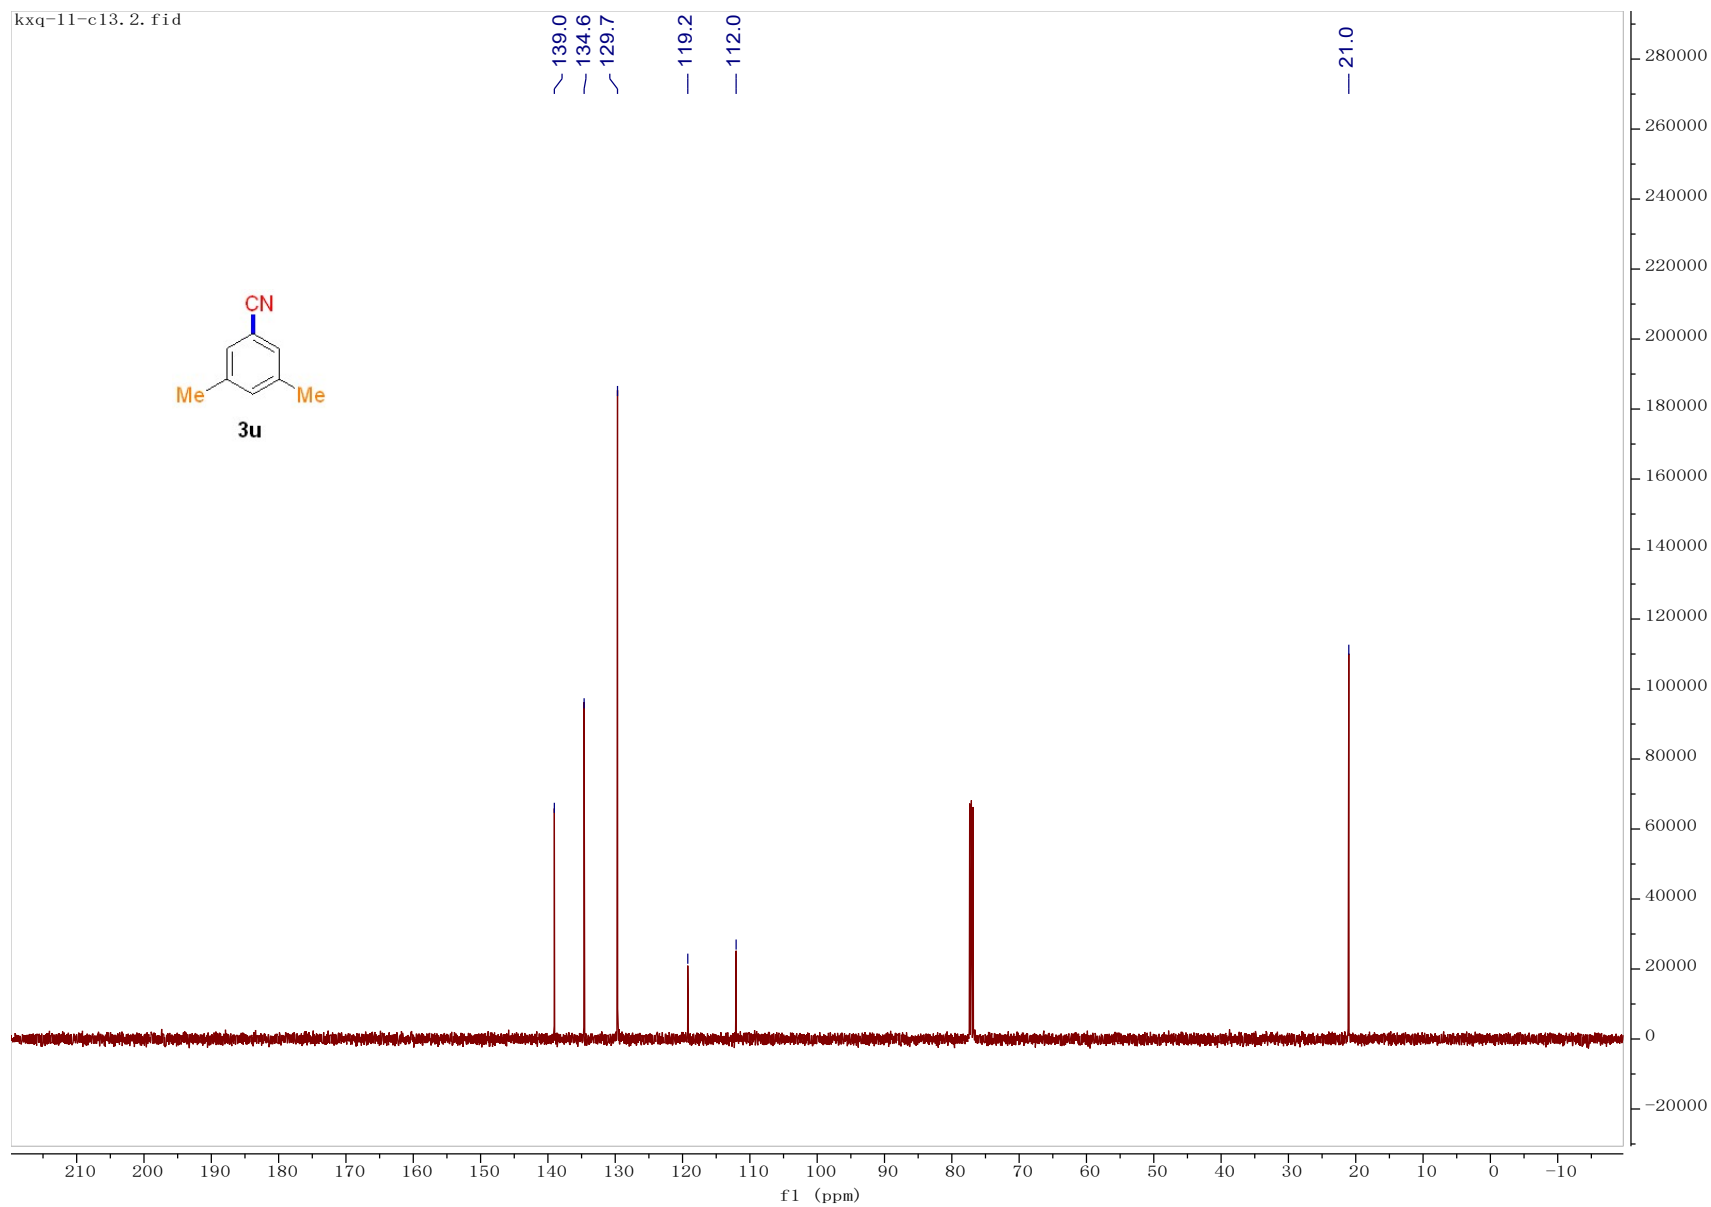

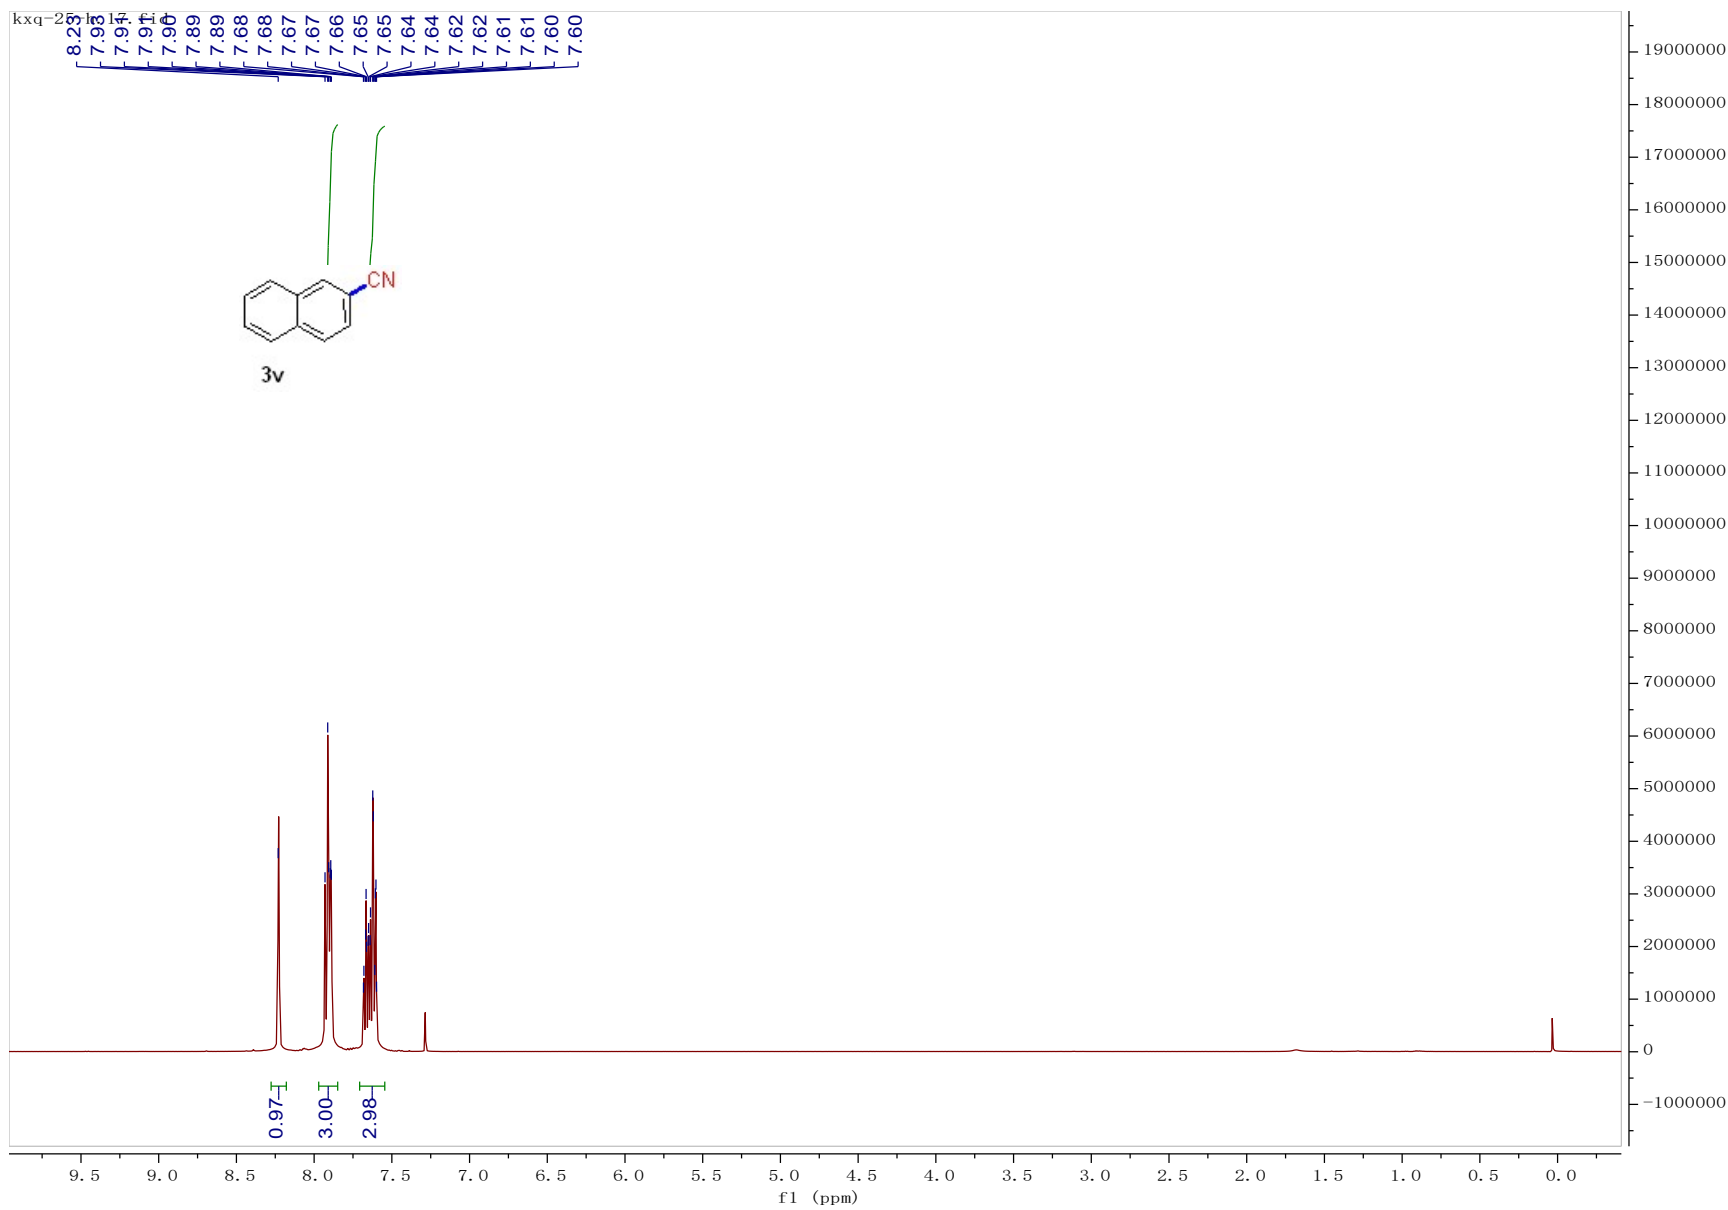

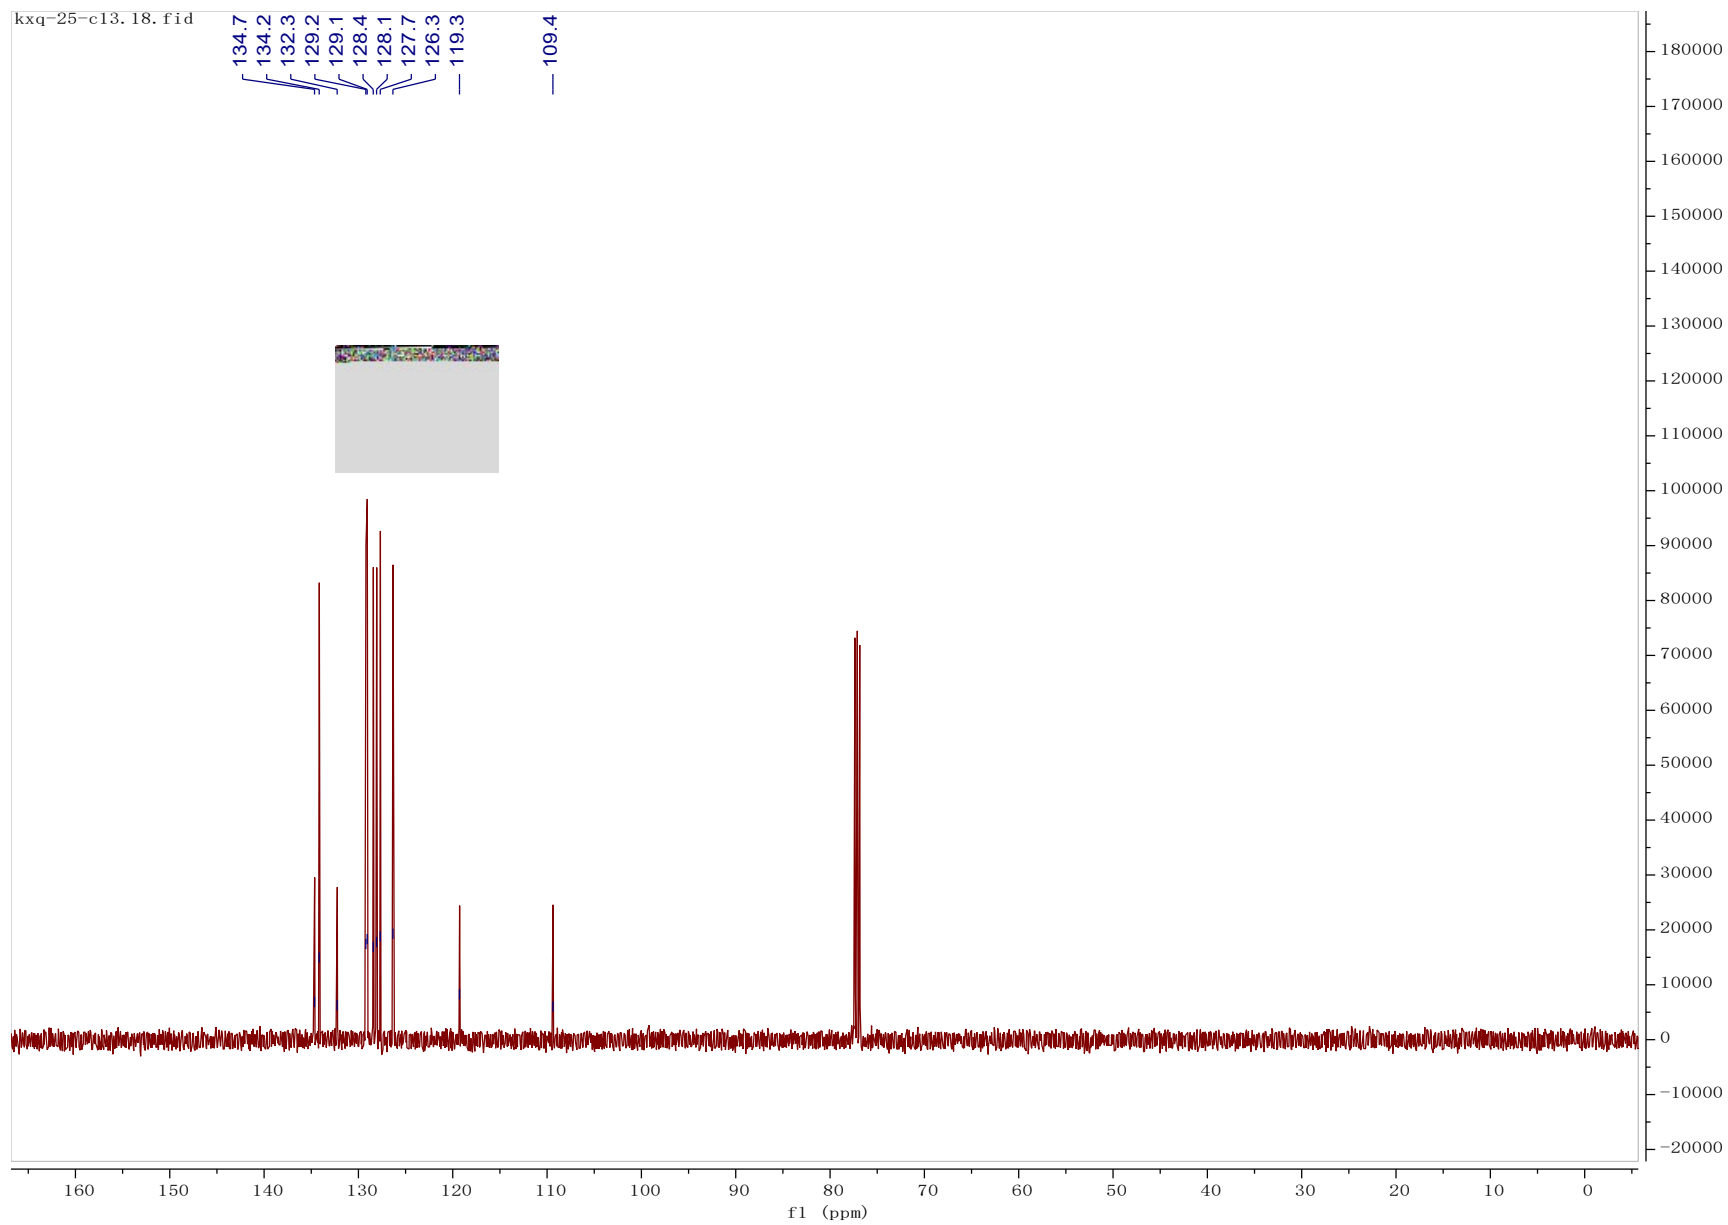

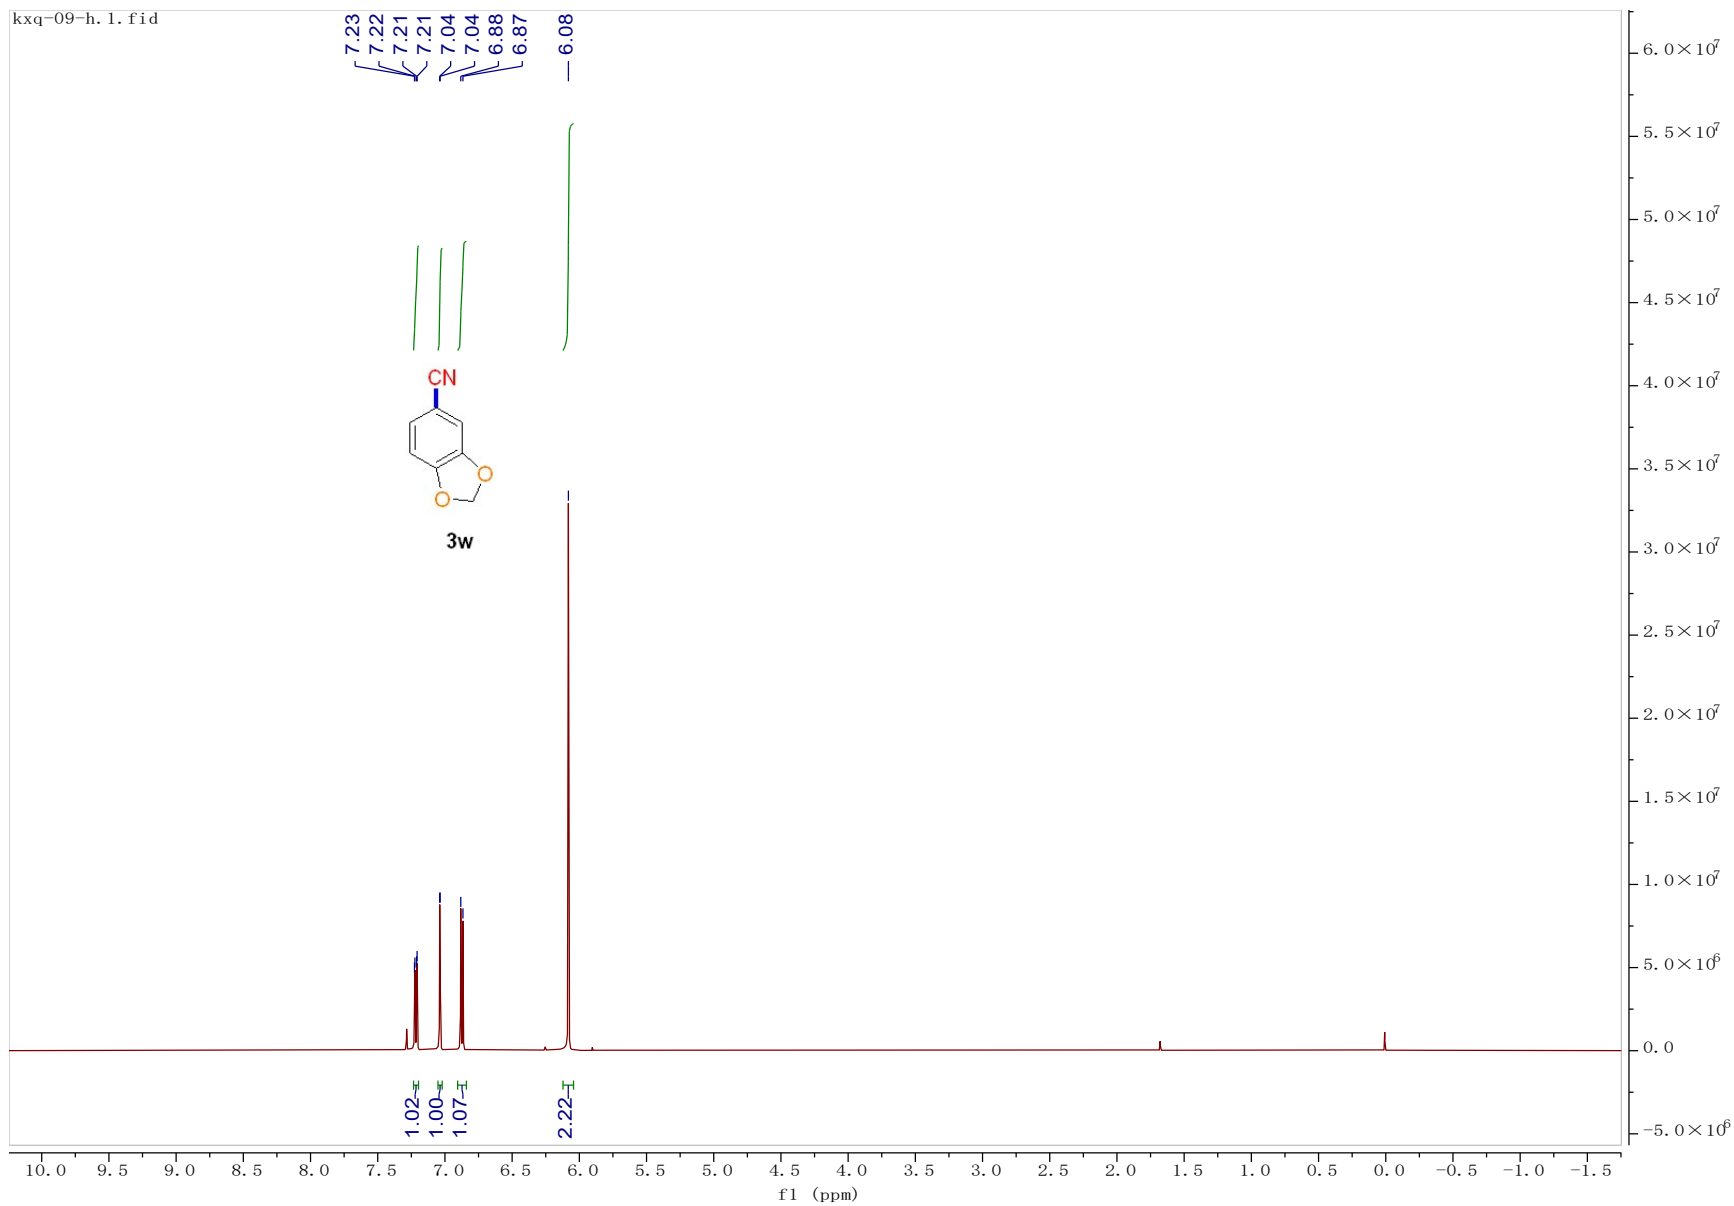

kxq-09-c13. 2. fid

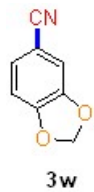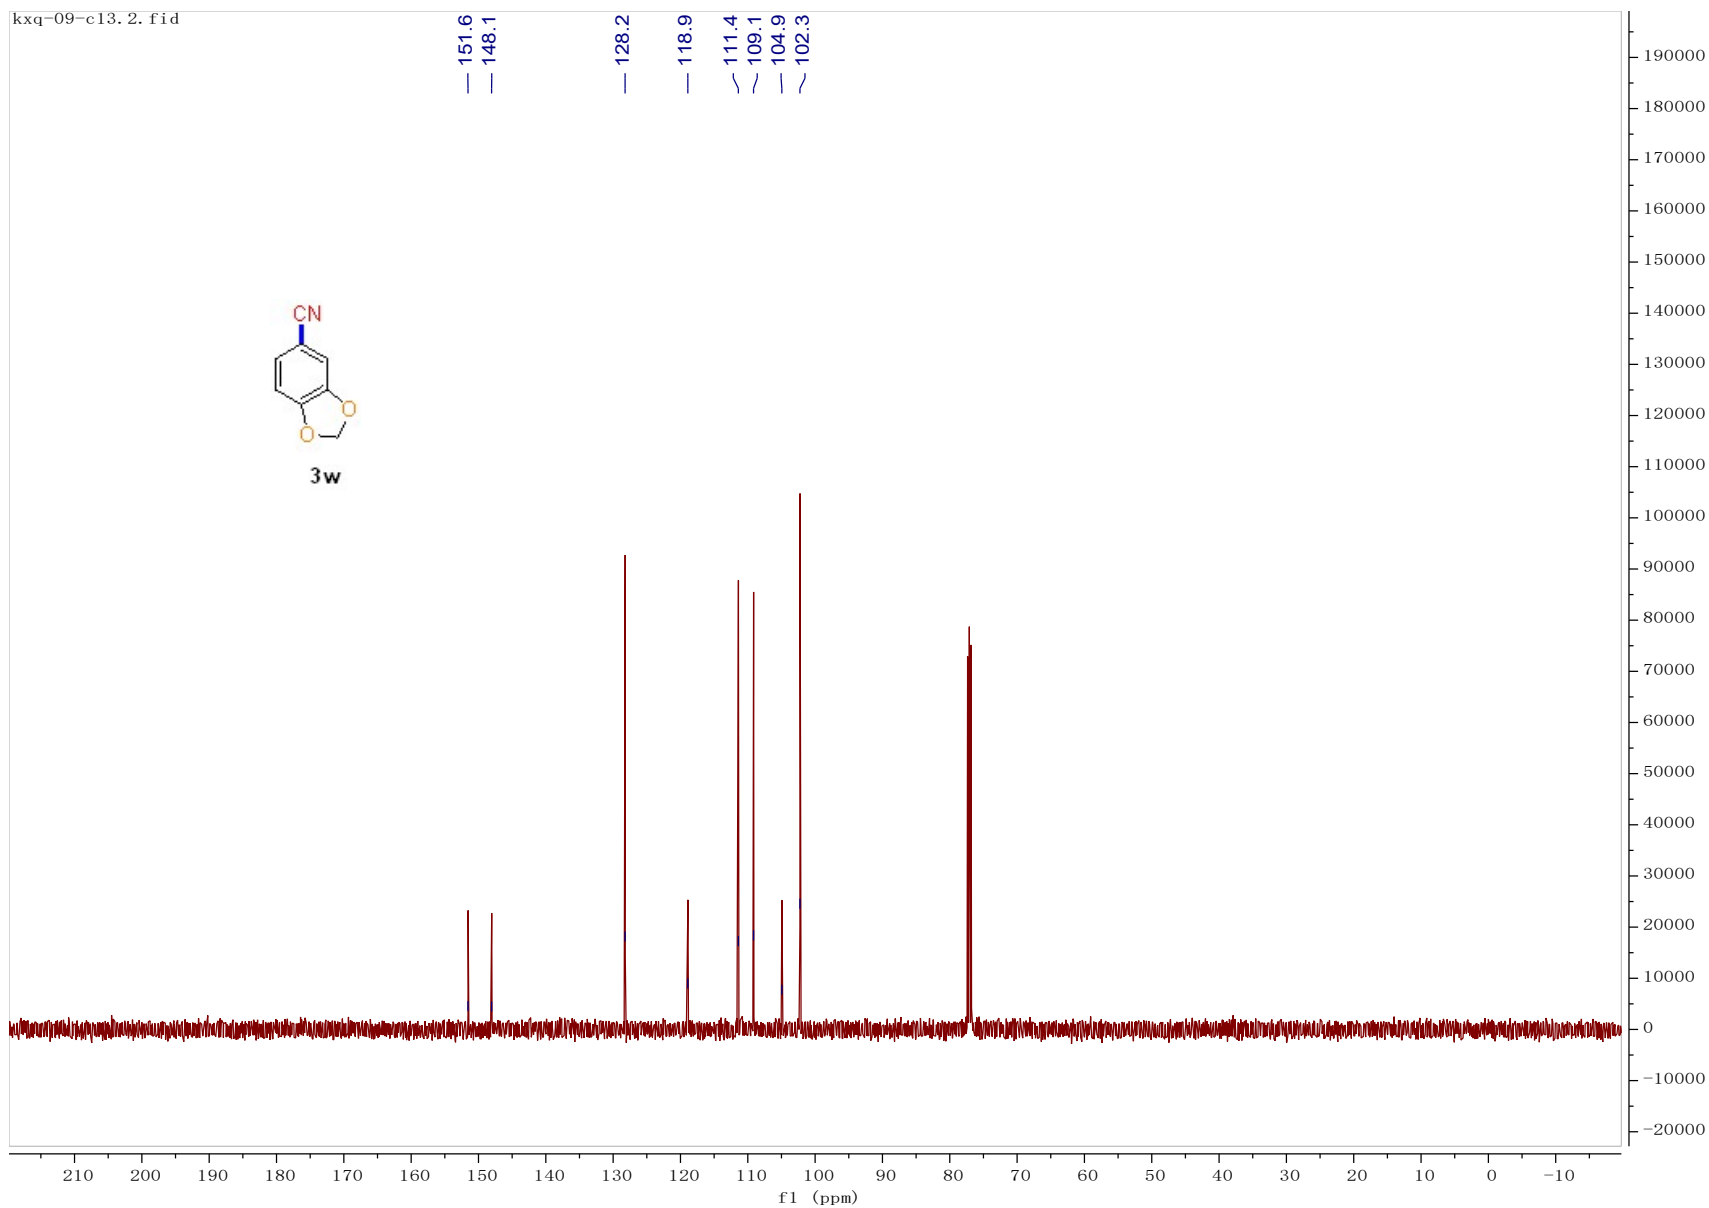

kxq-06-h. 13. fid

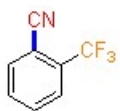

3x

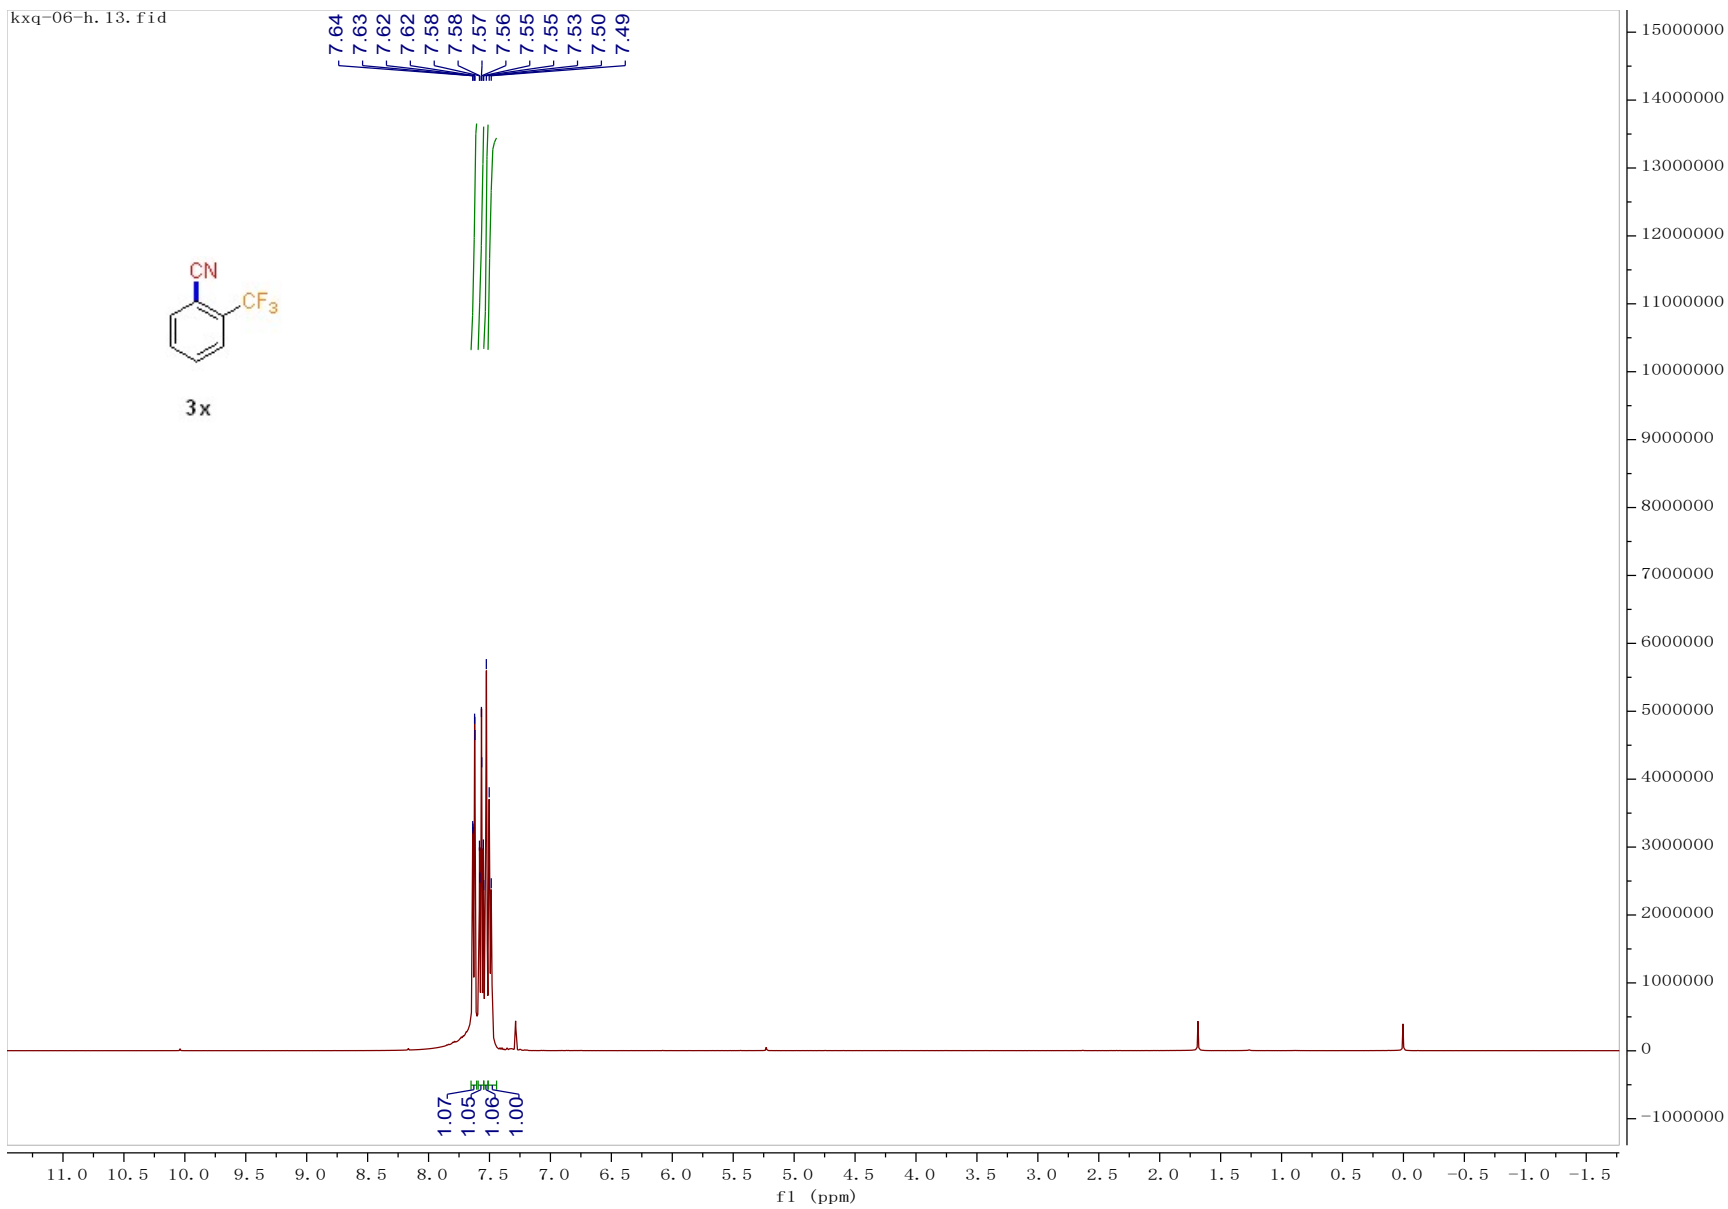



kxq-06-f19.15.fid

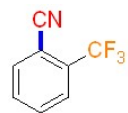

3x

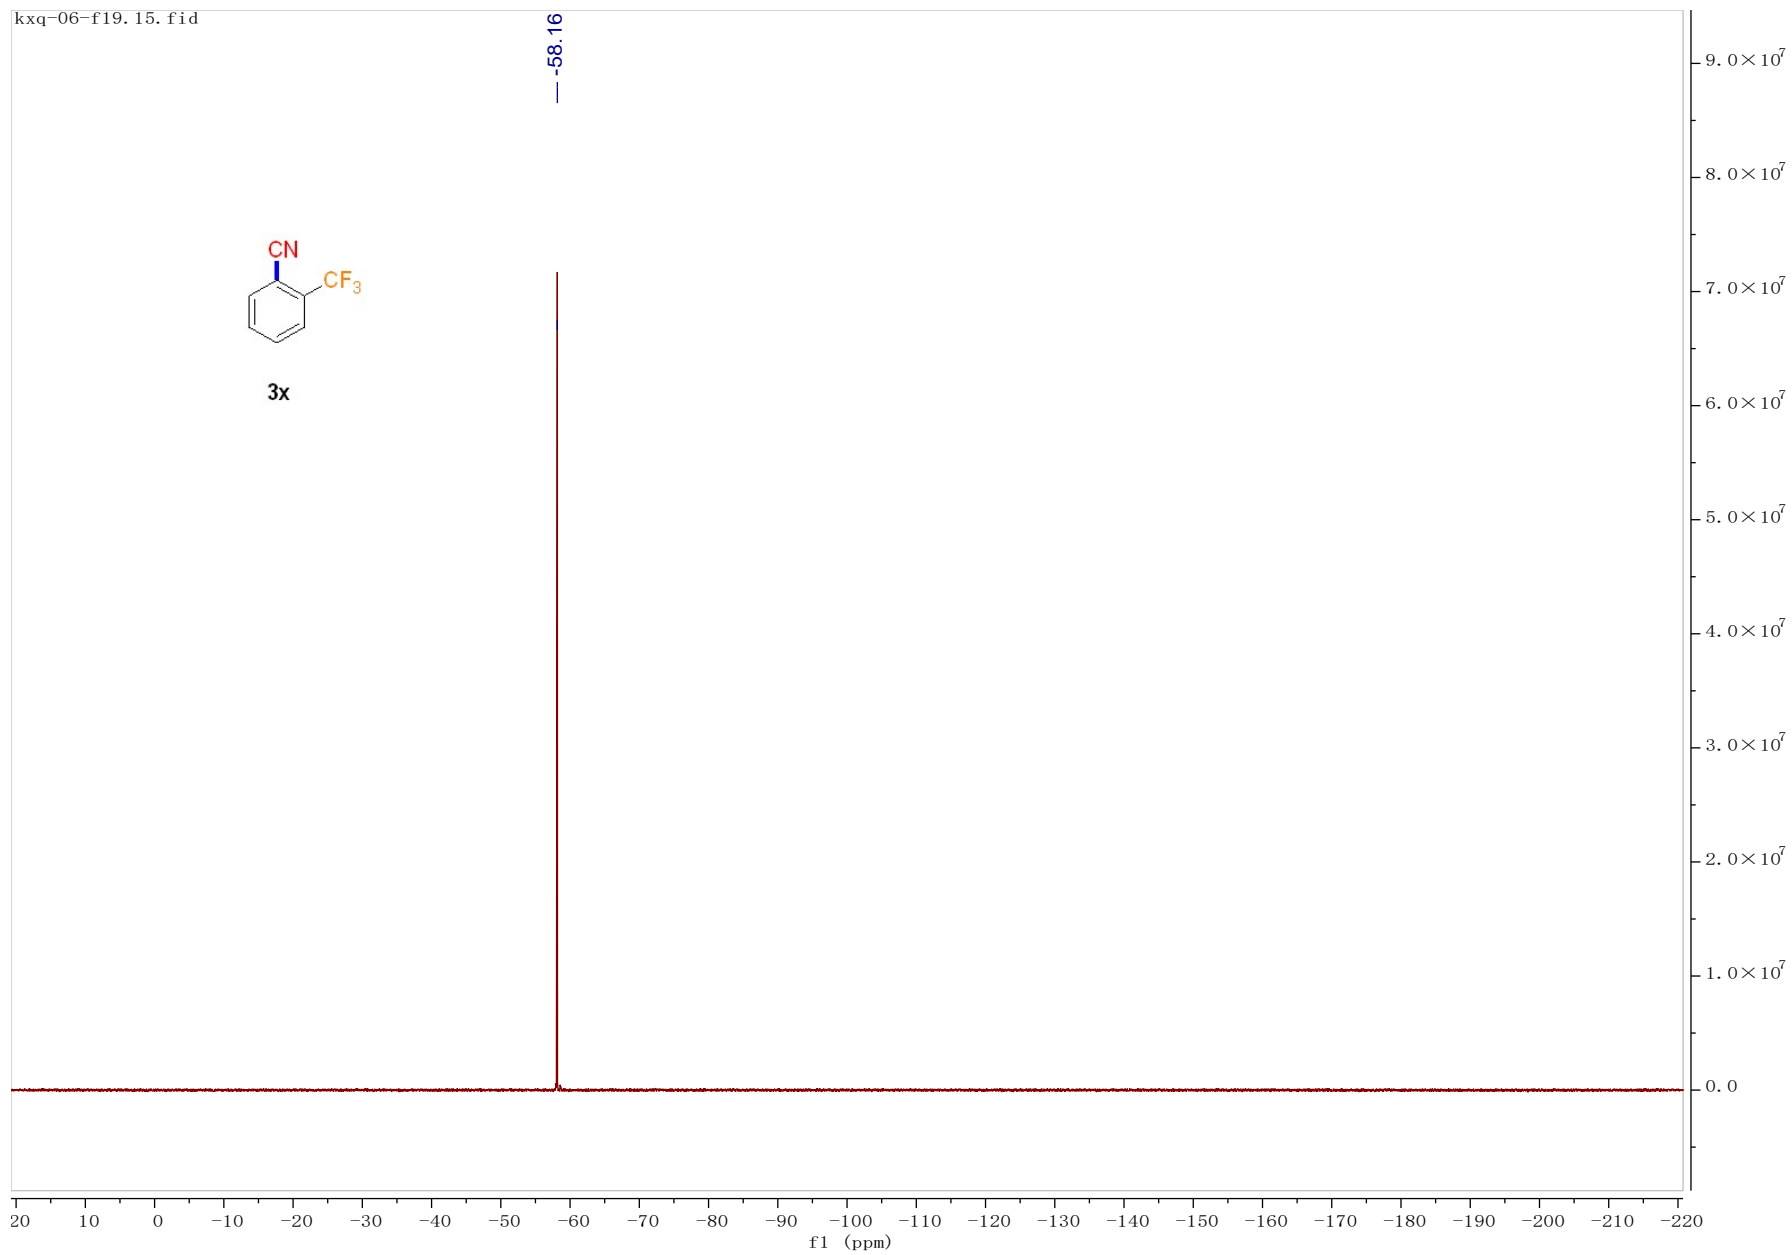

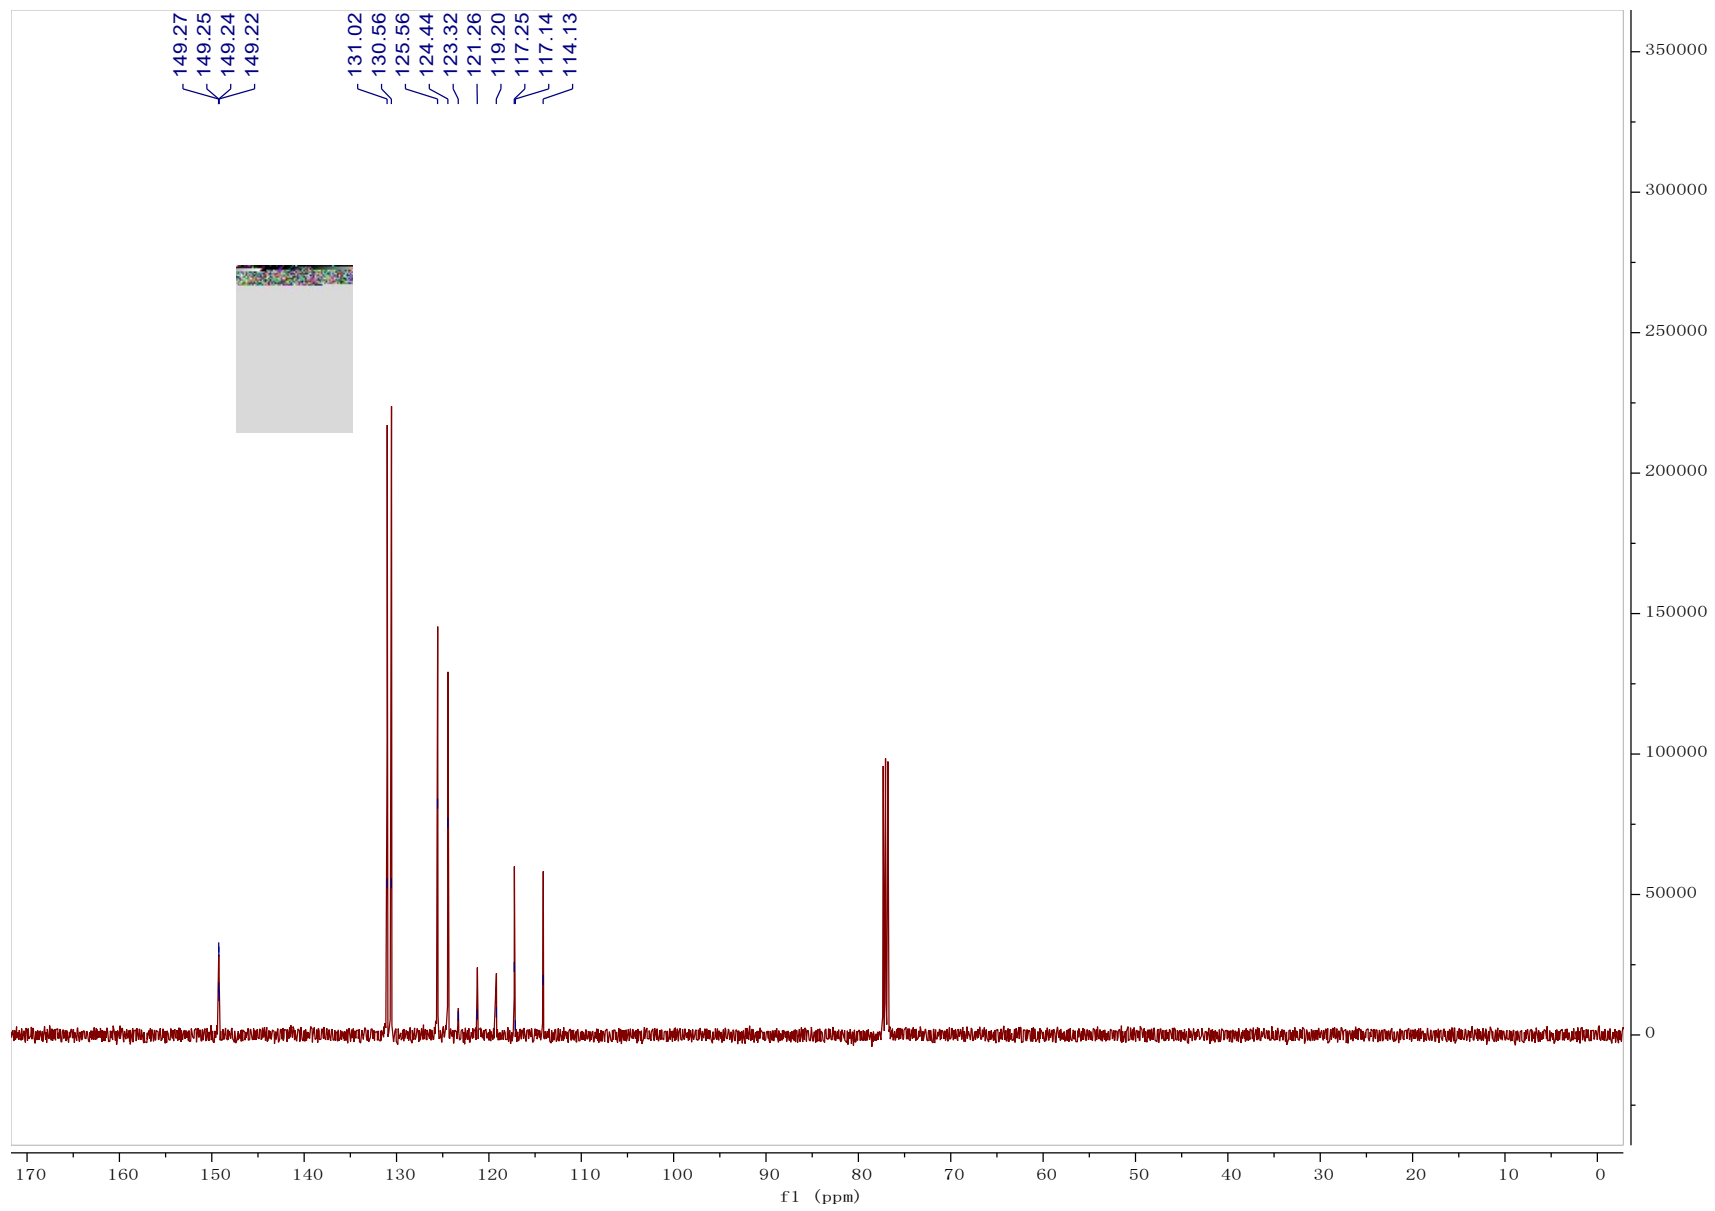

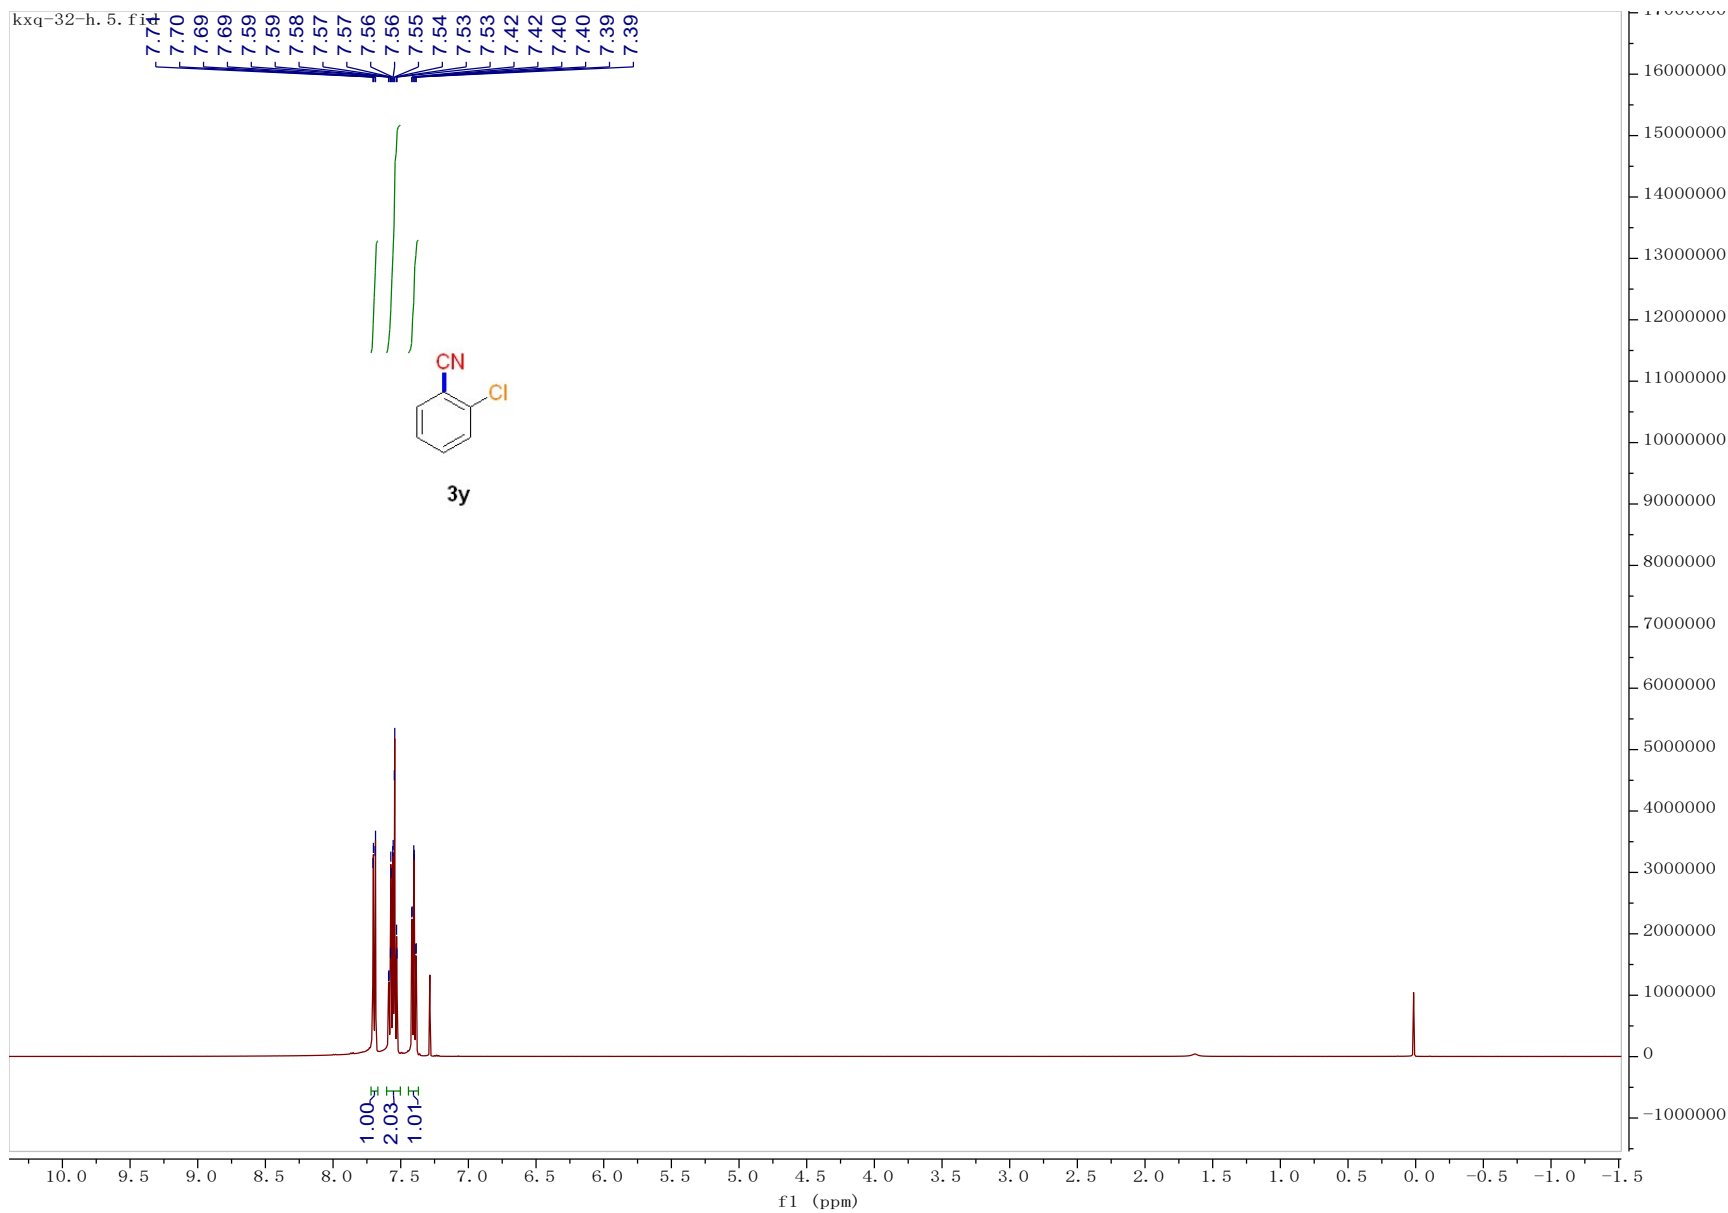

kxq-32-c13.6.fid

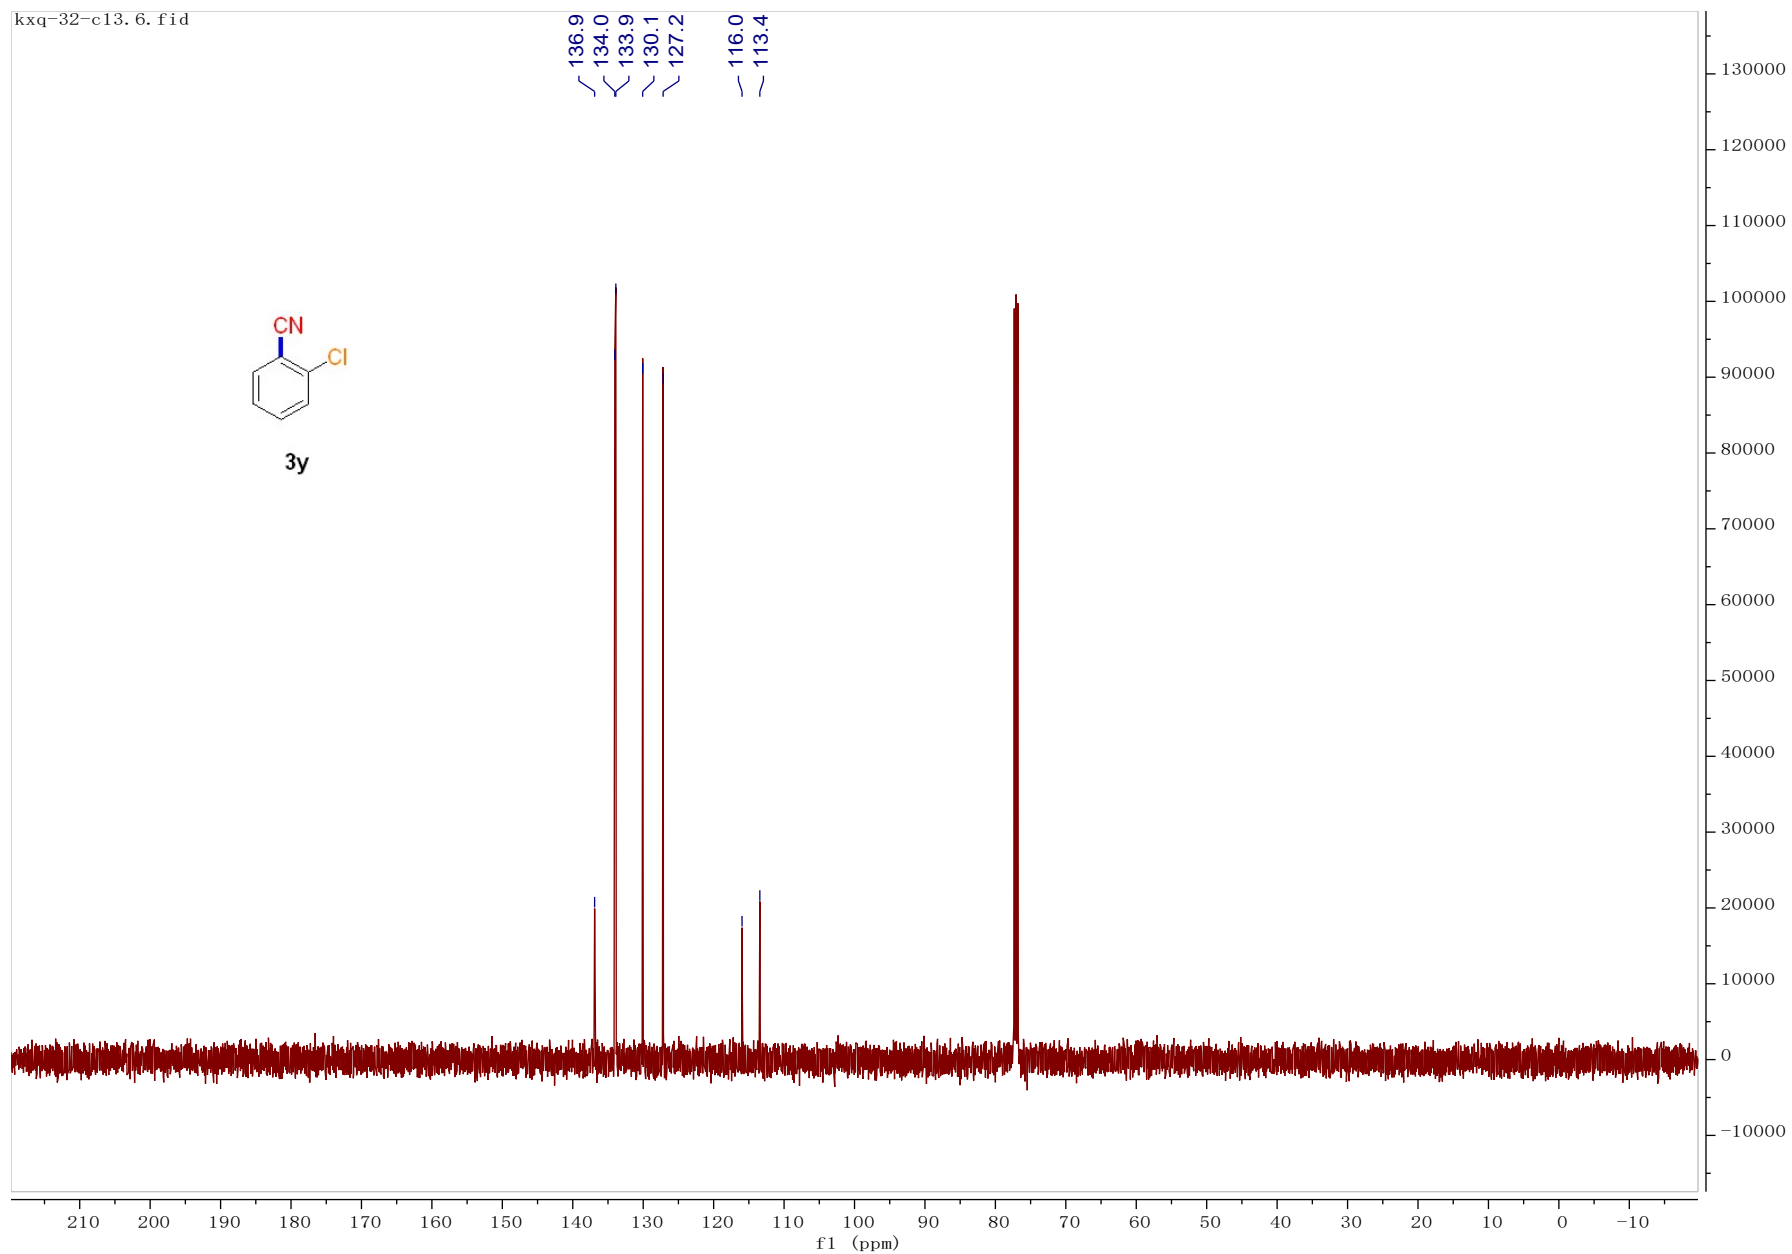

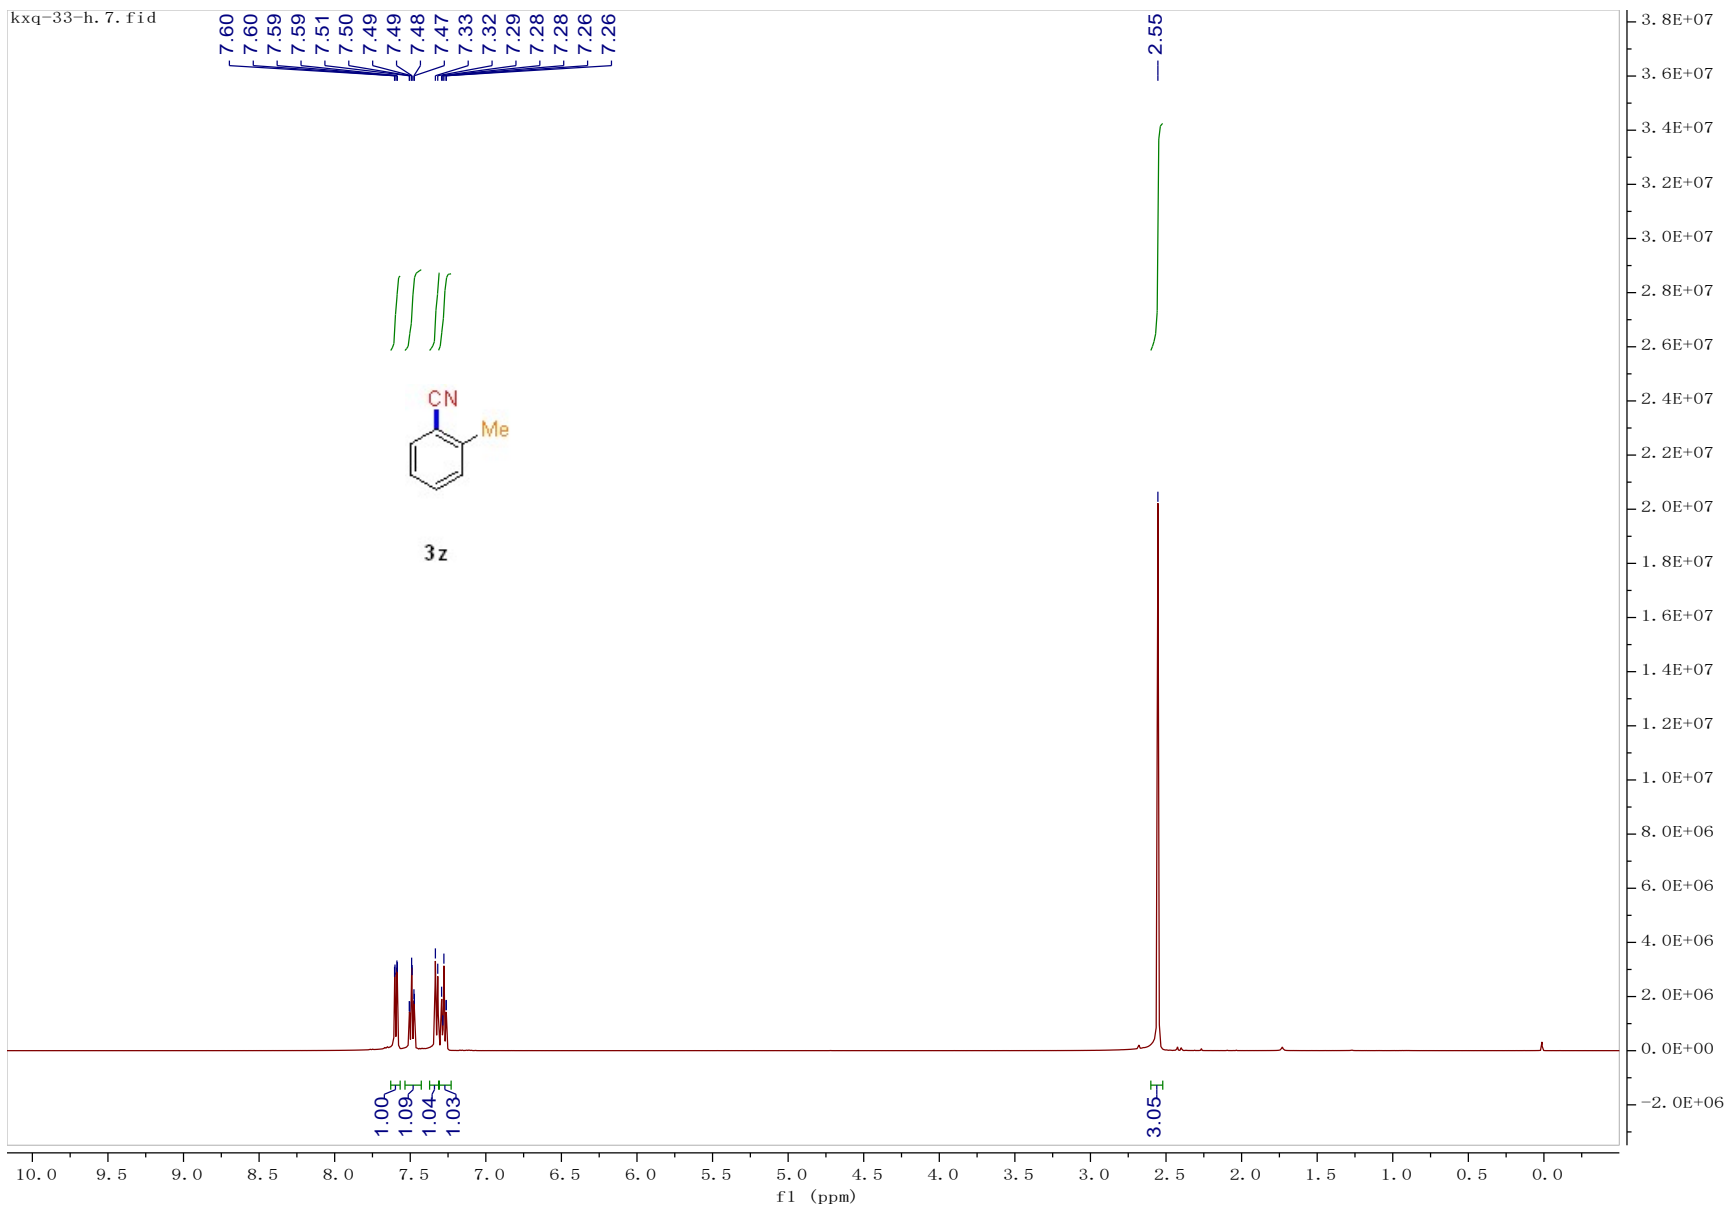

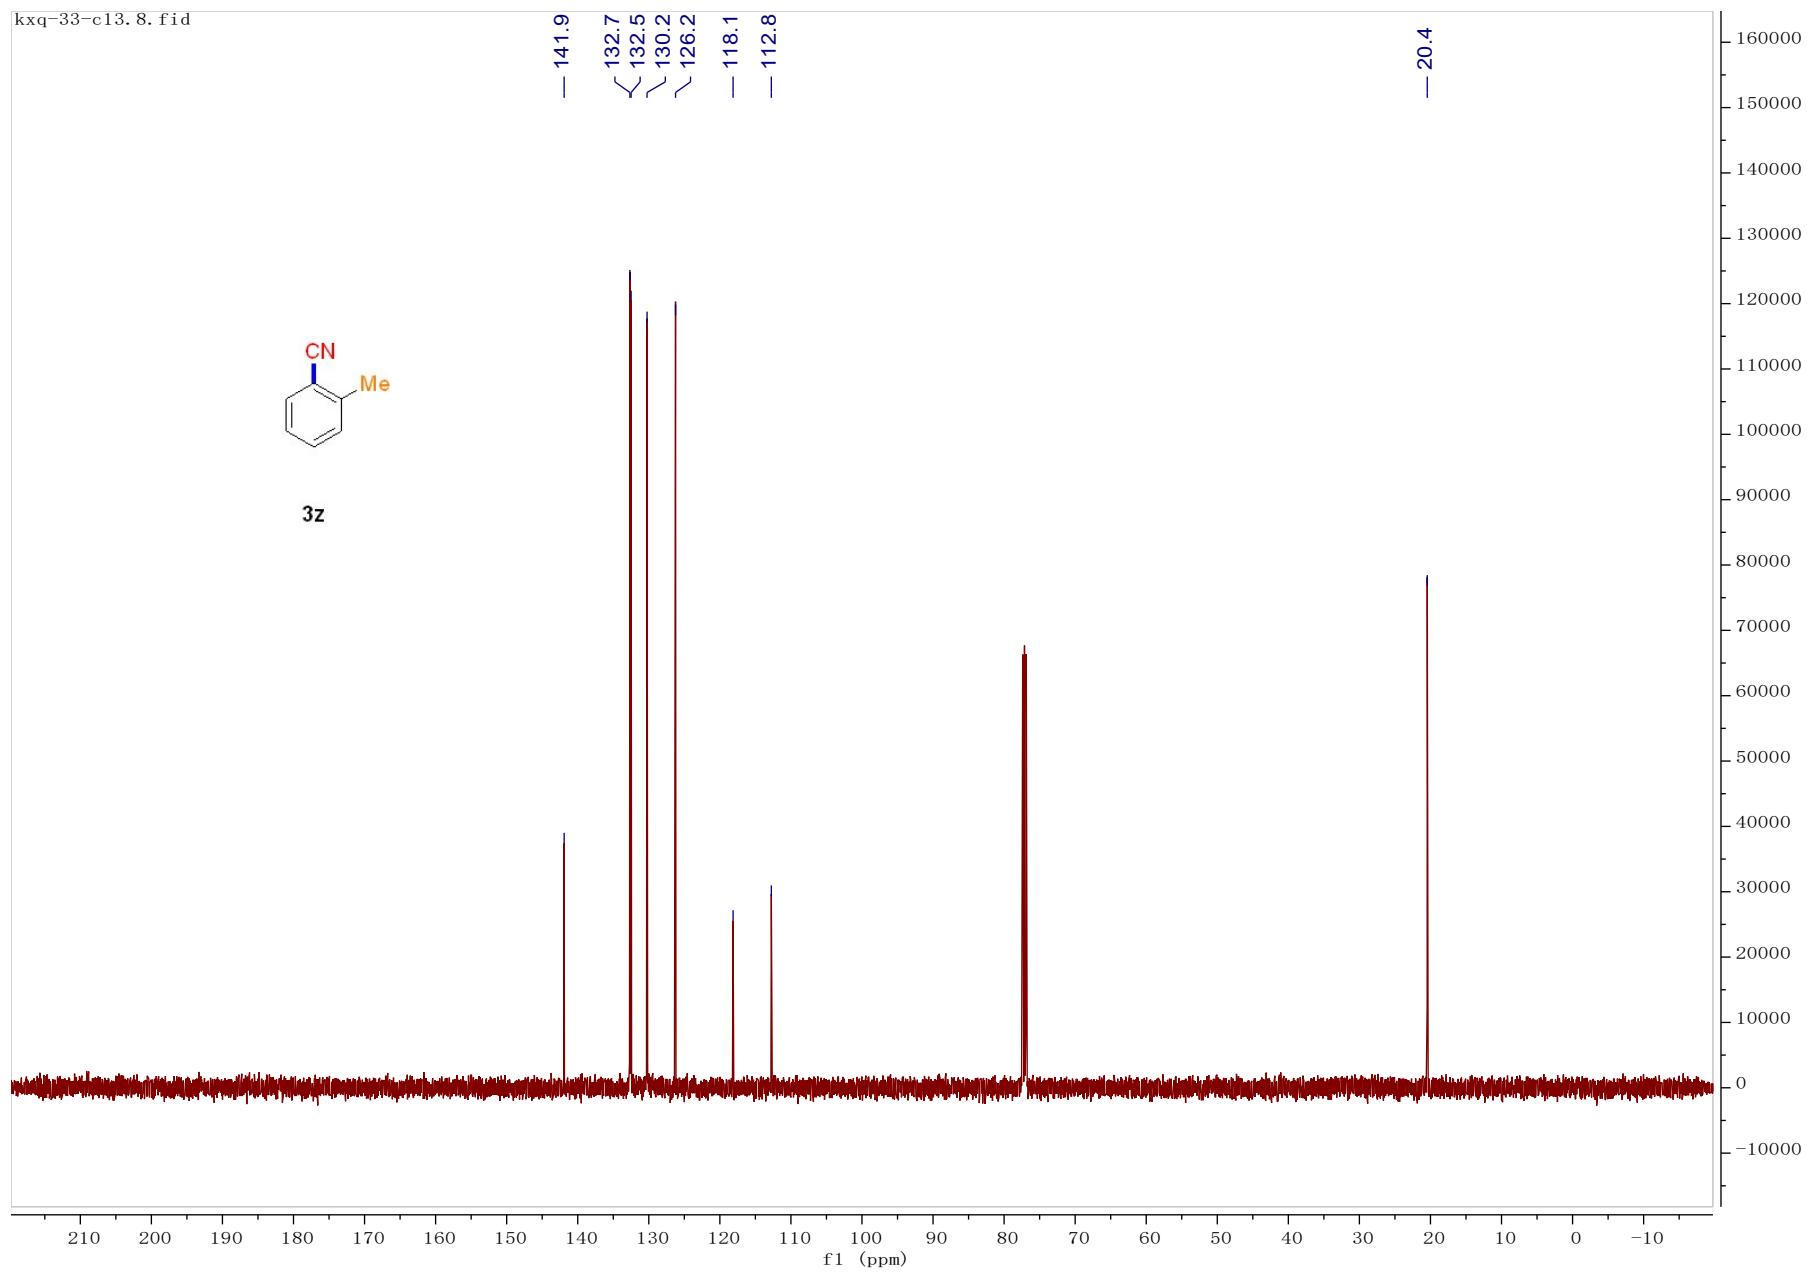

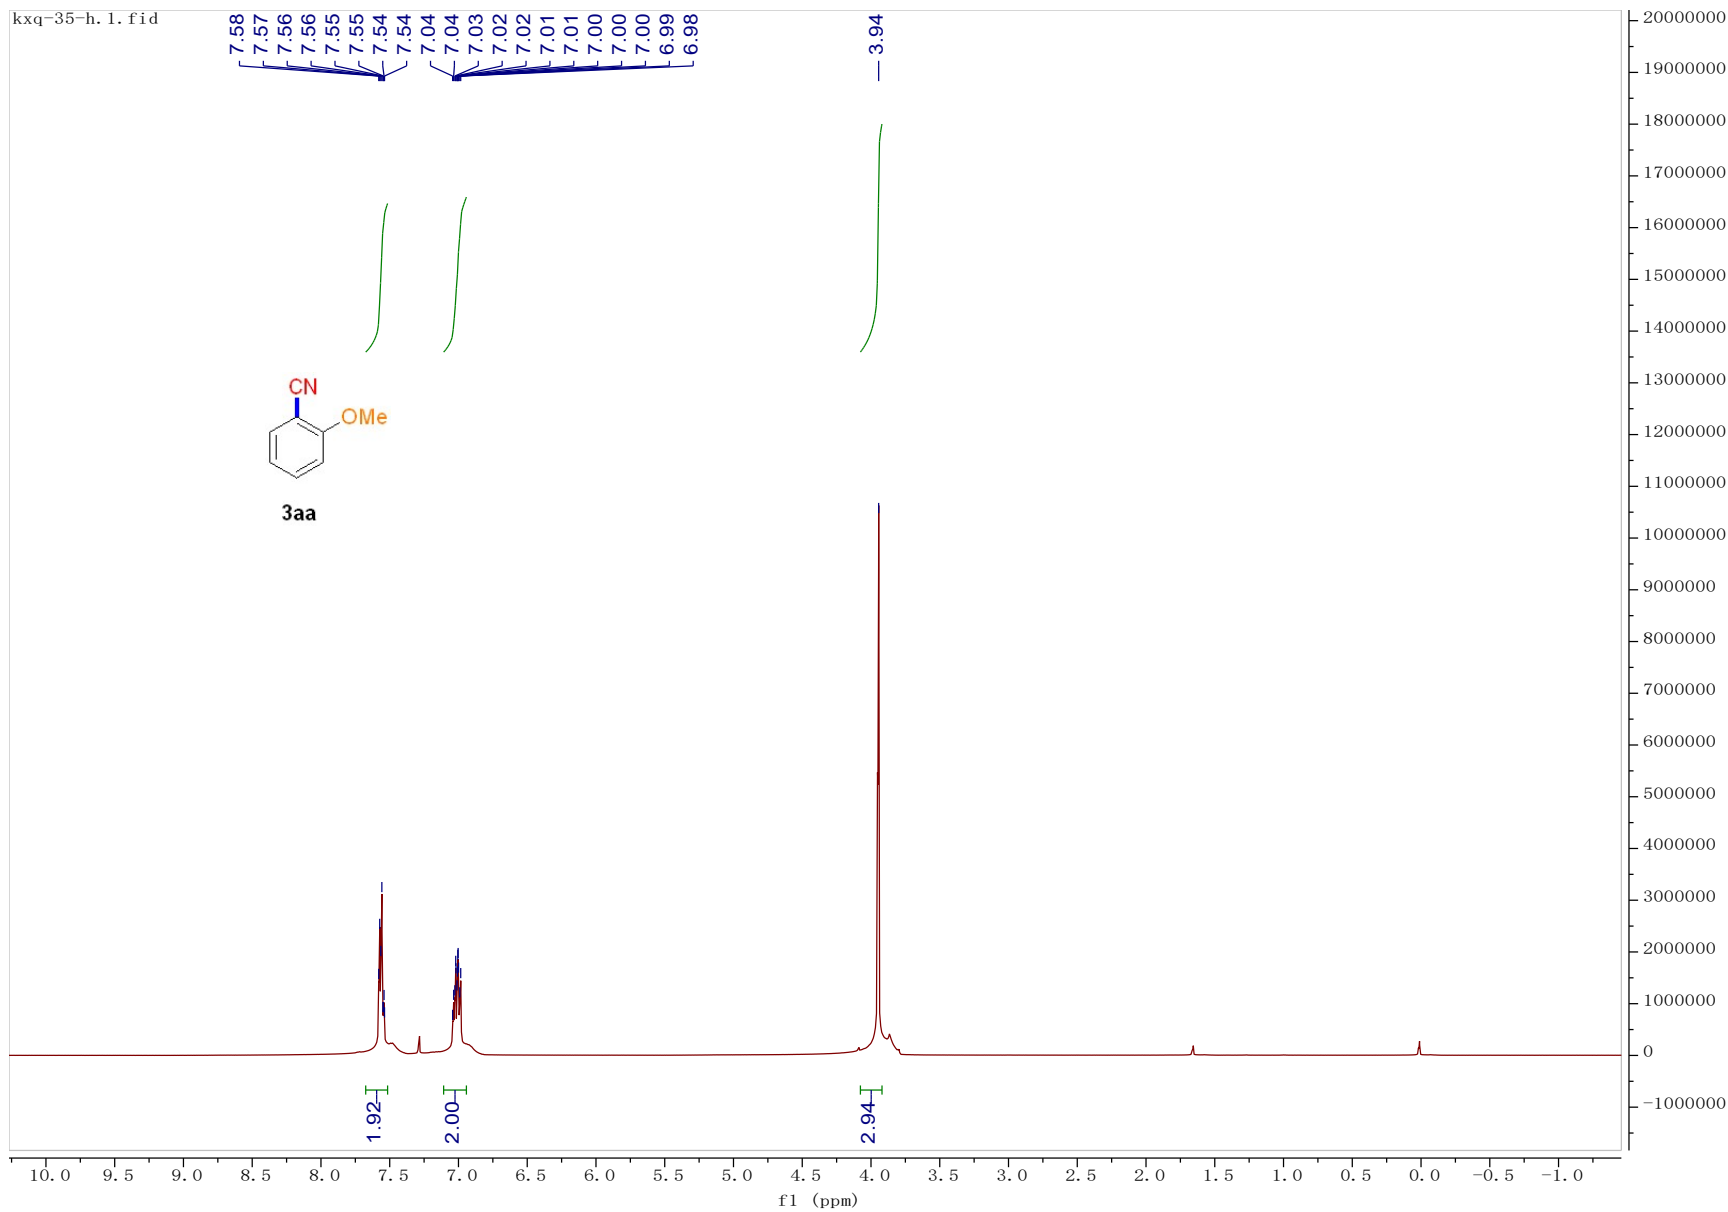

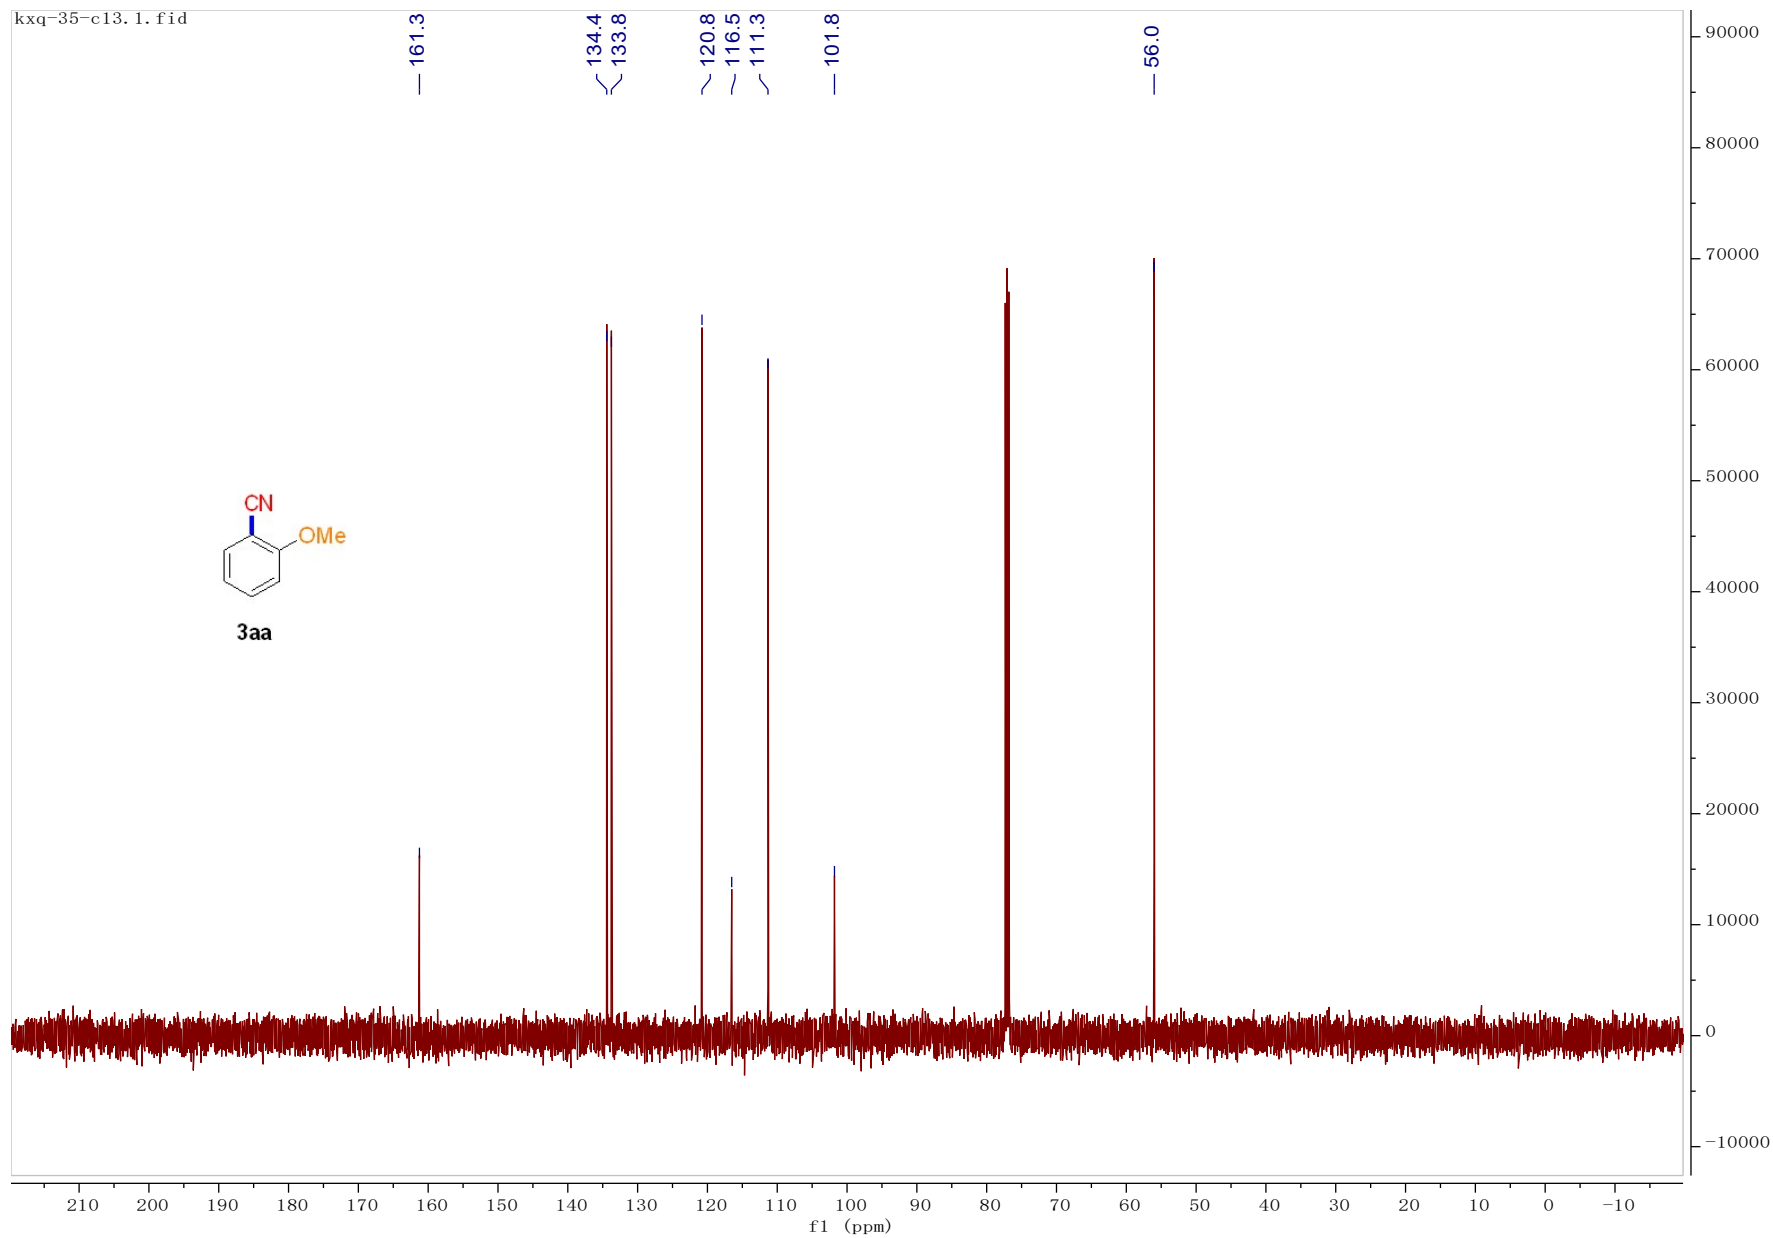



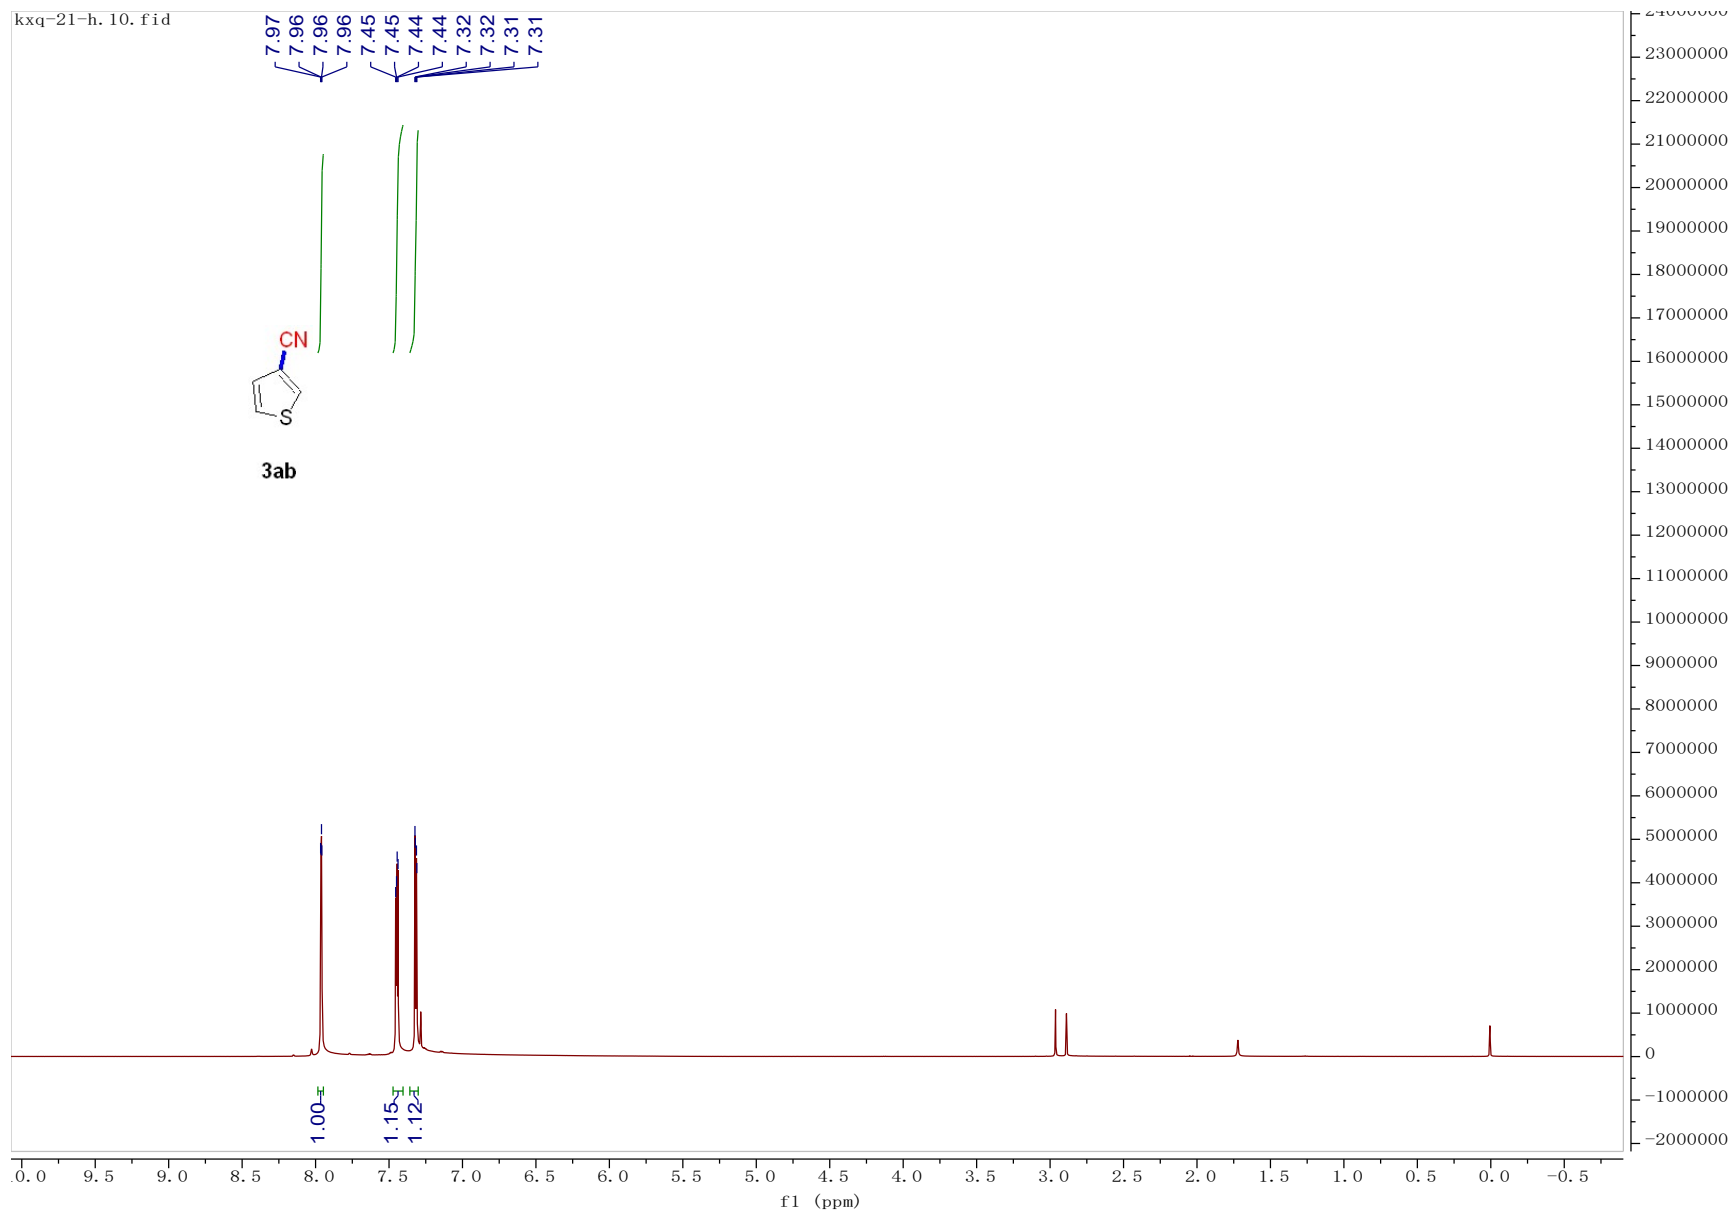

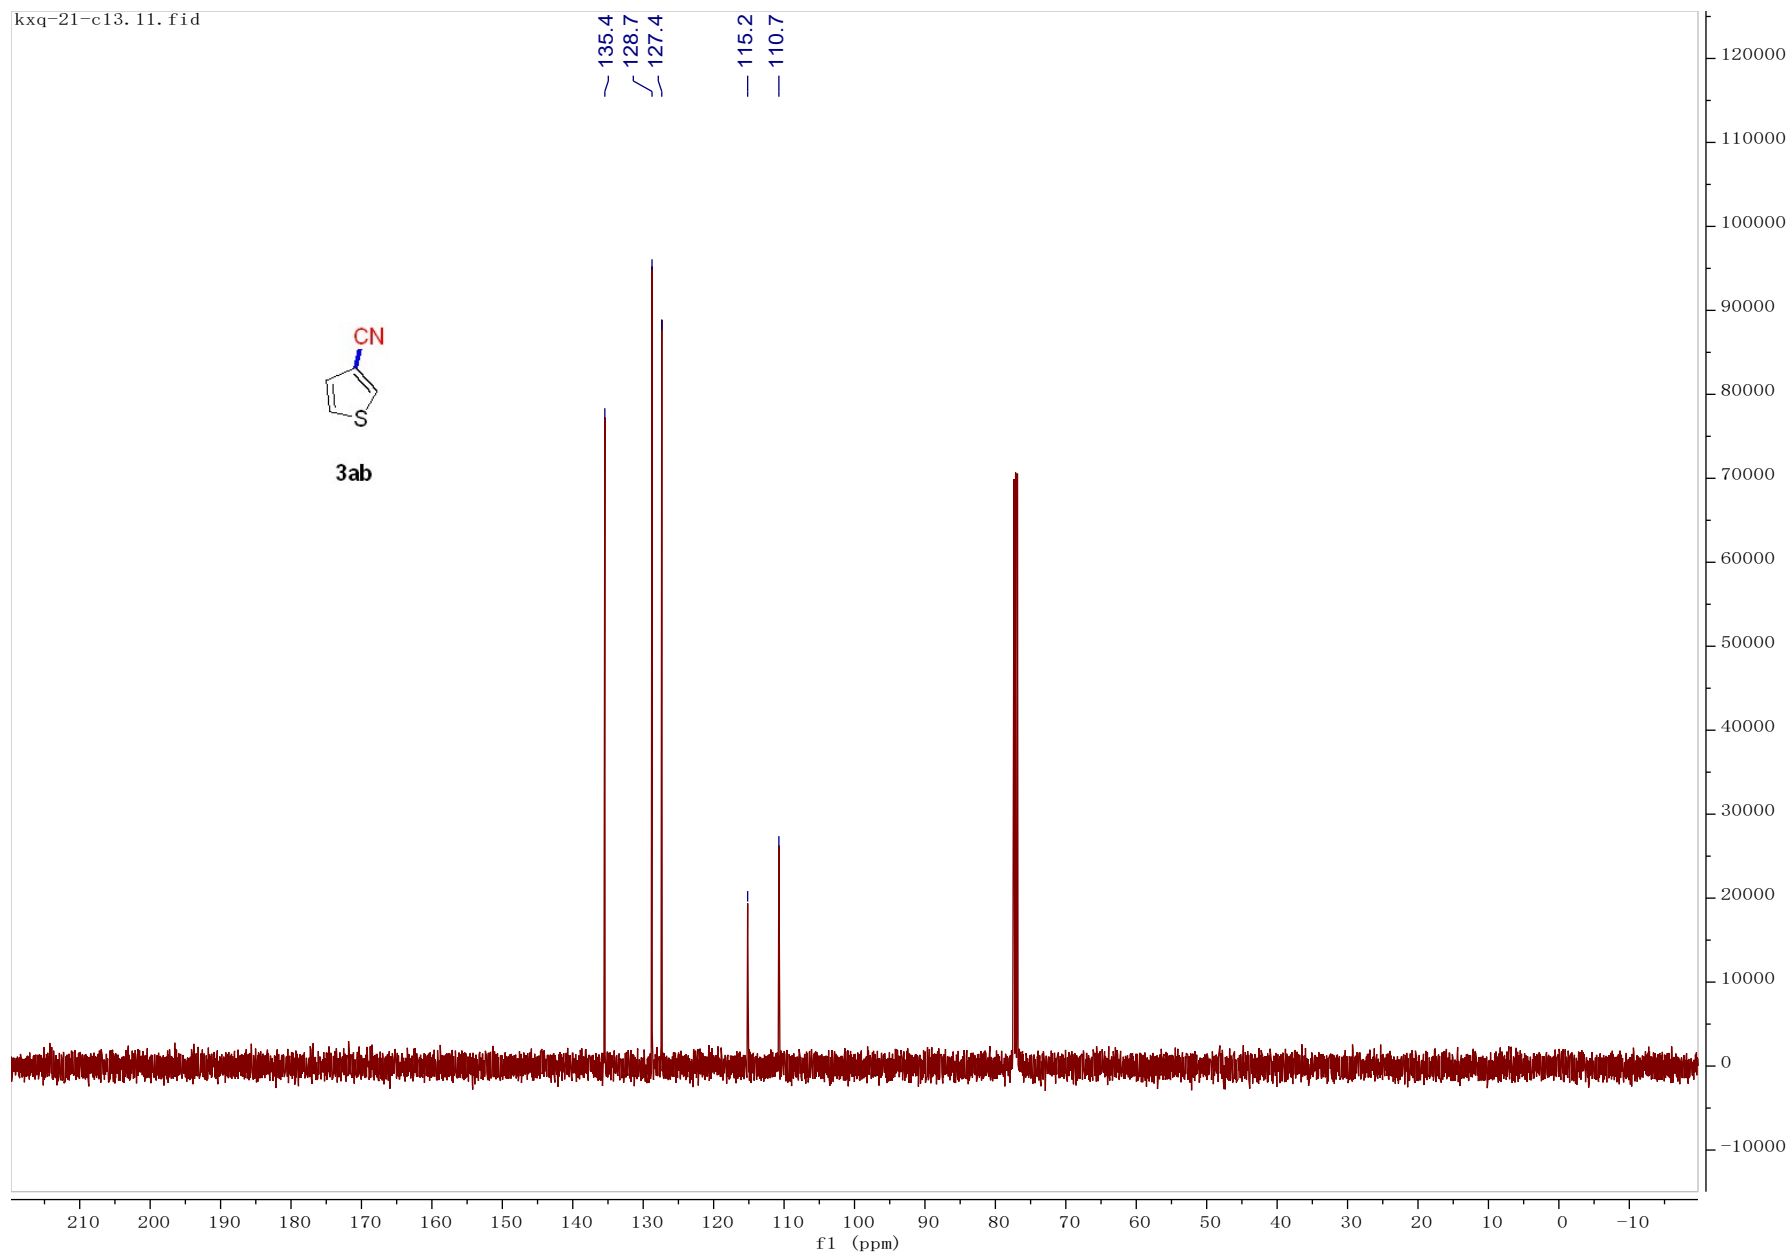

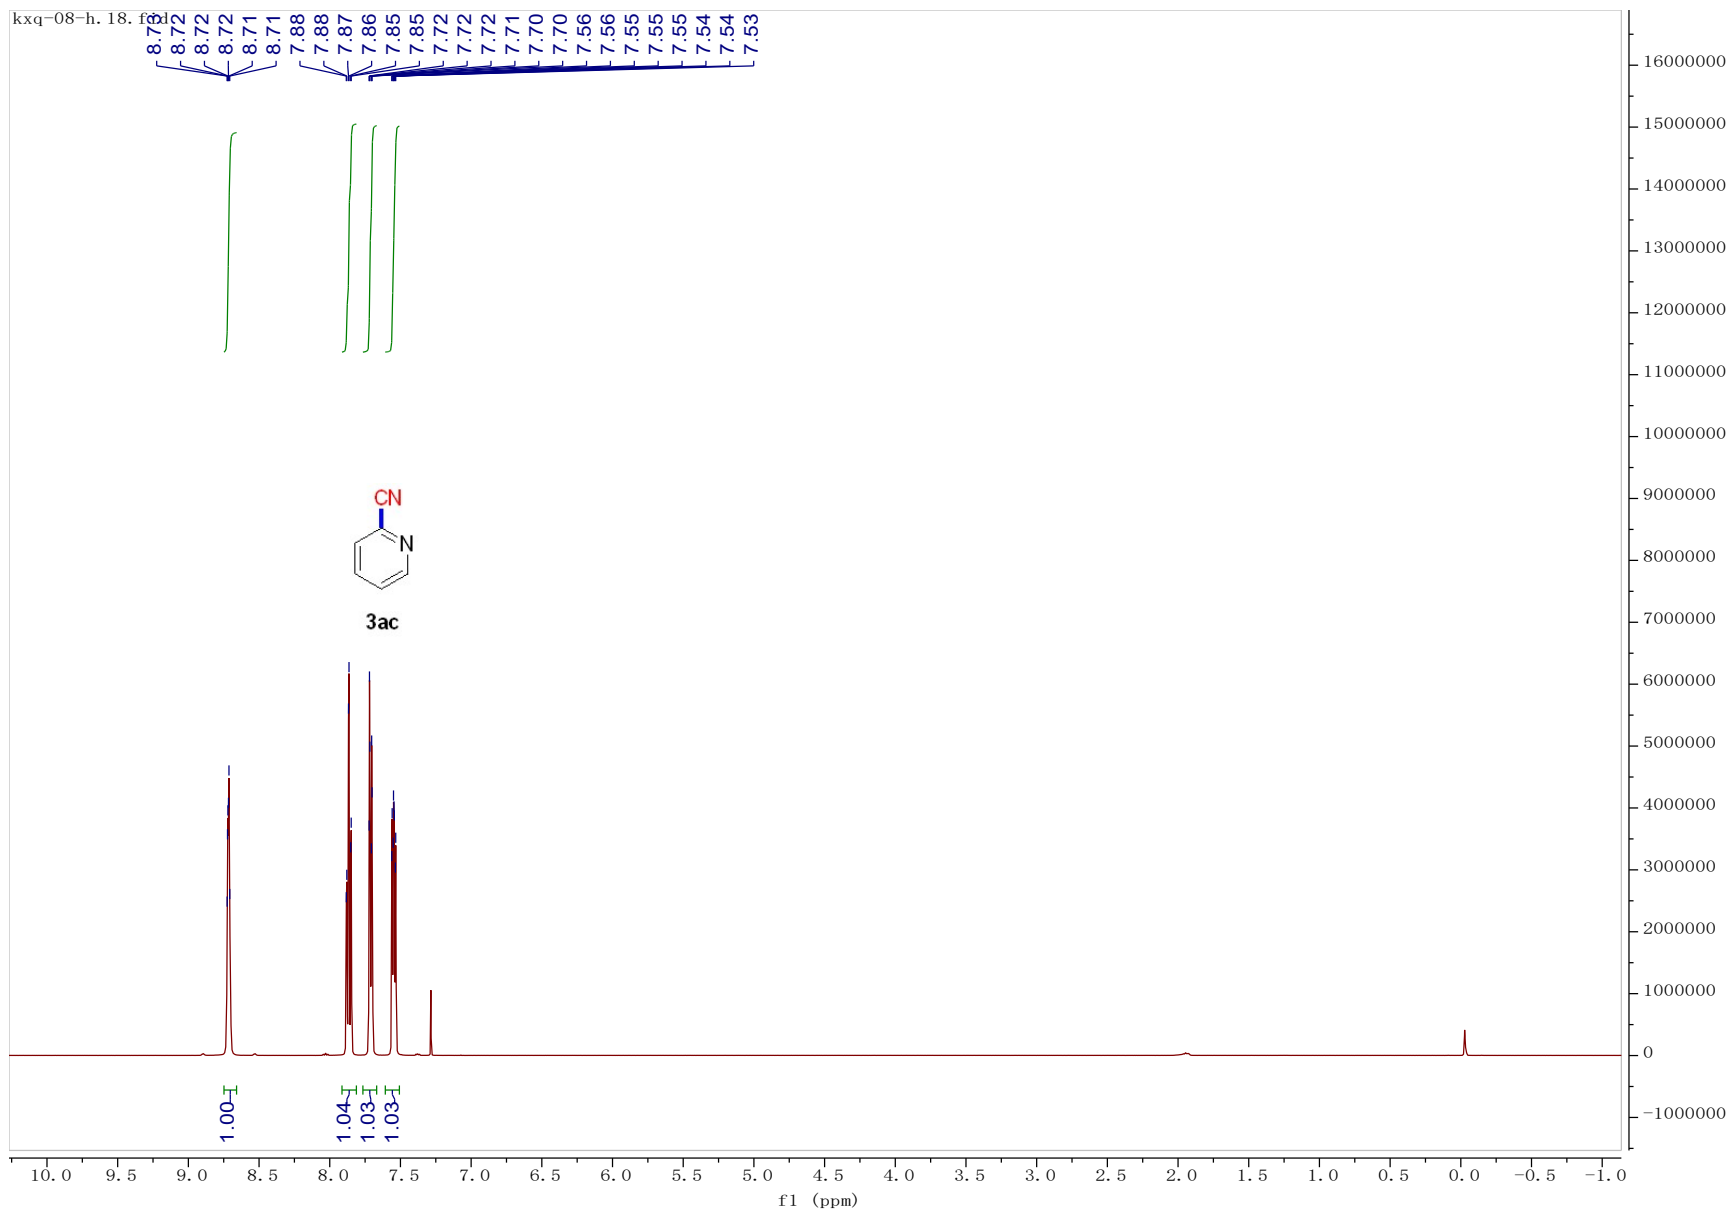

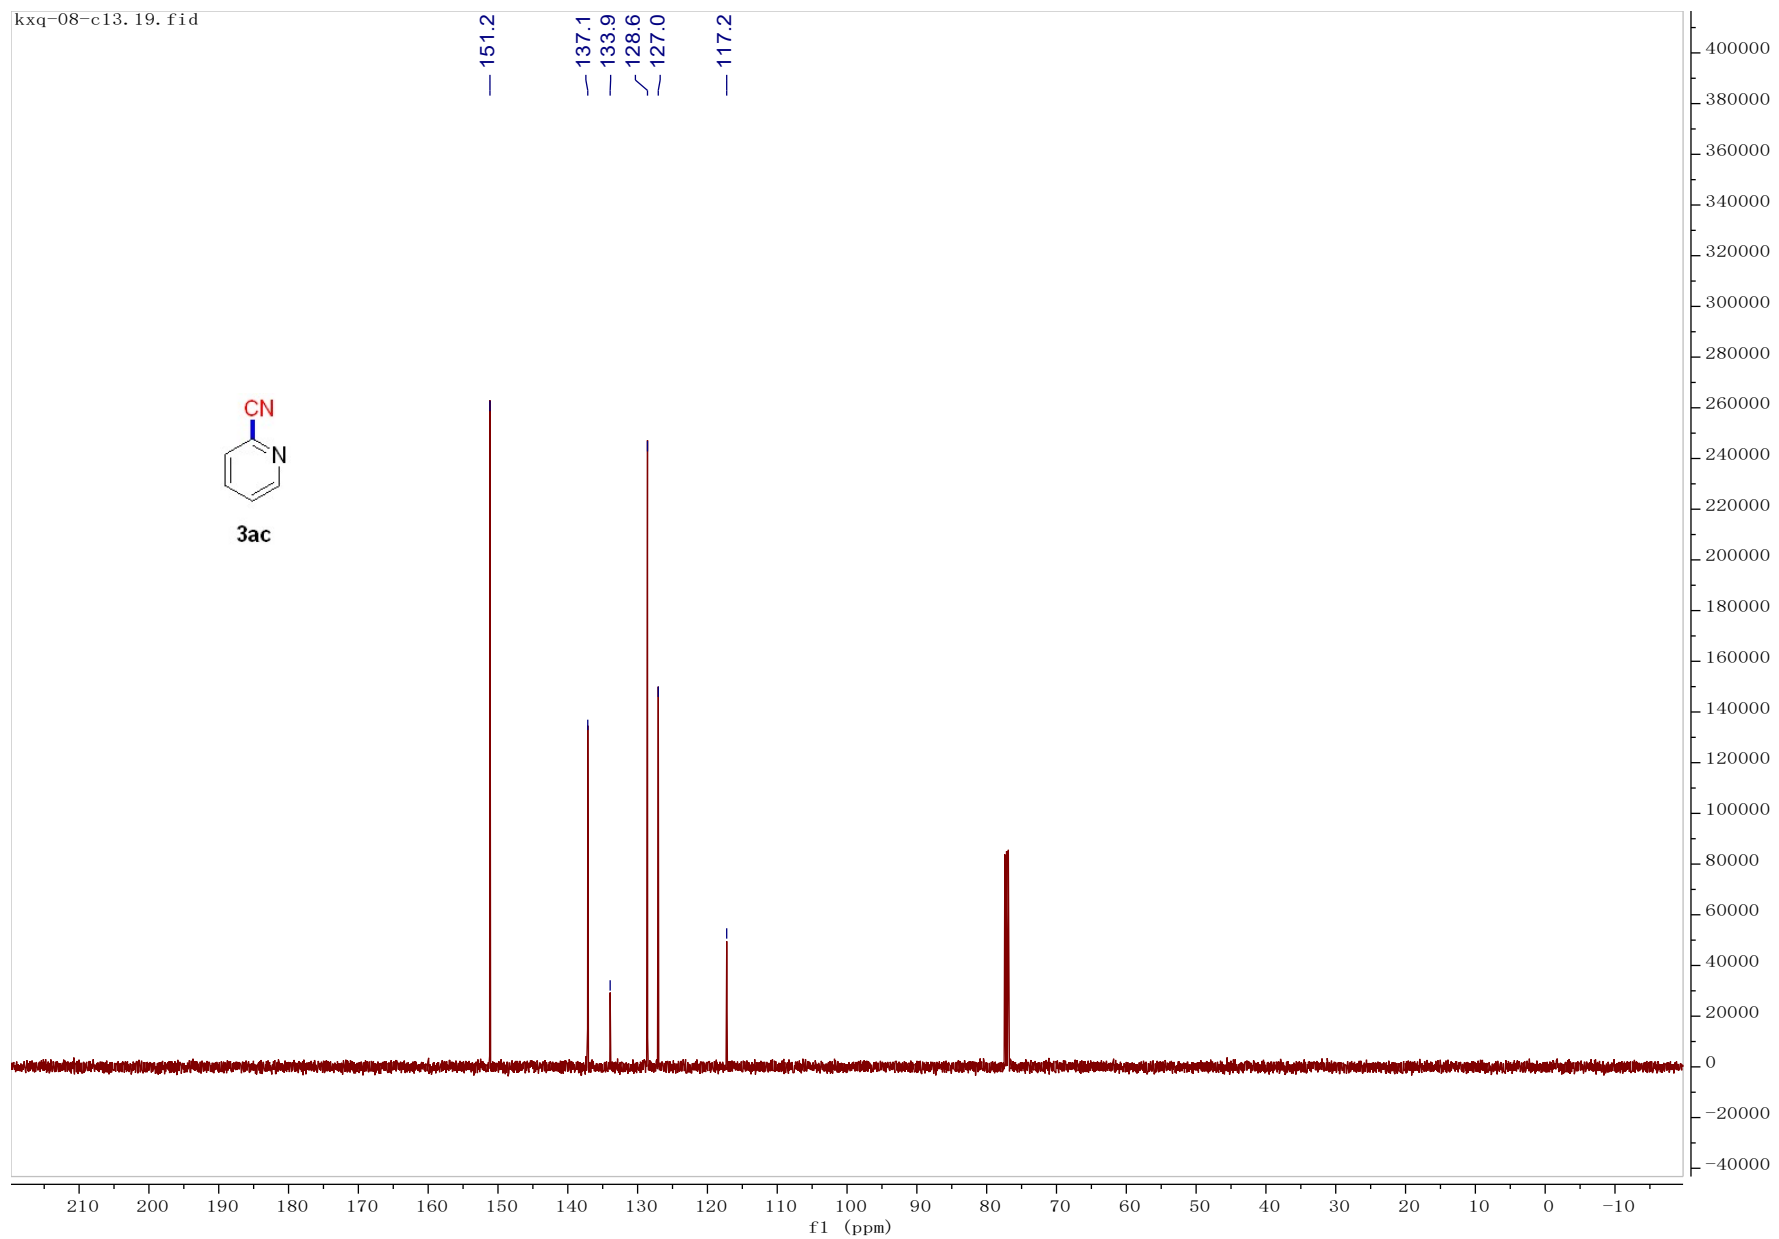

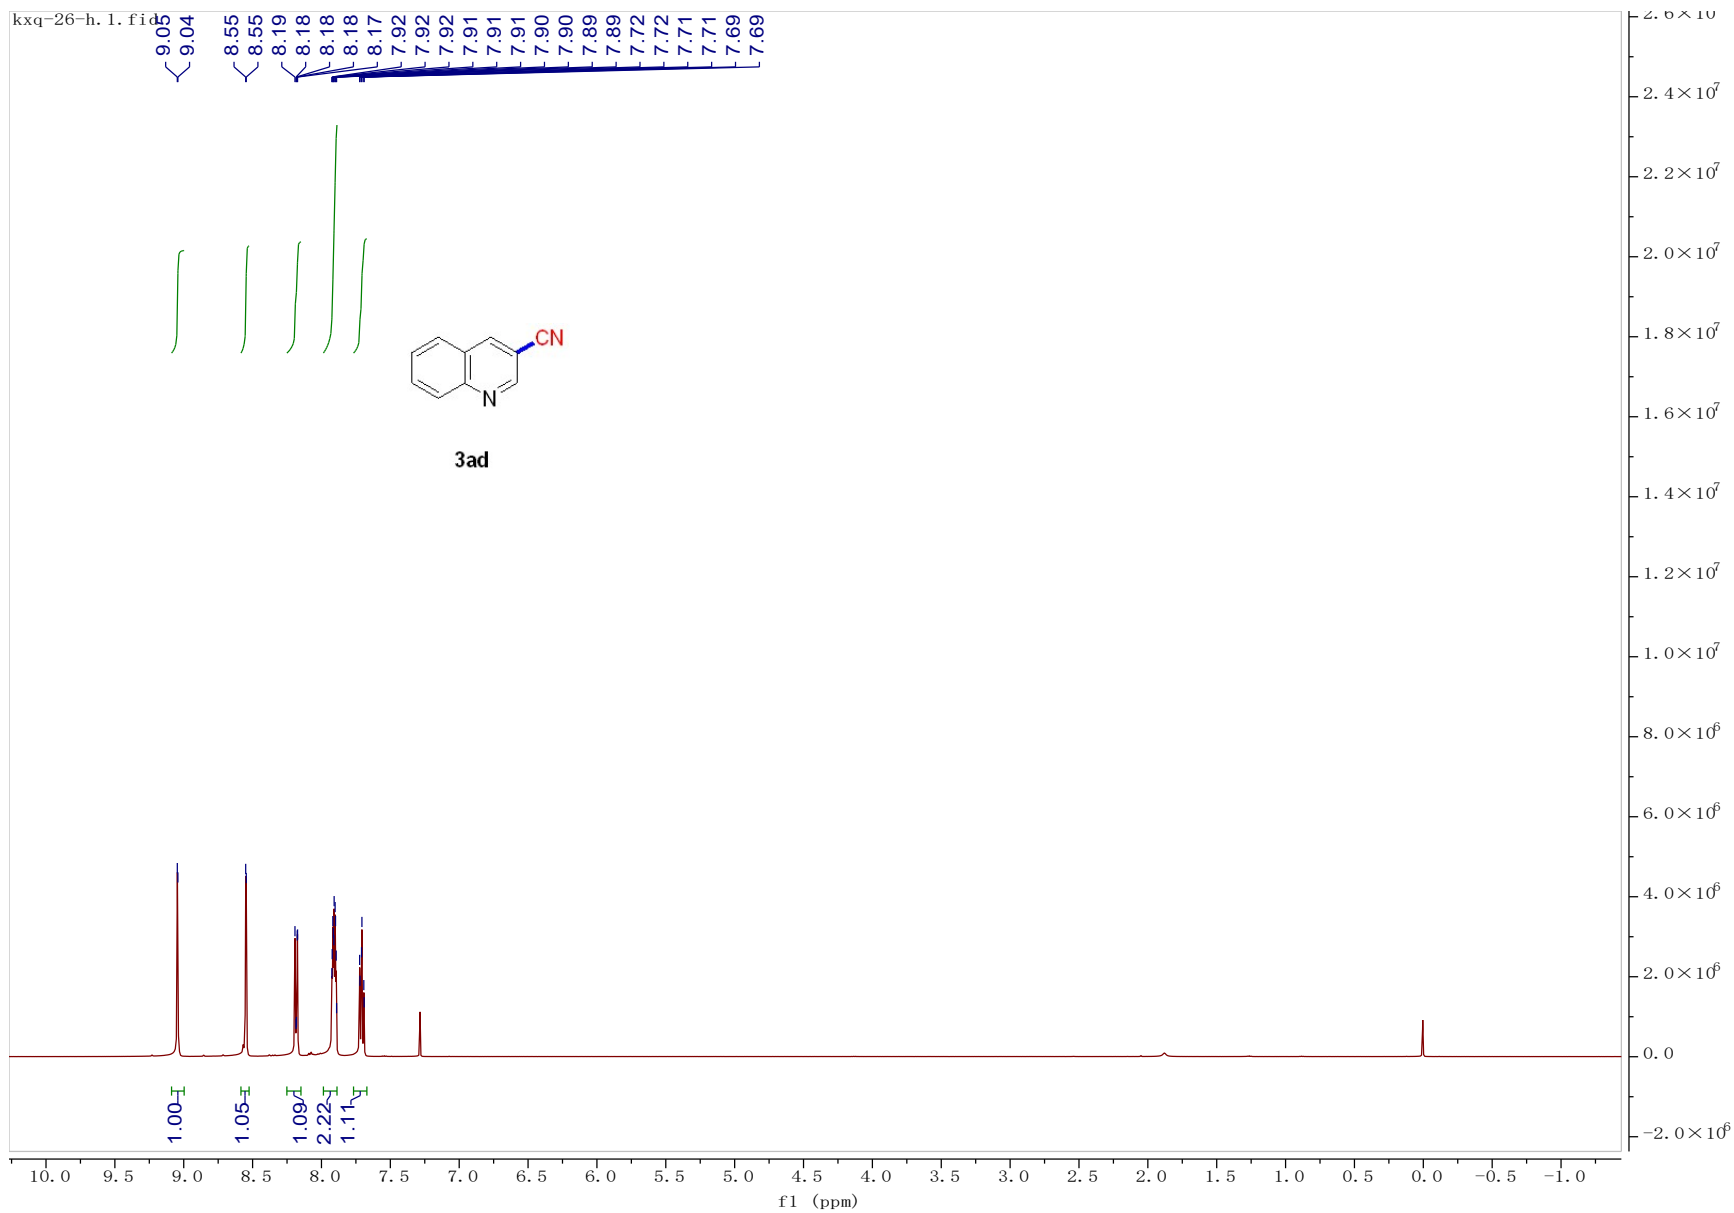

kxq-26-c13. 2. fid

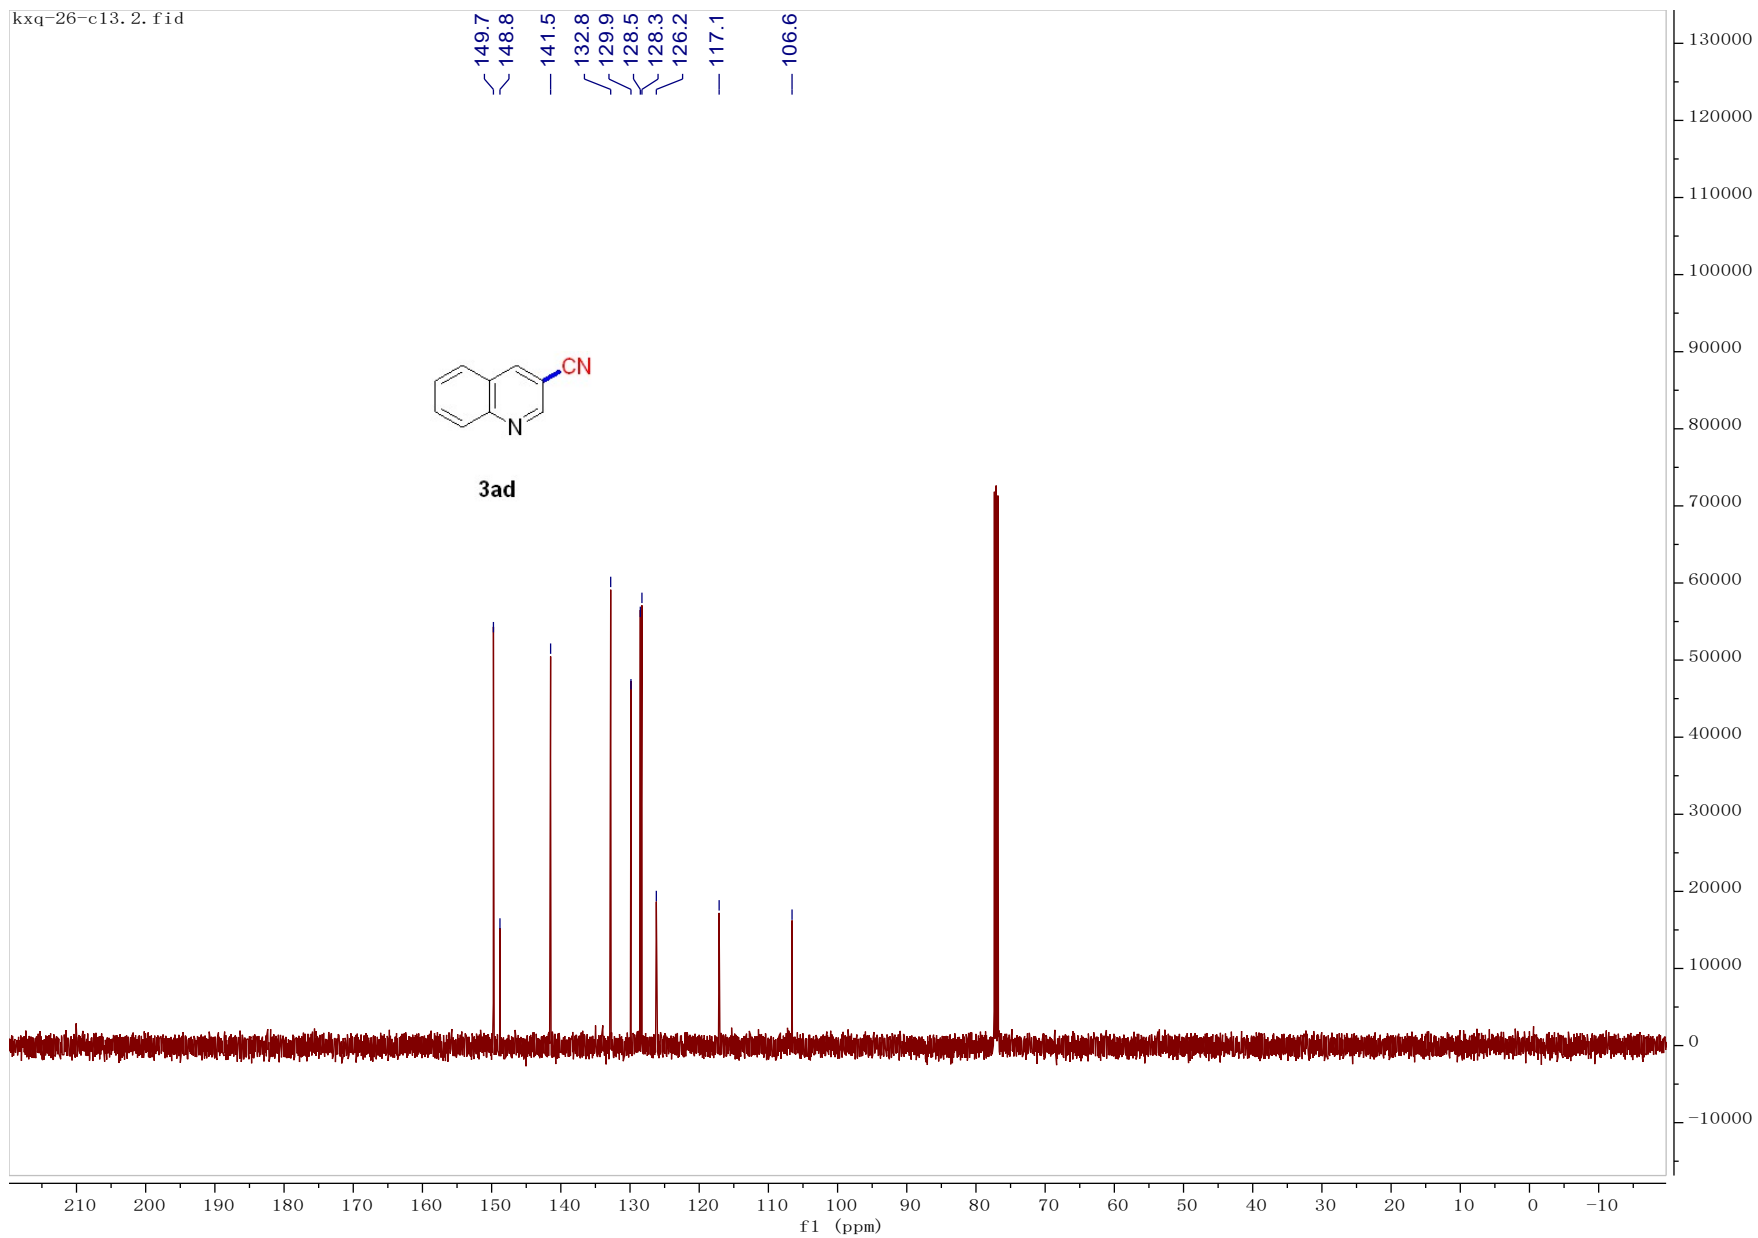

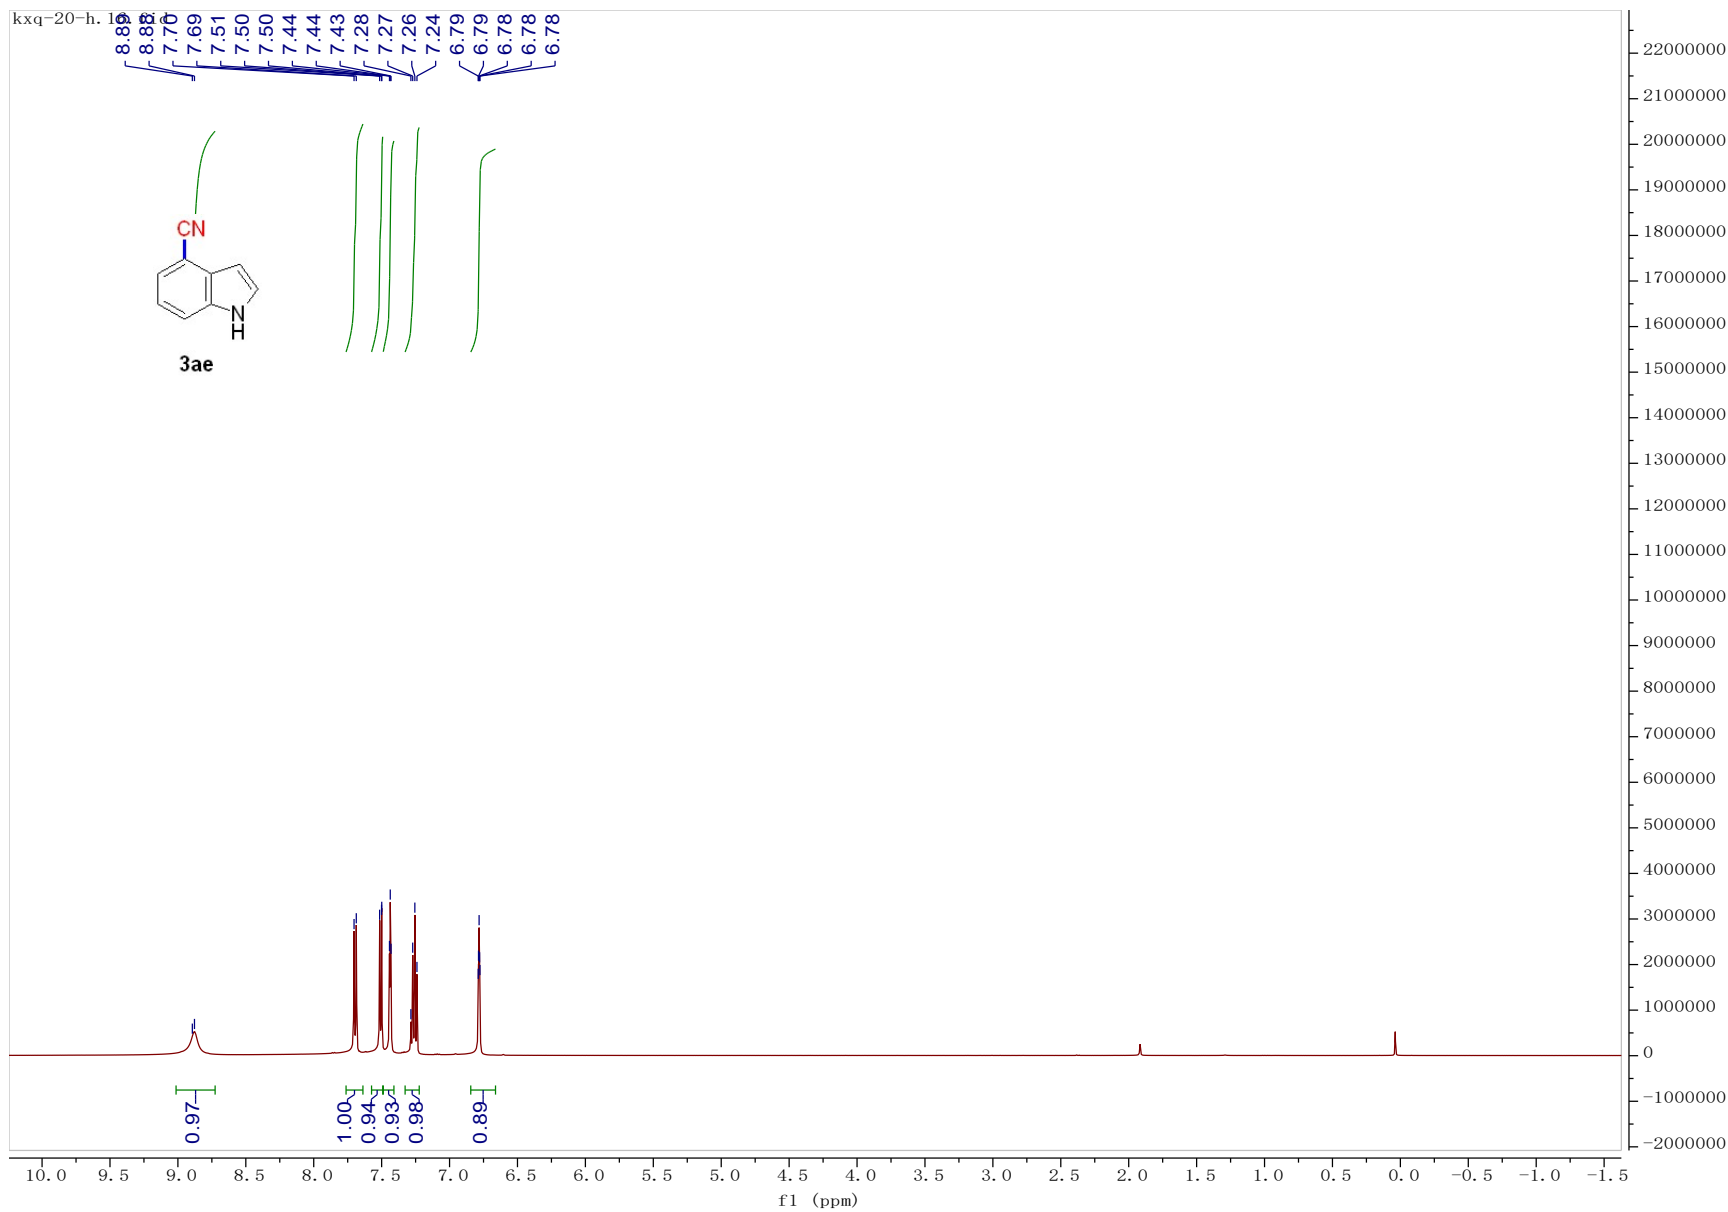

kxq-20-c13.17.fid

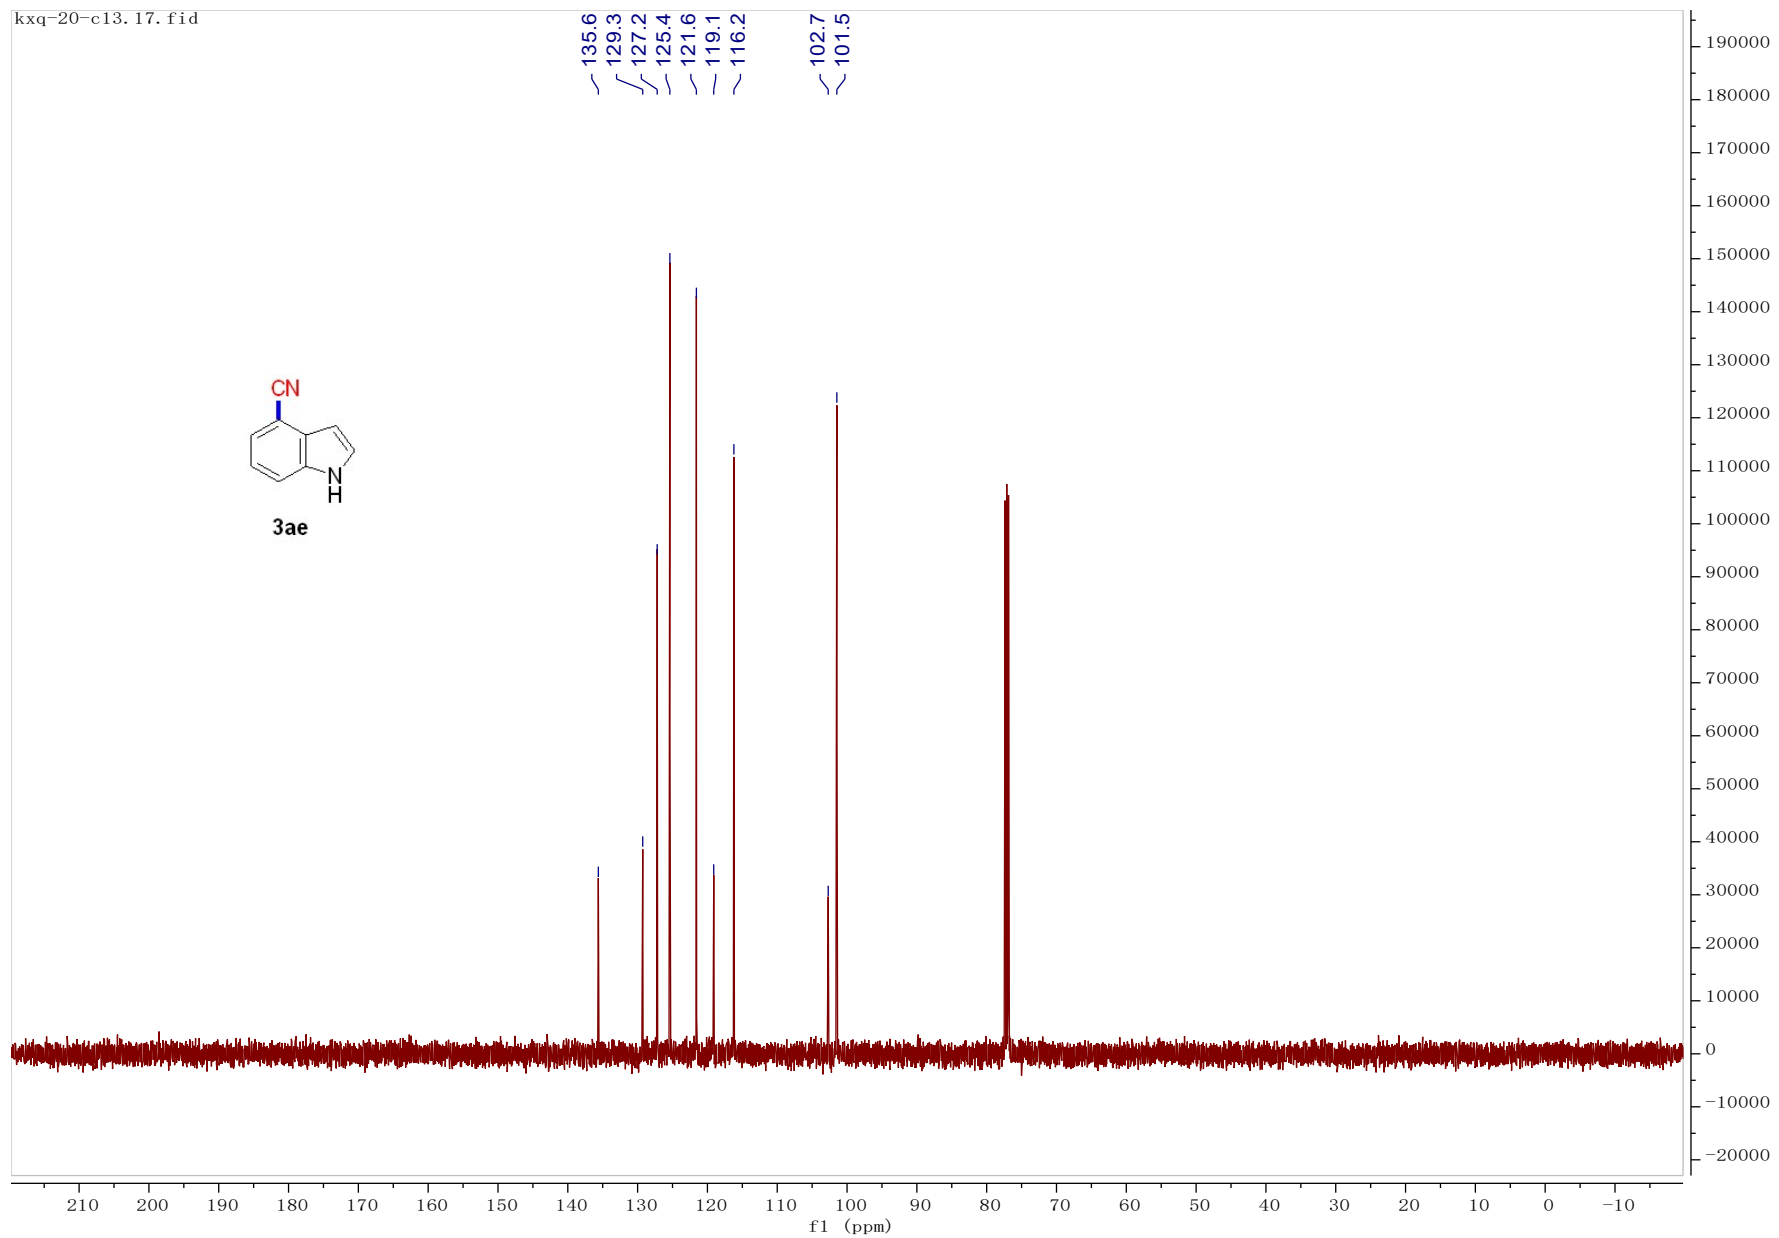



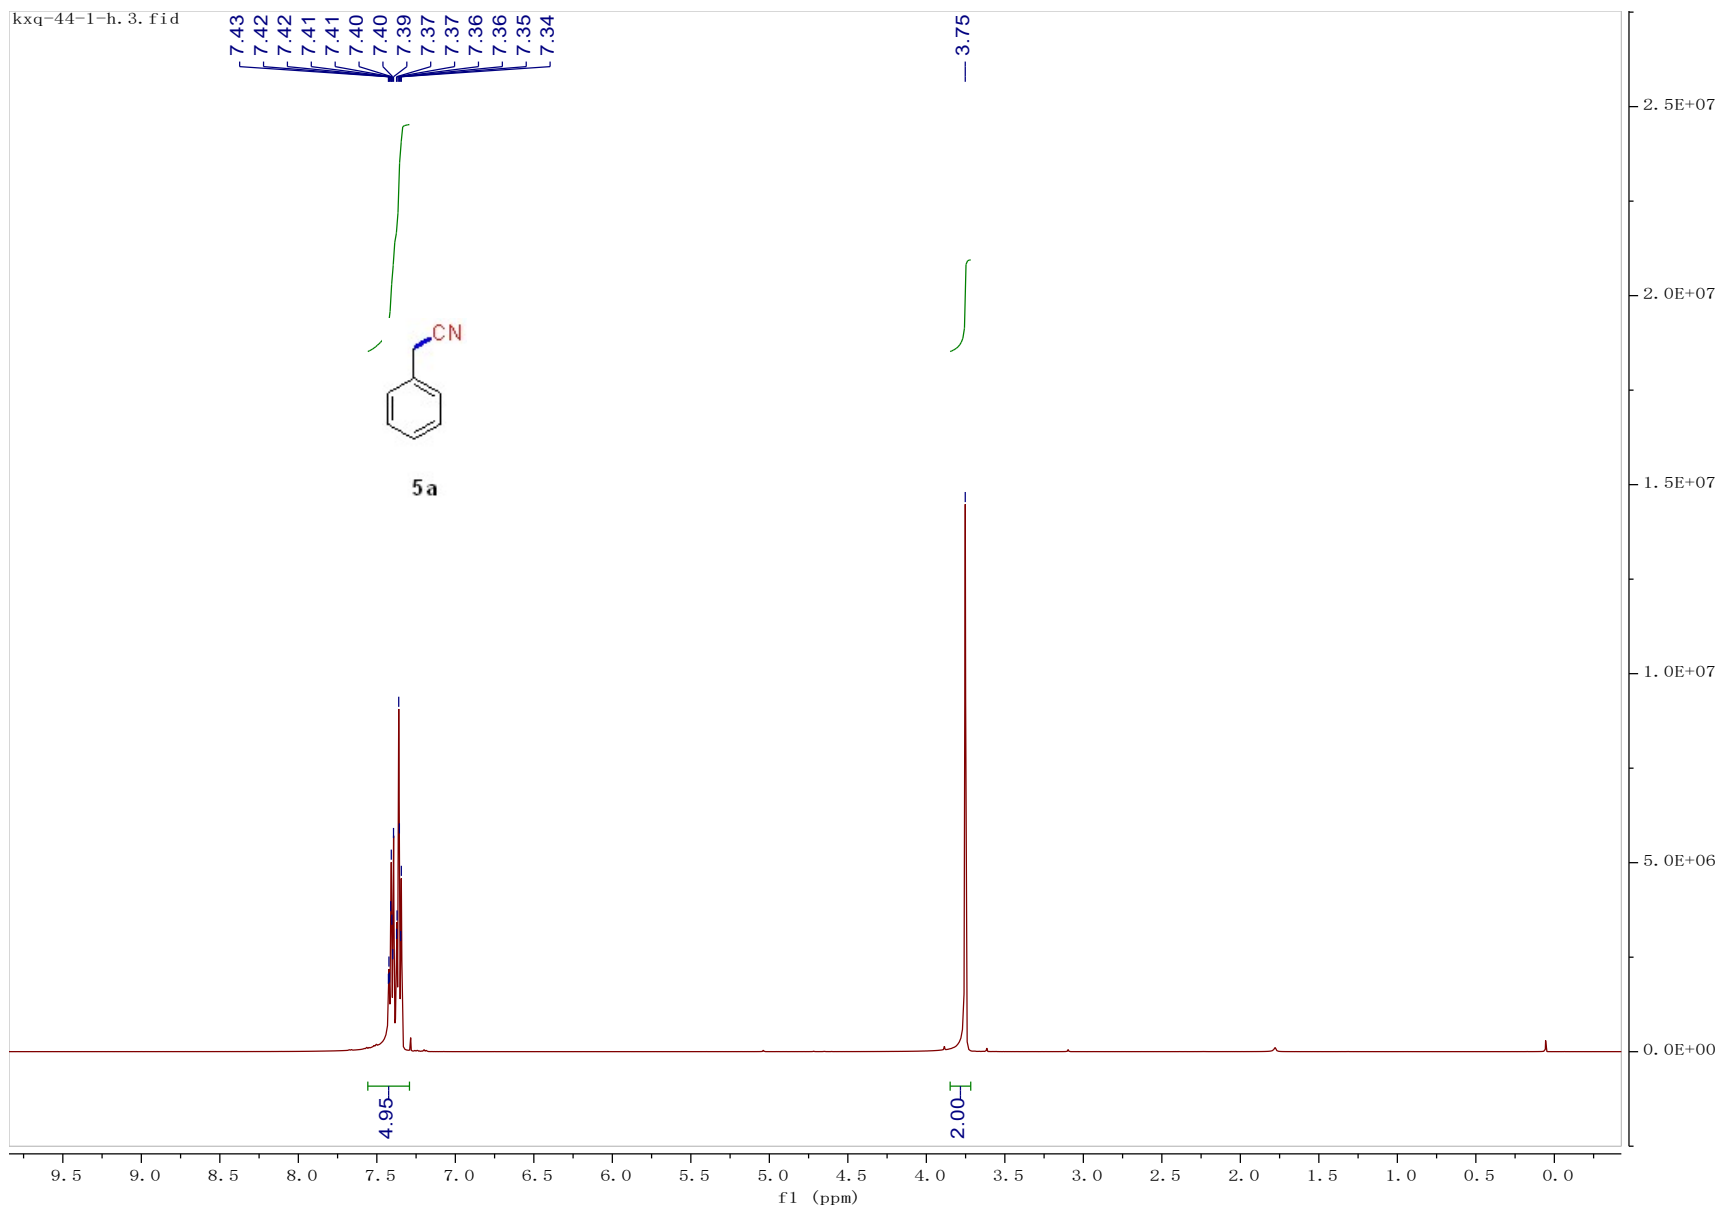

kxq-44-1-c13. 4. fid

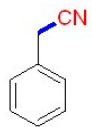

5a

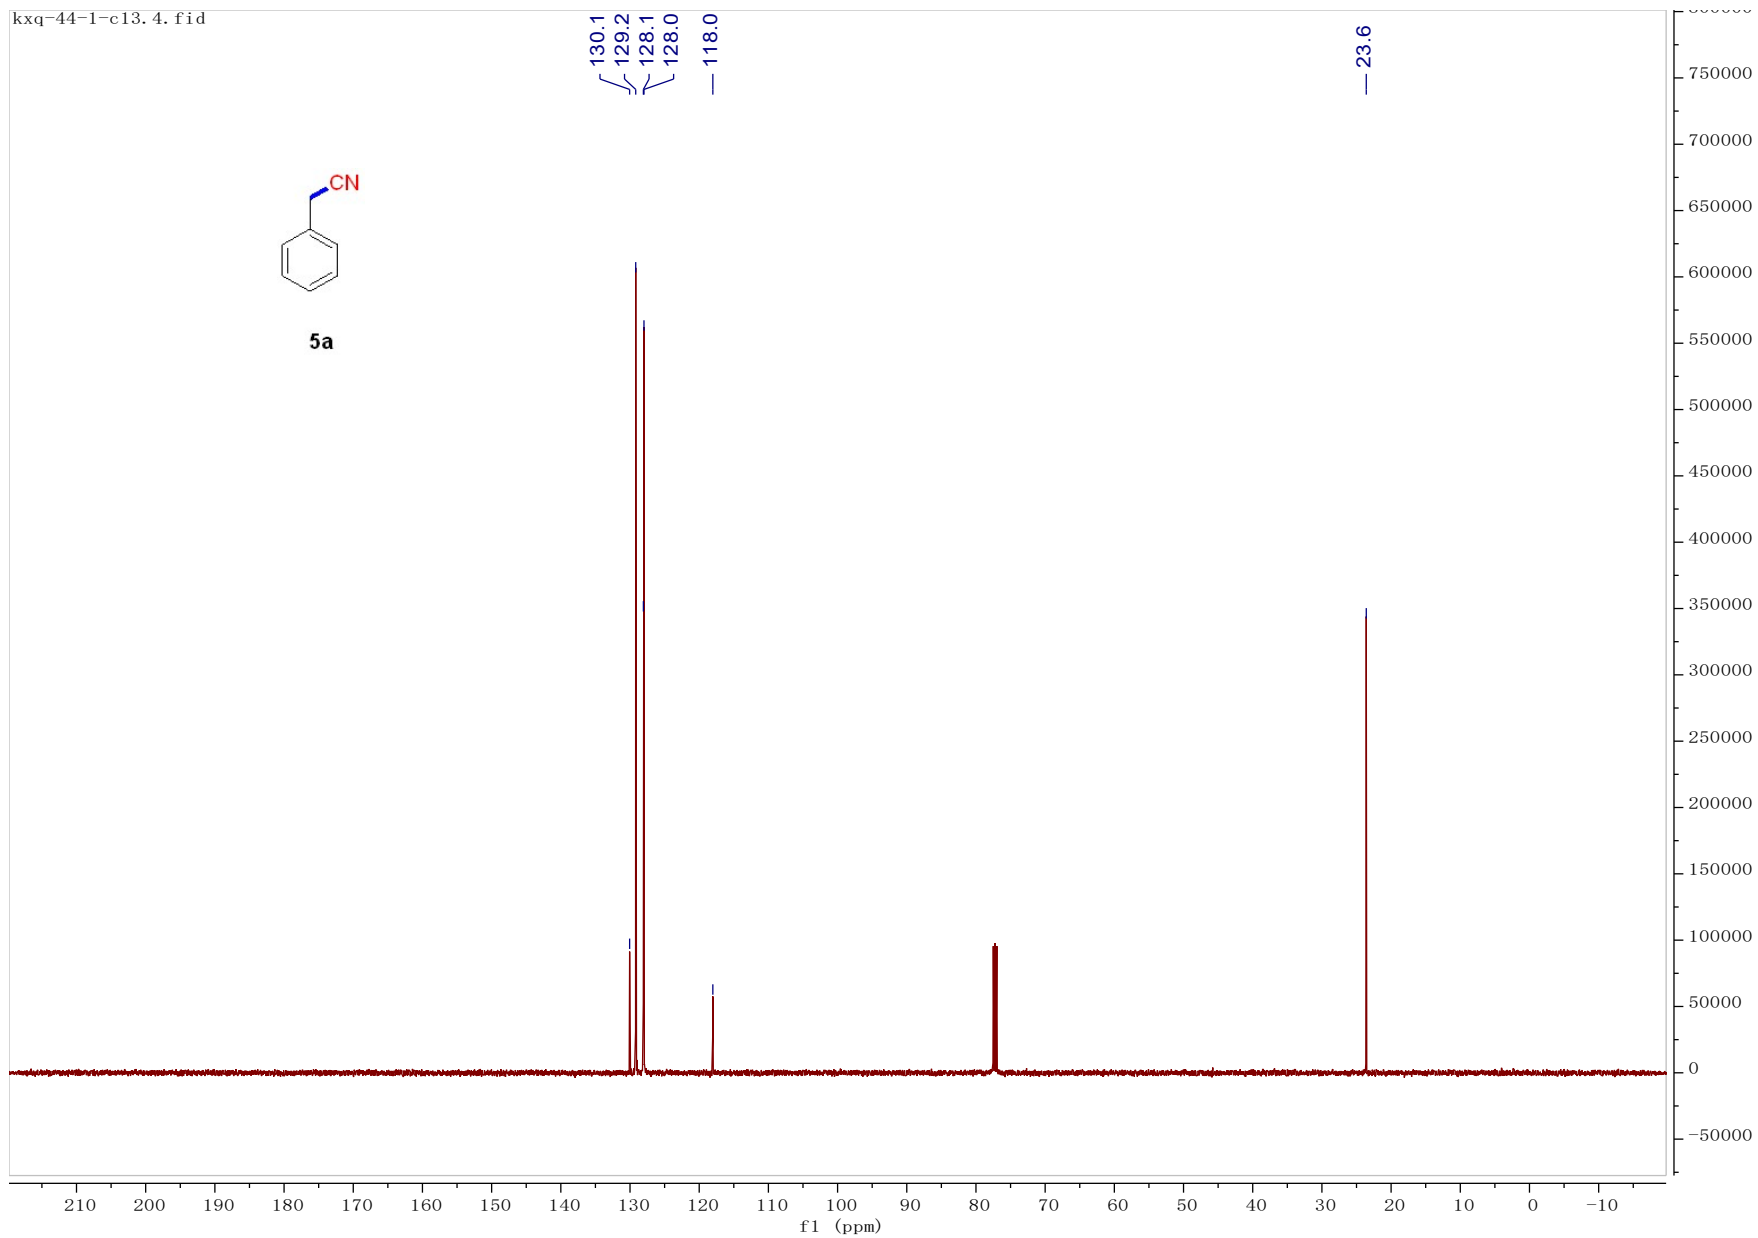

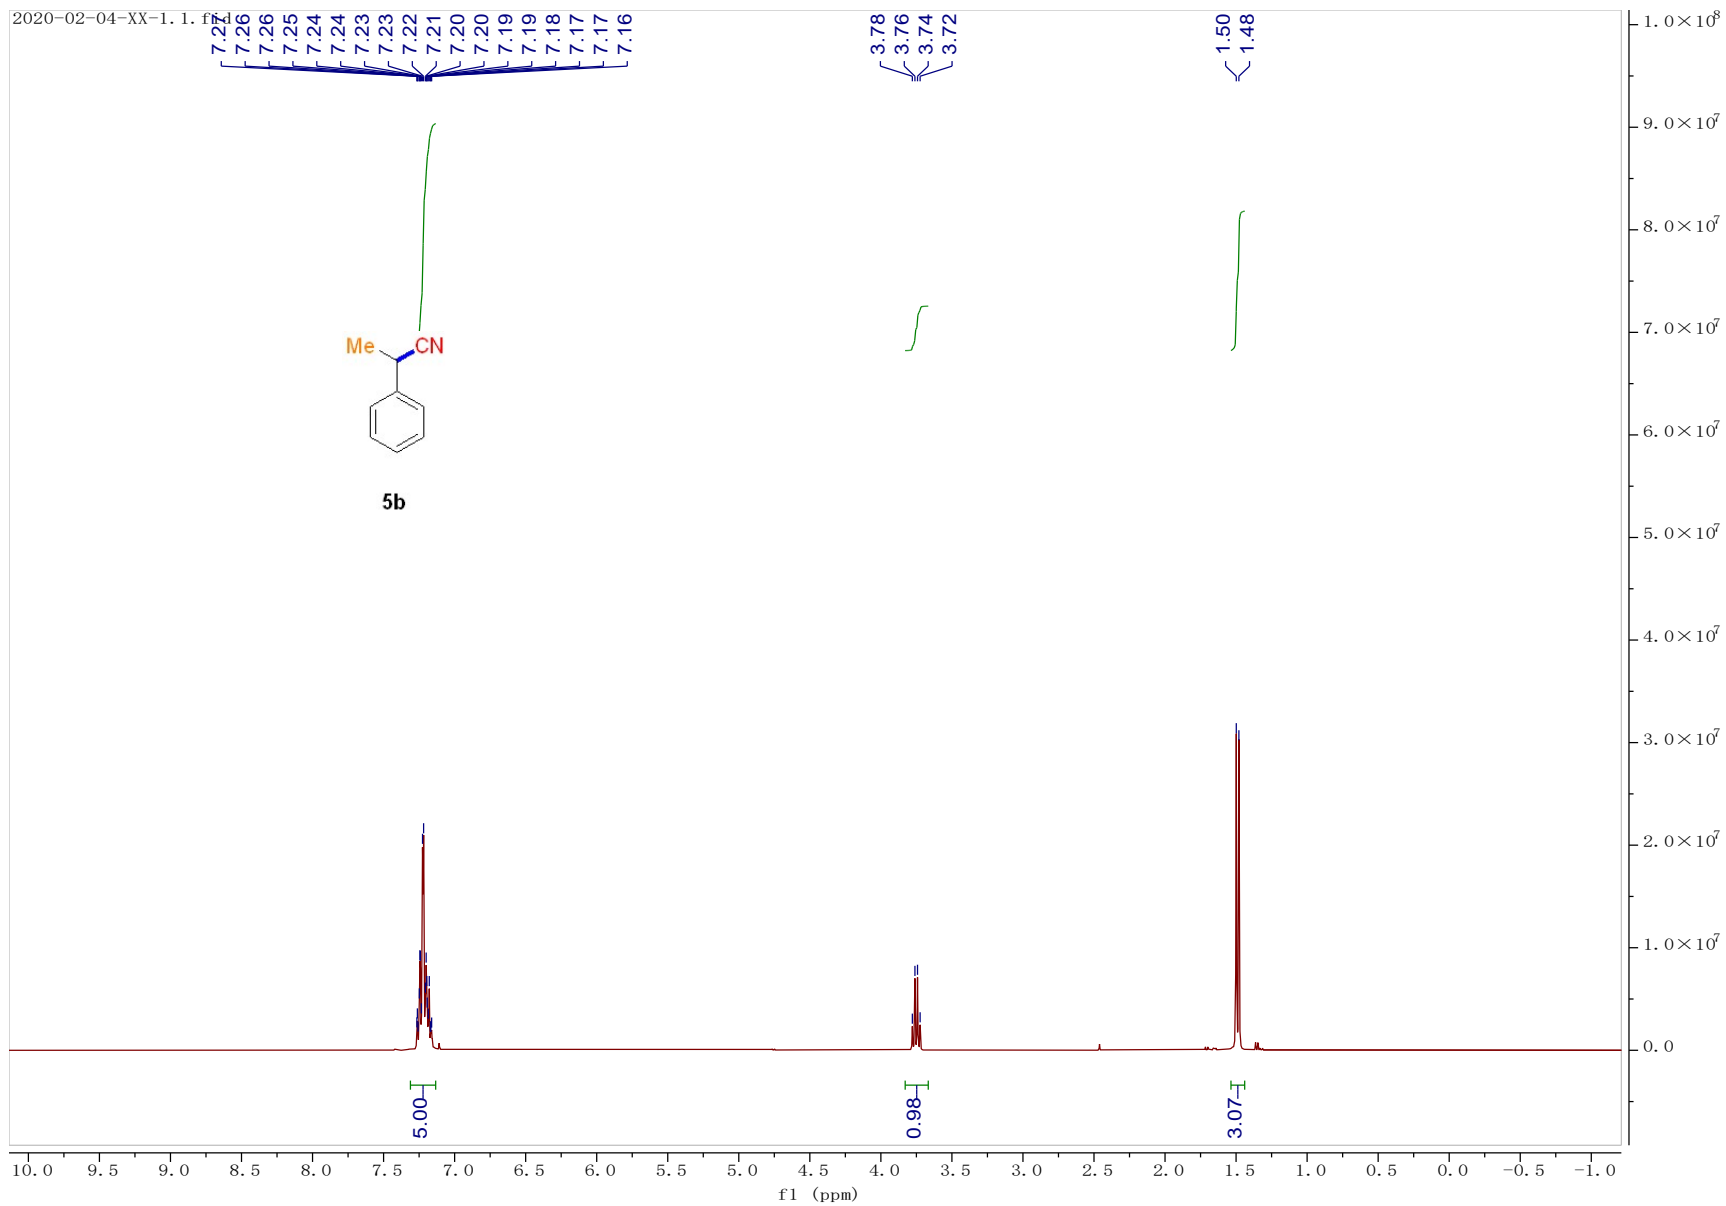

2020-02-04-XX-1.2.fid

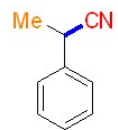

**5b**

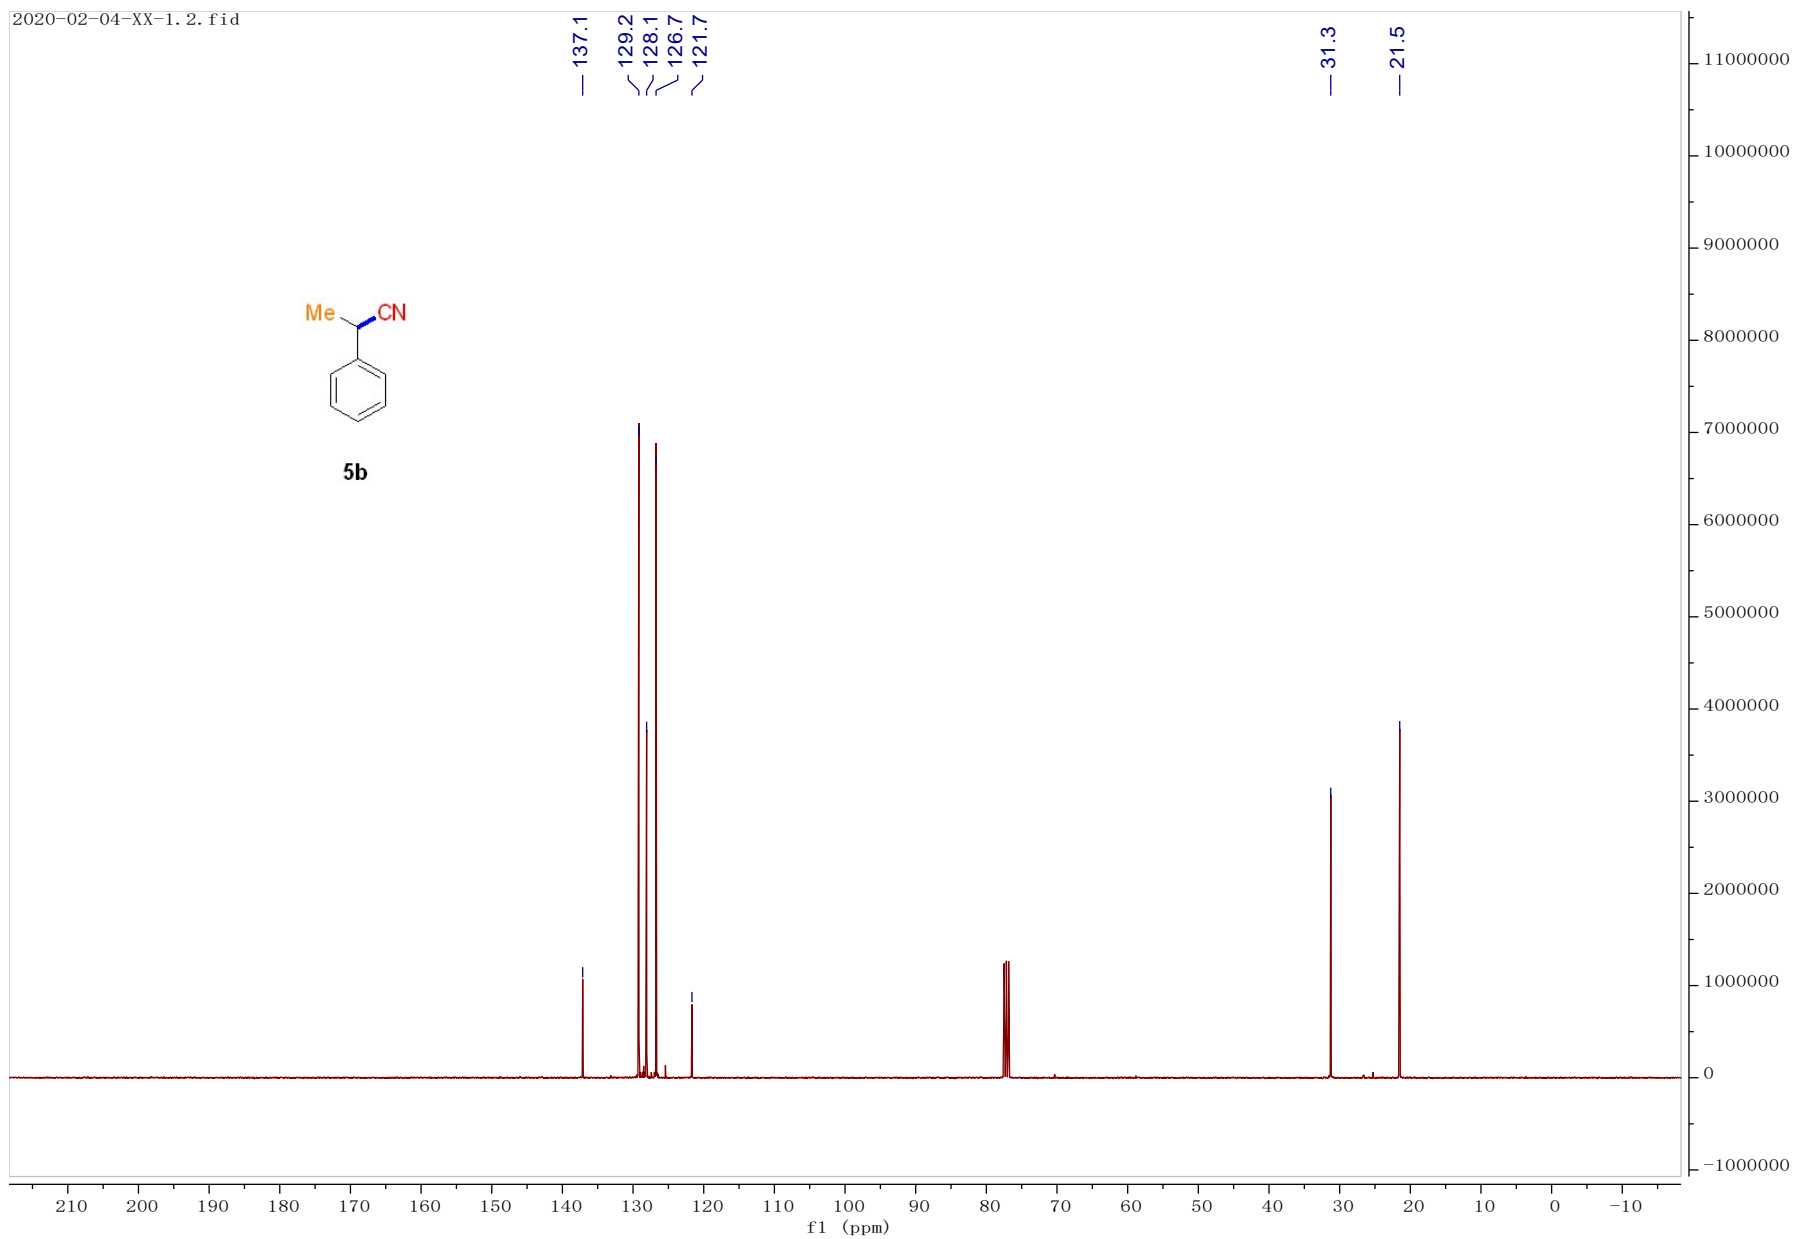

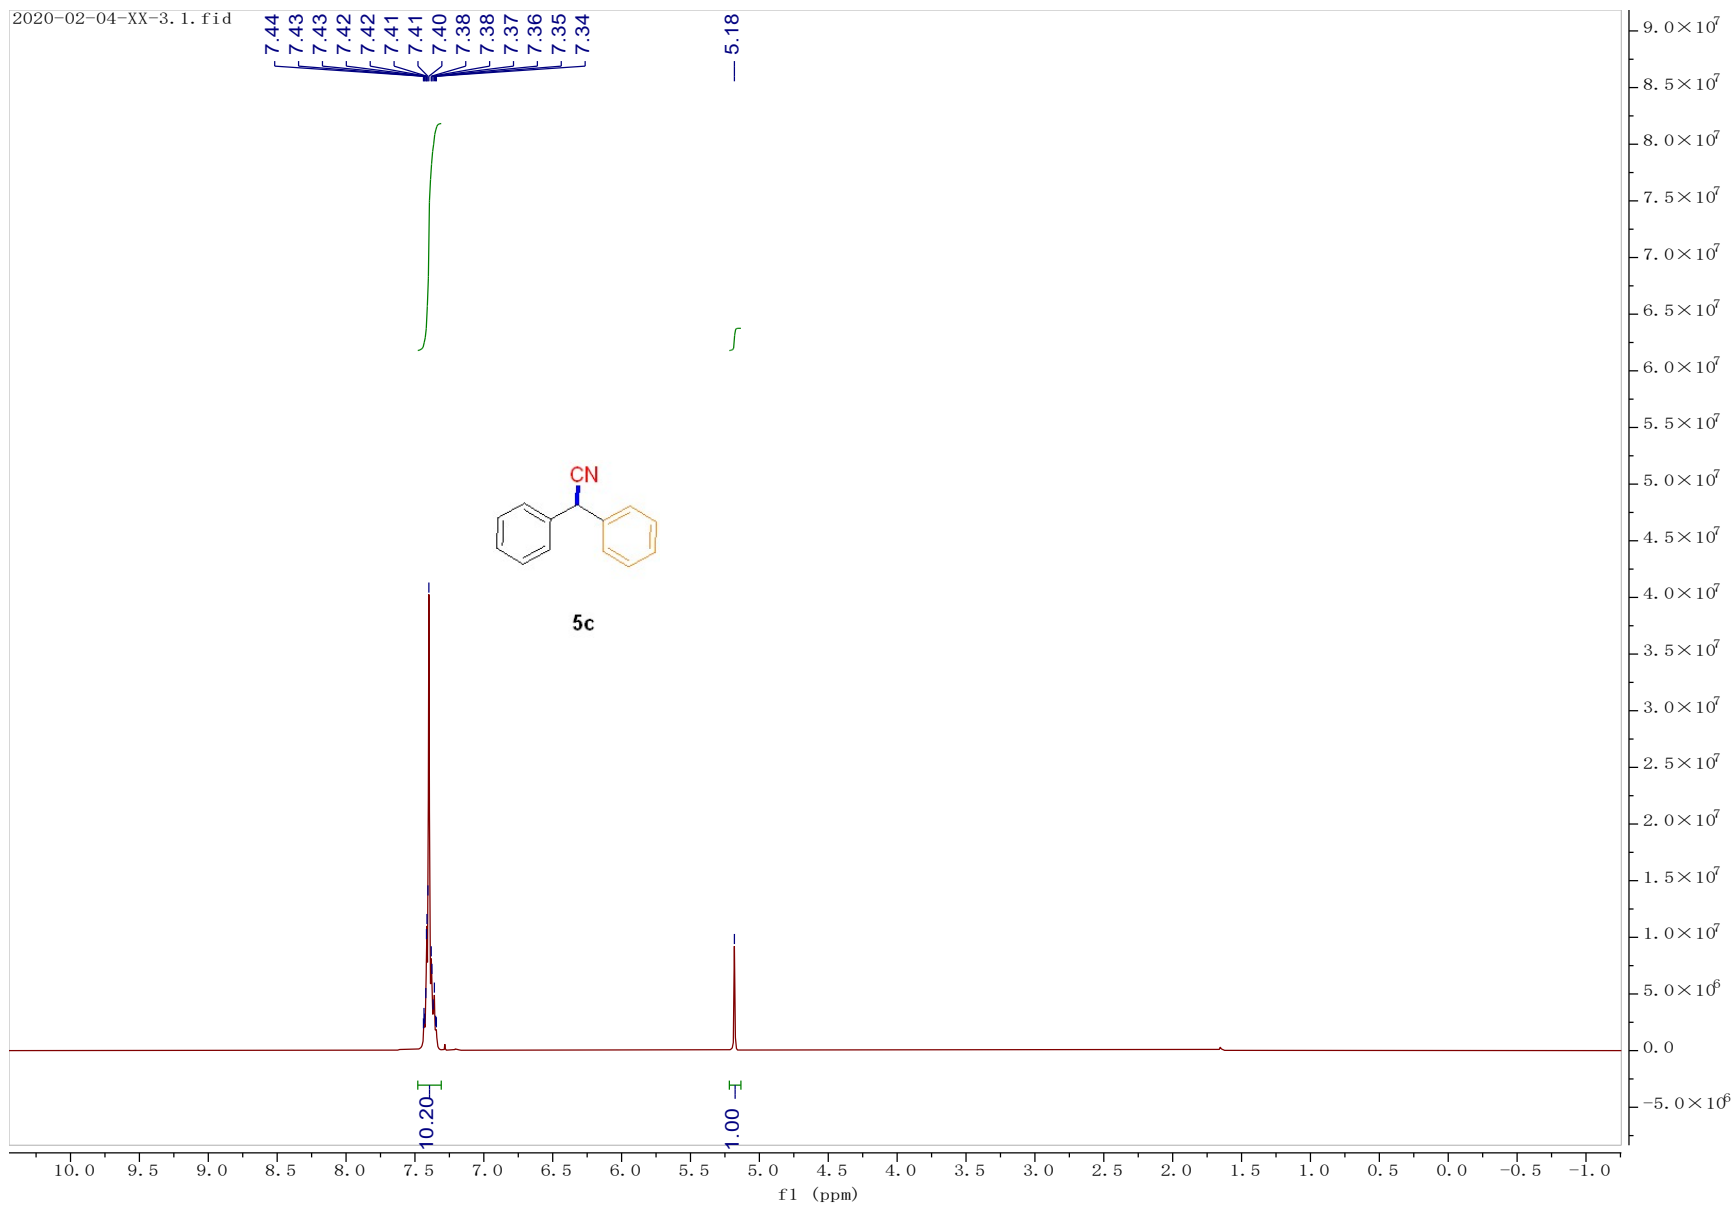

2020-02-04-XX-3. 2. fid

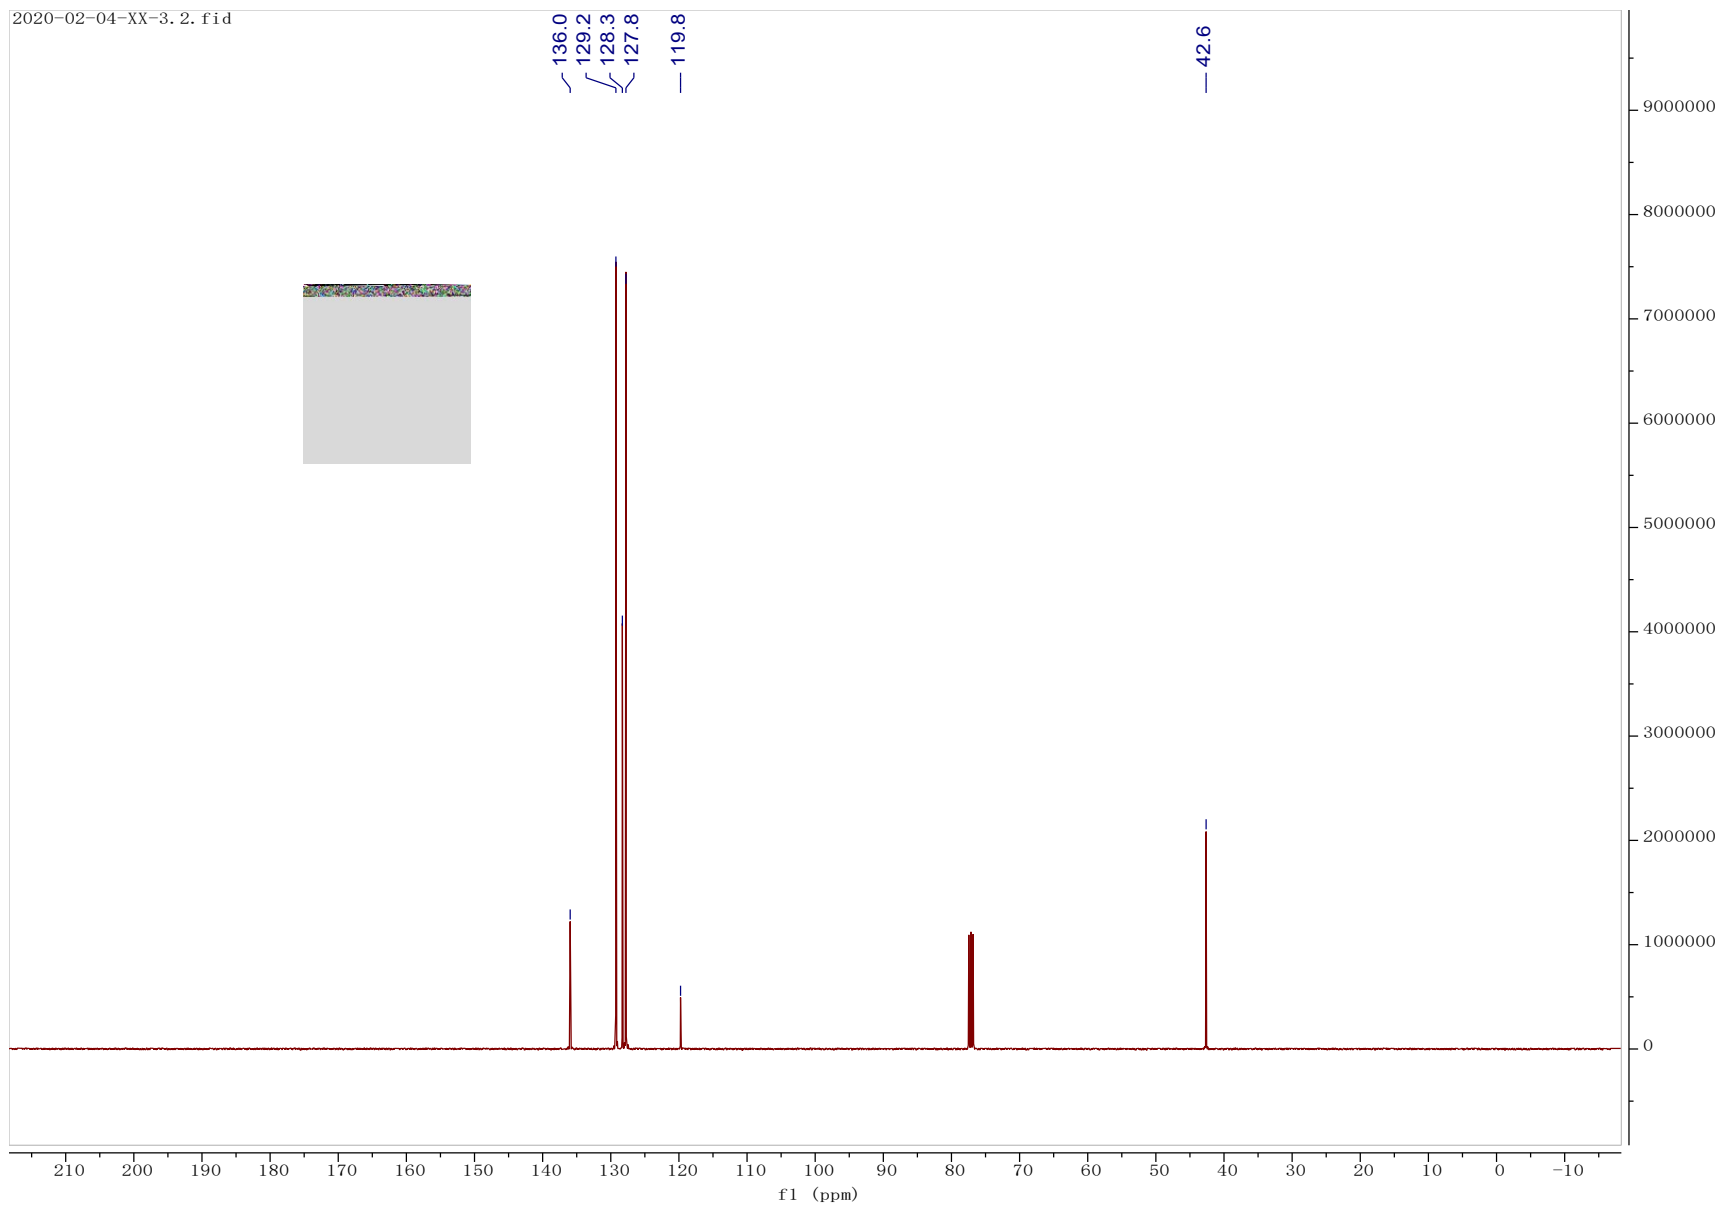

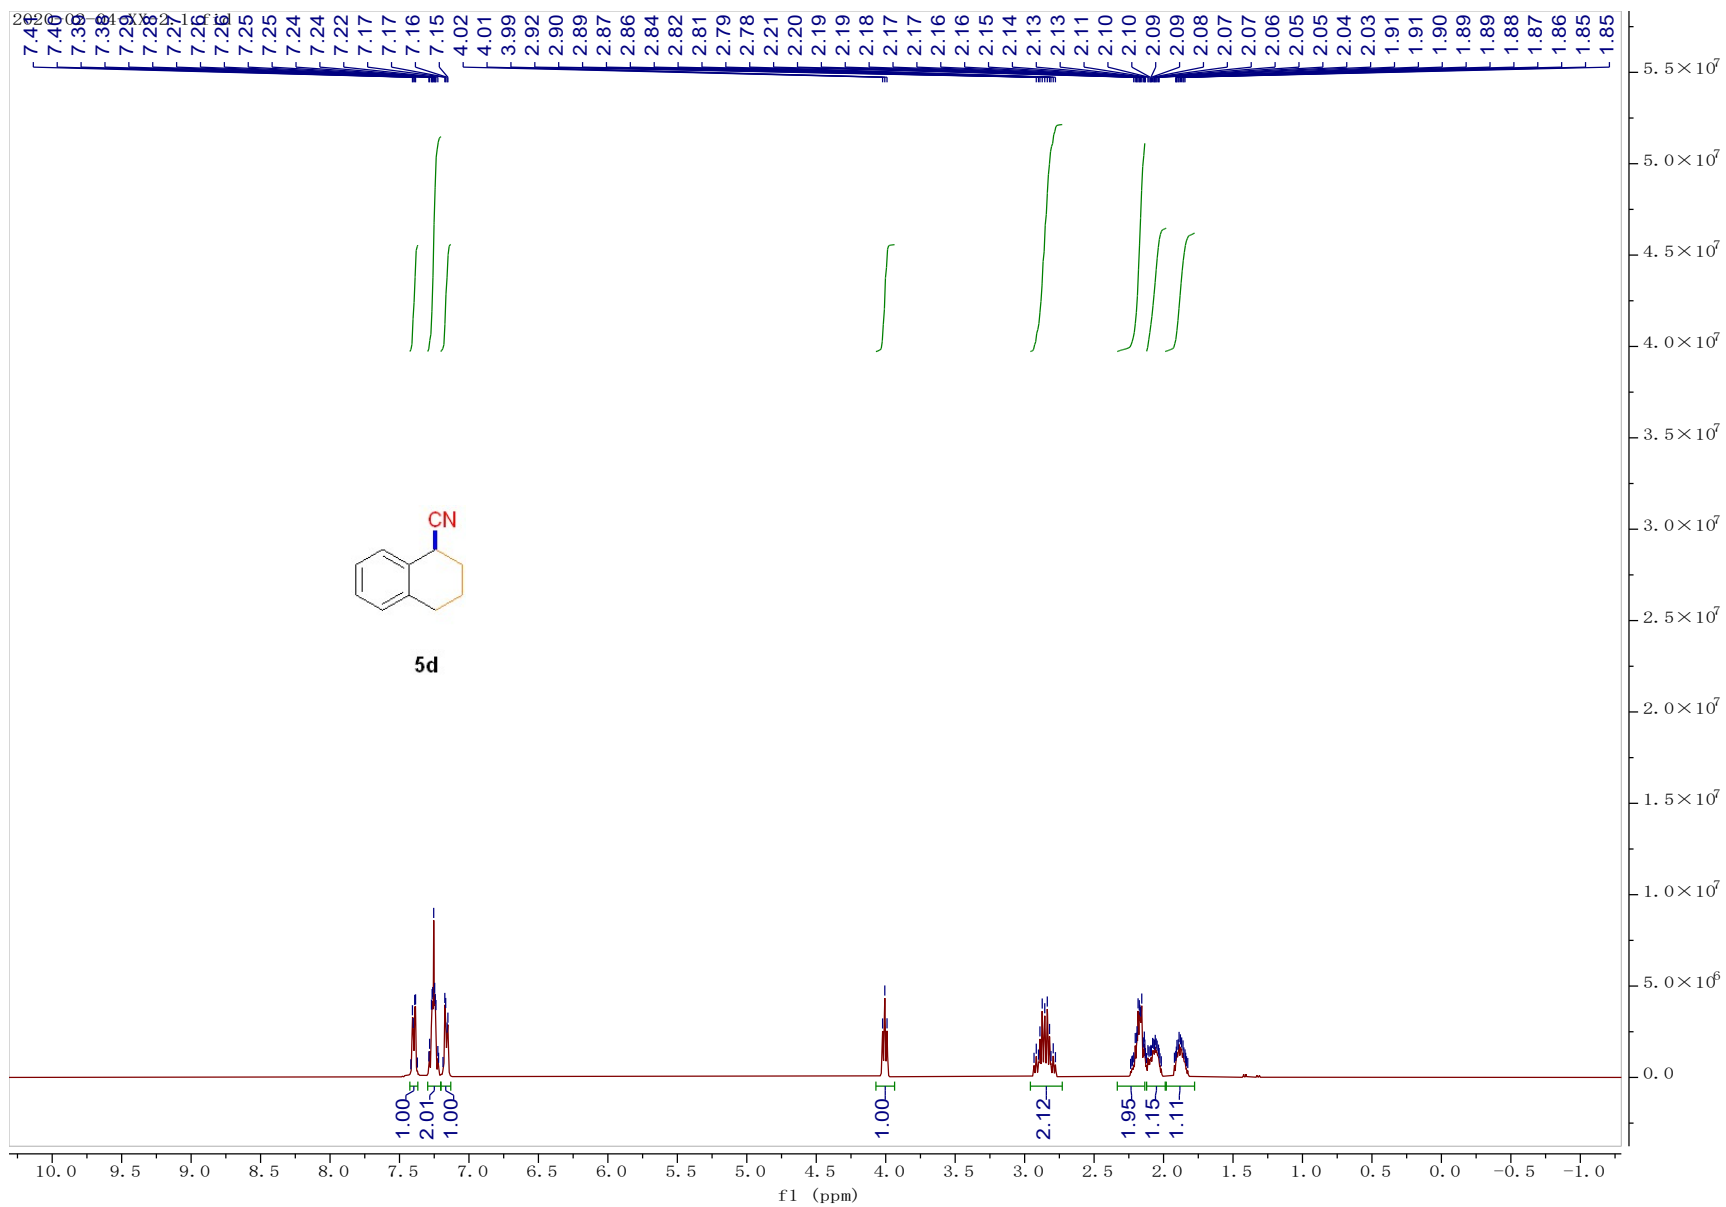

2020-02-04-XX-2. 2. fid

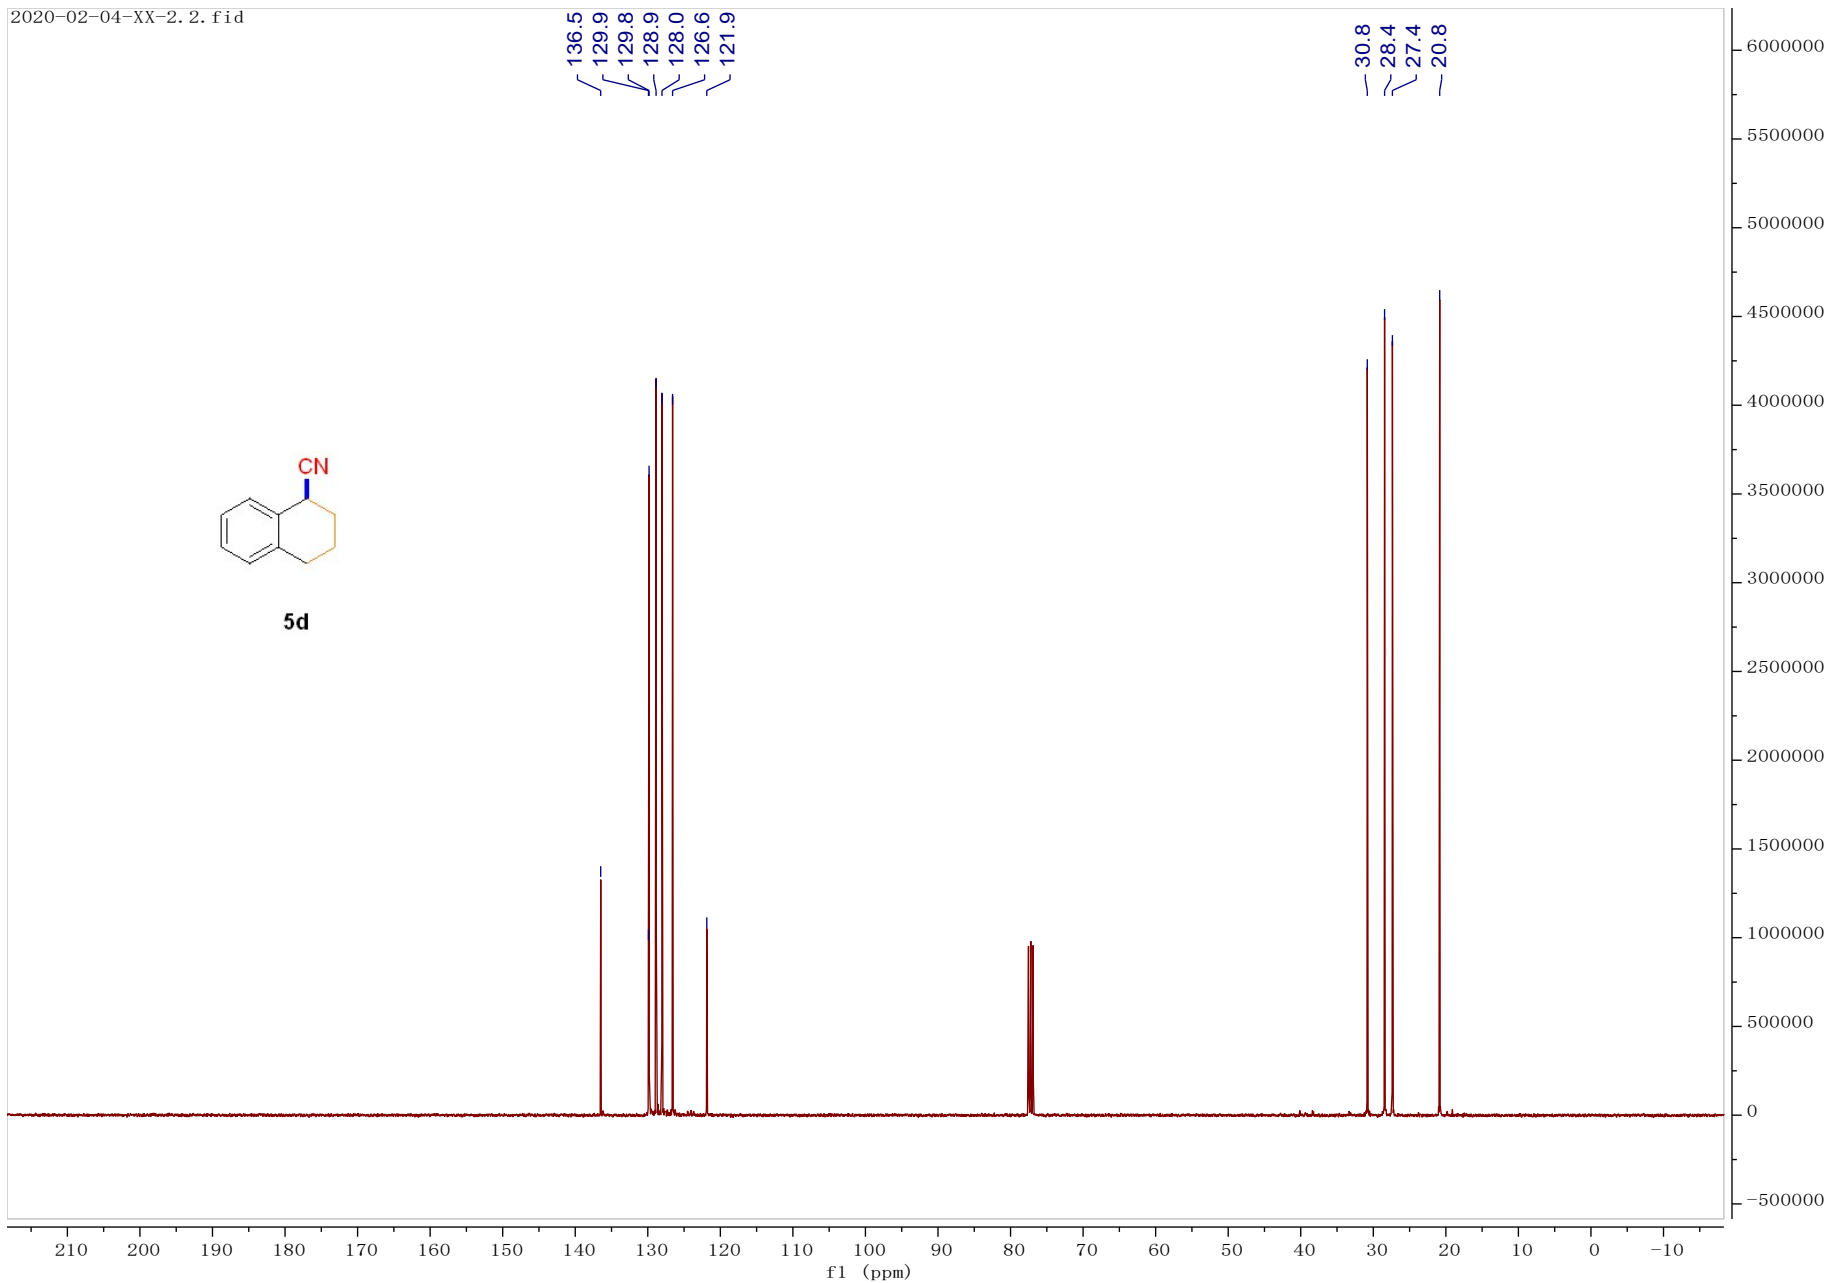



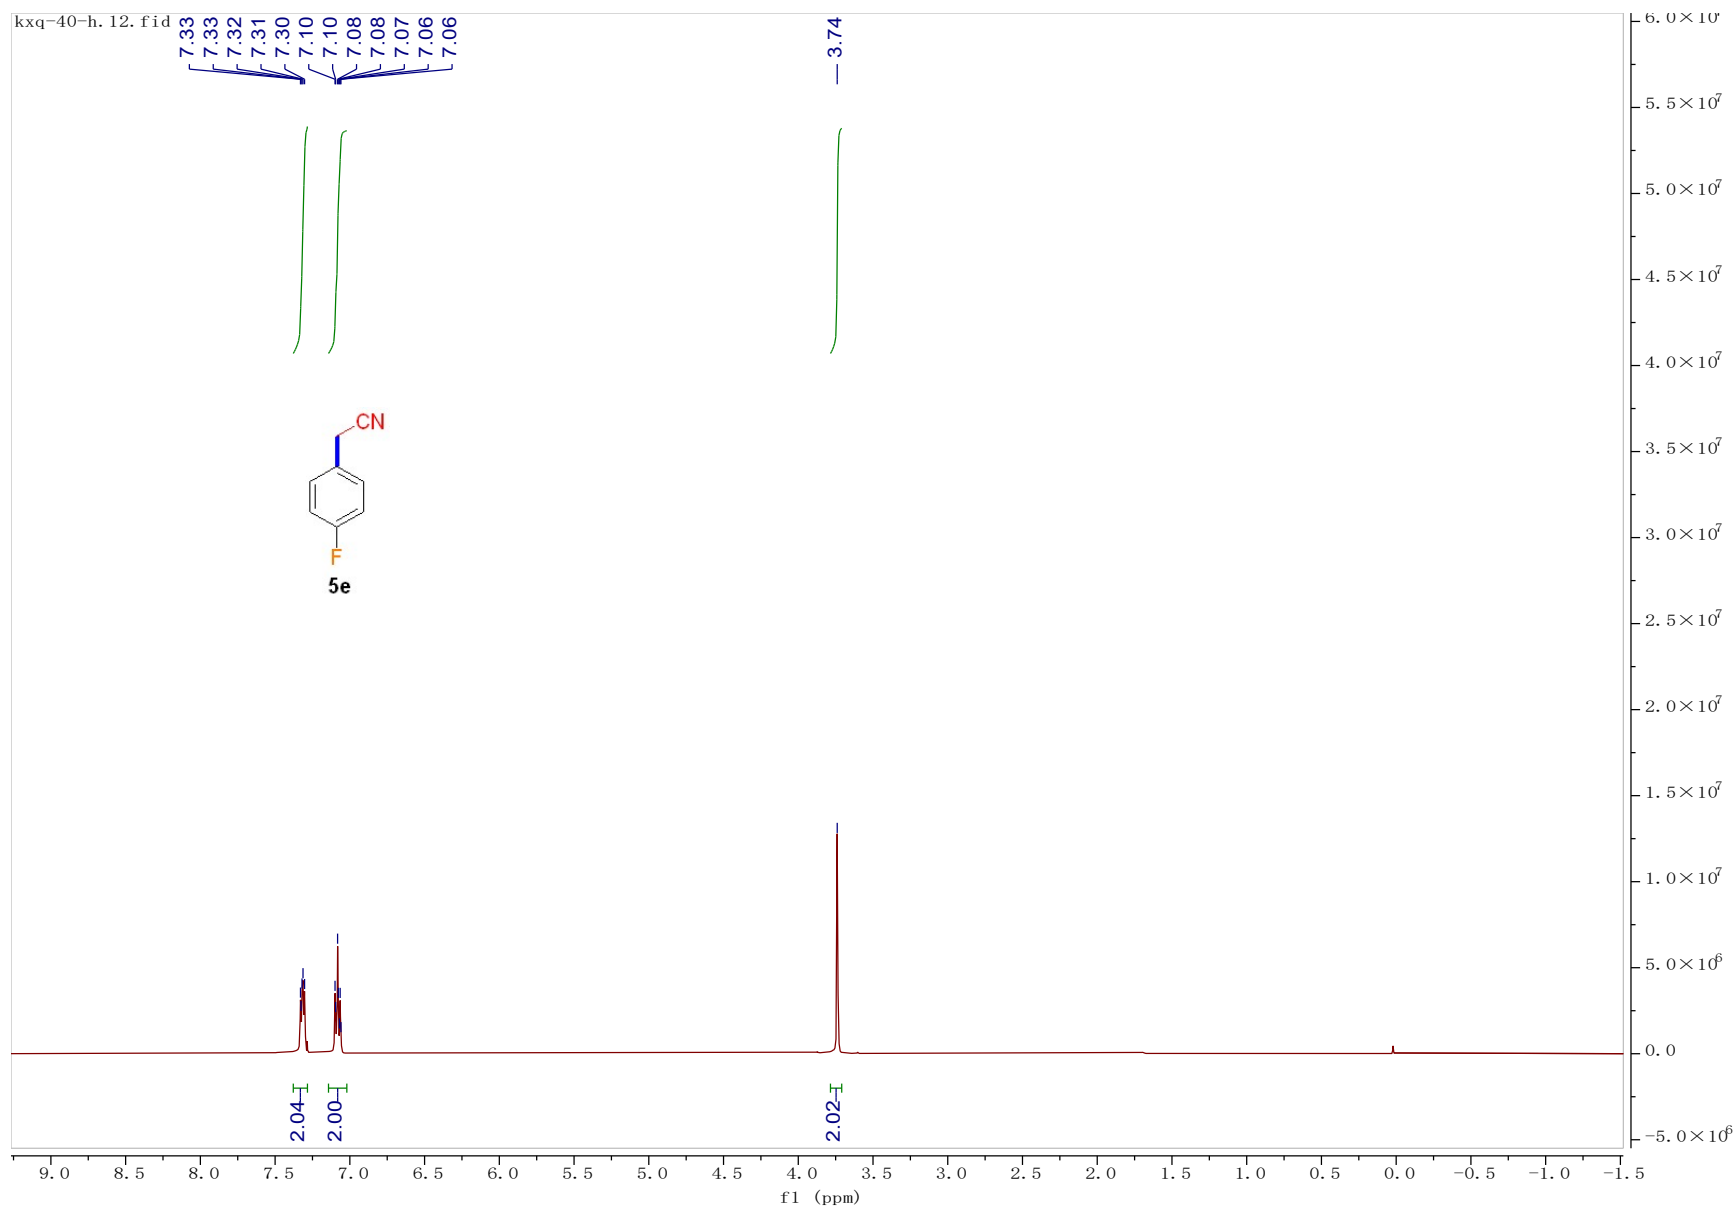

kxq-40-f19.14.fid

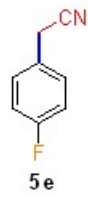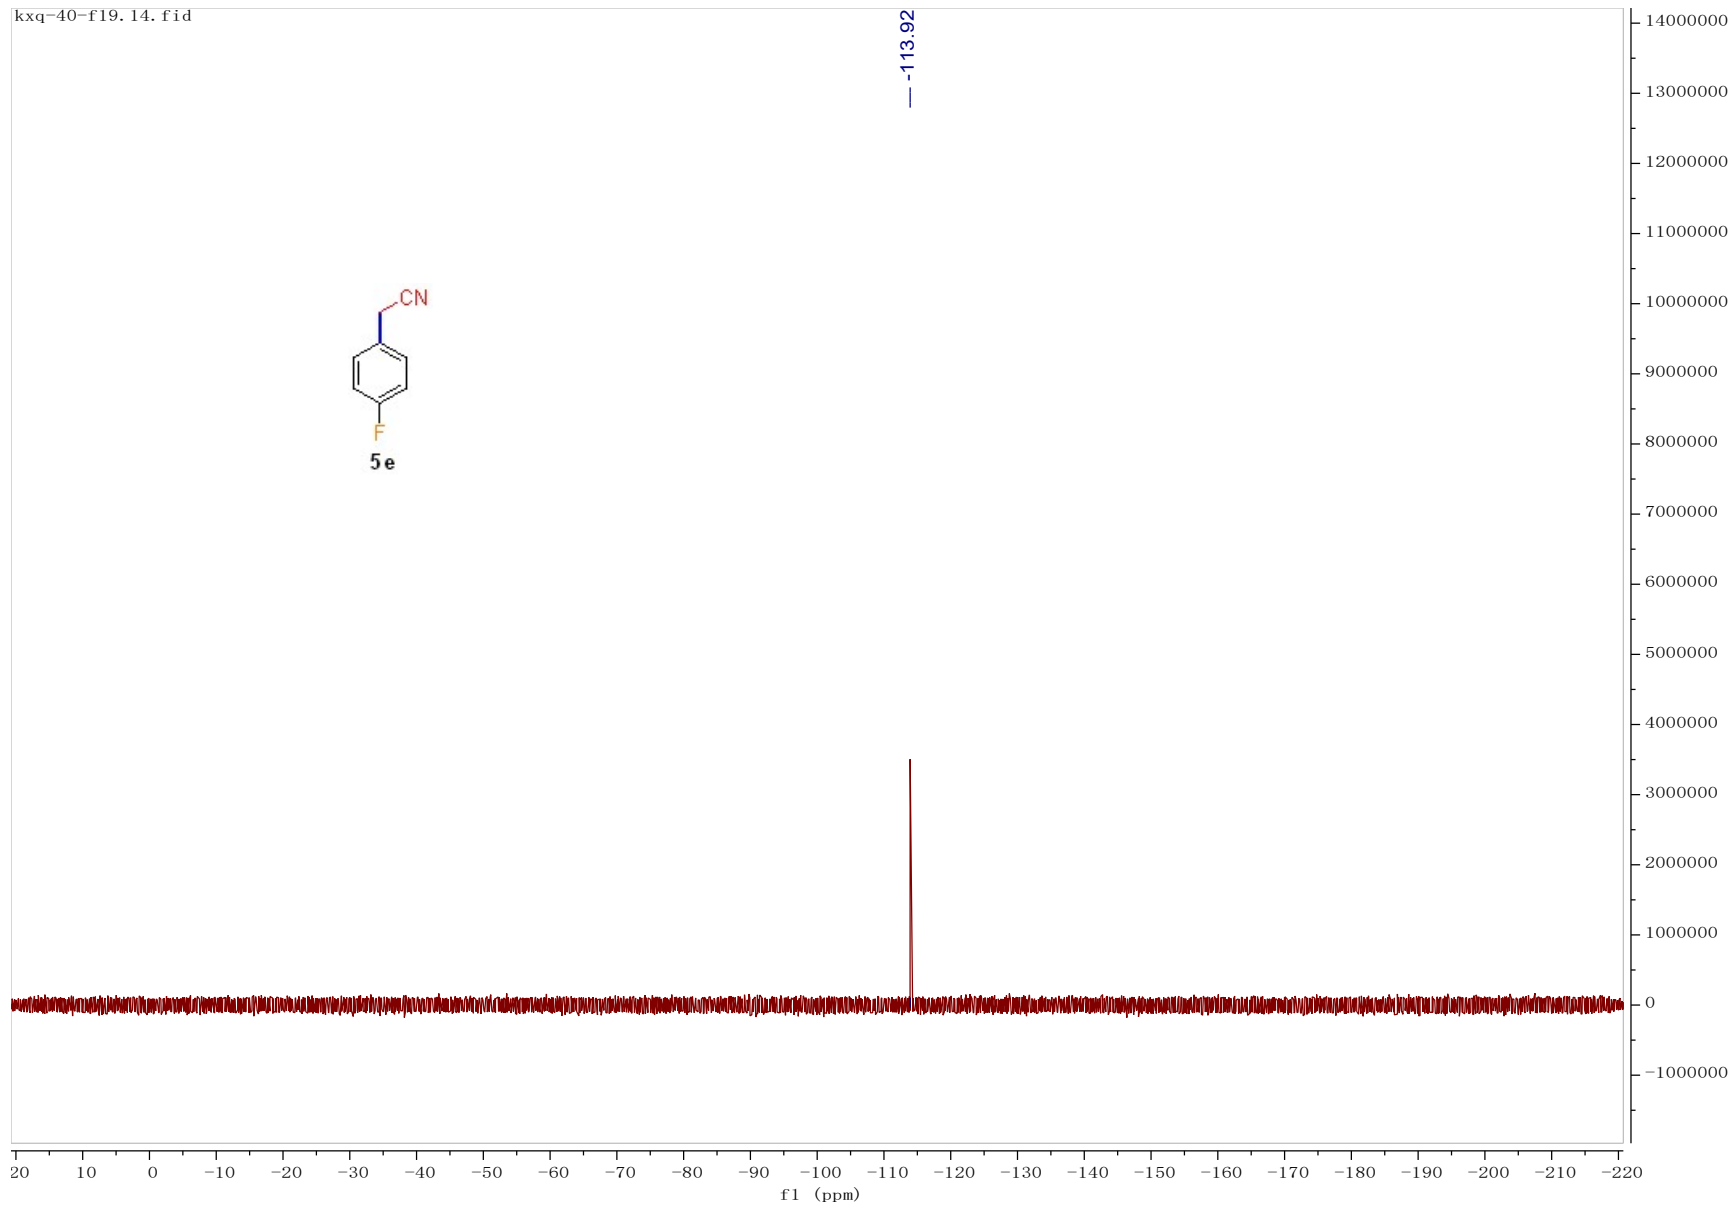

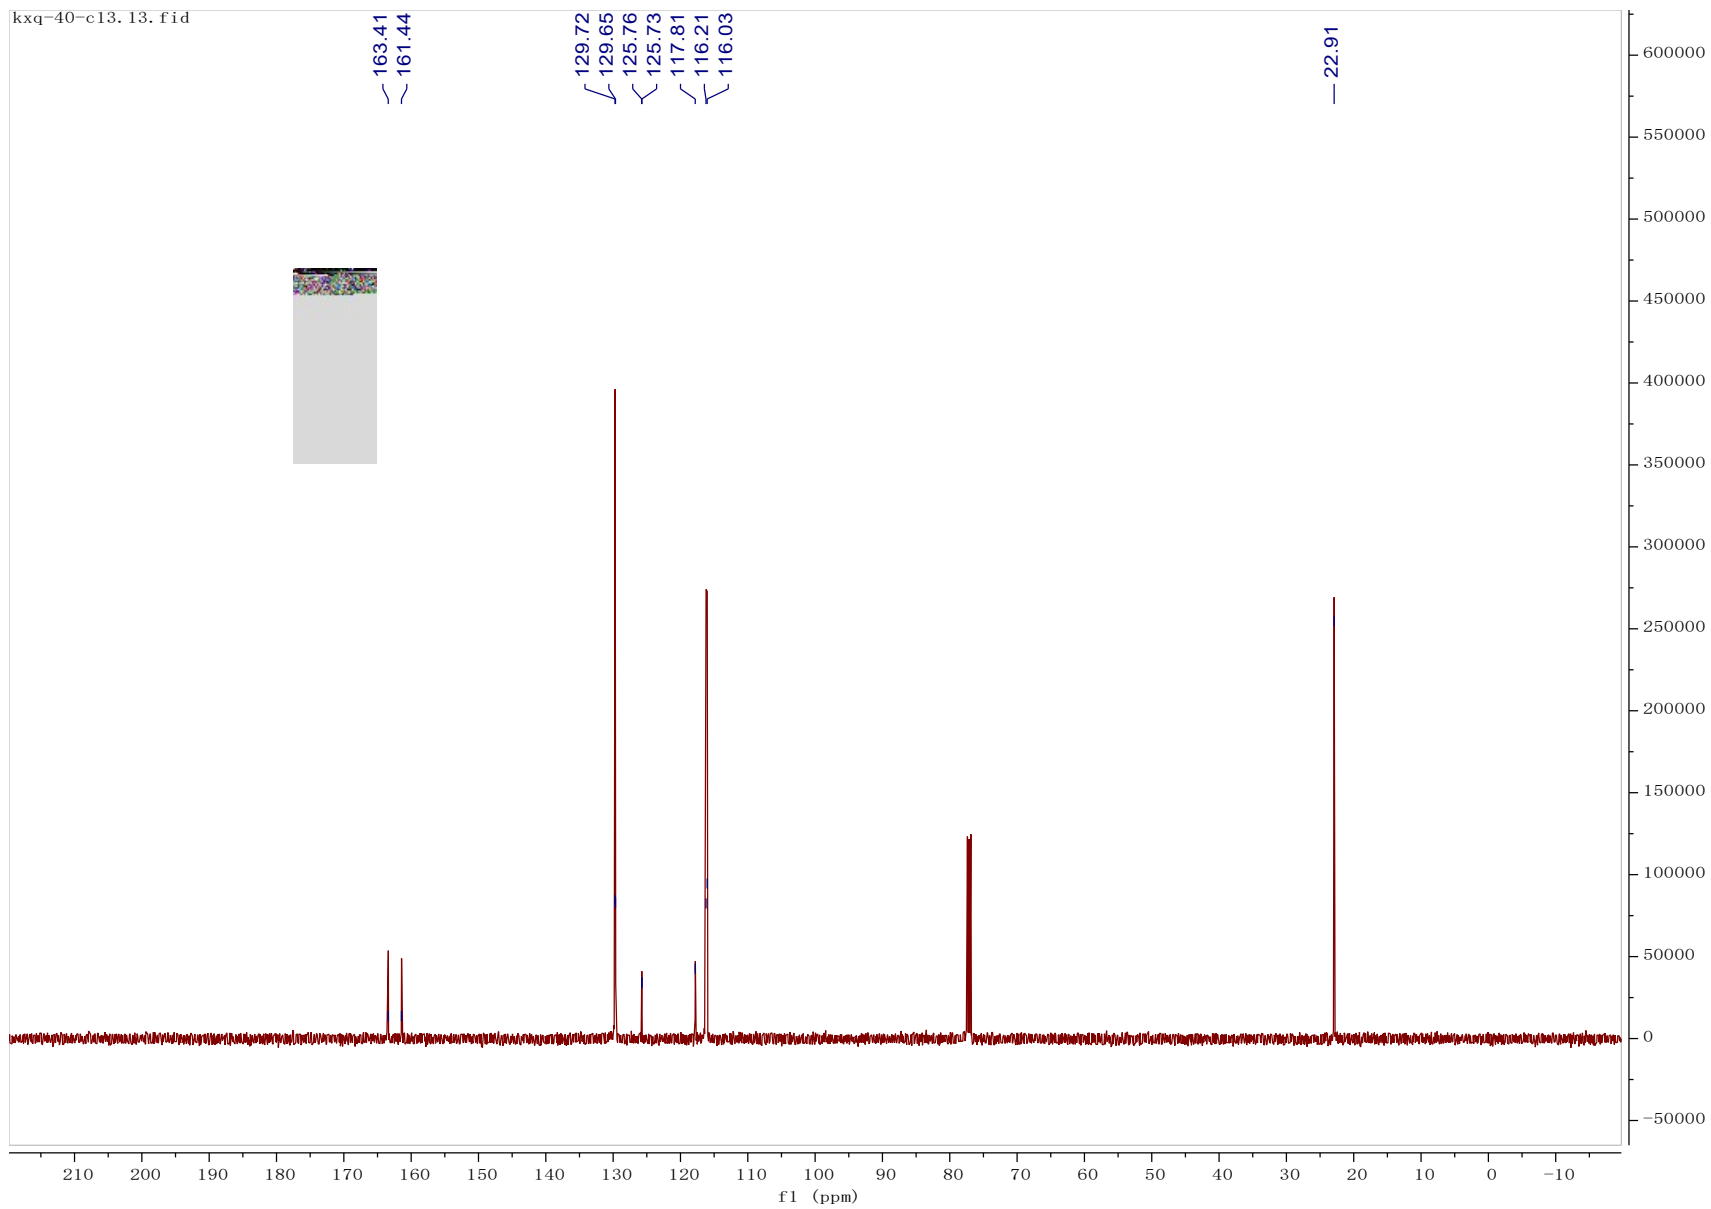

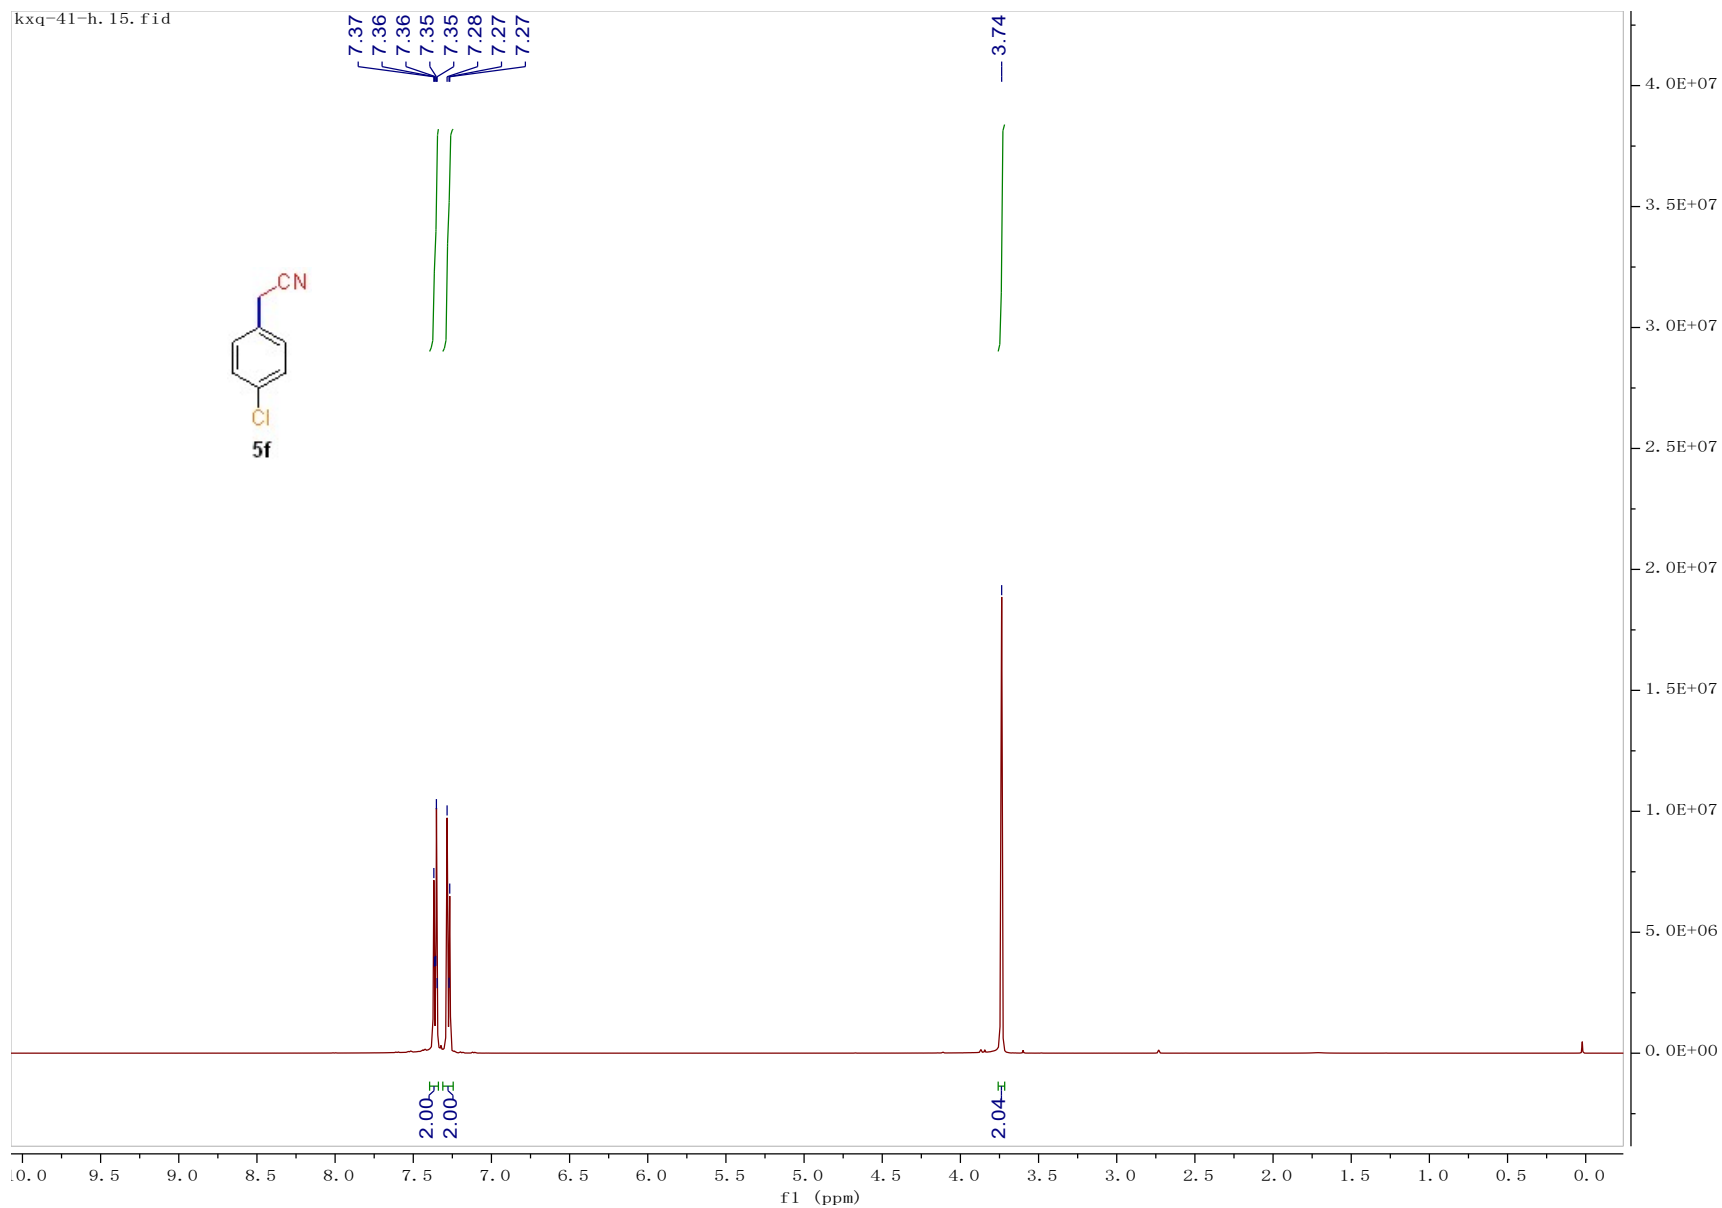

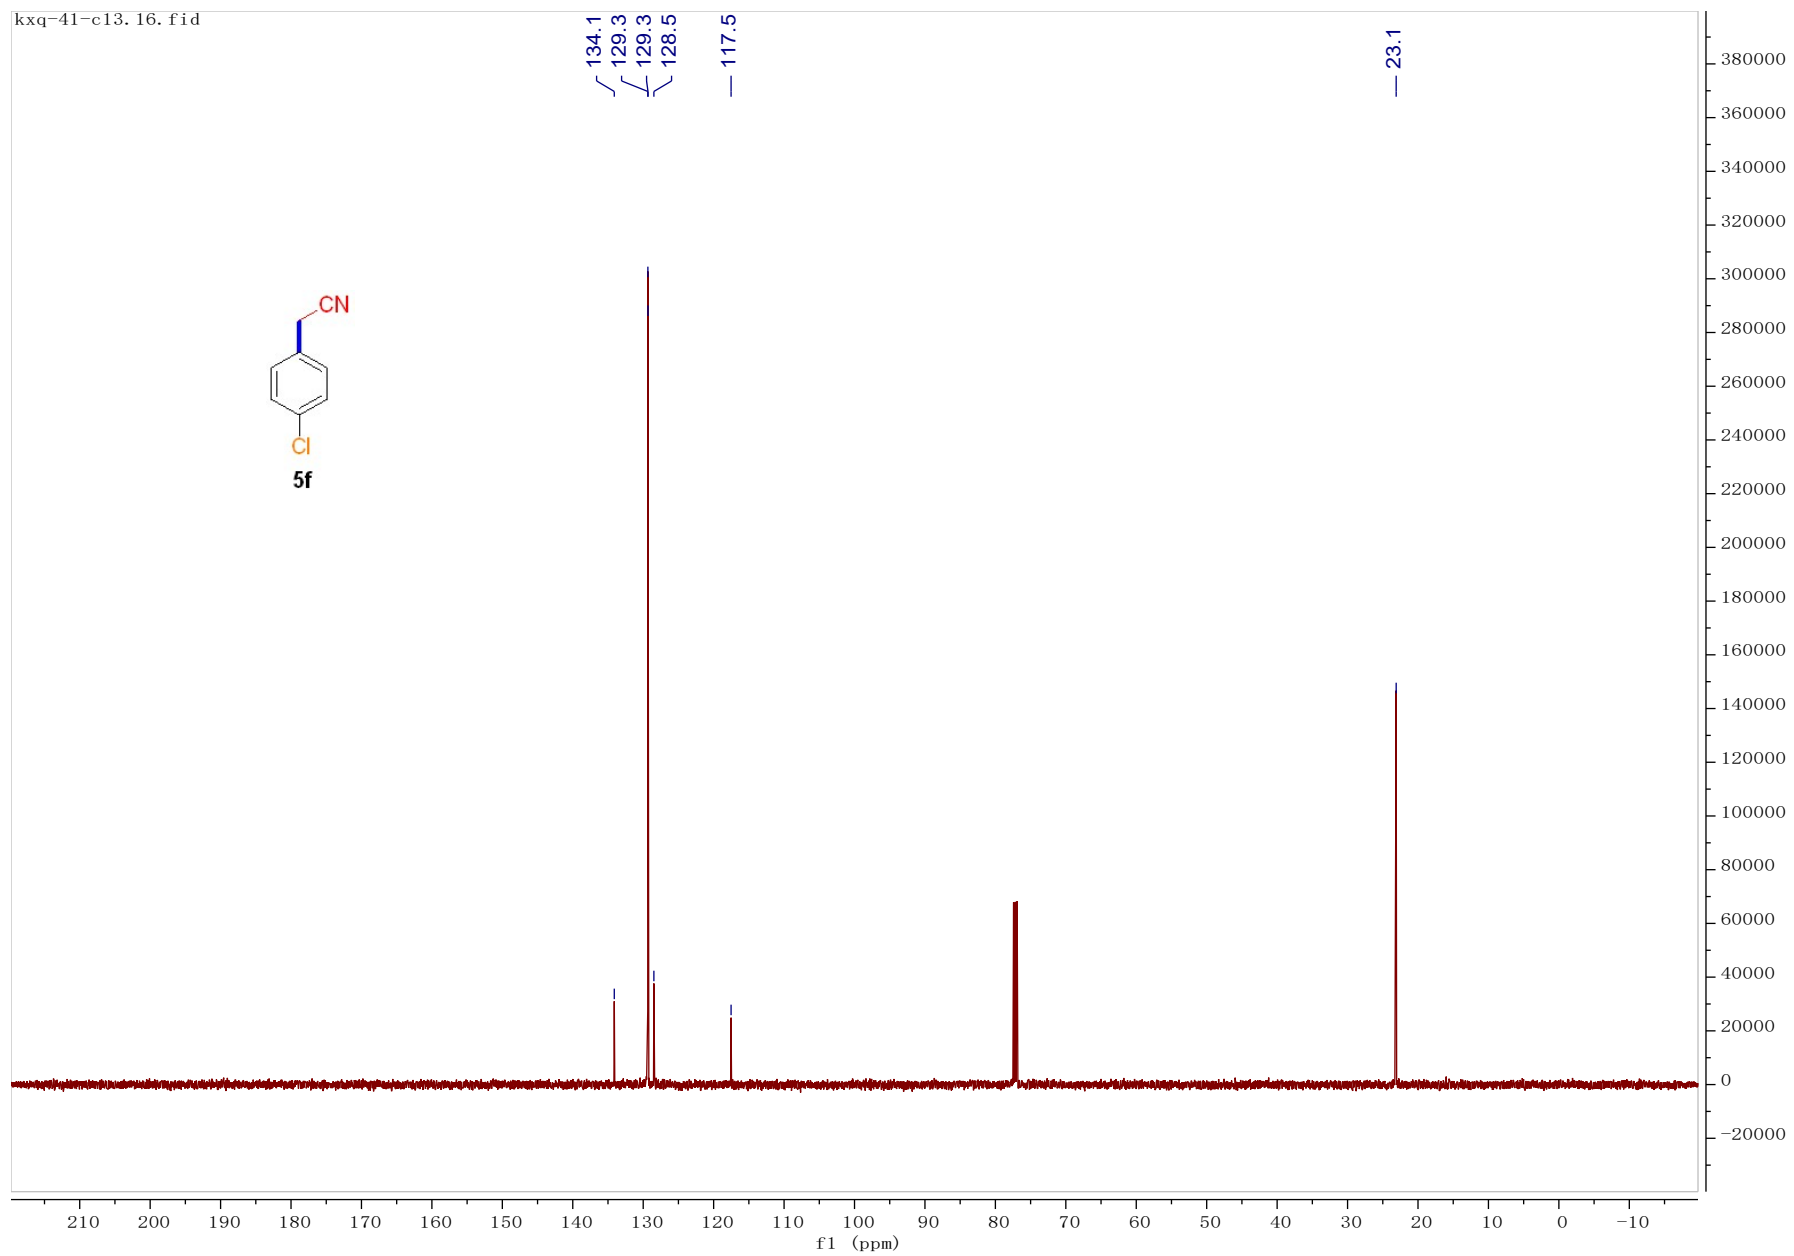

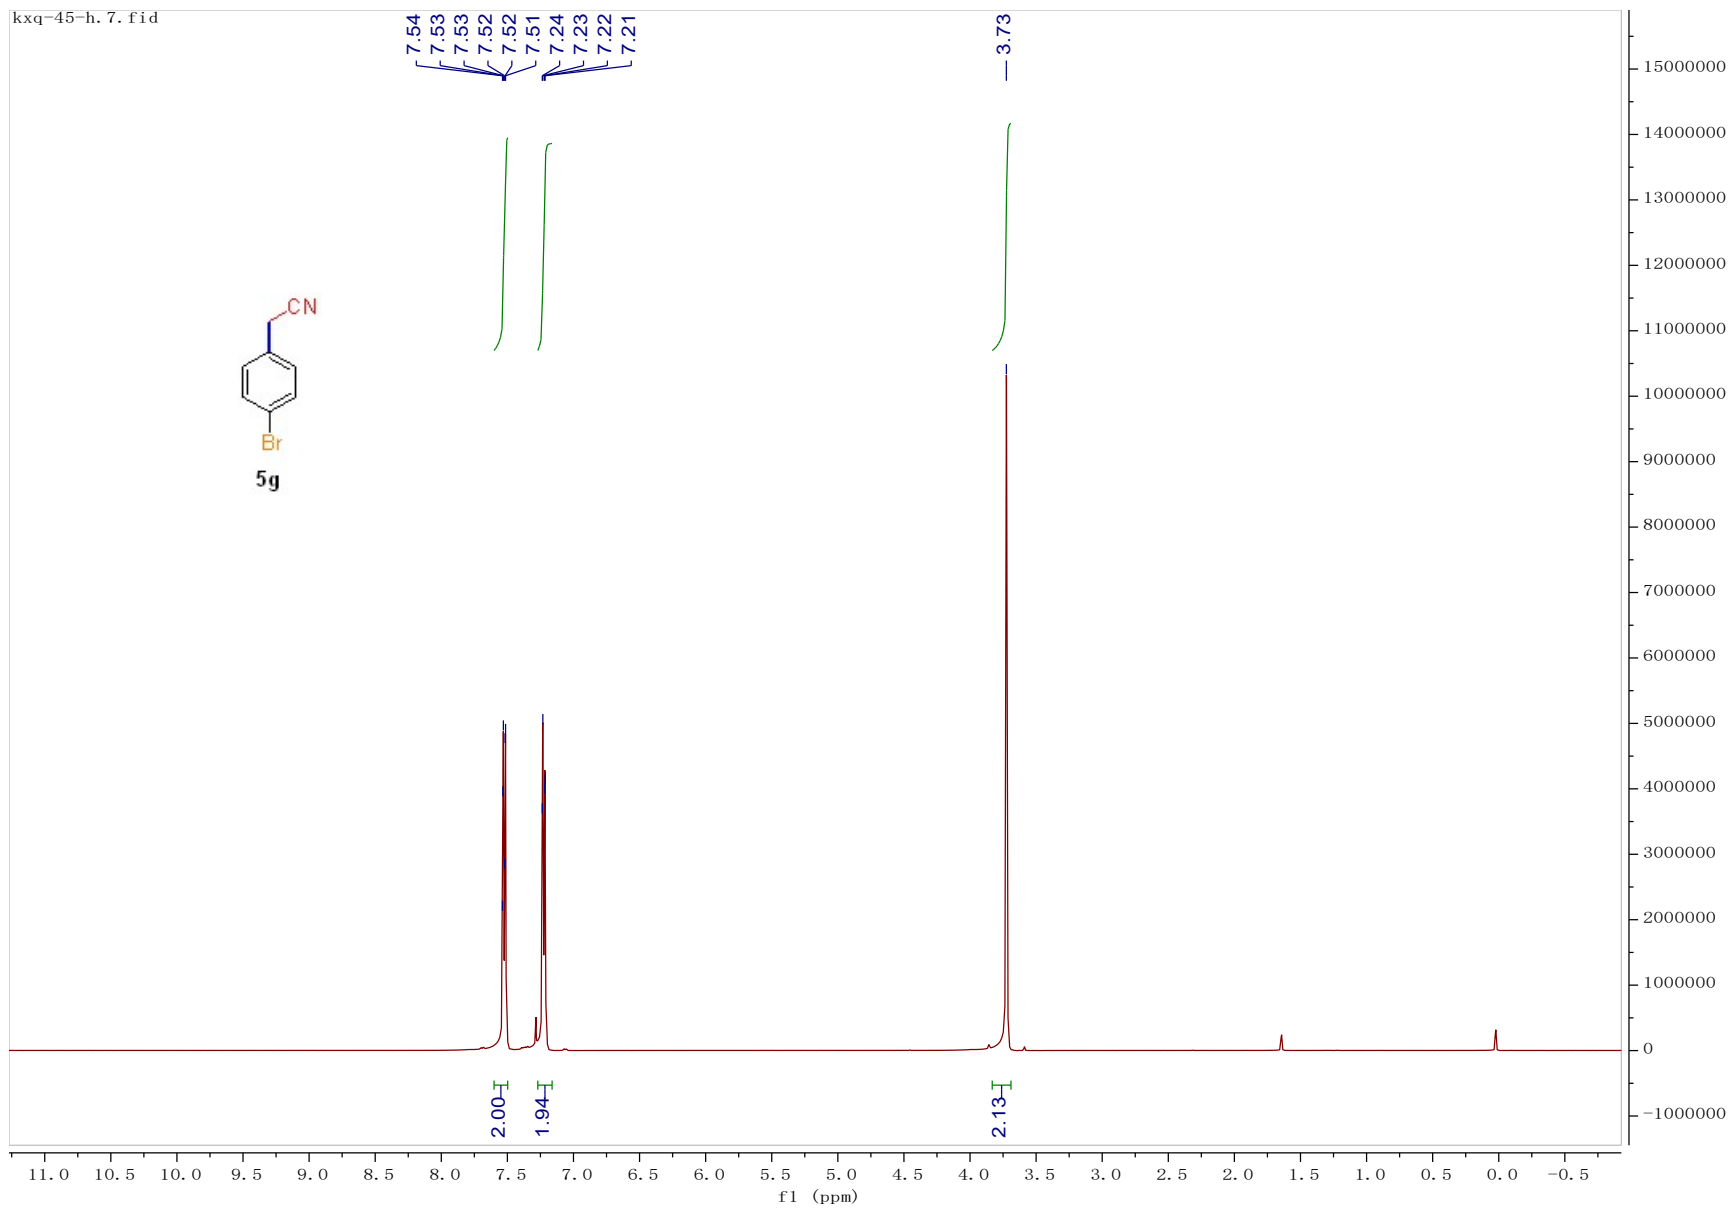

kxq-45-c13. 8. fid

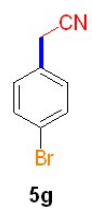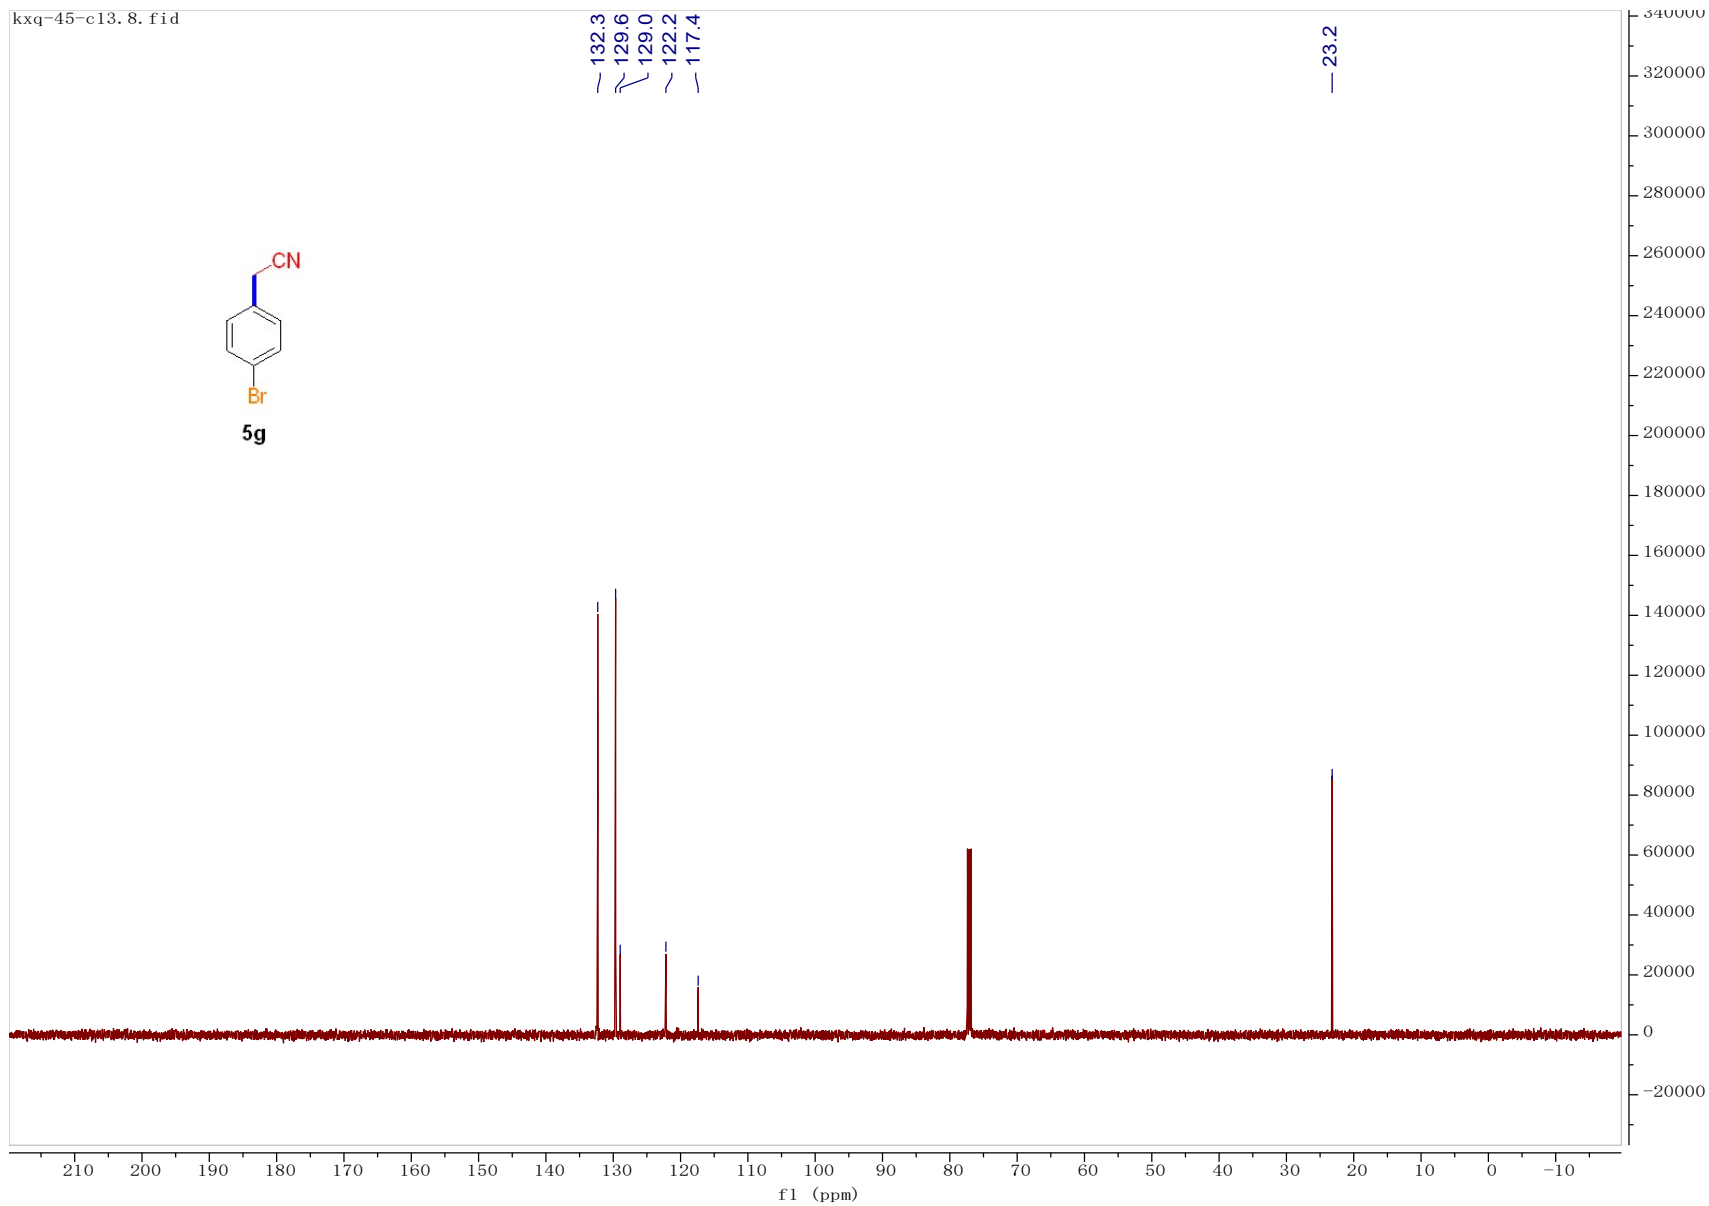

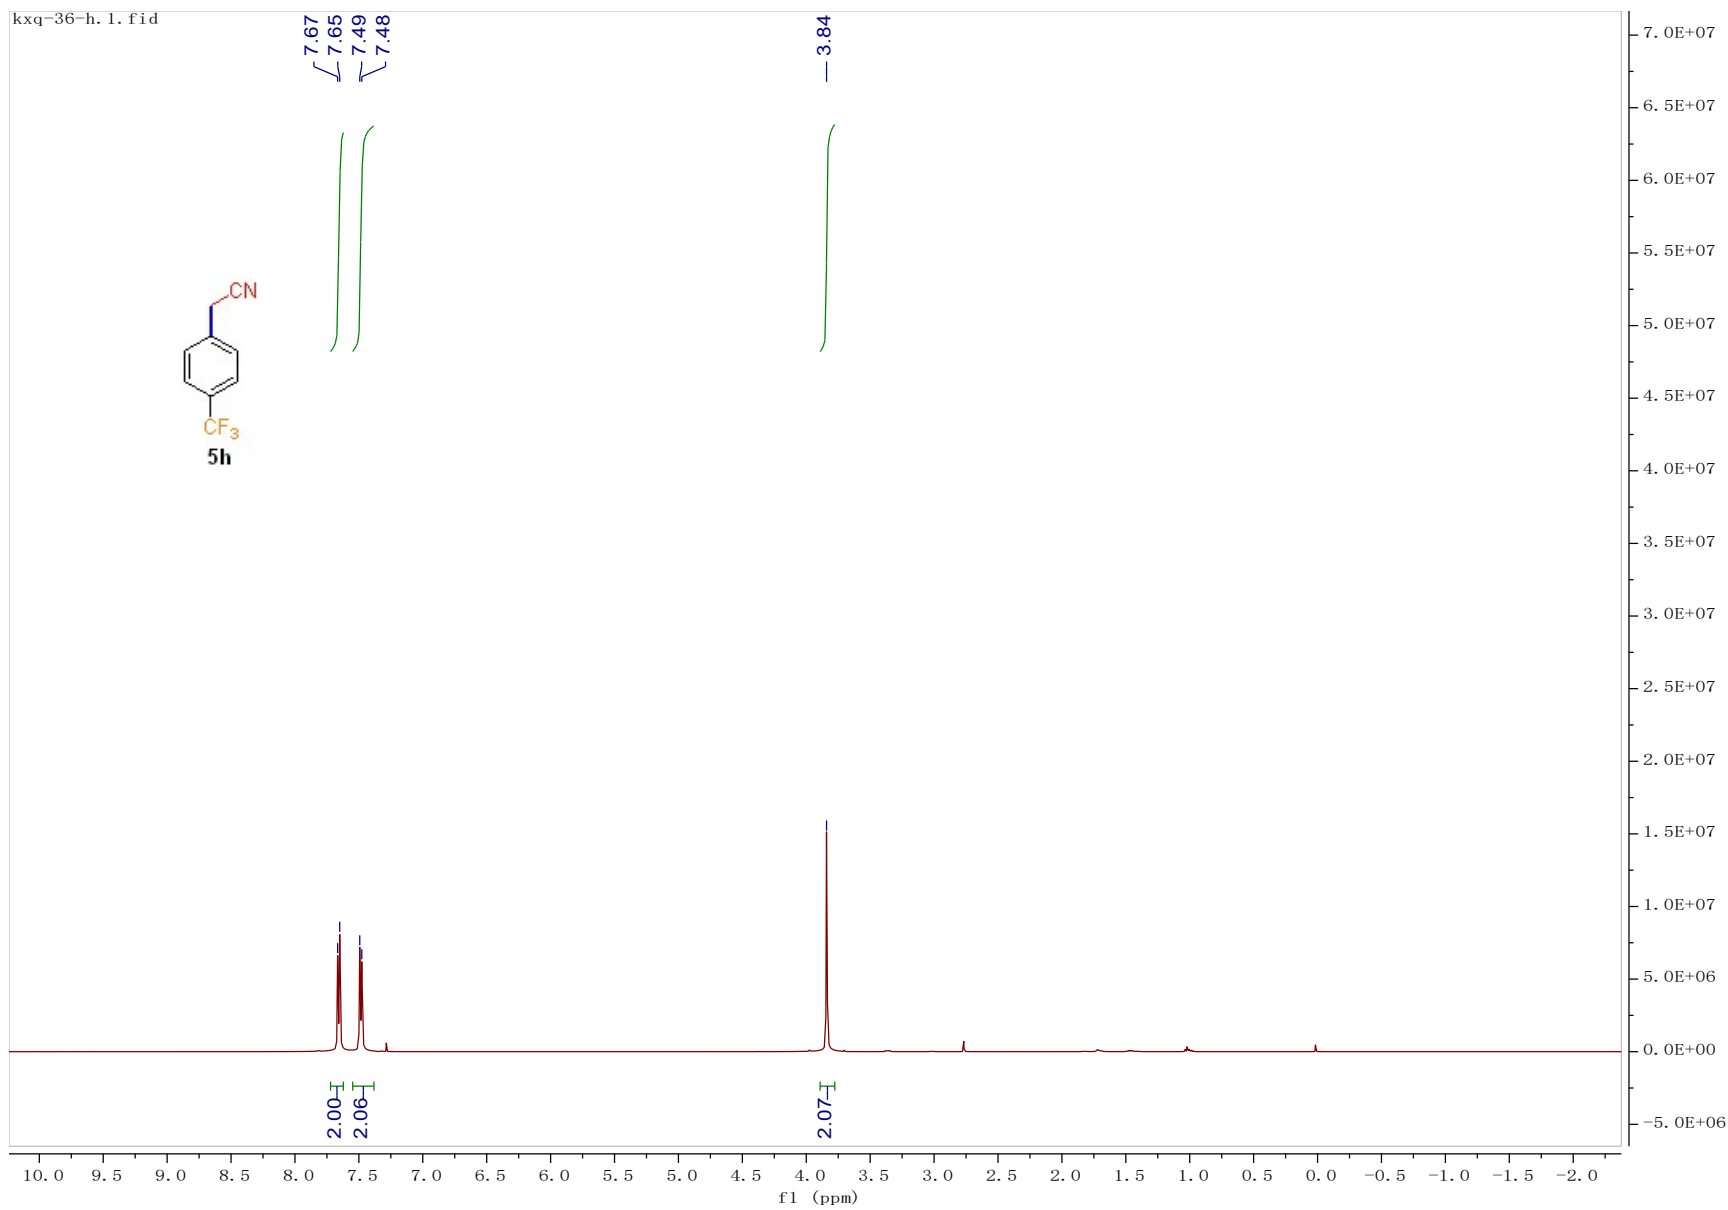



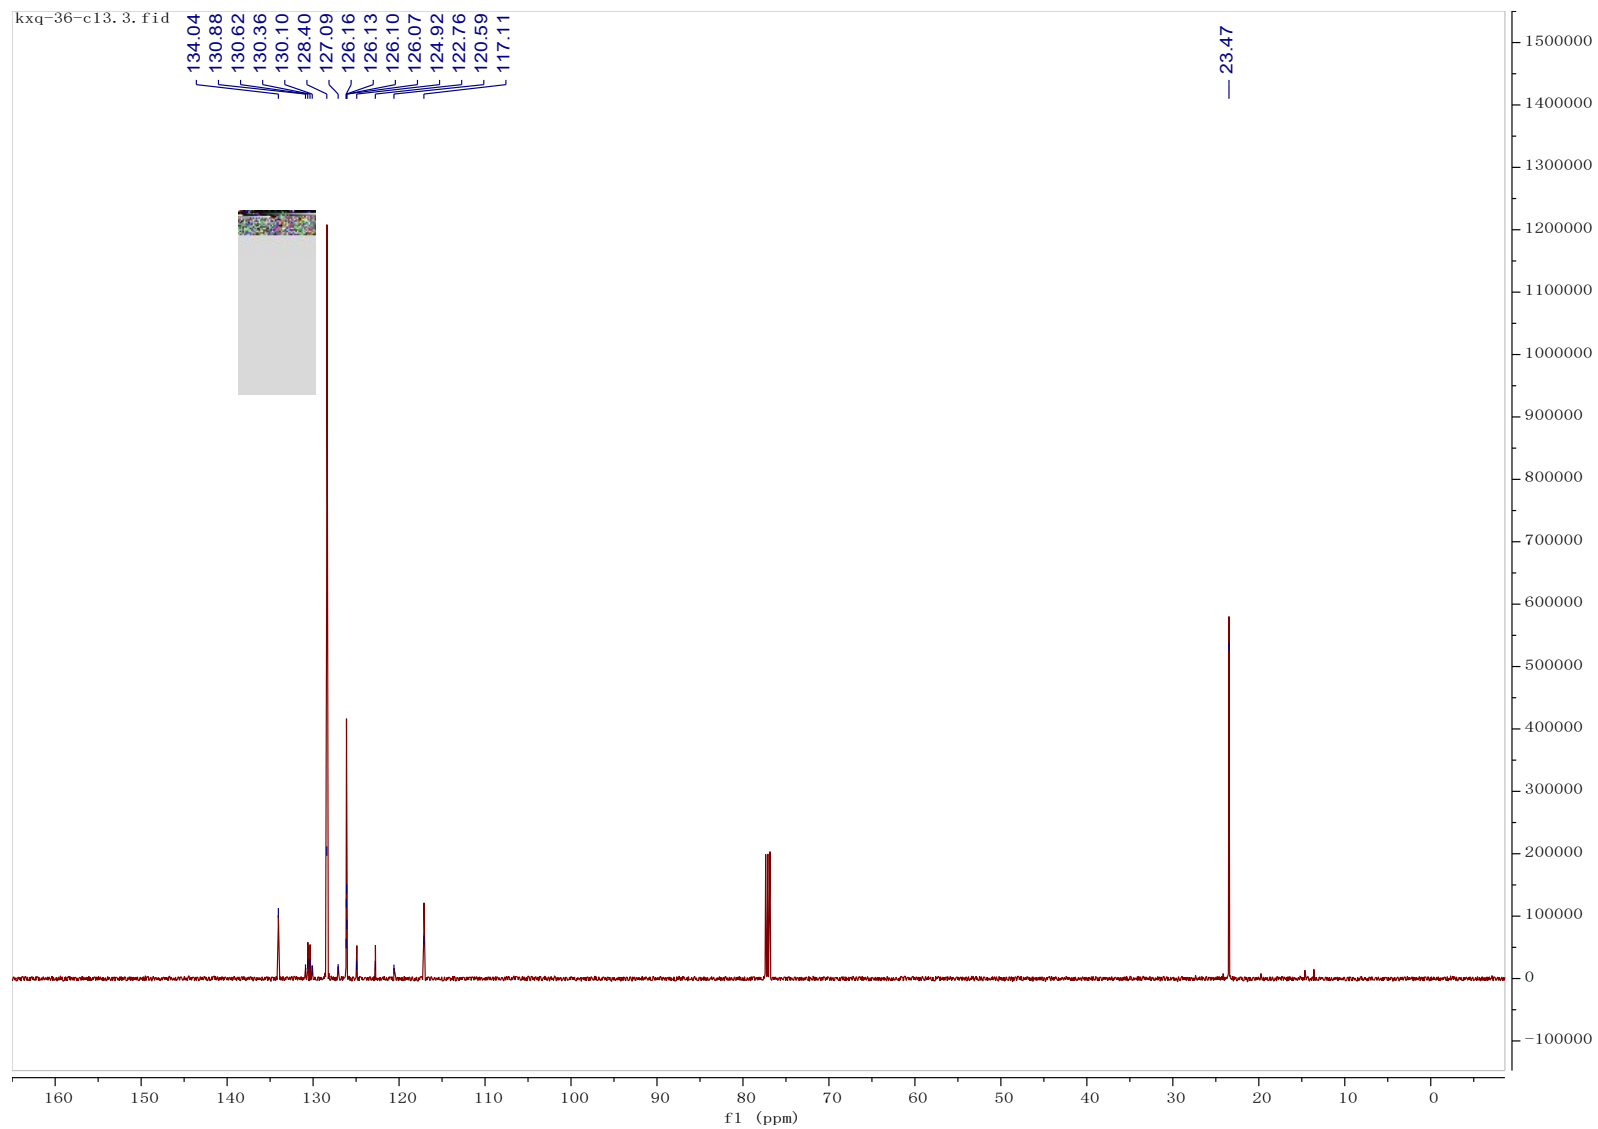

kxq-36-f19.4.fid

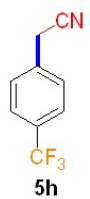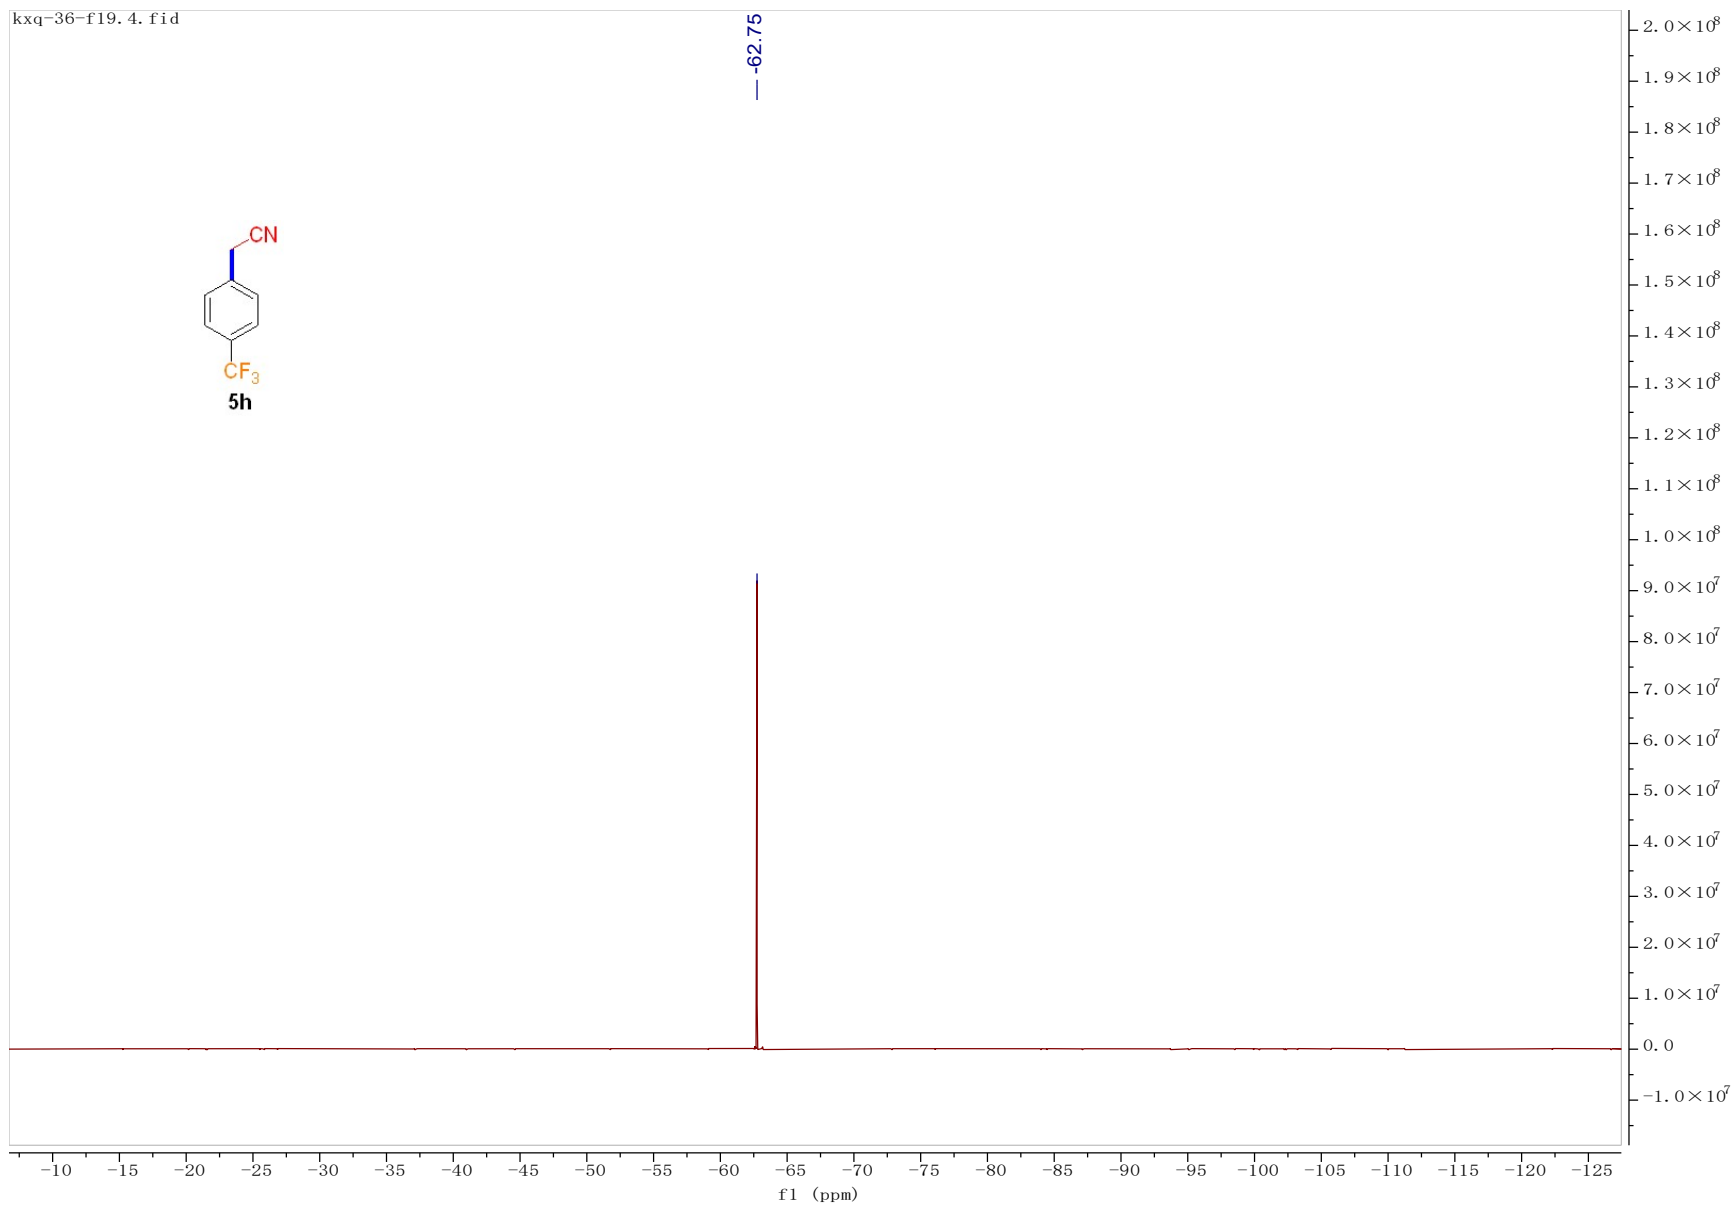

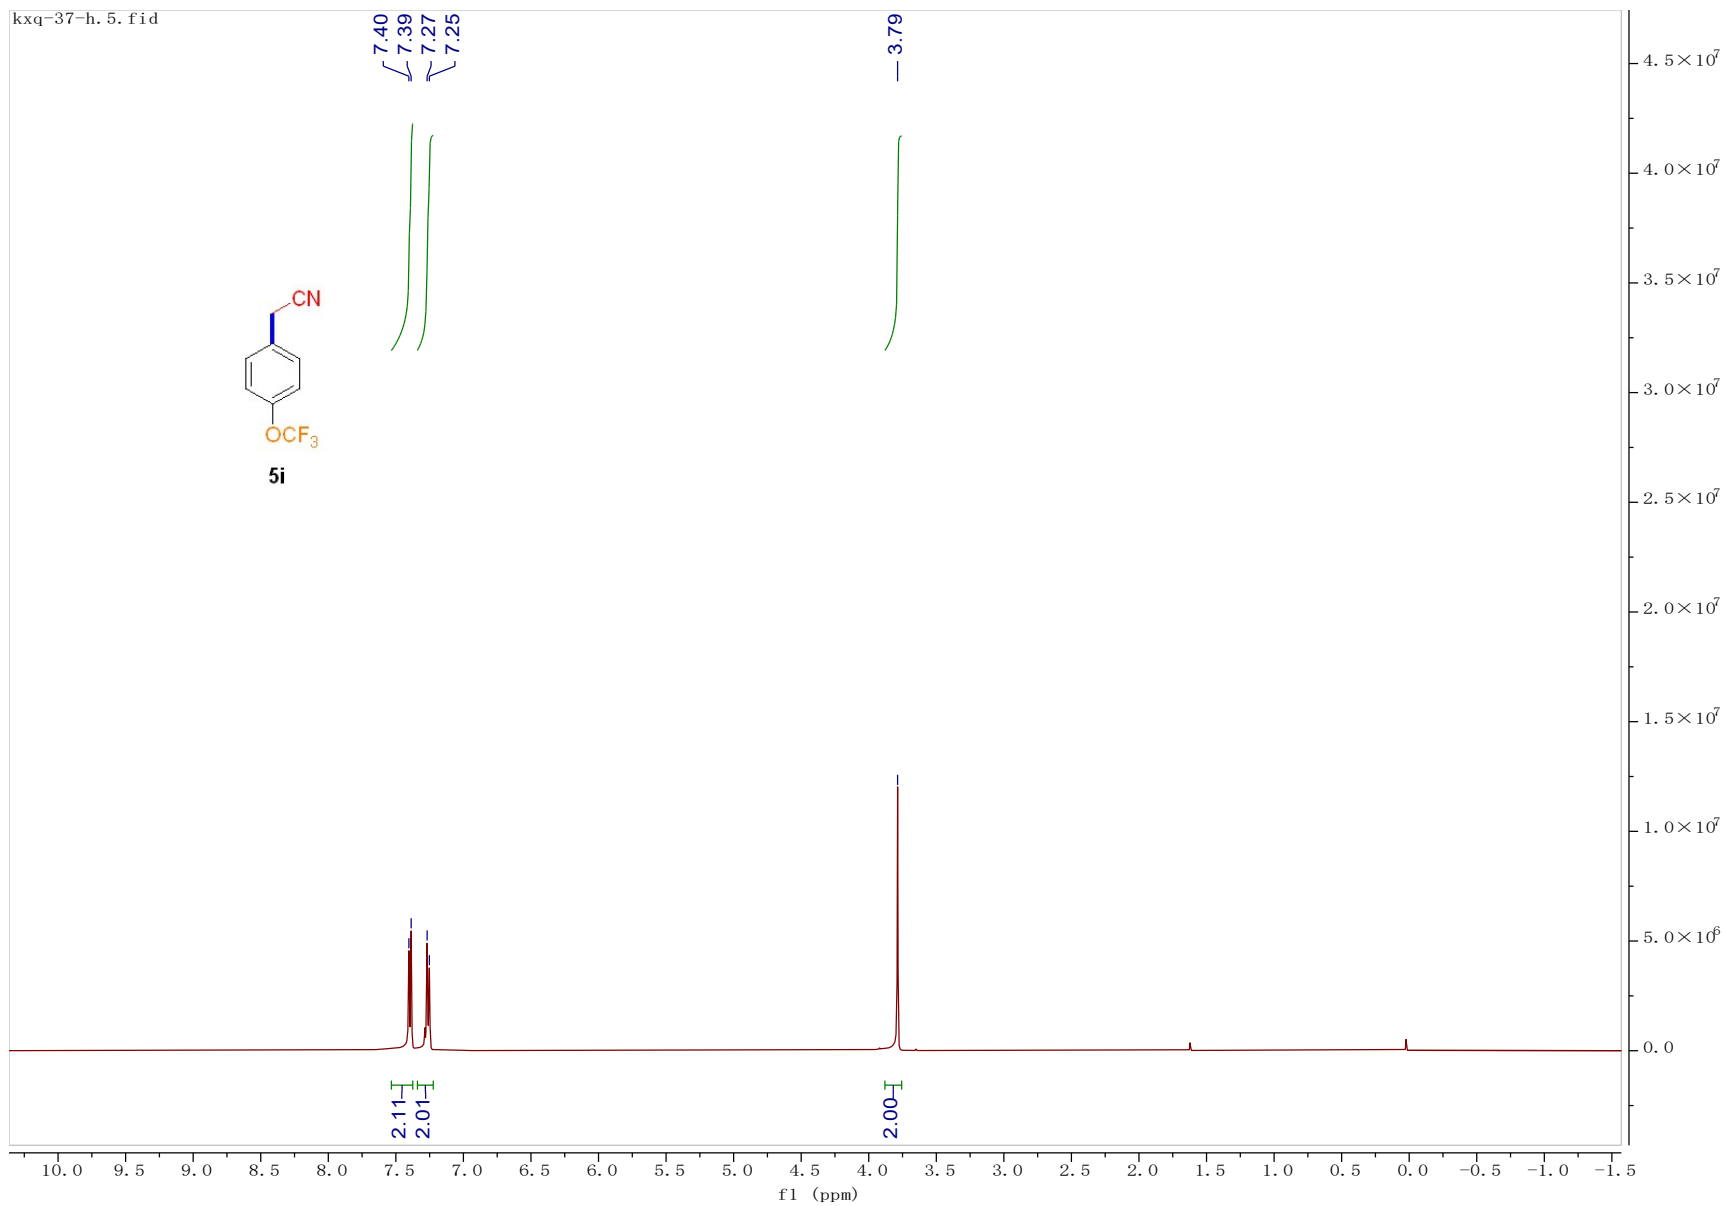

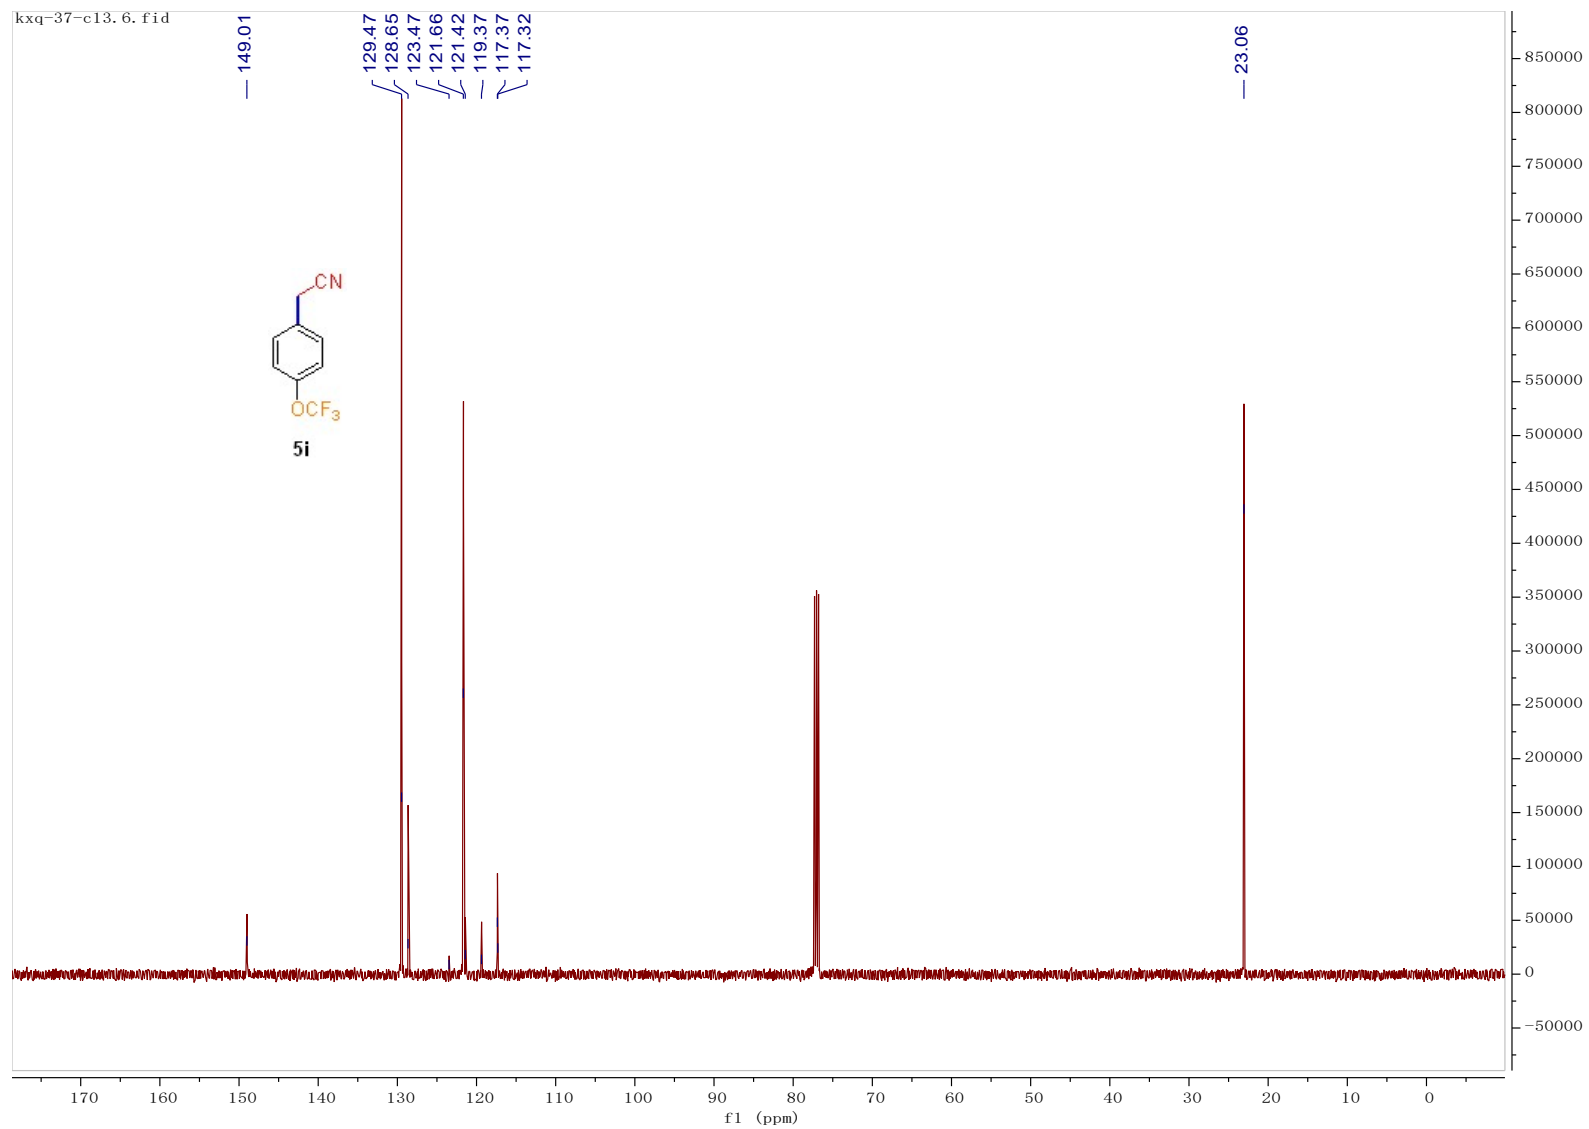

kxq-37-f19. 7. fid

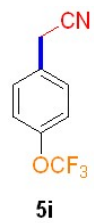

— -57.99

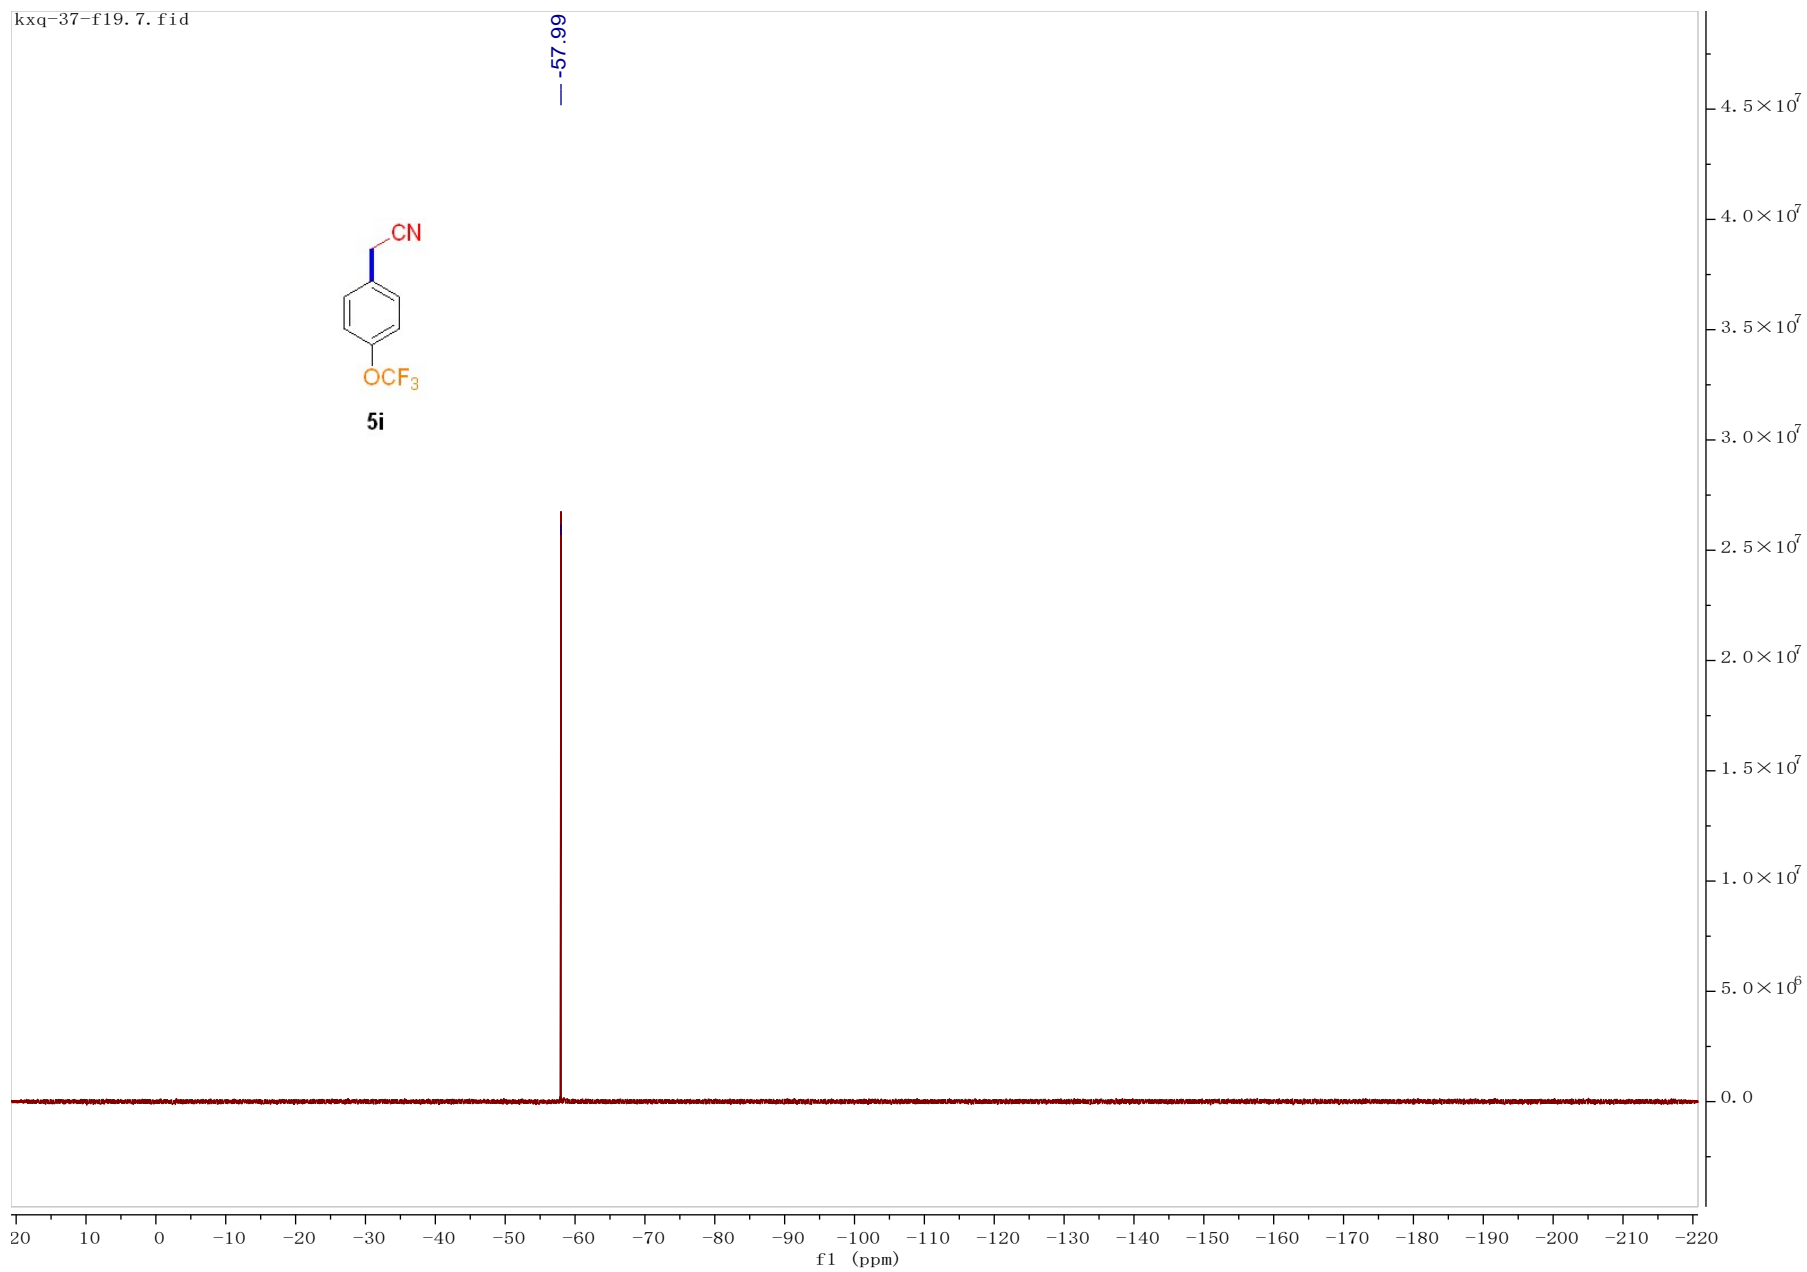

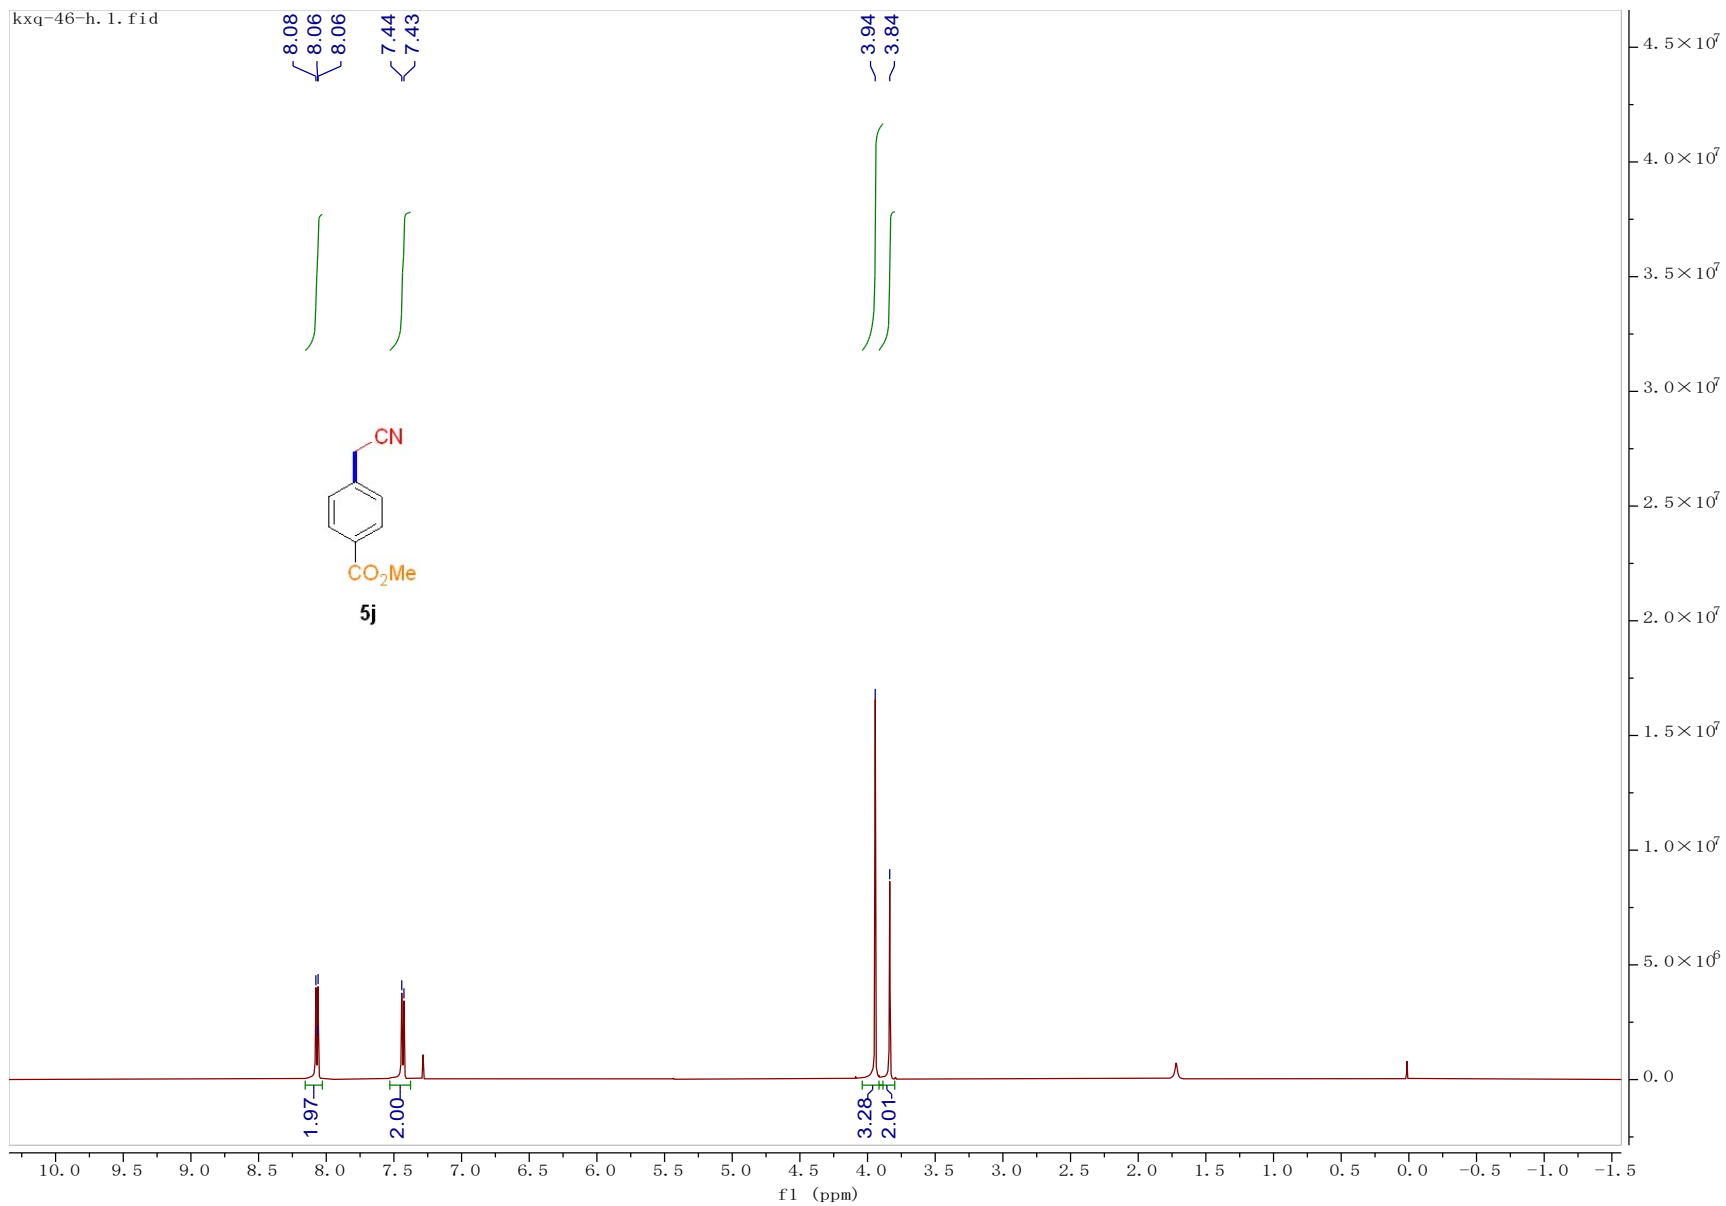

kxq-46-c13. 2. fid

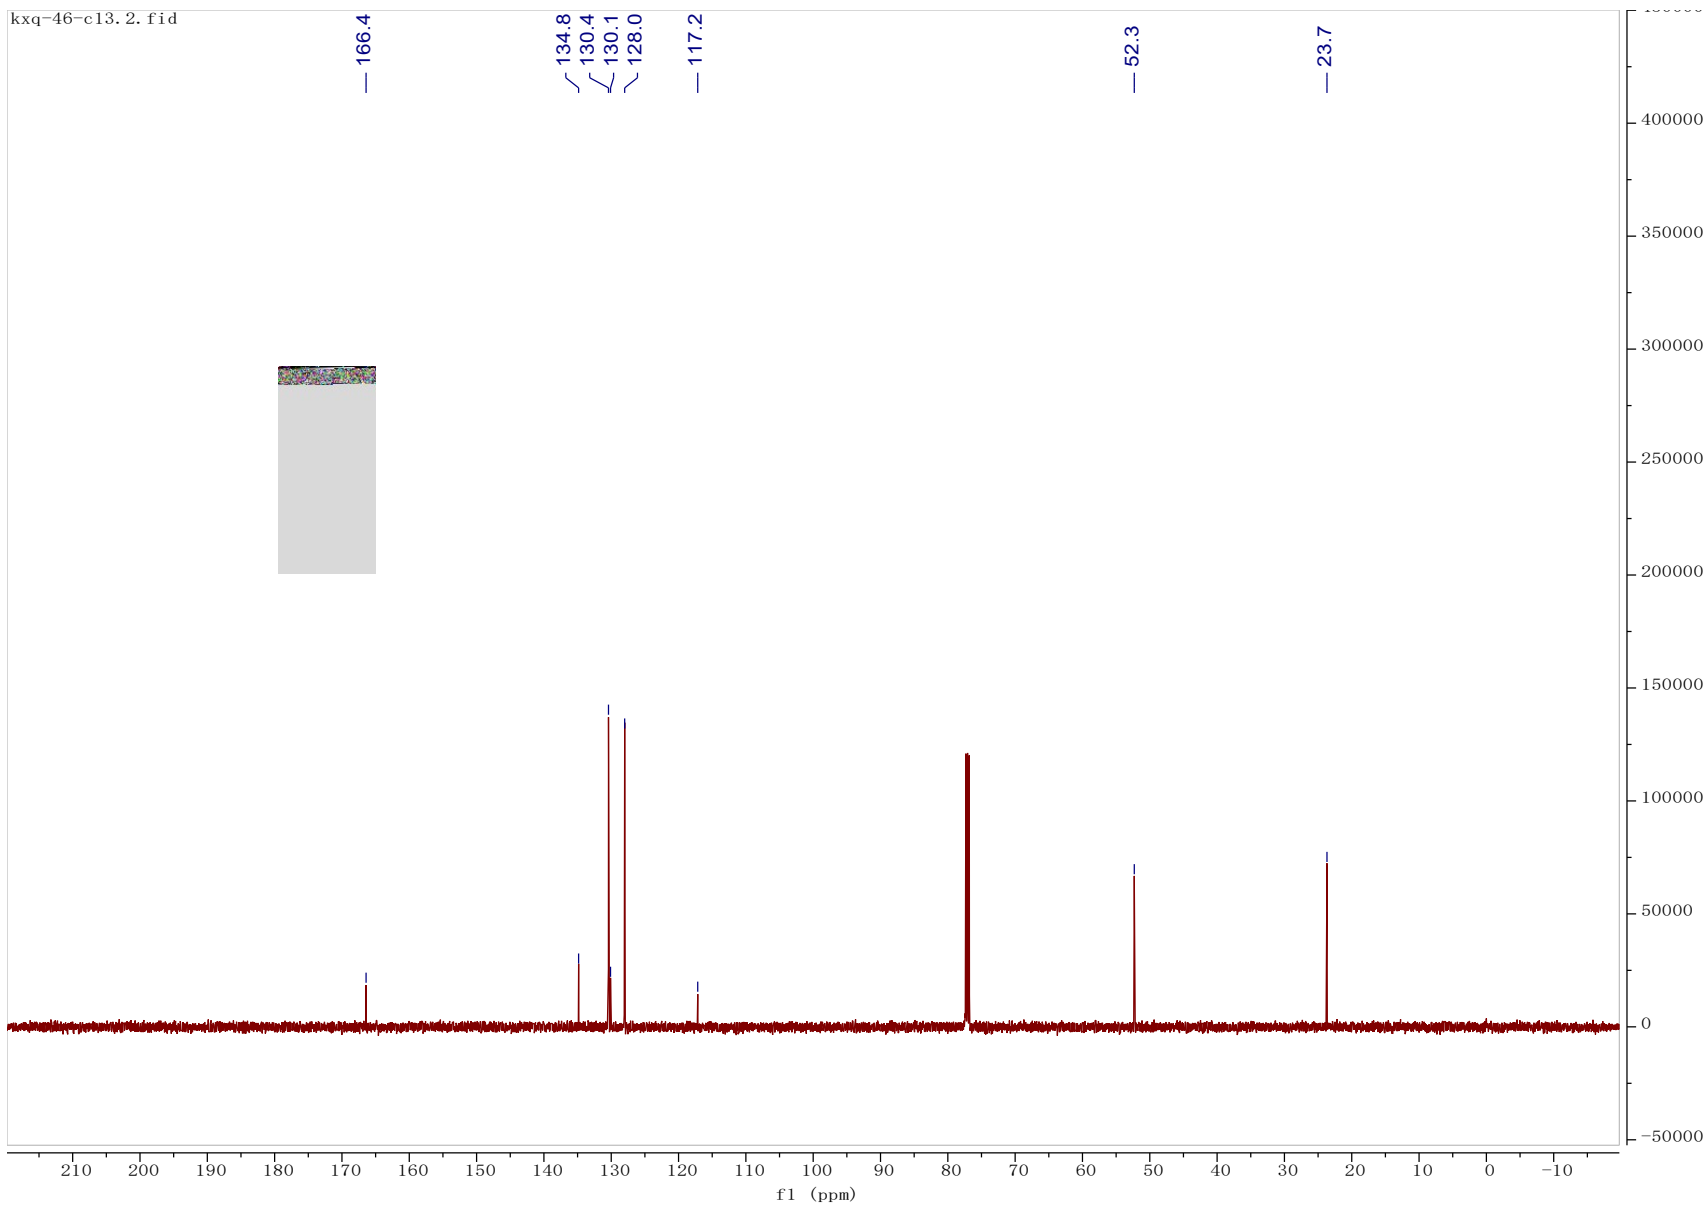

kxq-39-h. 10. fid

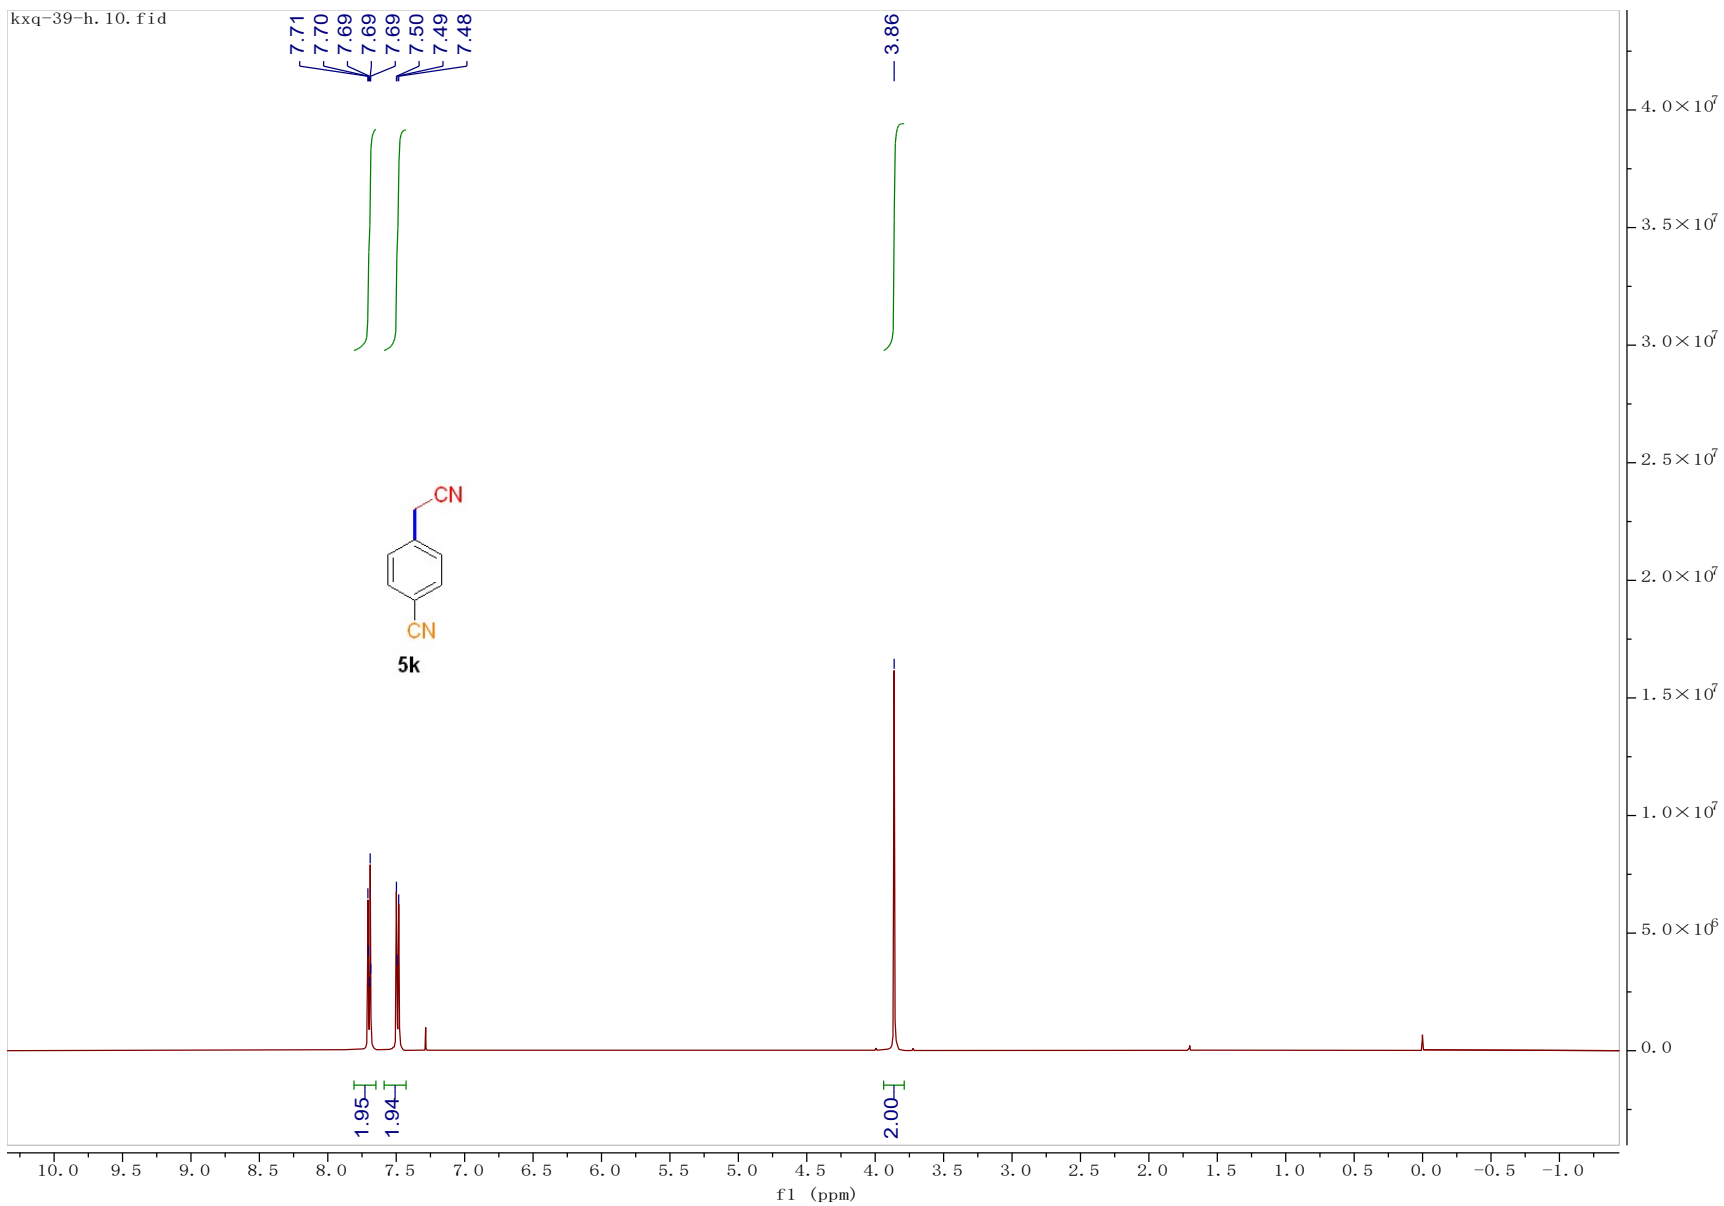



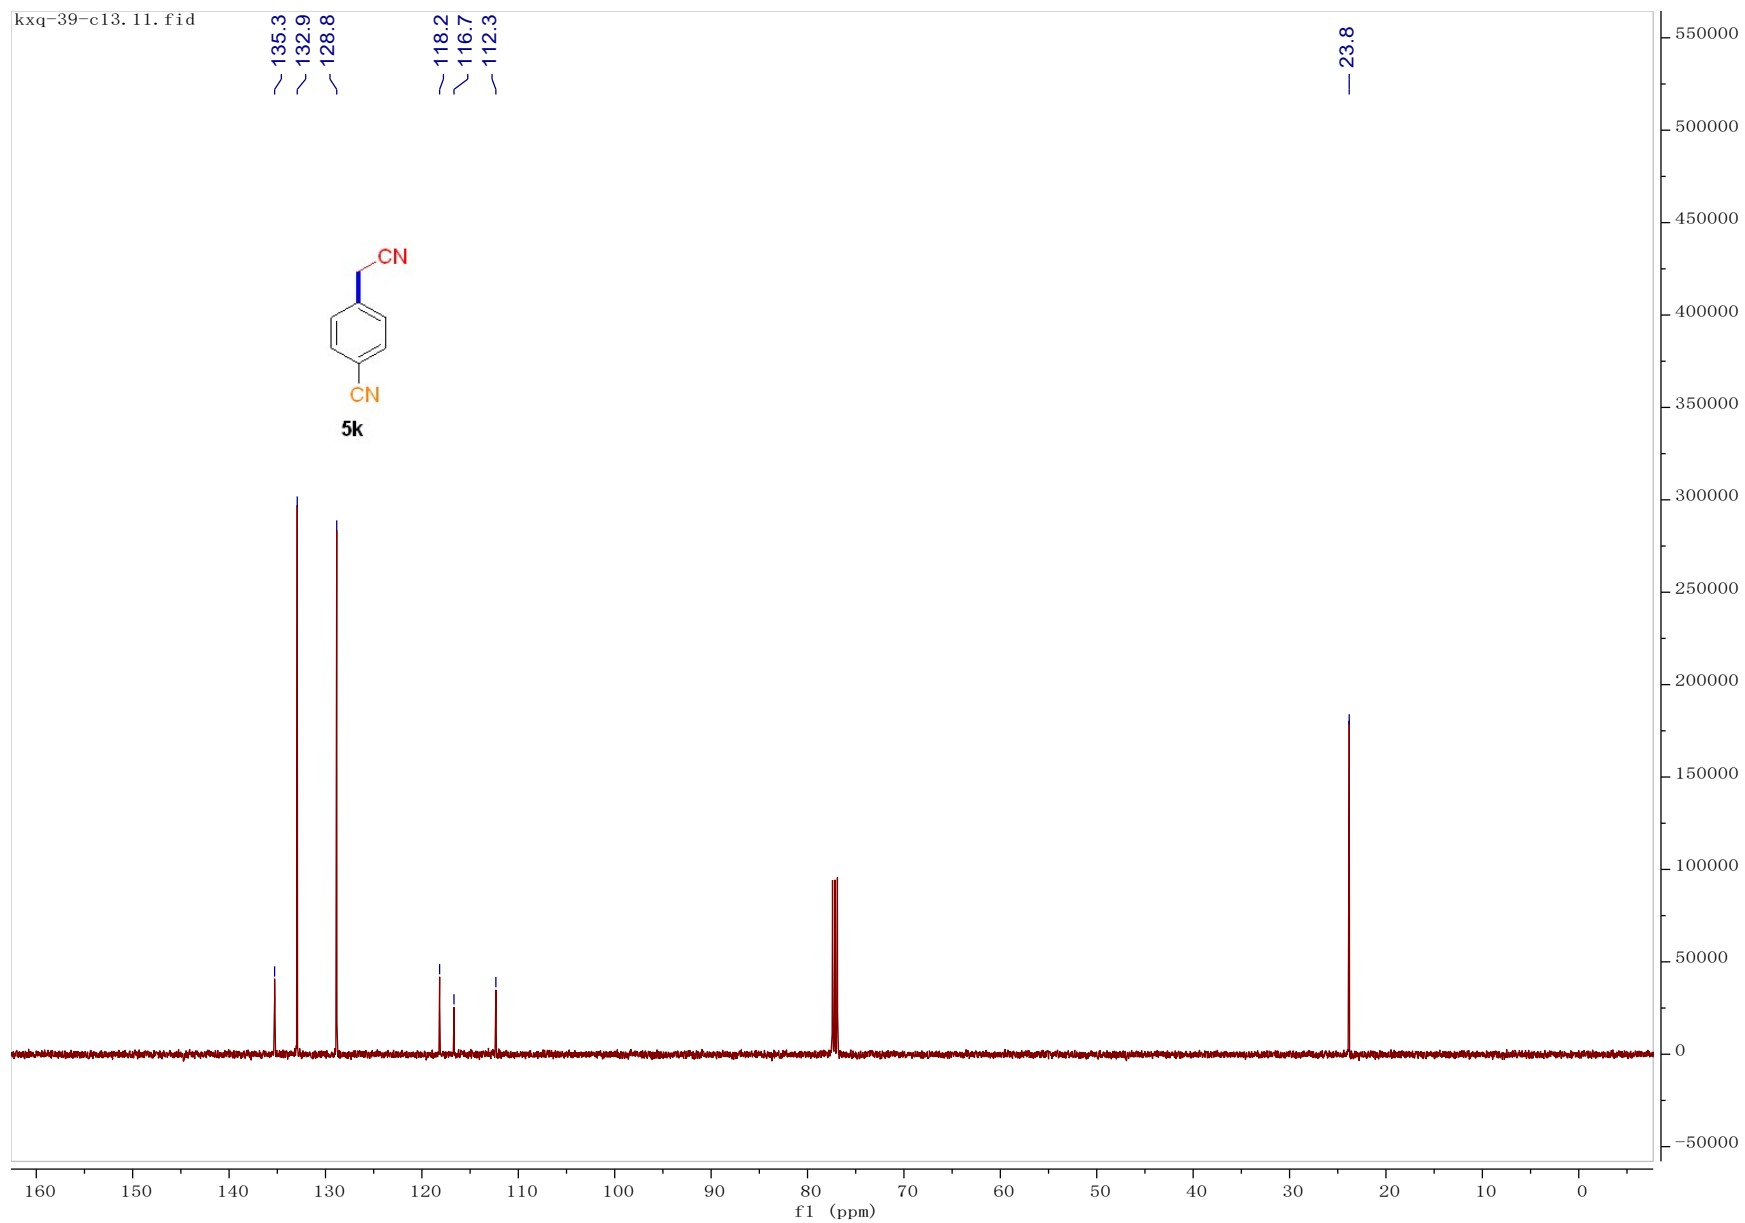

kxq-42-h. 17. fid

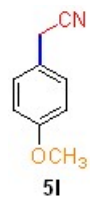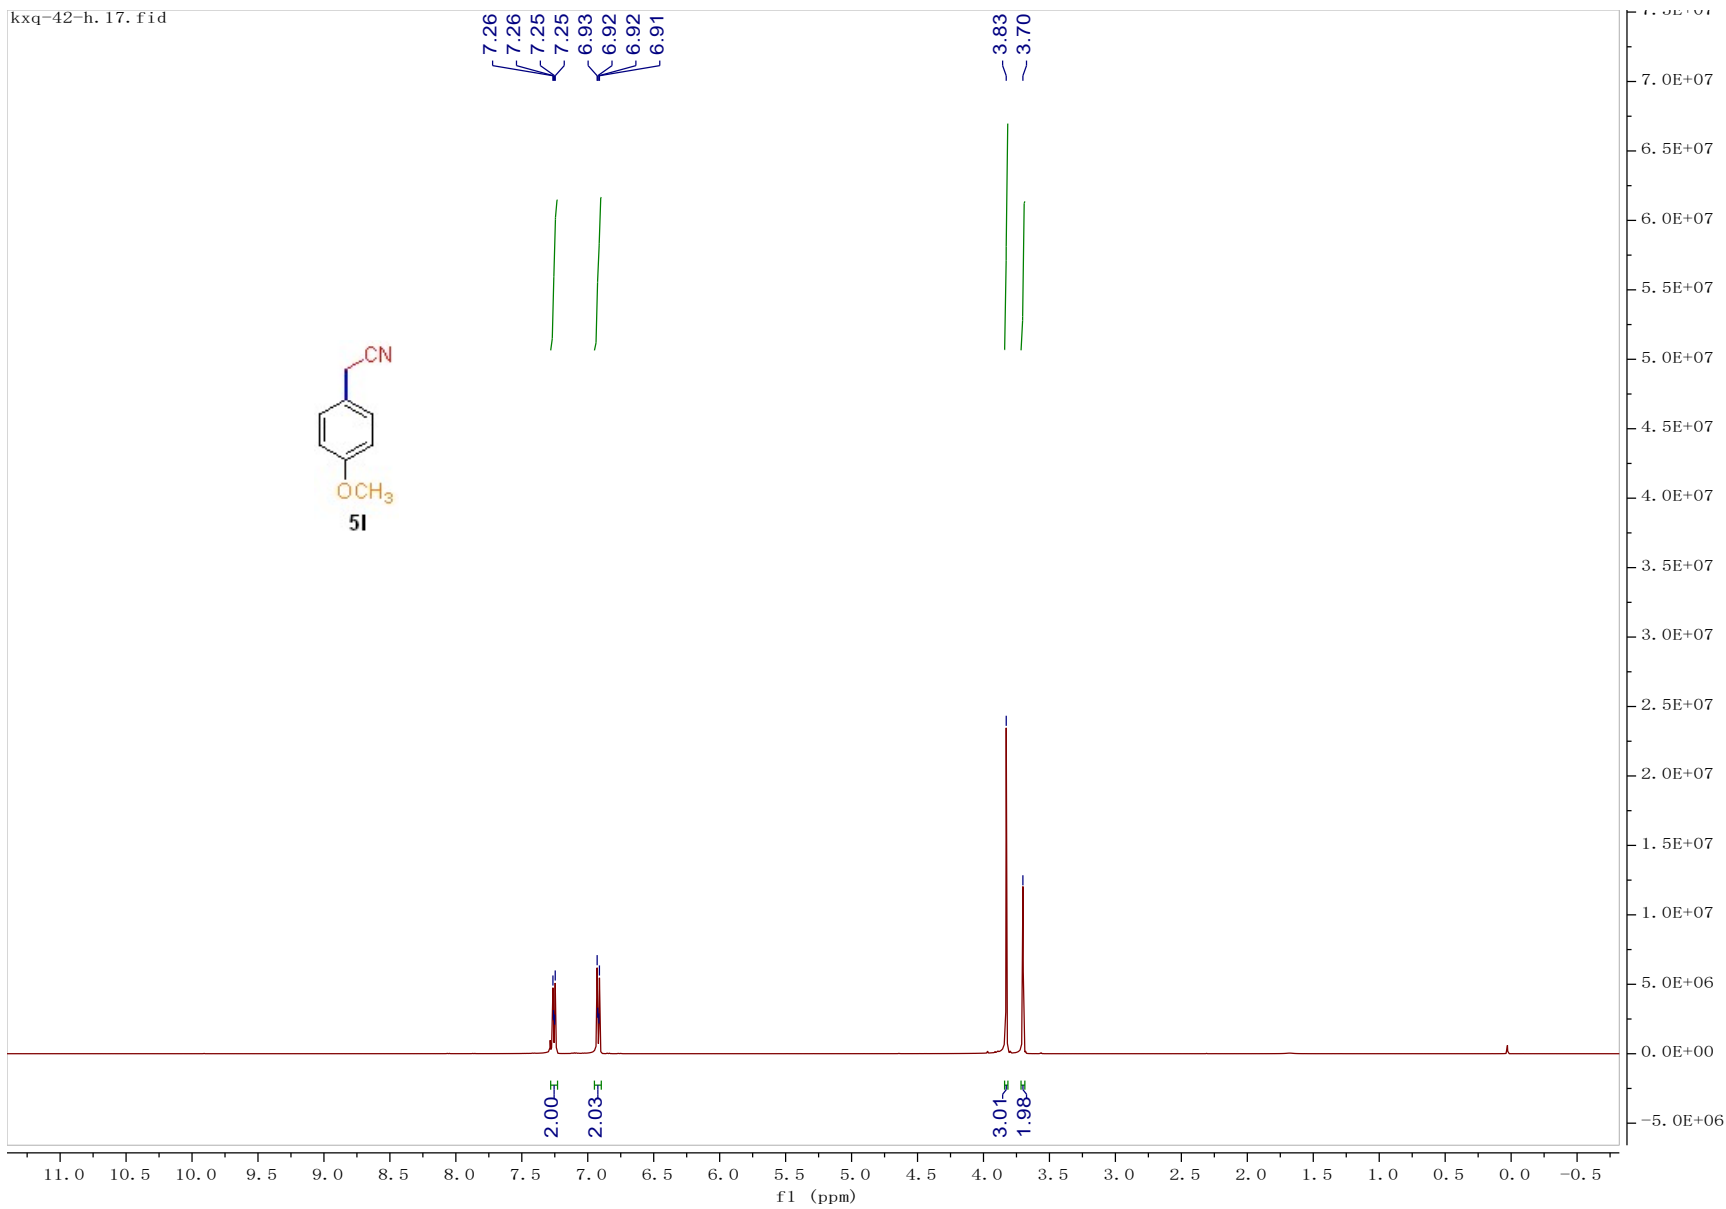

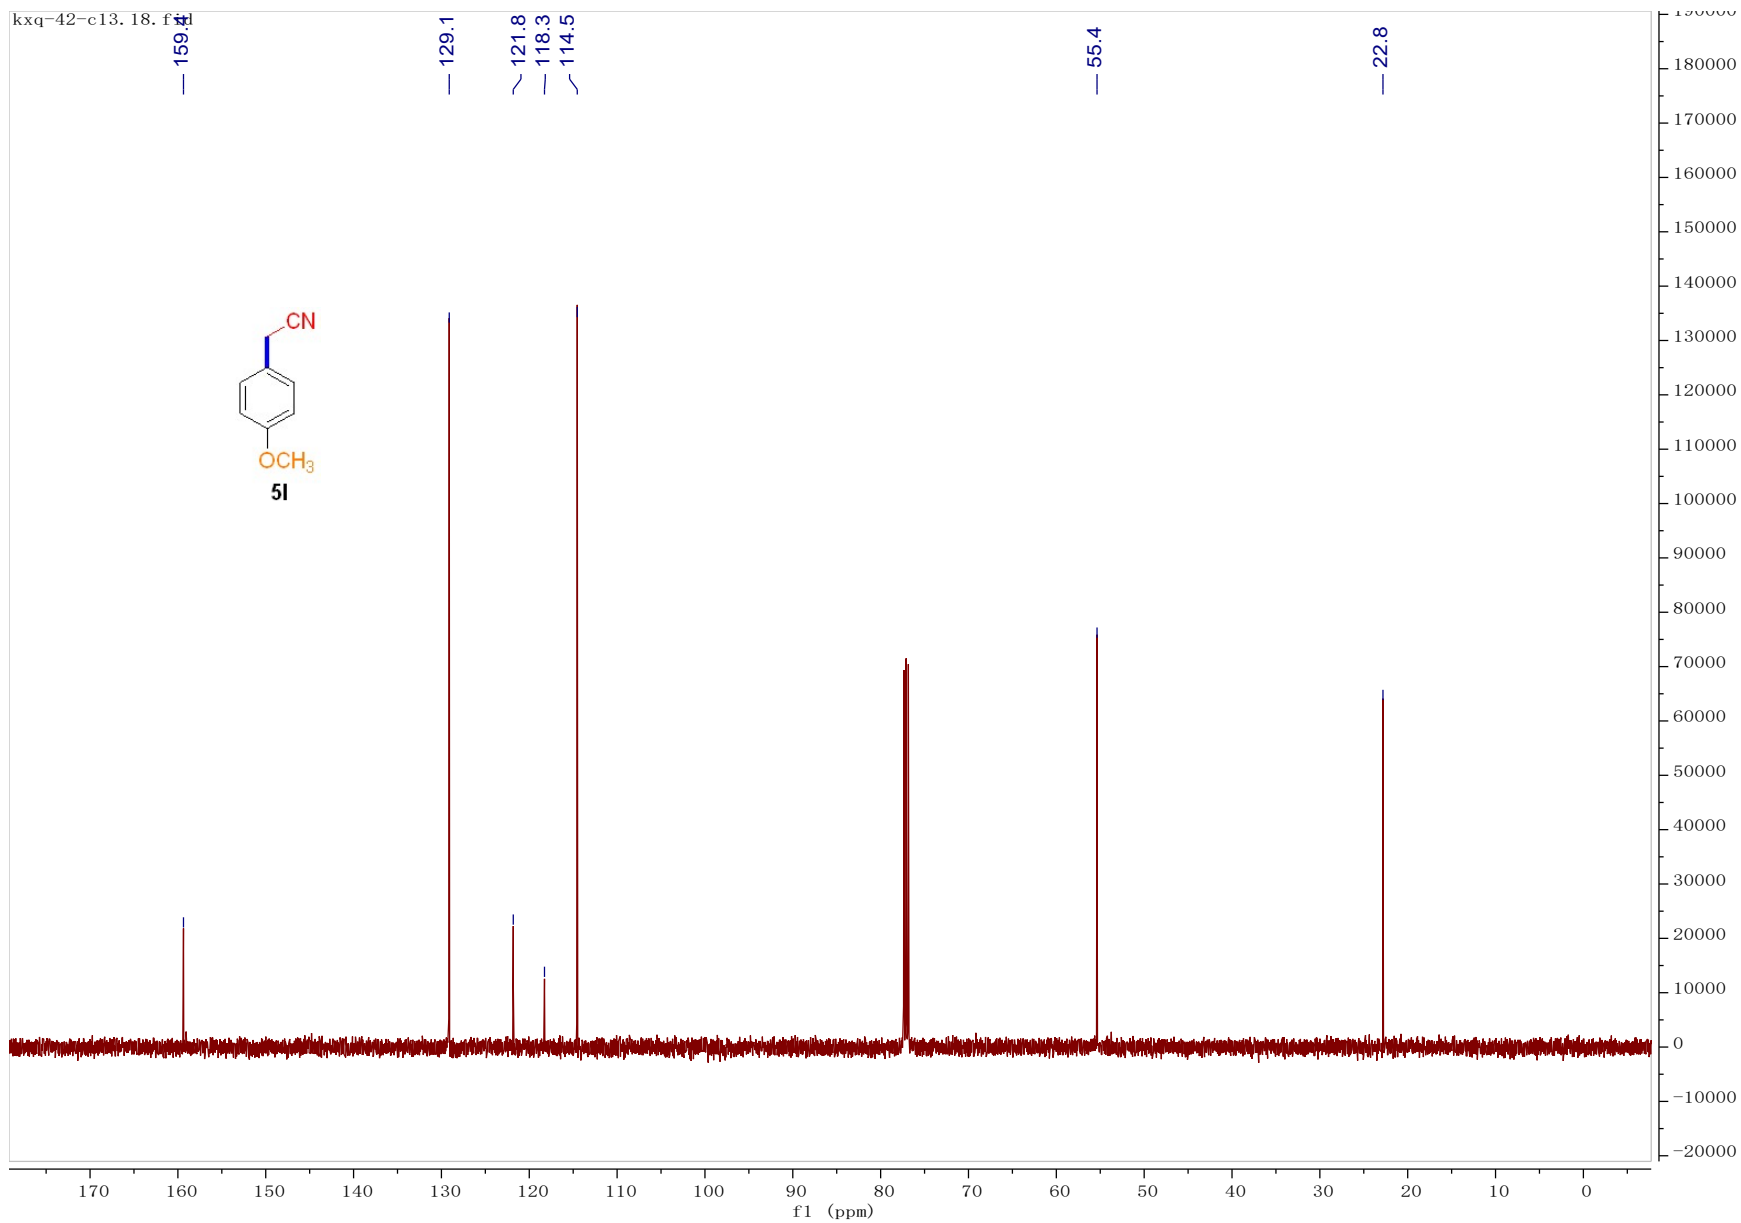

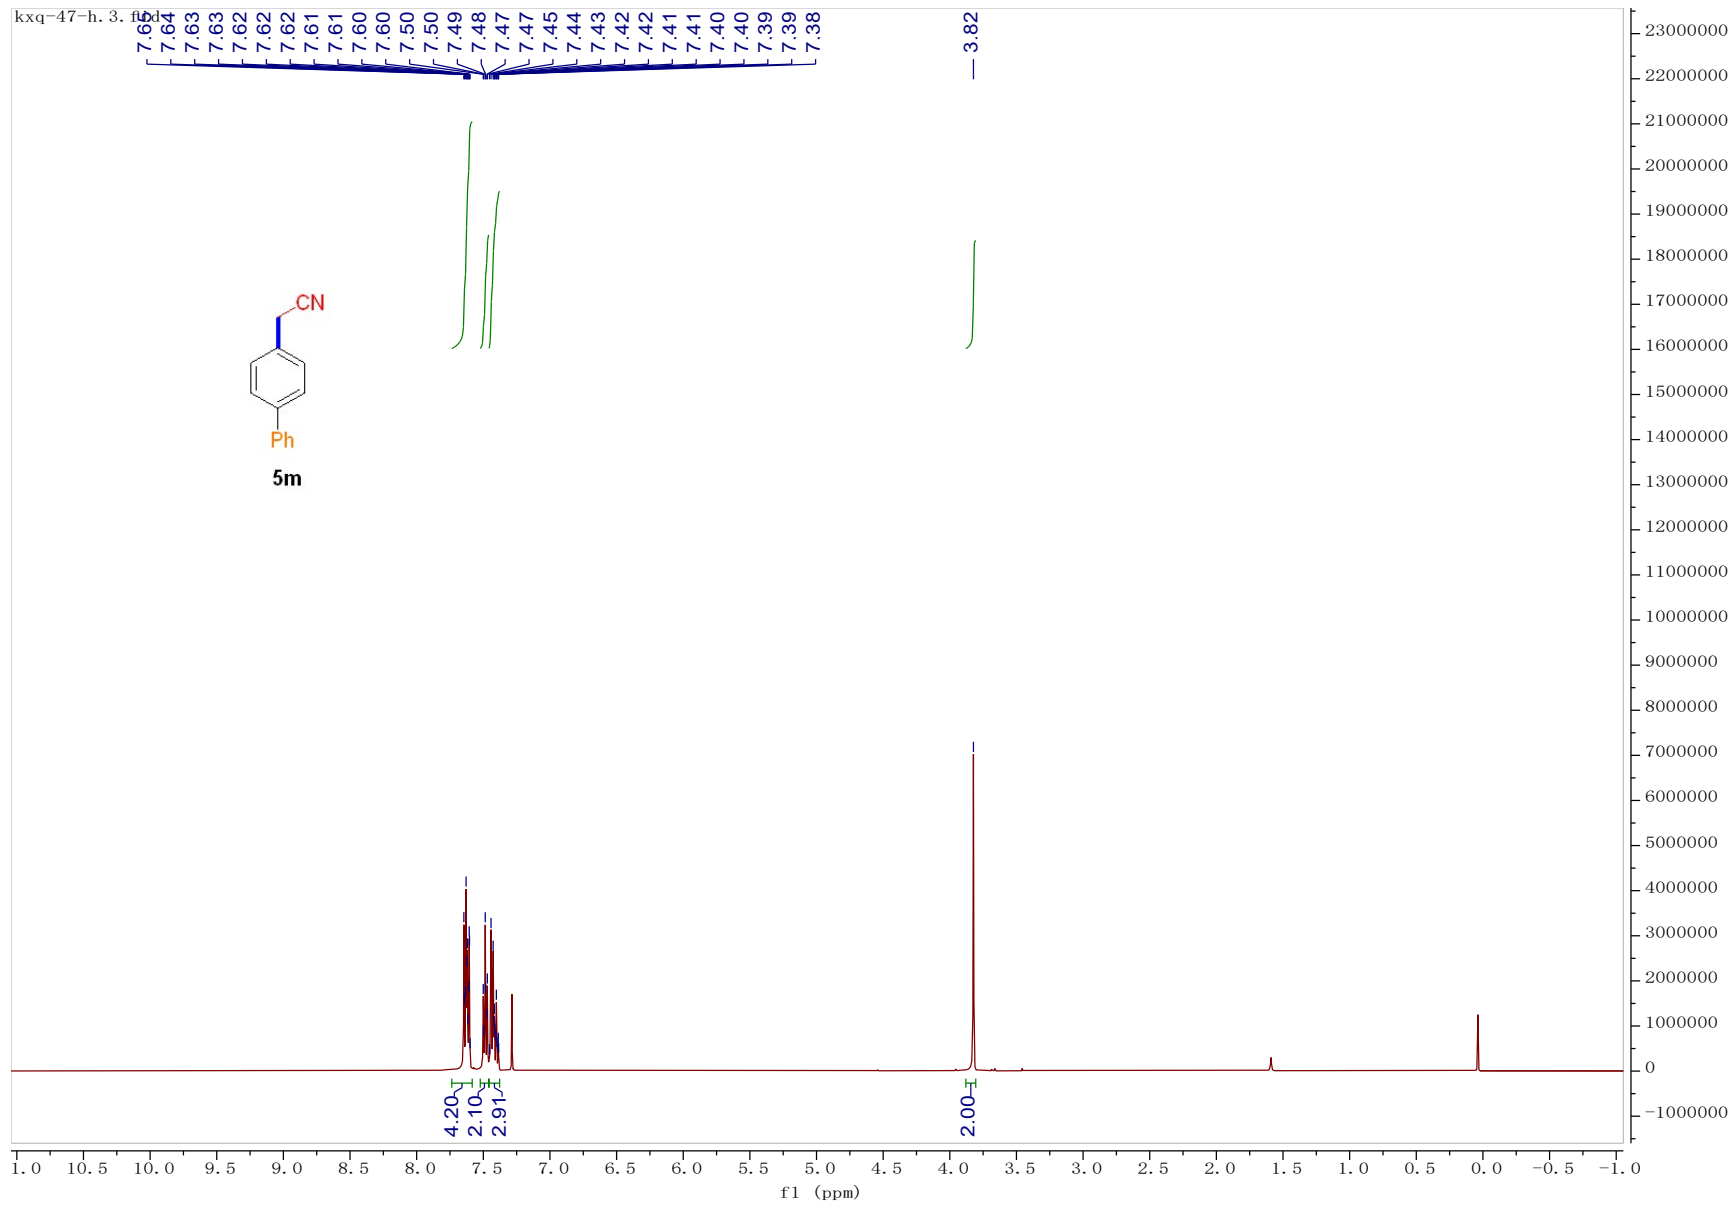

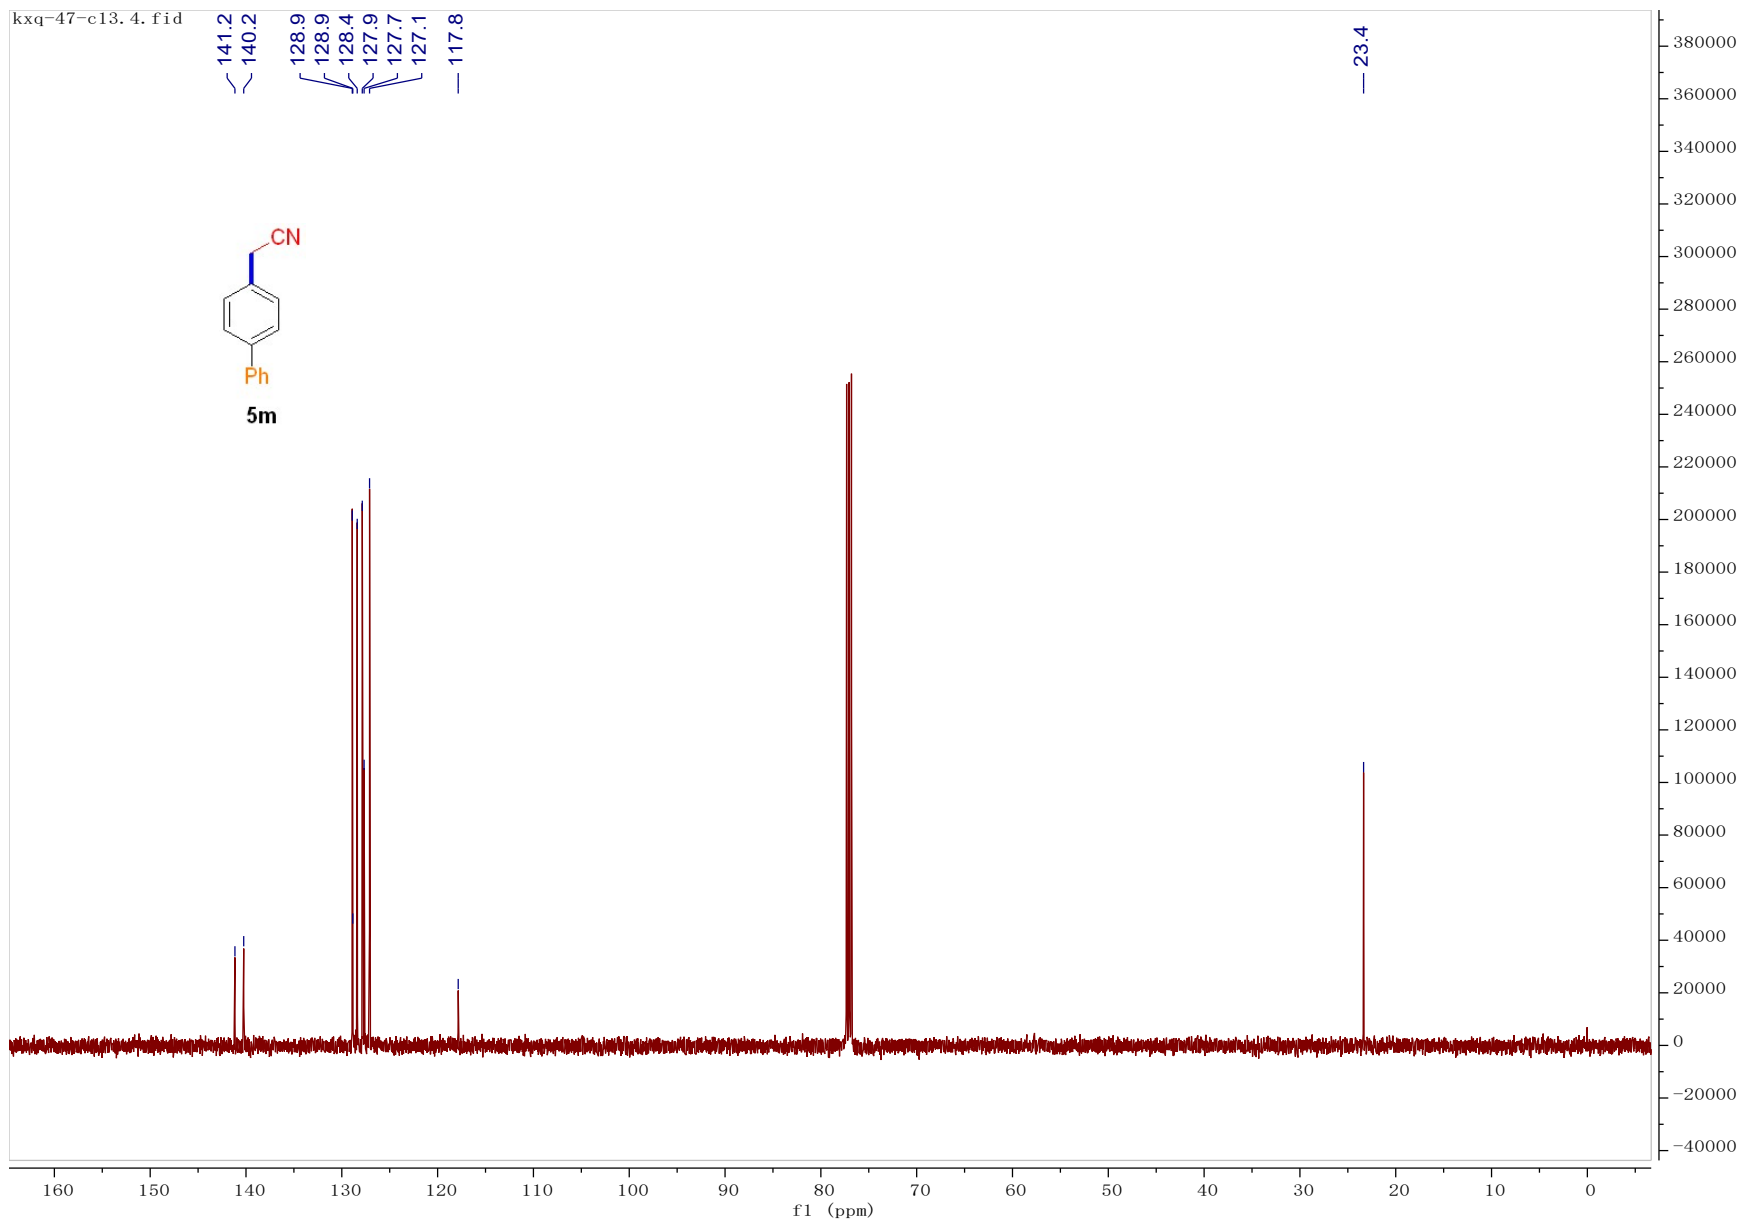

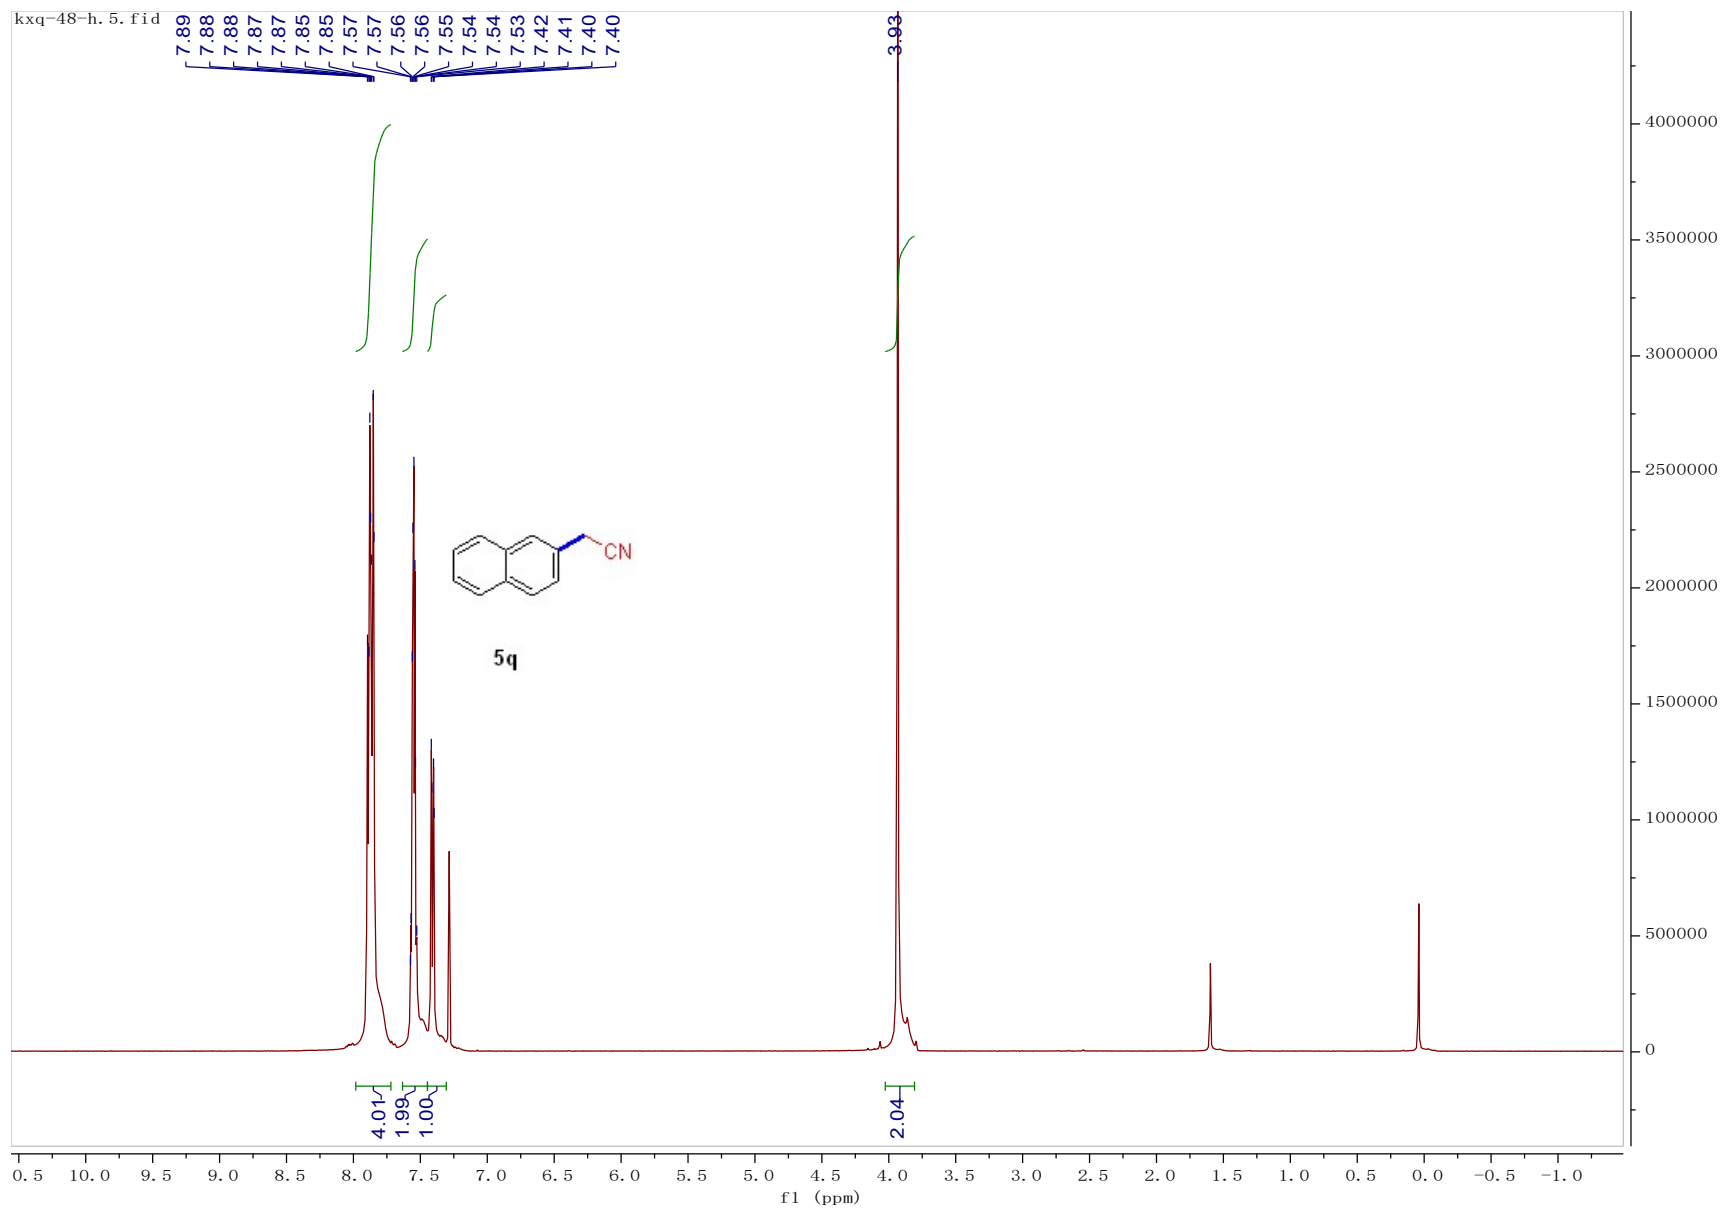

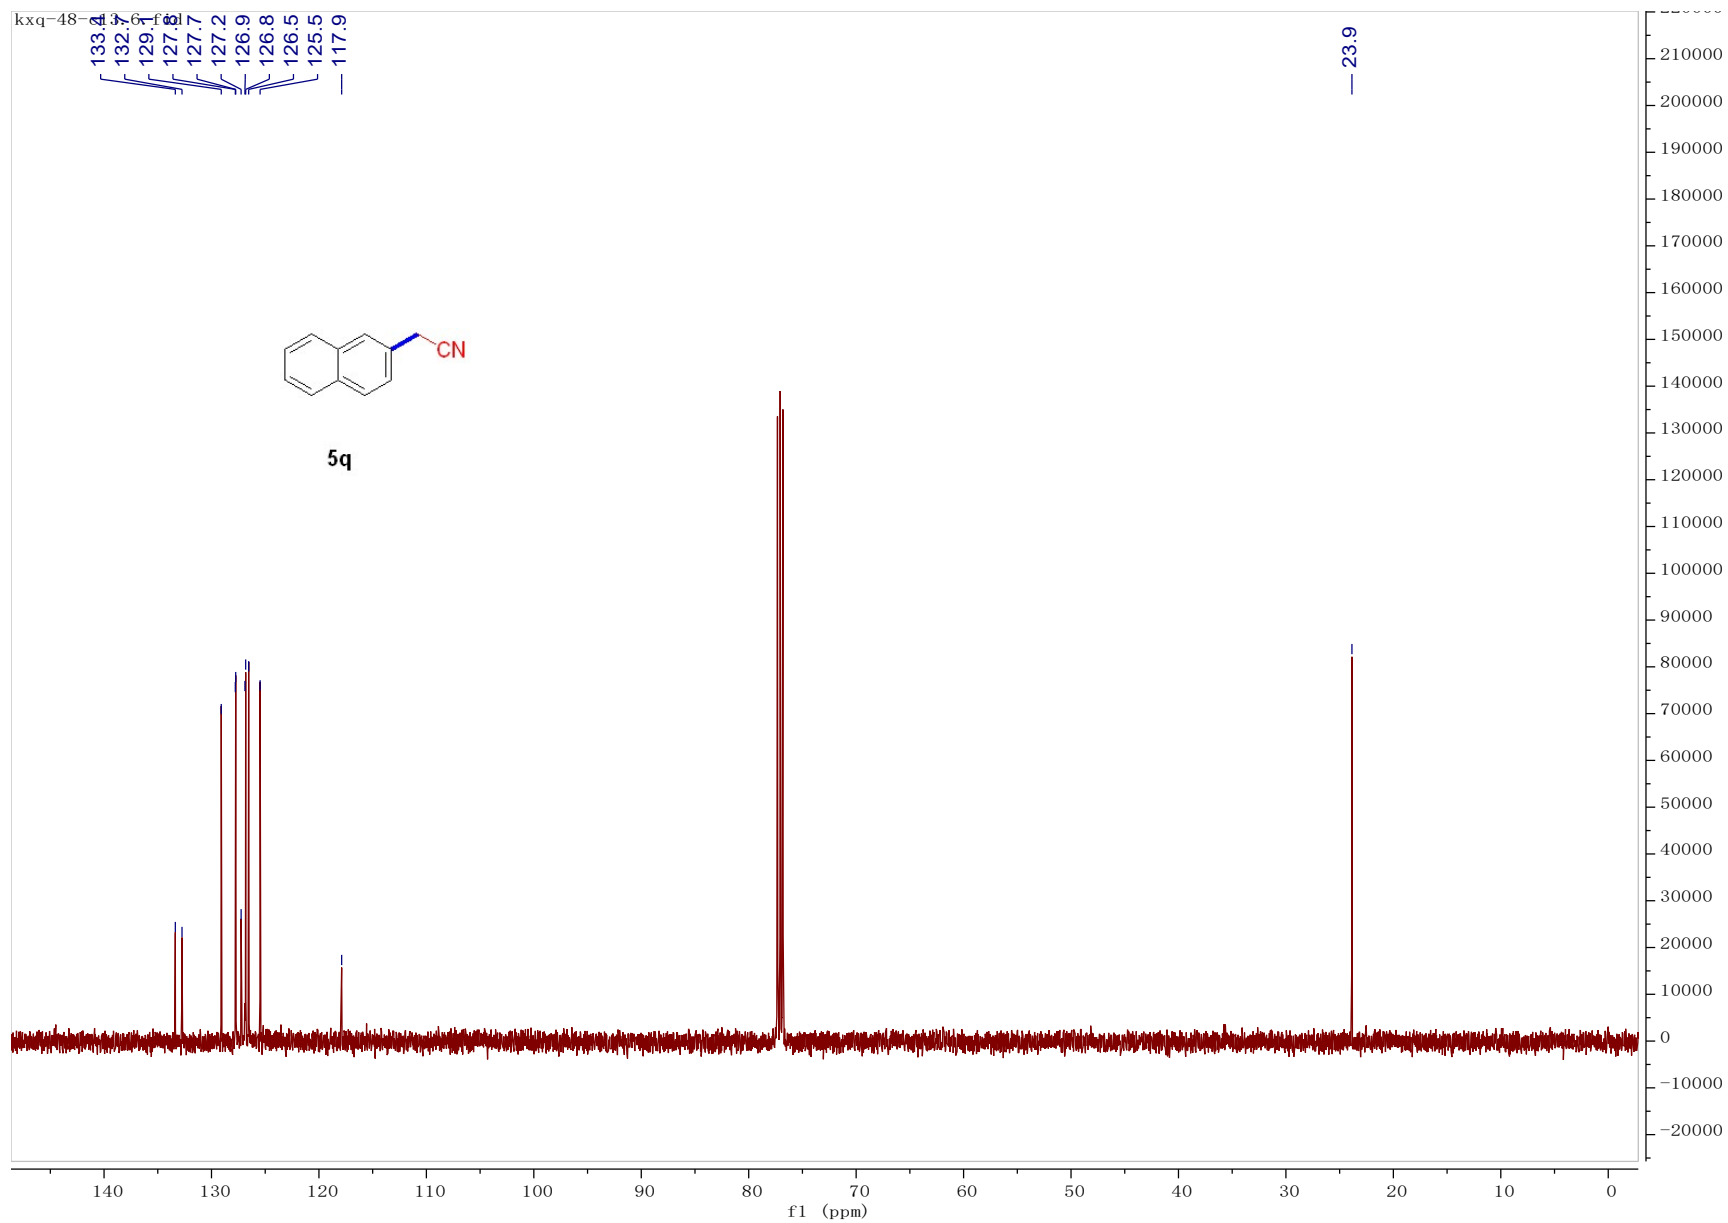

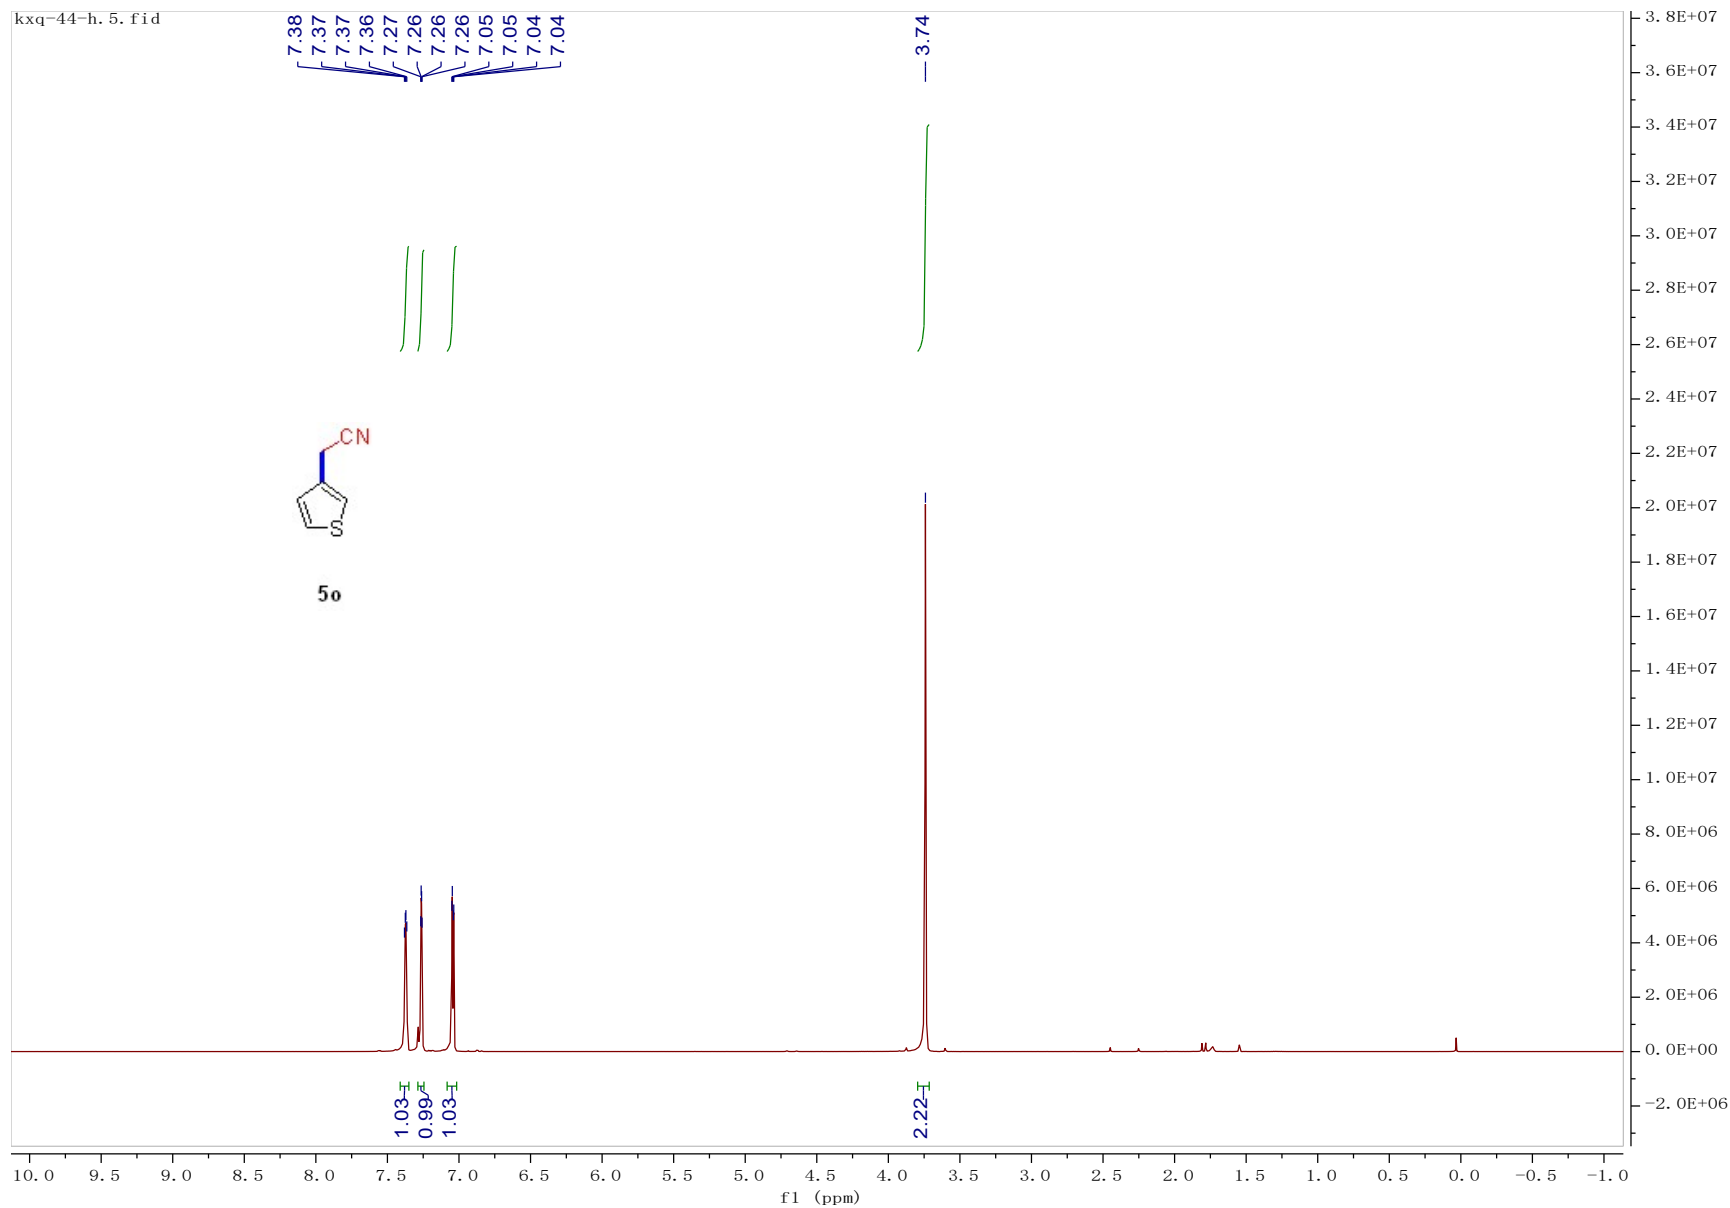



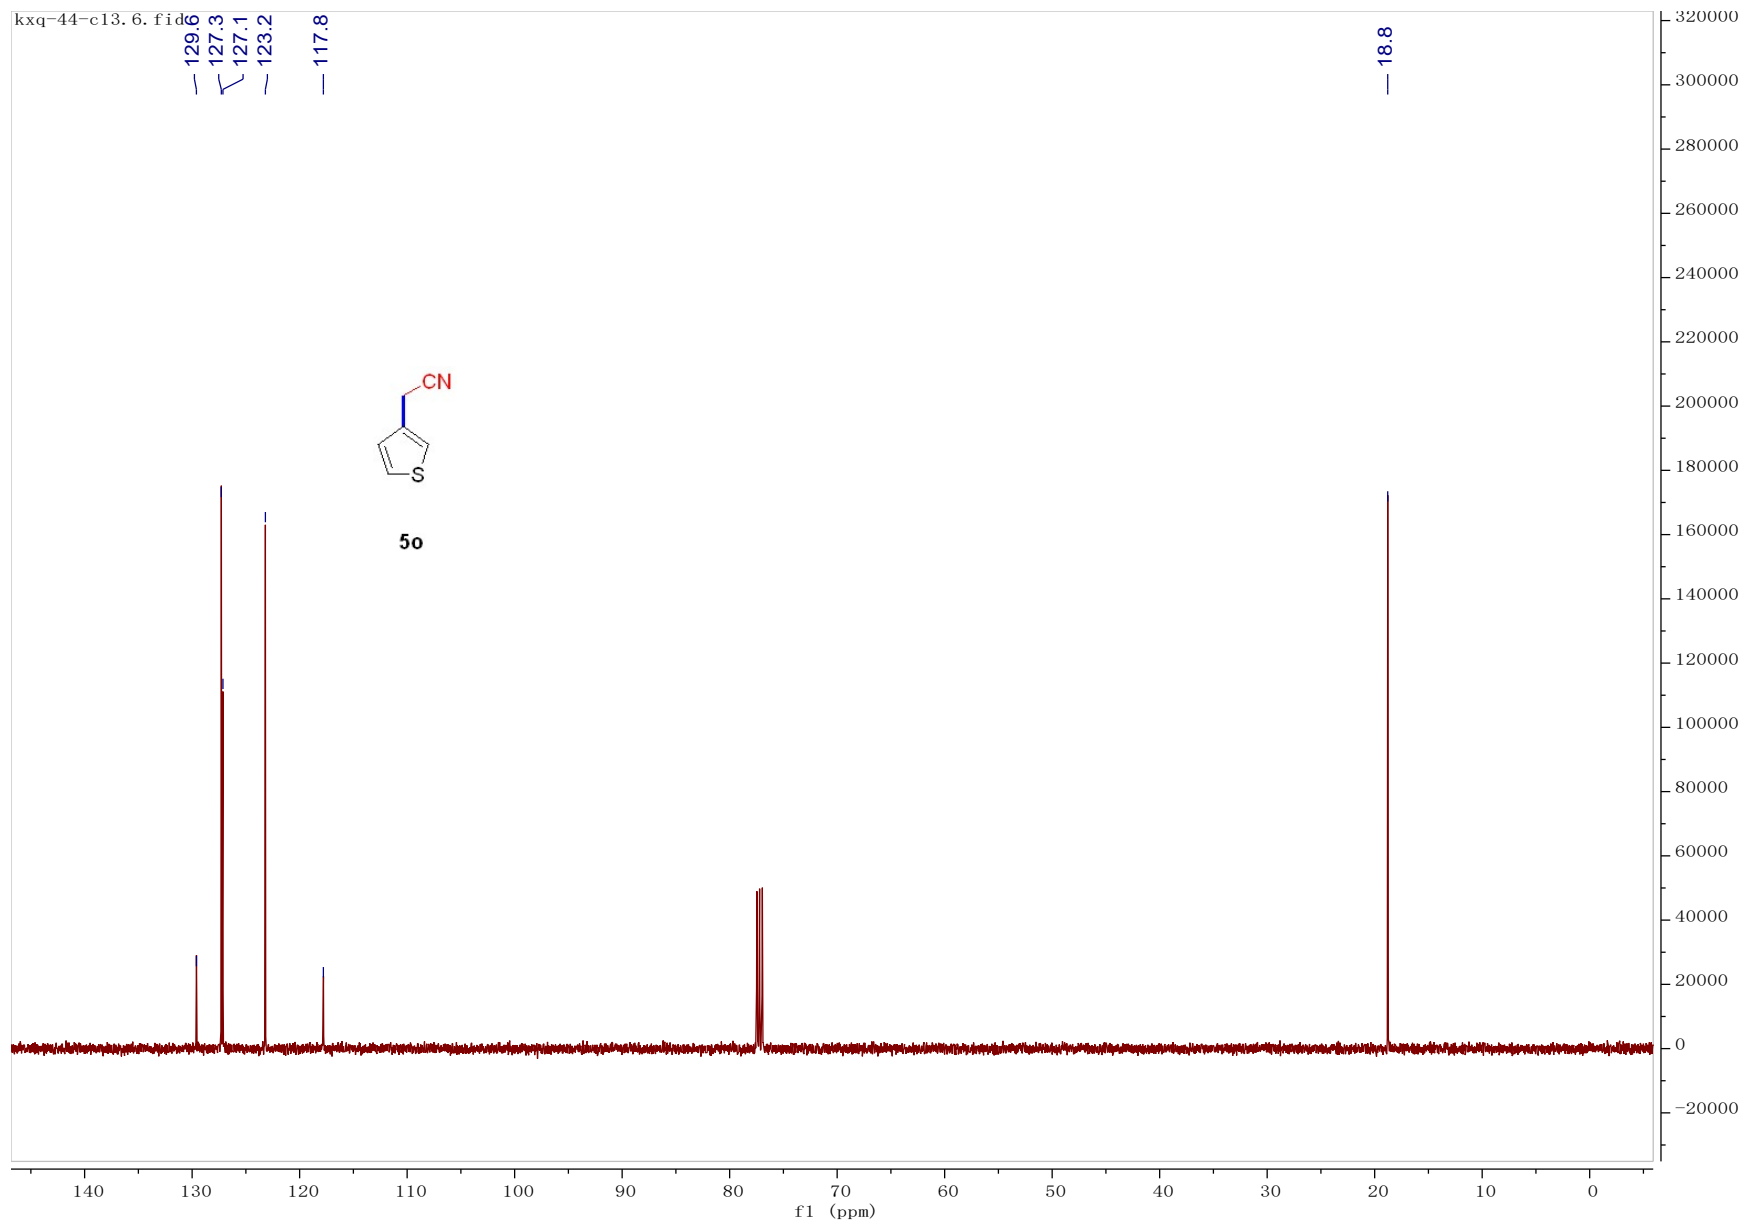

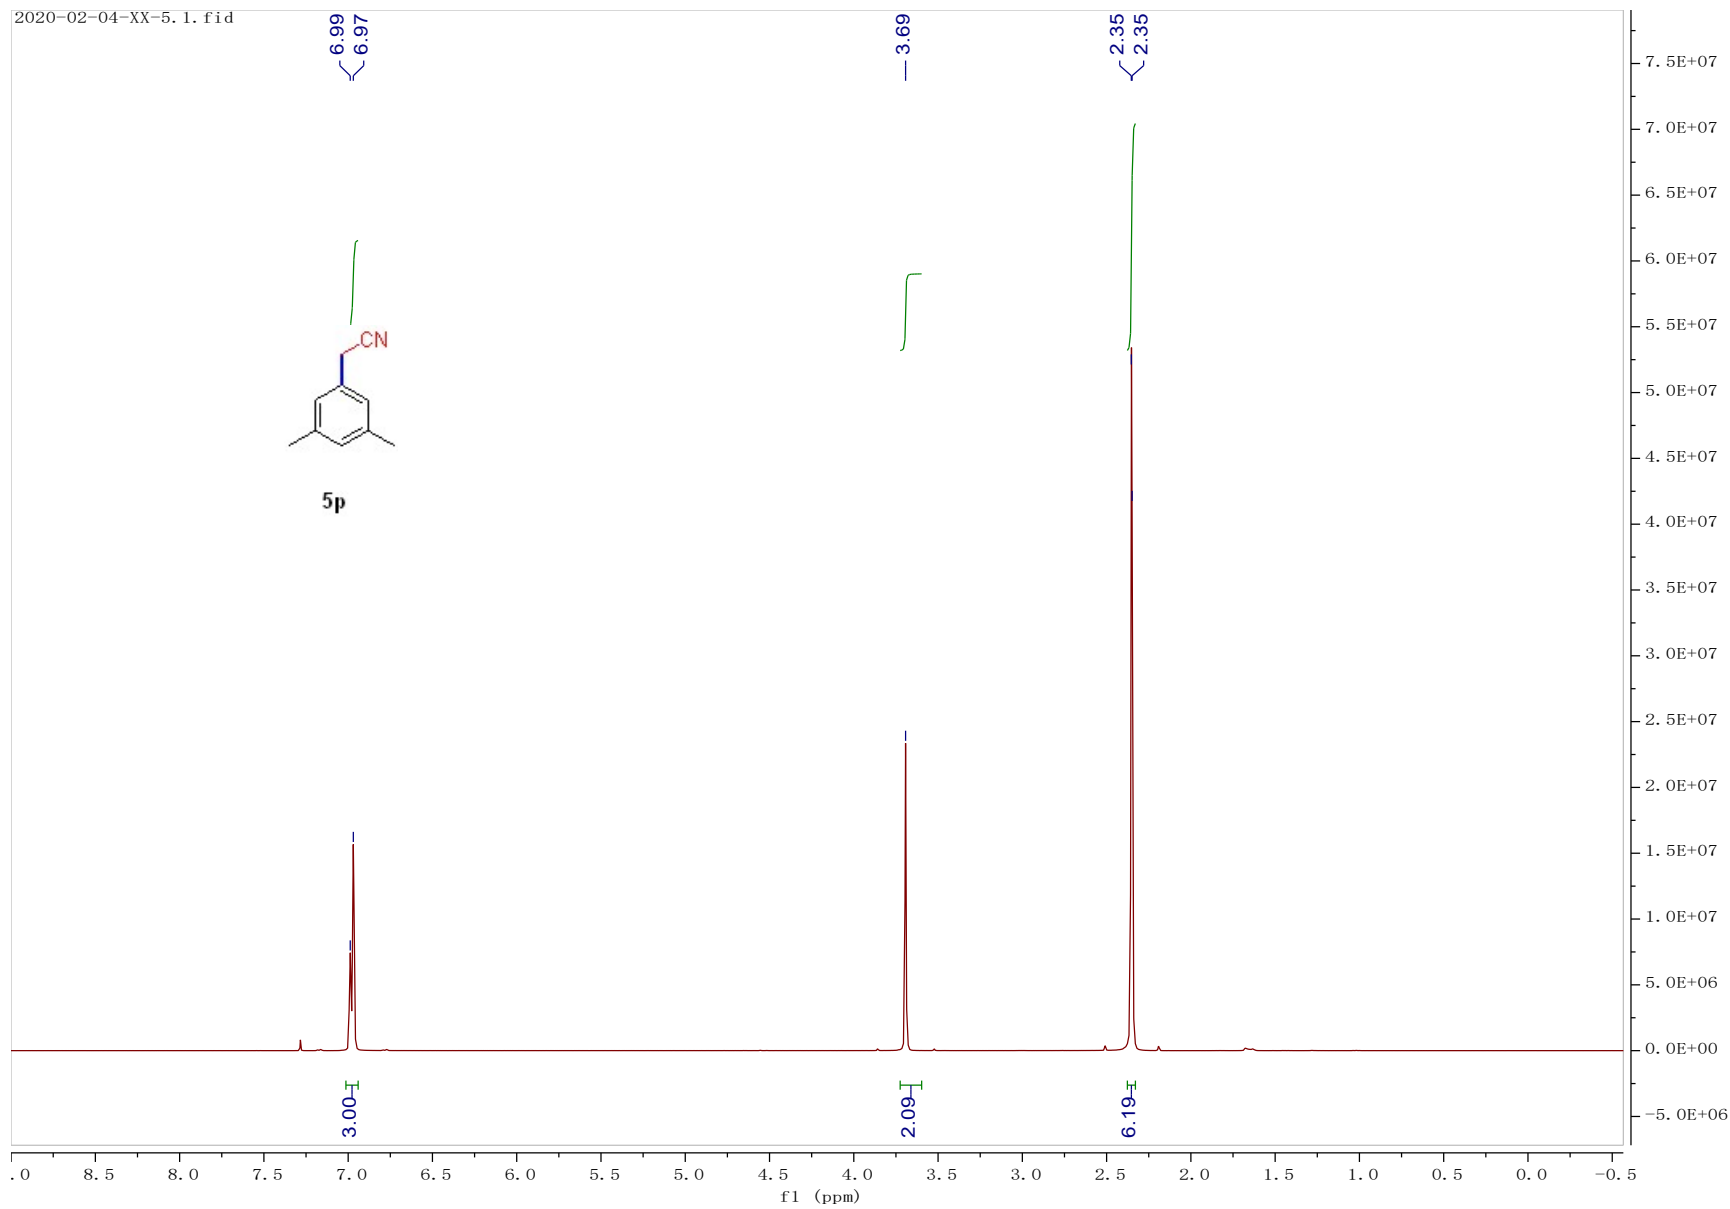

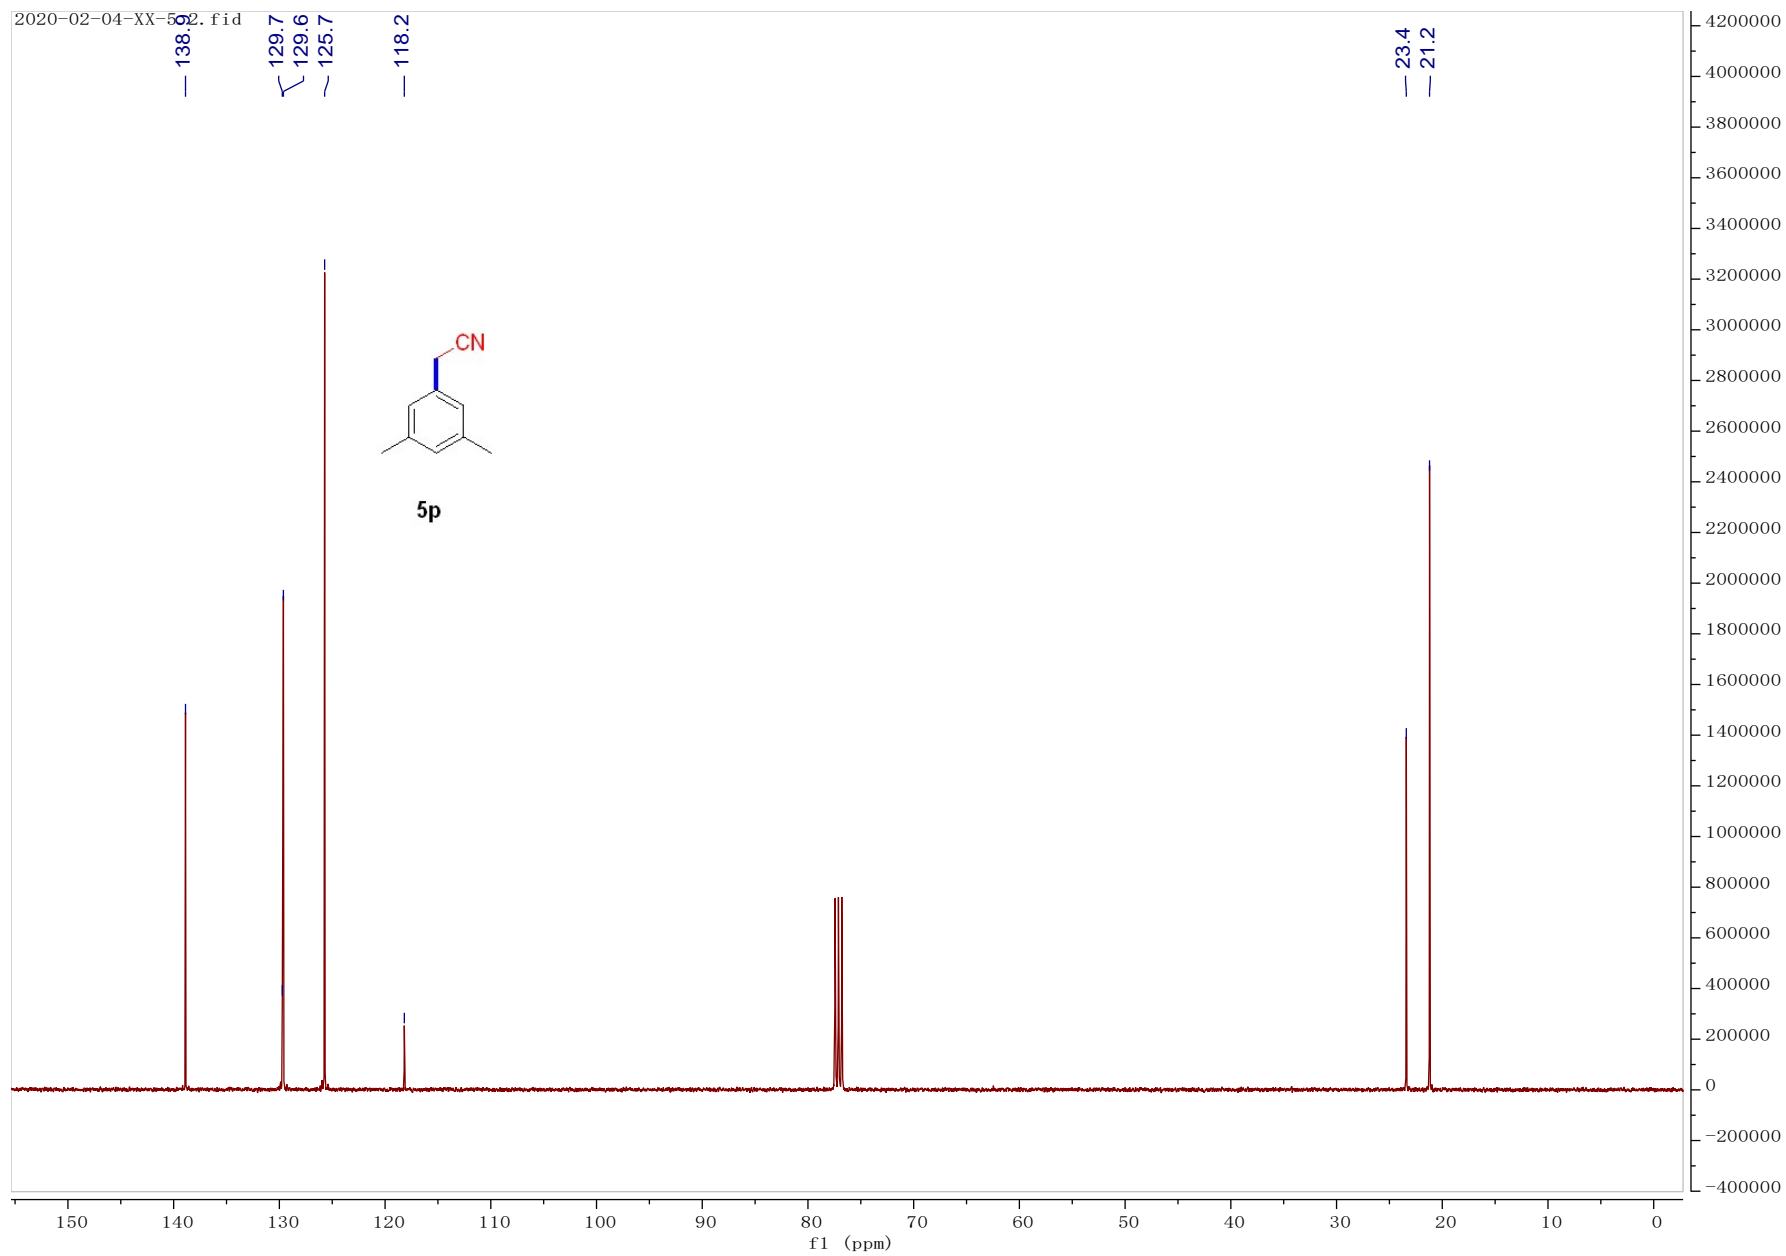

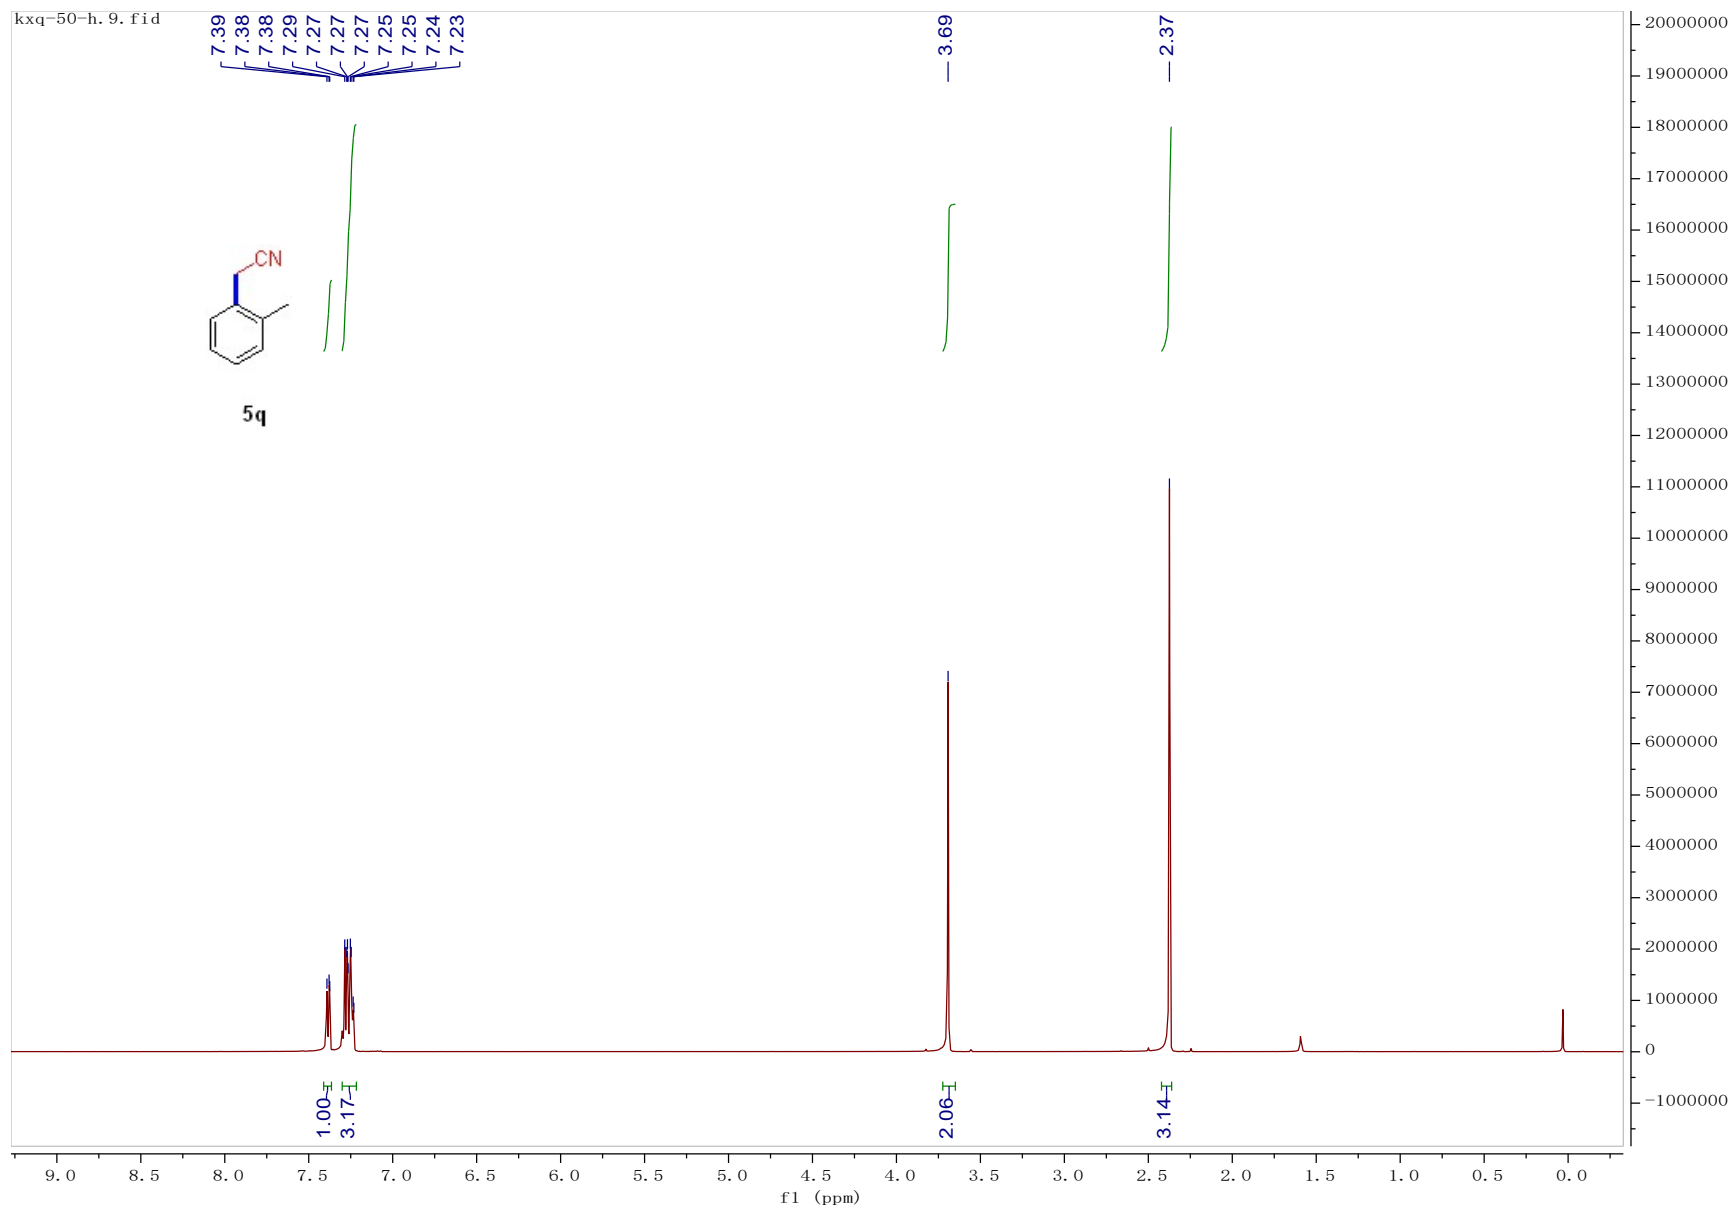

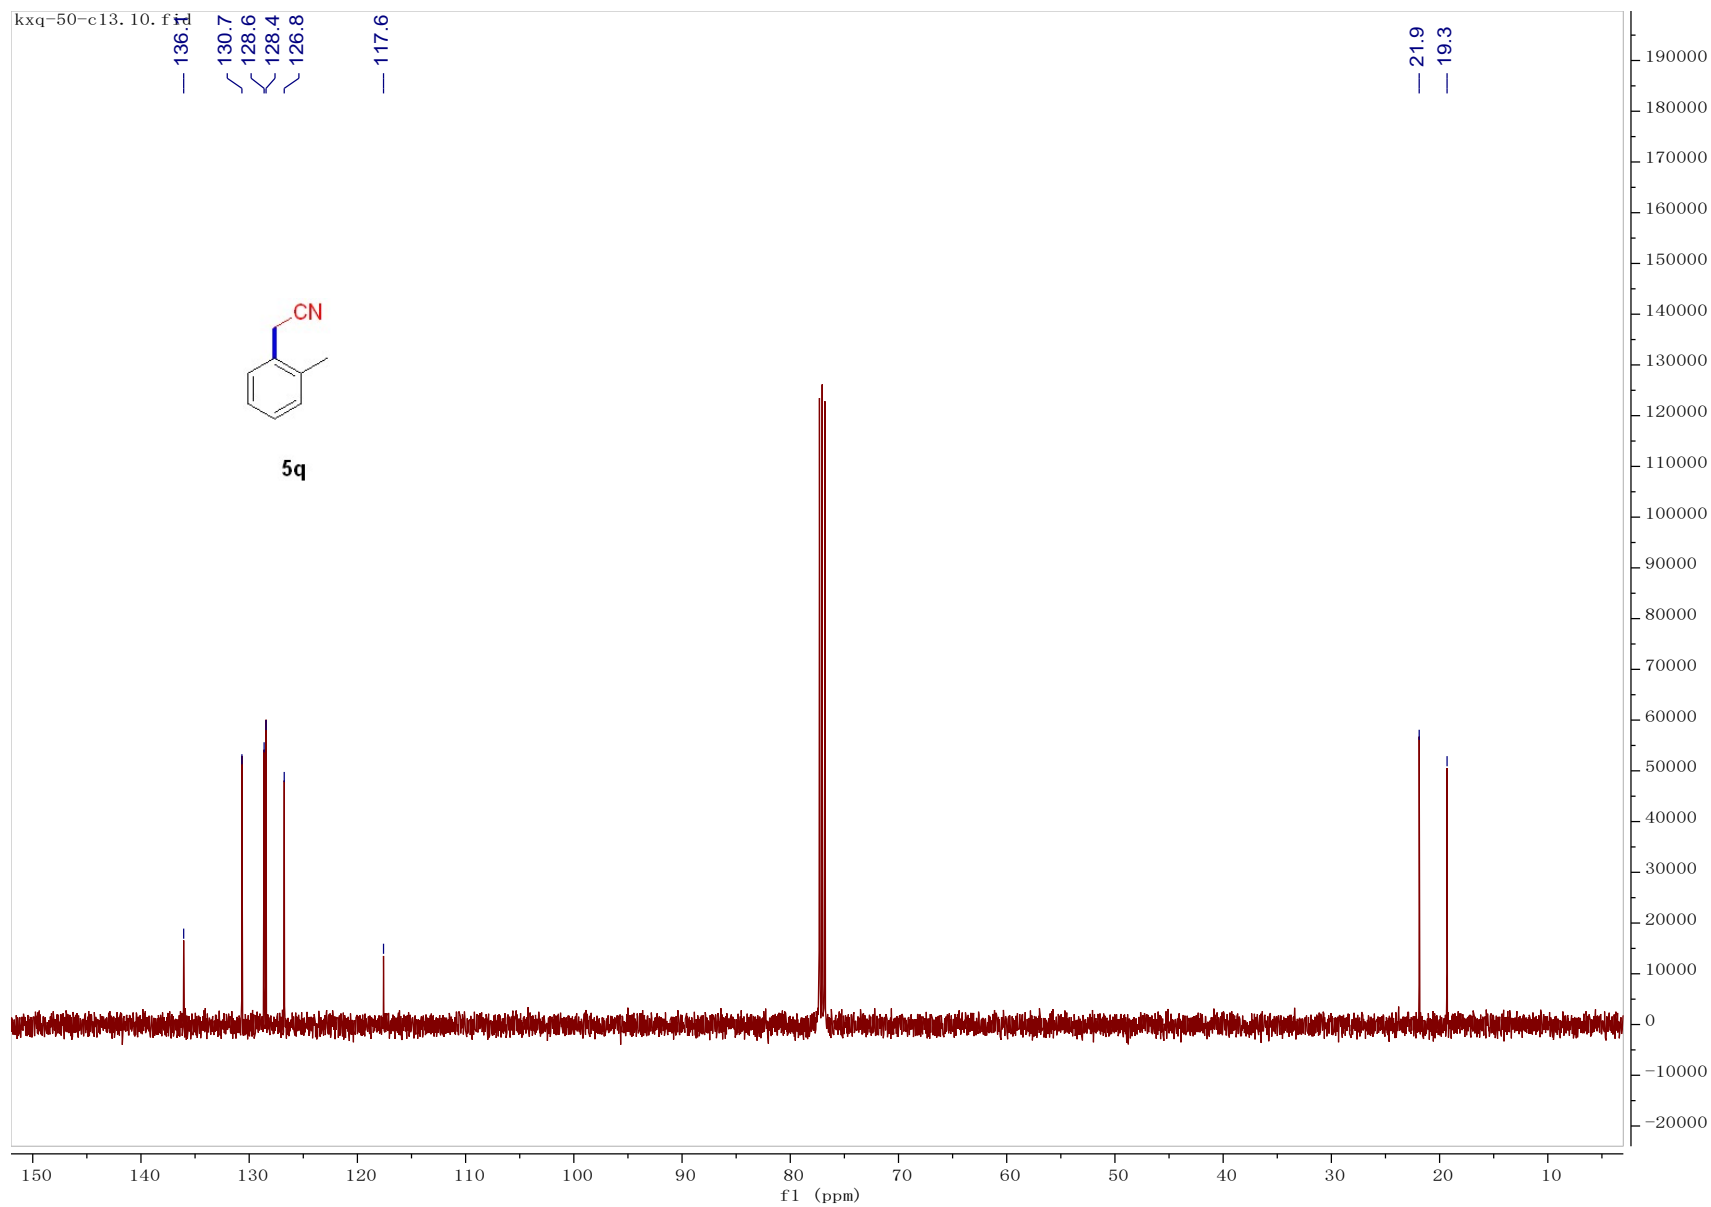

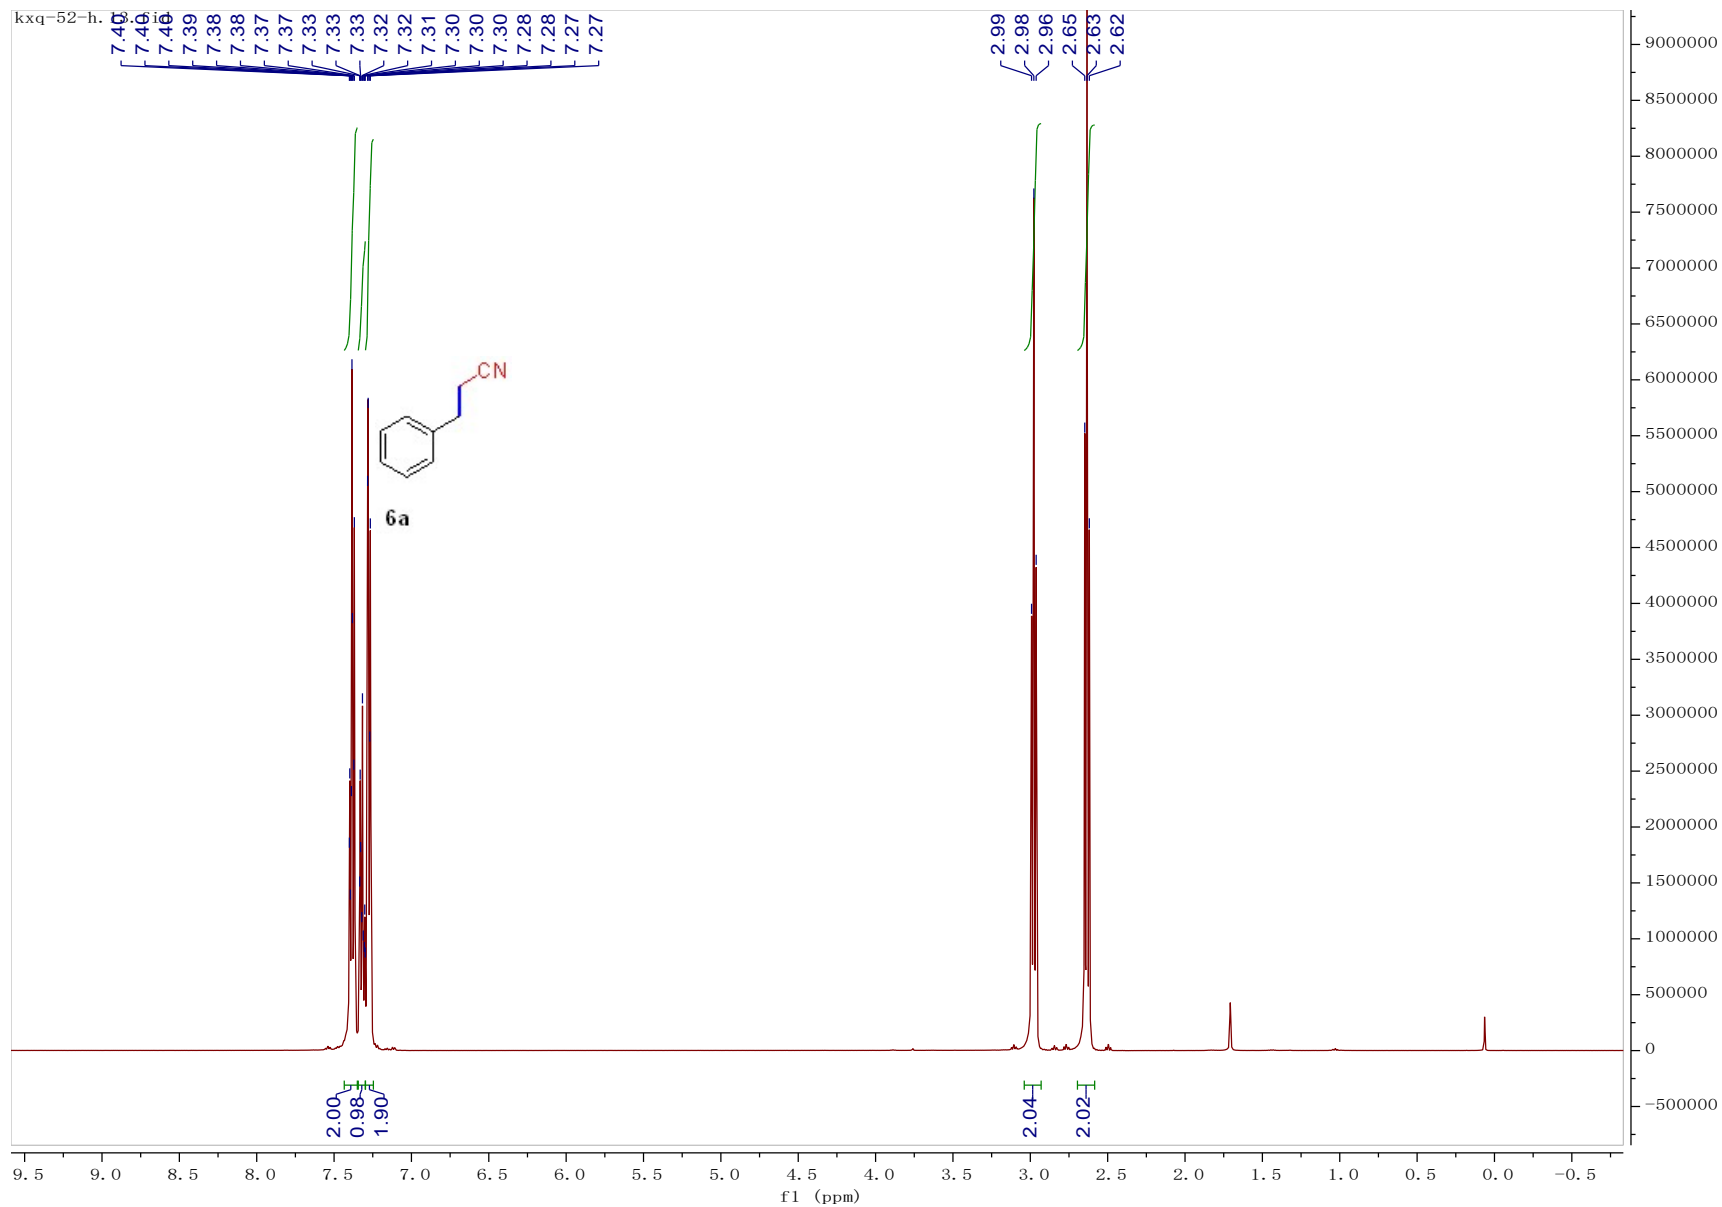

kxq-52-c13.14.fid

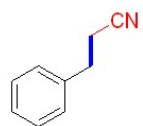

6a

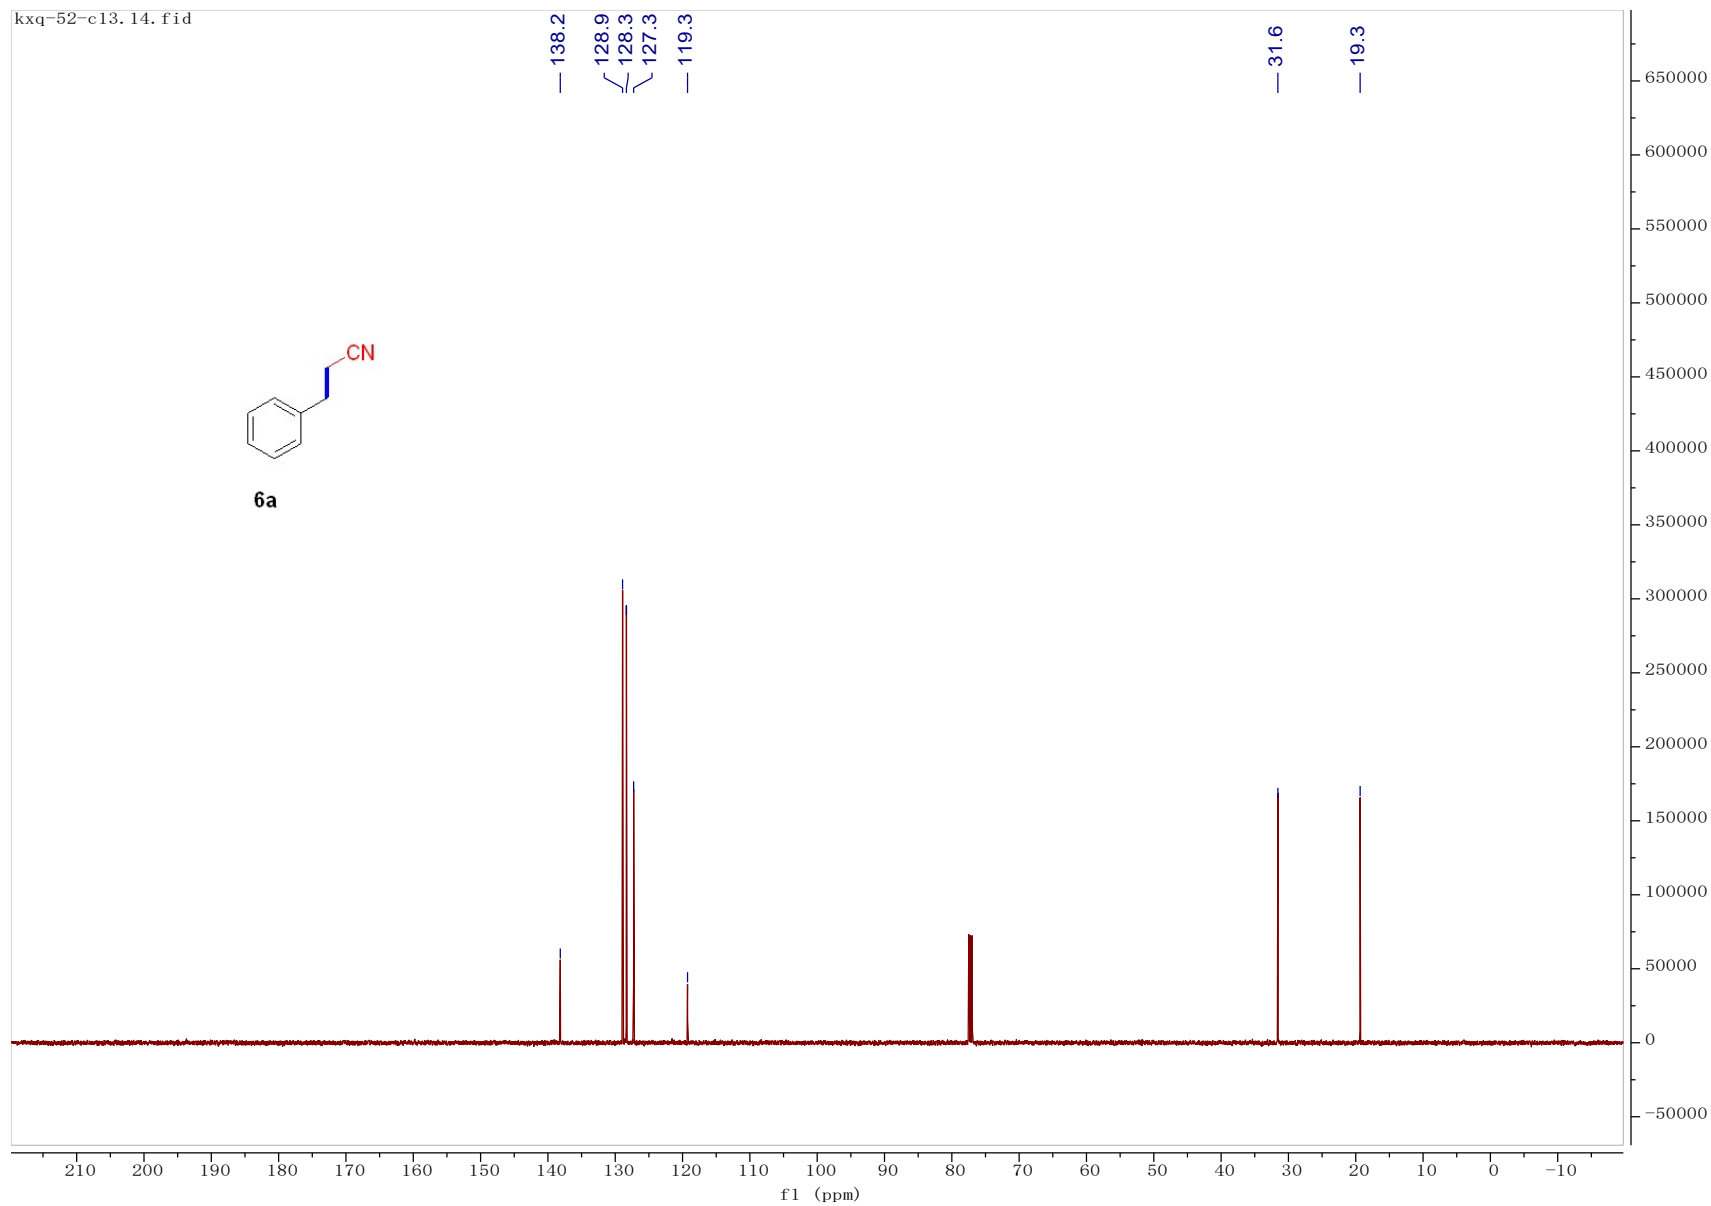

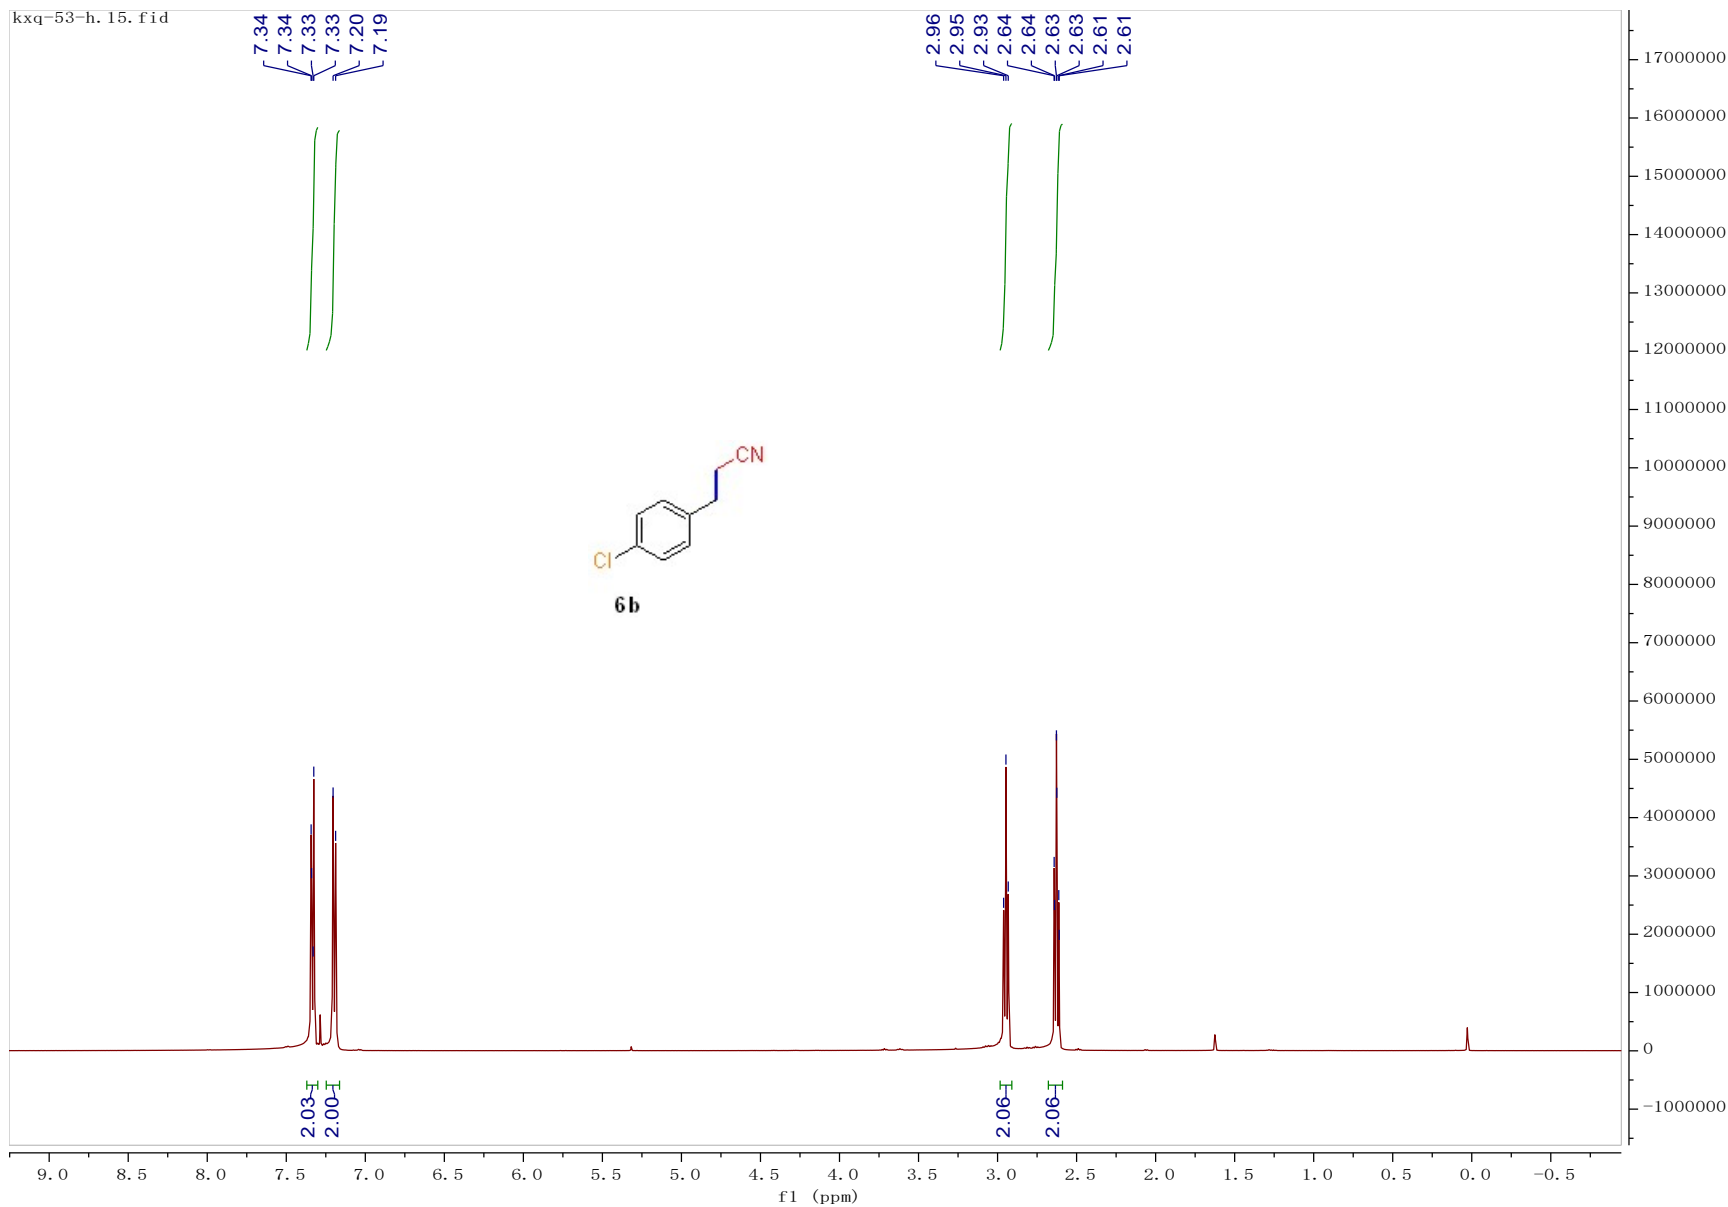



kxq-53-c13.16.fid

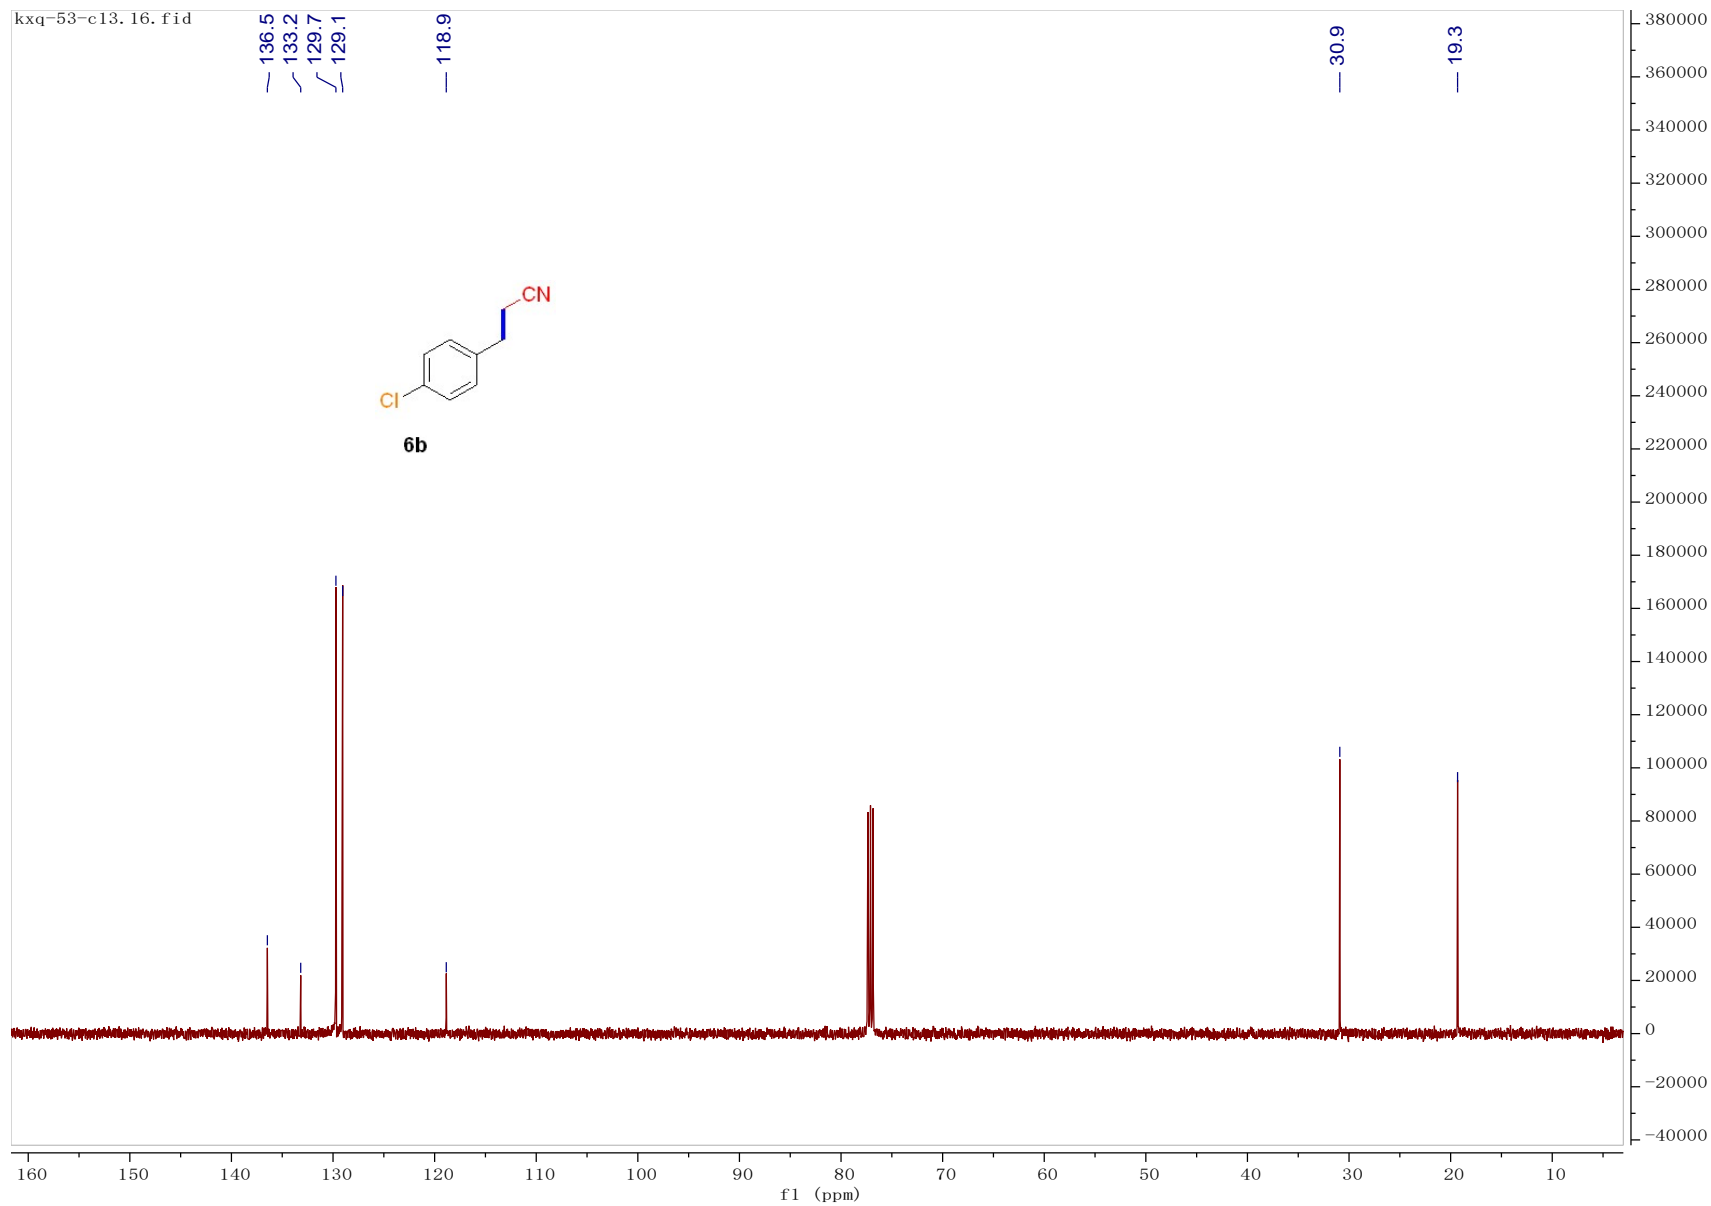

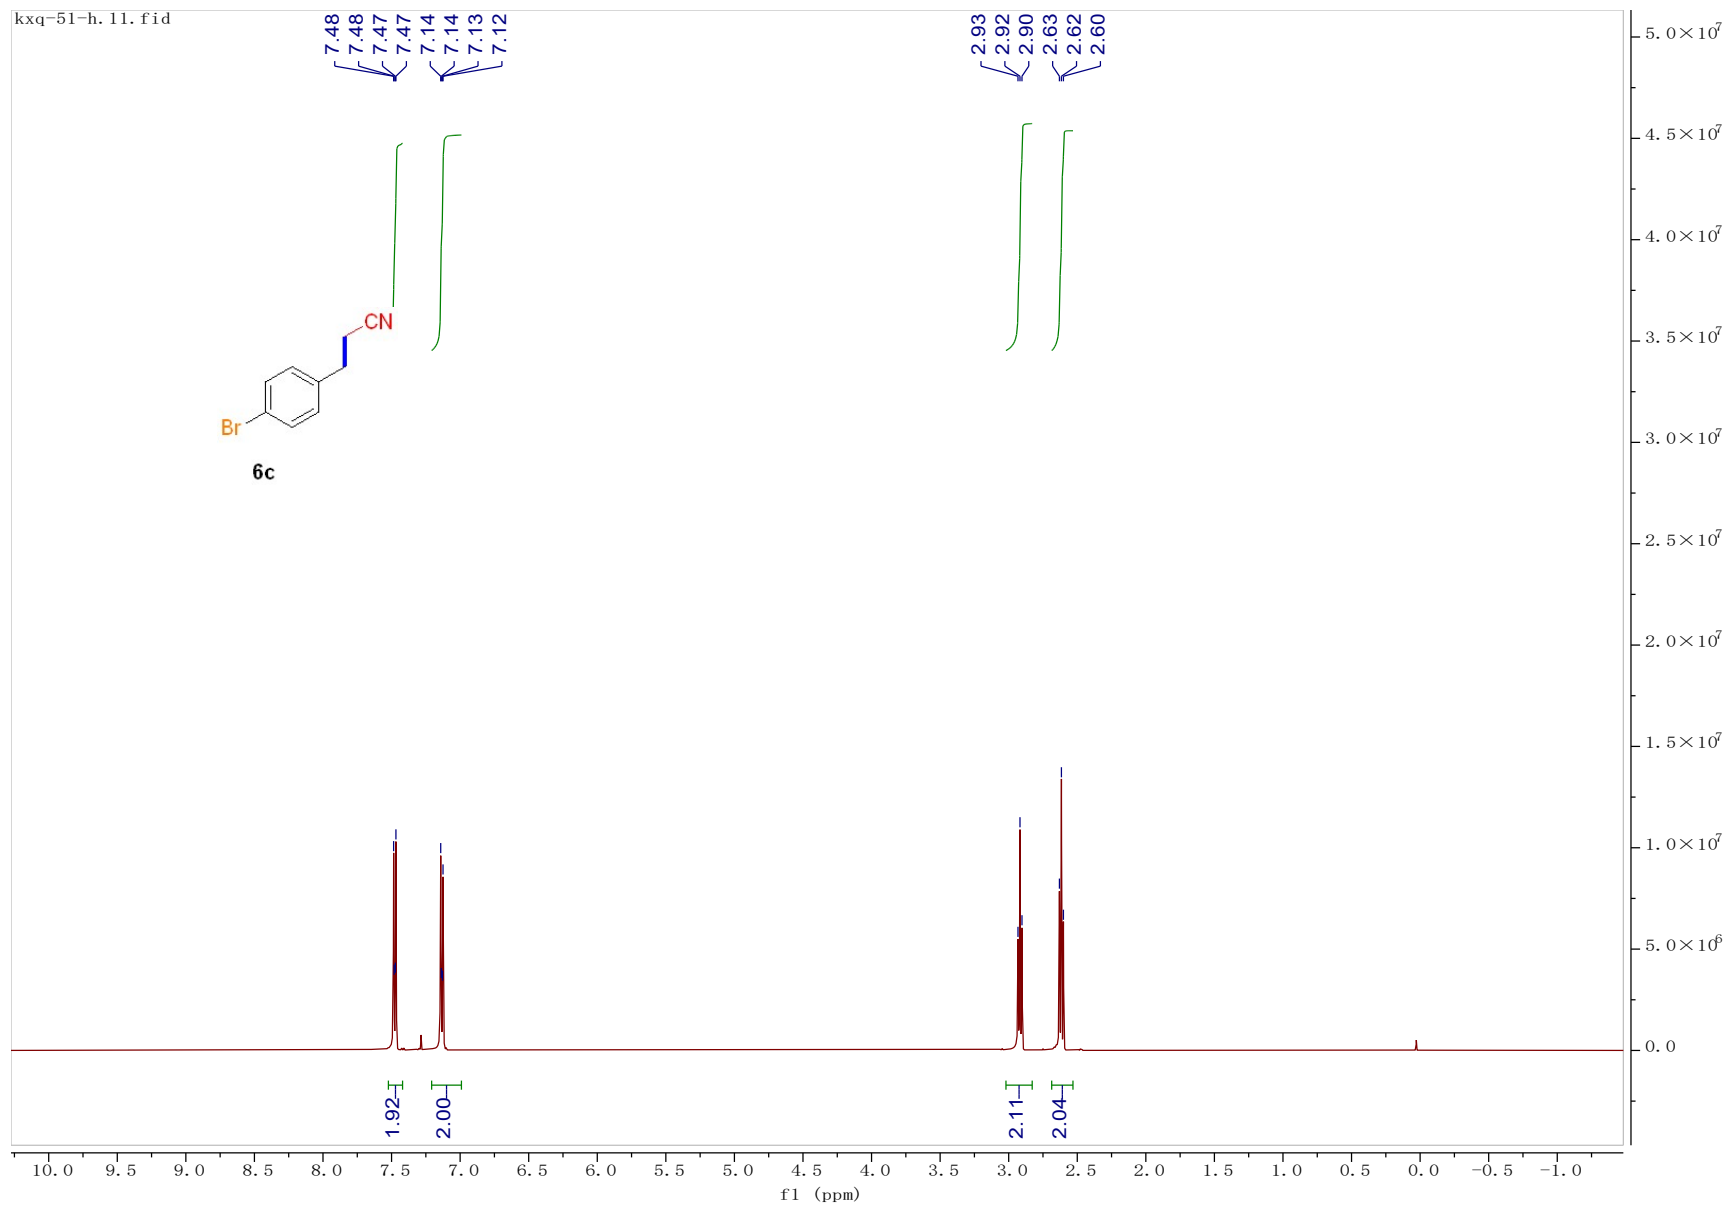

kxq-51-c13.12.fid

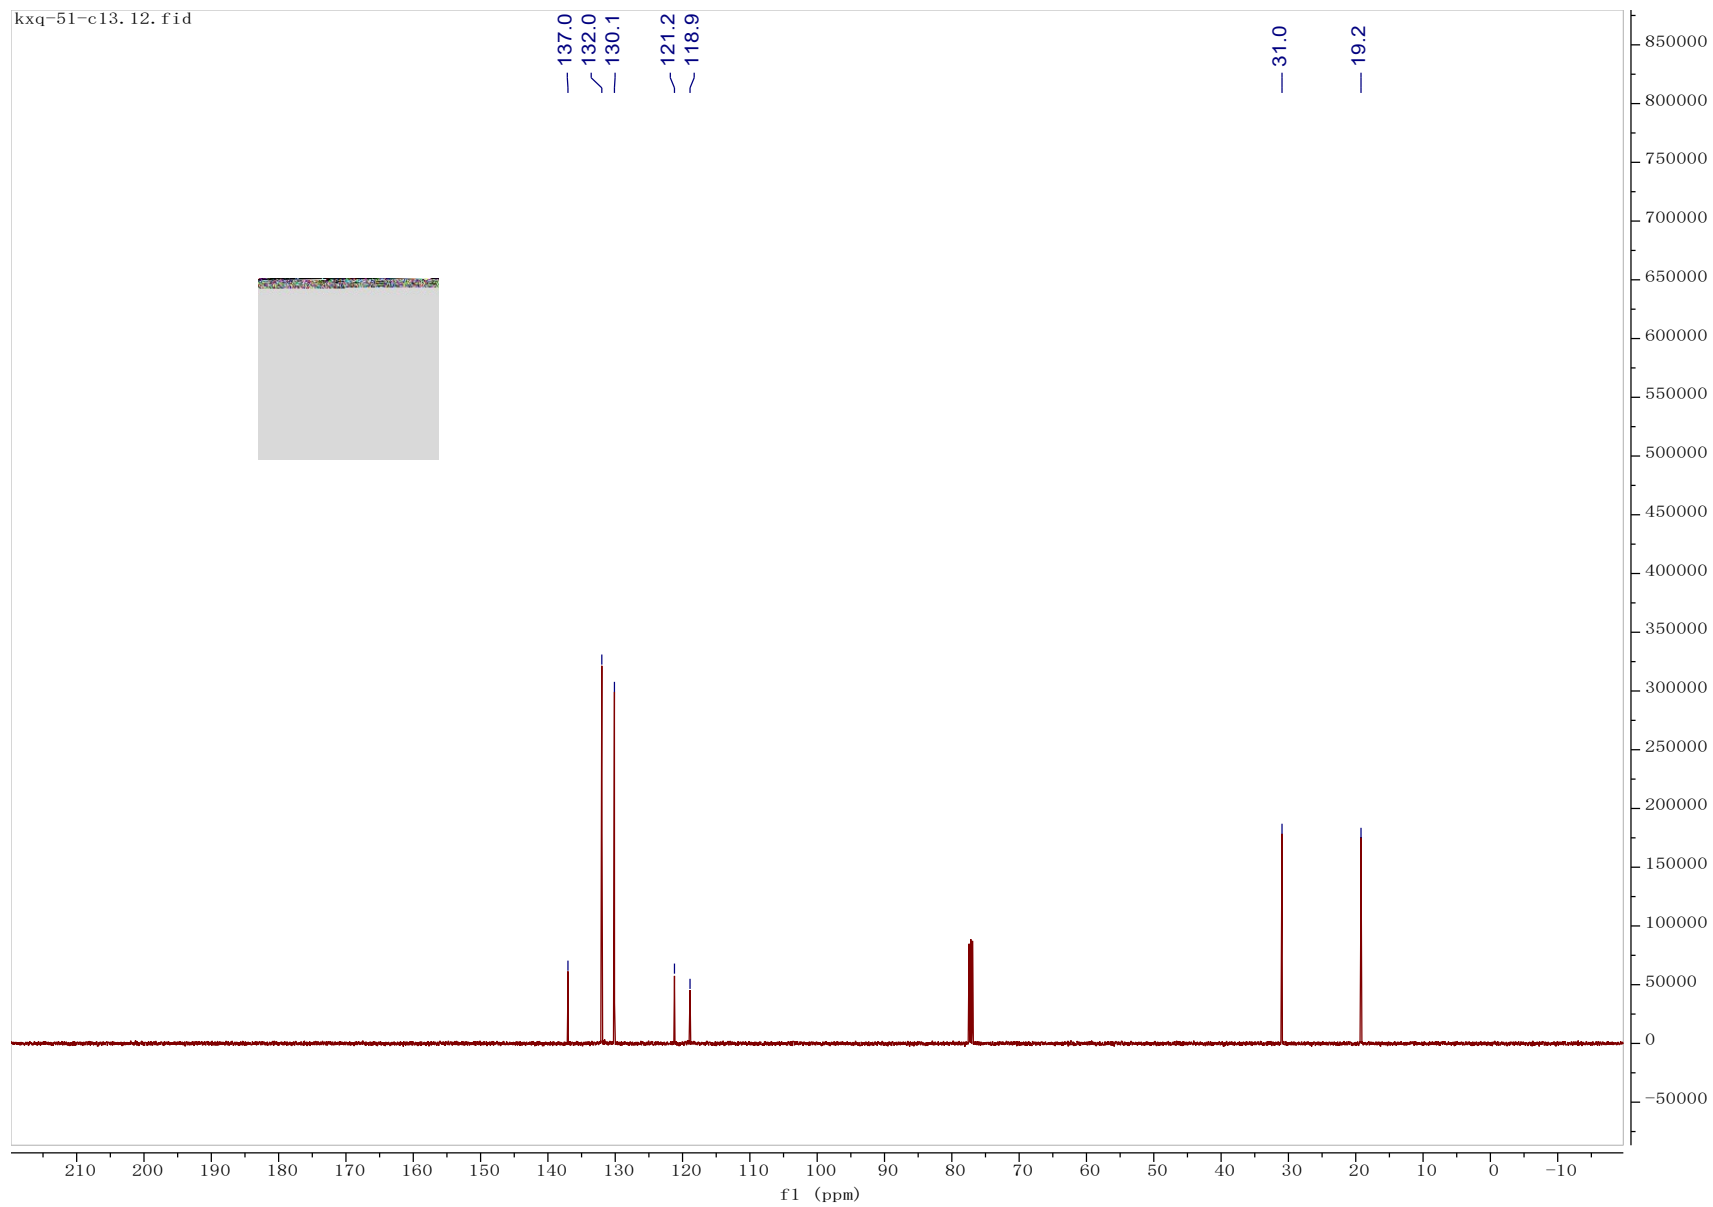

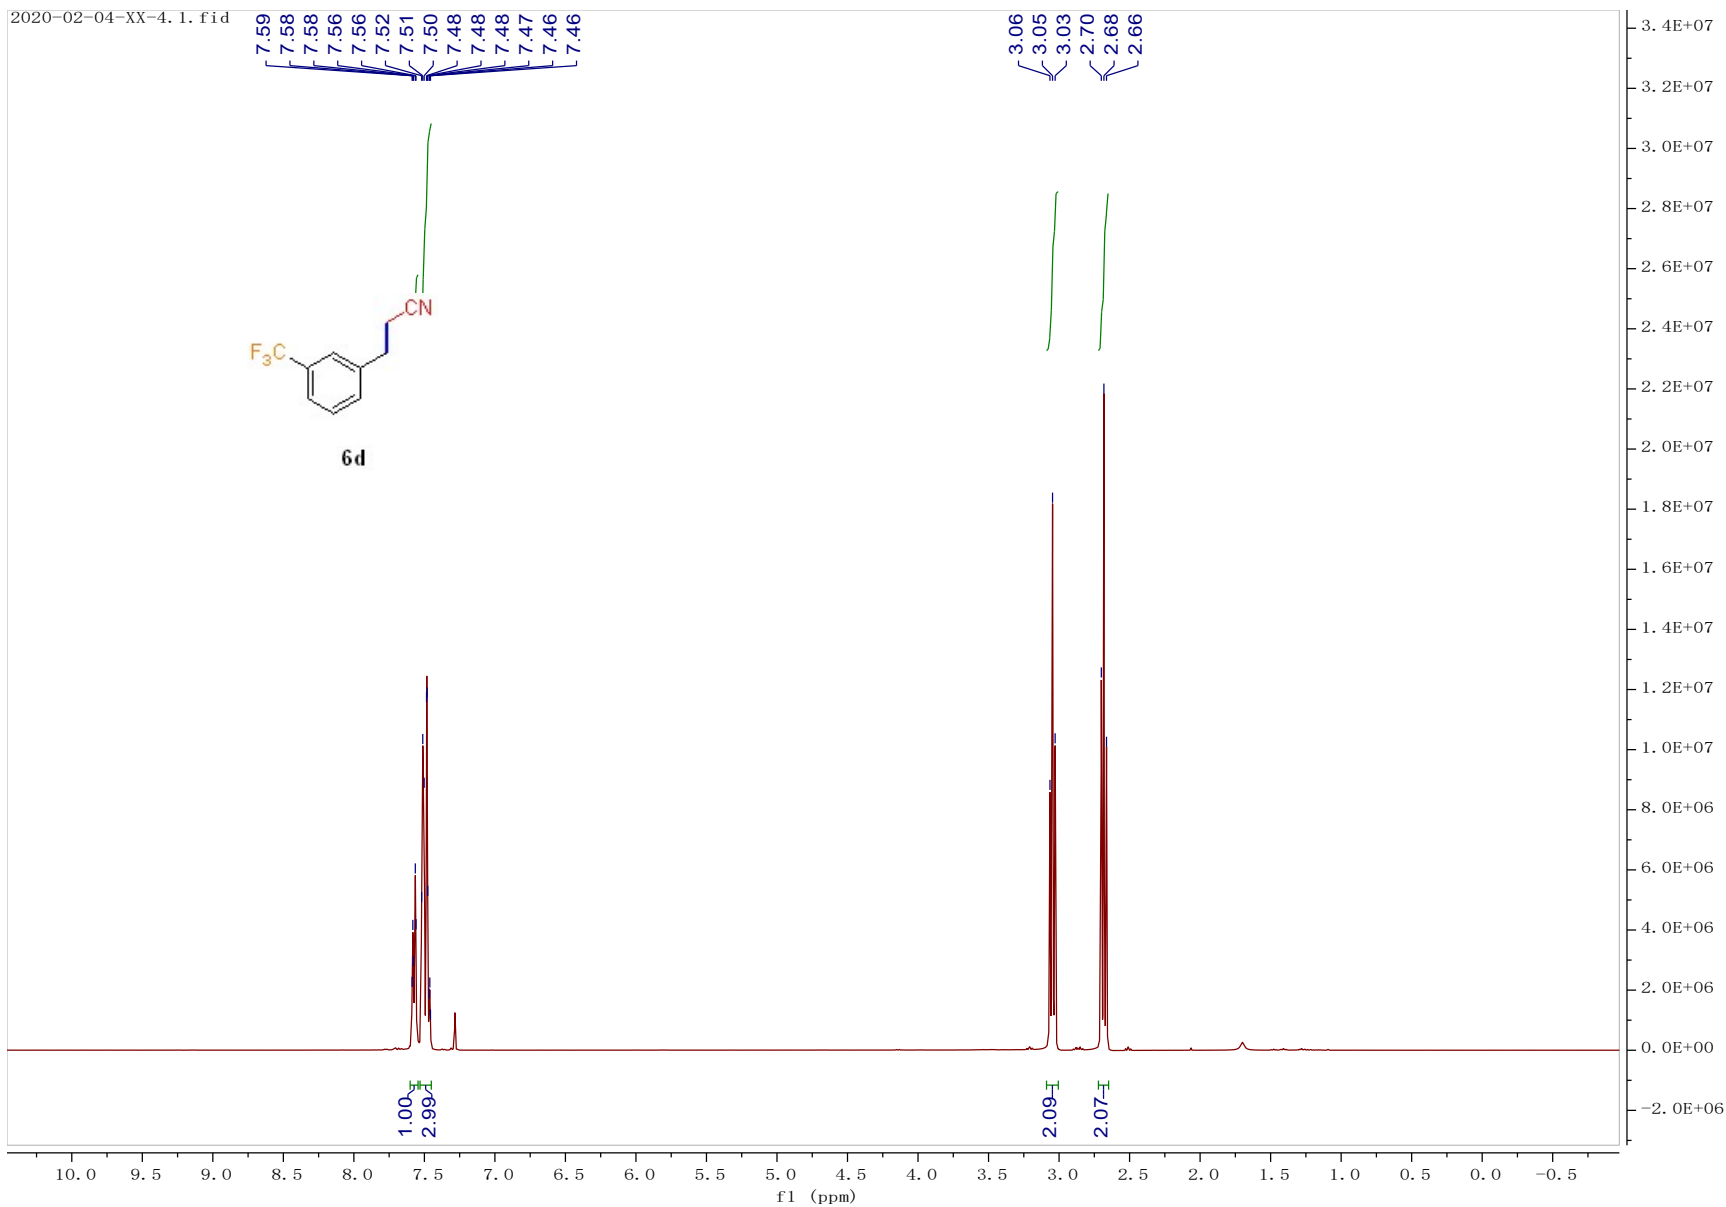

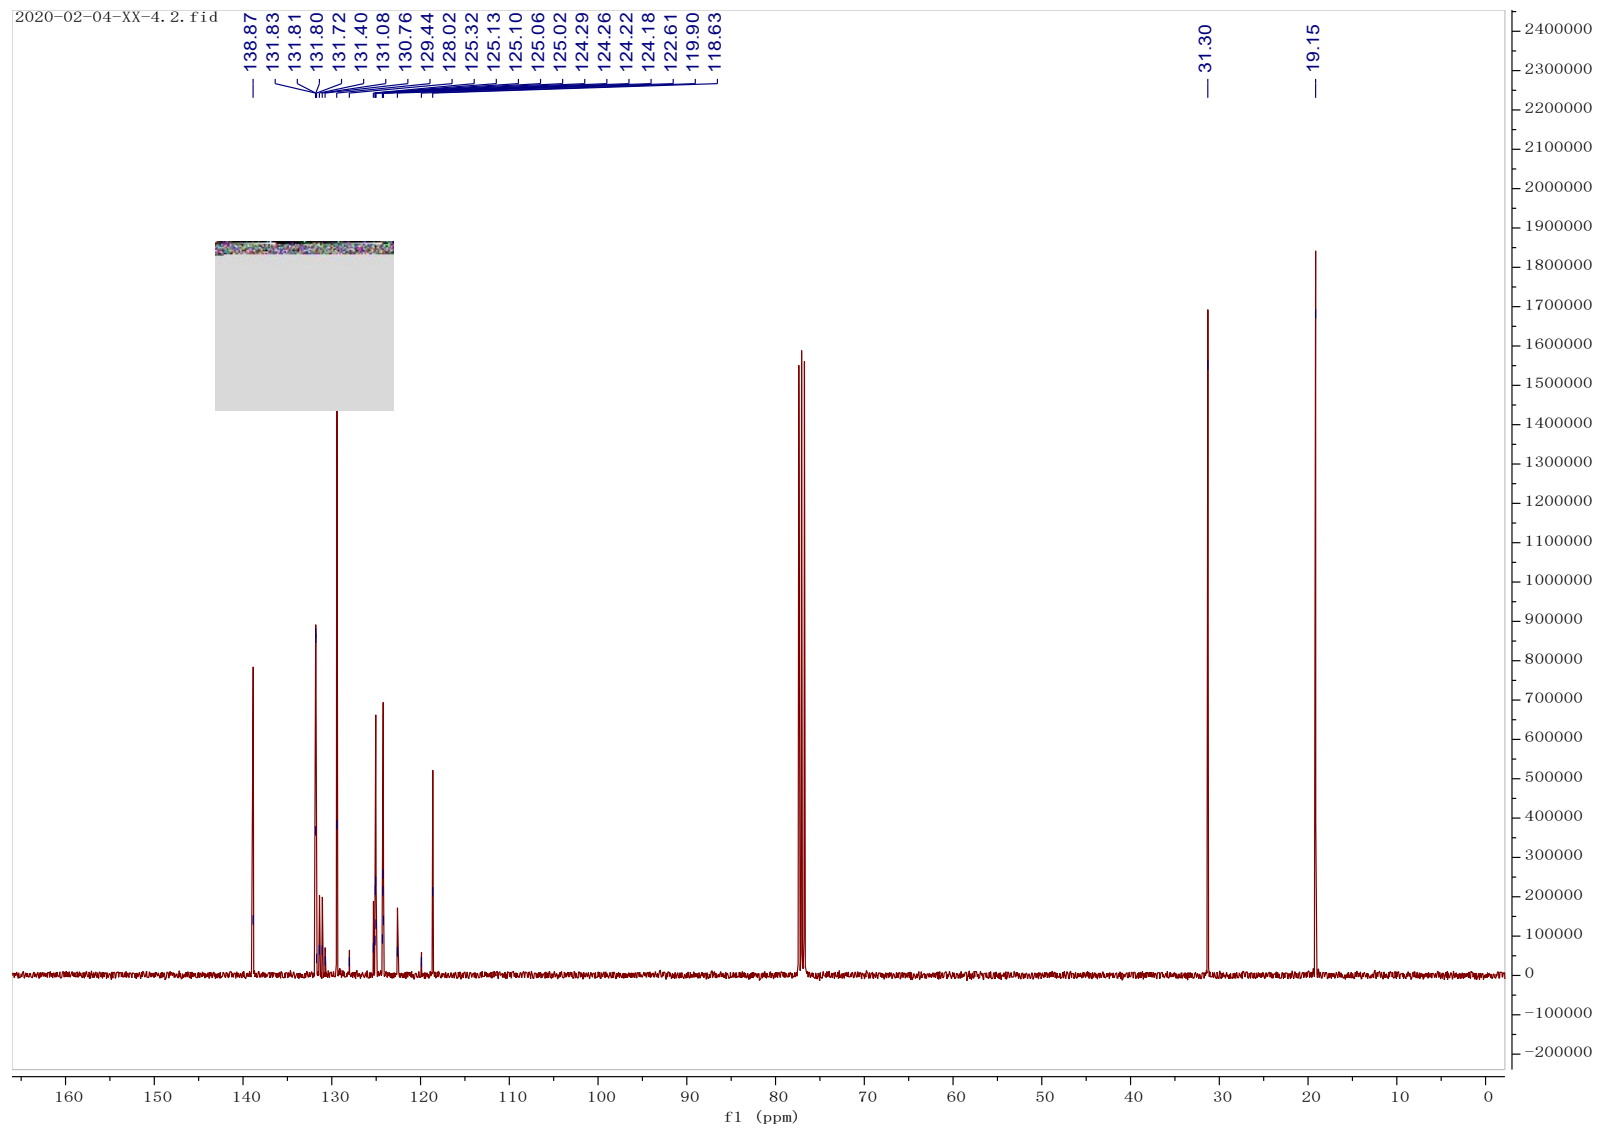

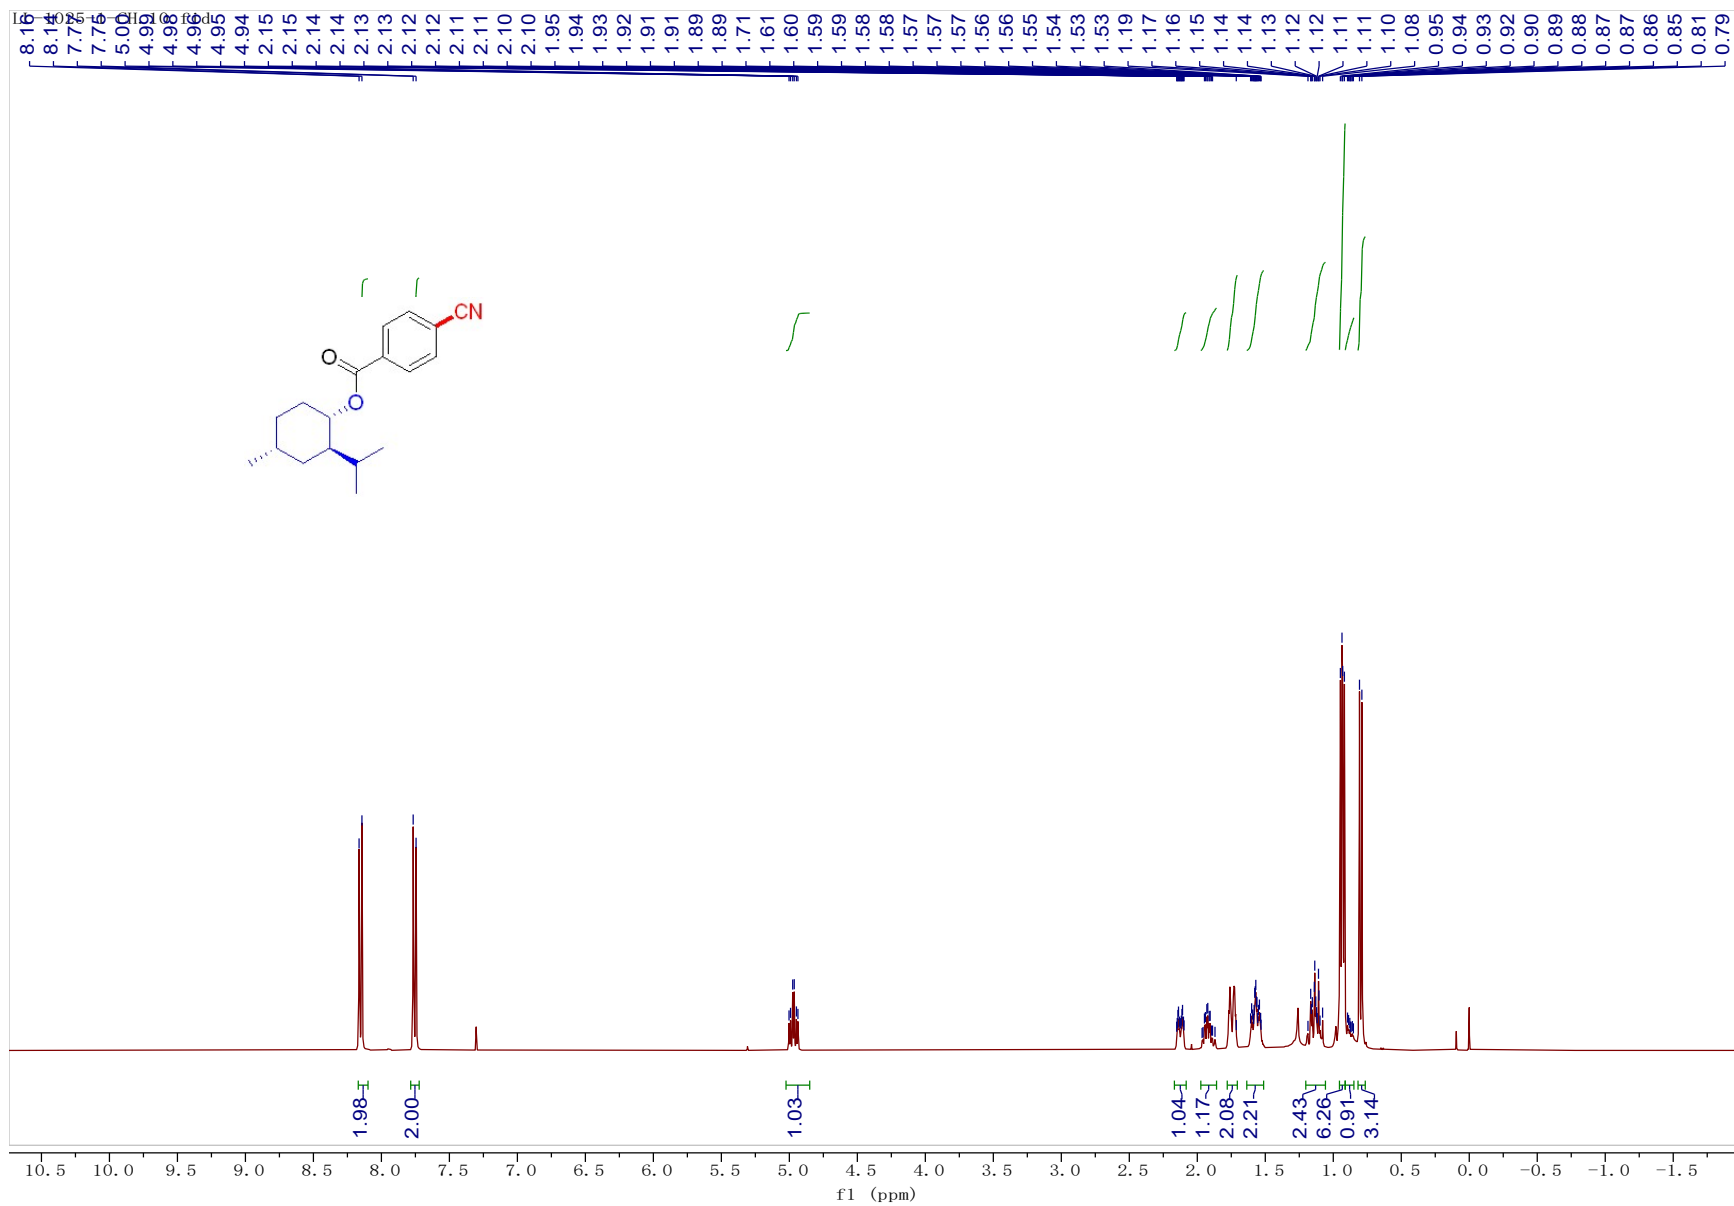

— 164.4

~ 134.6  
~ 132.2  
~ 130.1

~ 118.0  
~ 116.2

— 75.9

— 47.2

— 40.8

~ 34.2

~ 31.4

~ 26.5

~ 23.6

~ 22.0

~ 20.7

~ 16.5

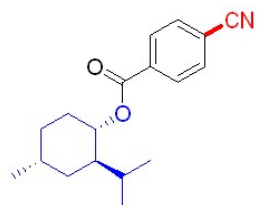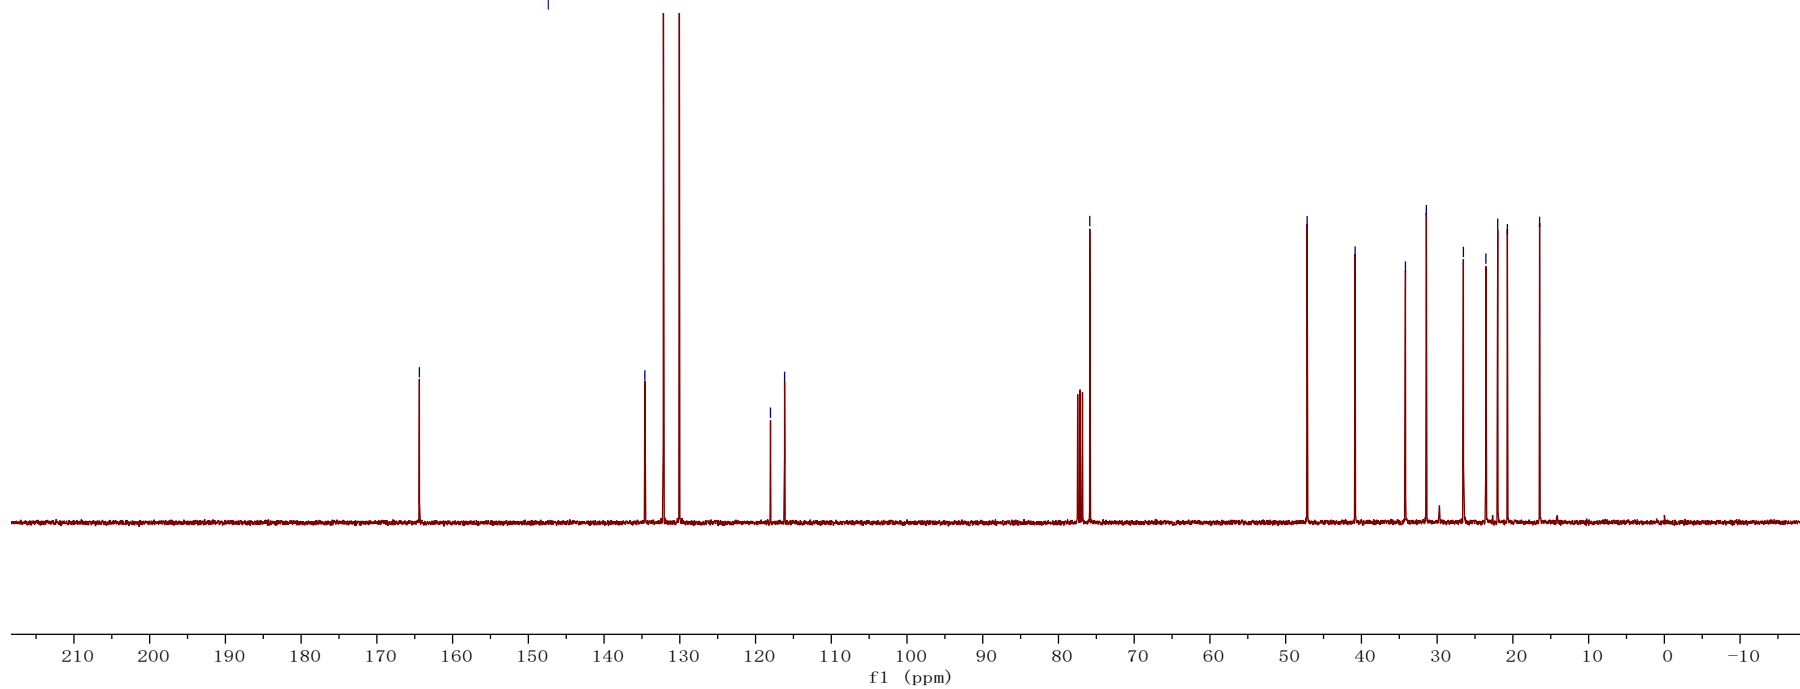

8.15  
8.15  
8.15  
8.10  
7.76  
7.73  
7.73  
7.73  
5.44  
5.43  
5.42  
2.48  
2.48  
2.47  
2.46  
2.45  
2.02  
2.01  
1.98  
1.59  
1.59  
1.58  
1.57  
1.54  
1.53  
1.53  
1.52  
1.52  
1.51  
1.50  
1.50  
1.49  
1.49  
1.36  
1.35  
1.35  
1.33  
1.25  
1.22  
1.21  
1.19  
1.17  
1.16  
1.14  
1.13  
1.12  
1.12  
1.10  
1.09  
1.09  
1.07  
1.06  
1.03  
1.03  
1.02  
1.01  
1.01  
1.00  
0.99  
0.98  
0.93  
0.91  
0.88  
0.87  
0.86  
0.86  
0.69

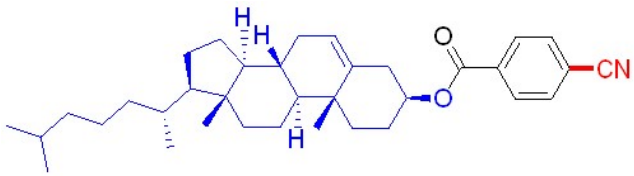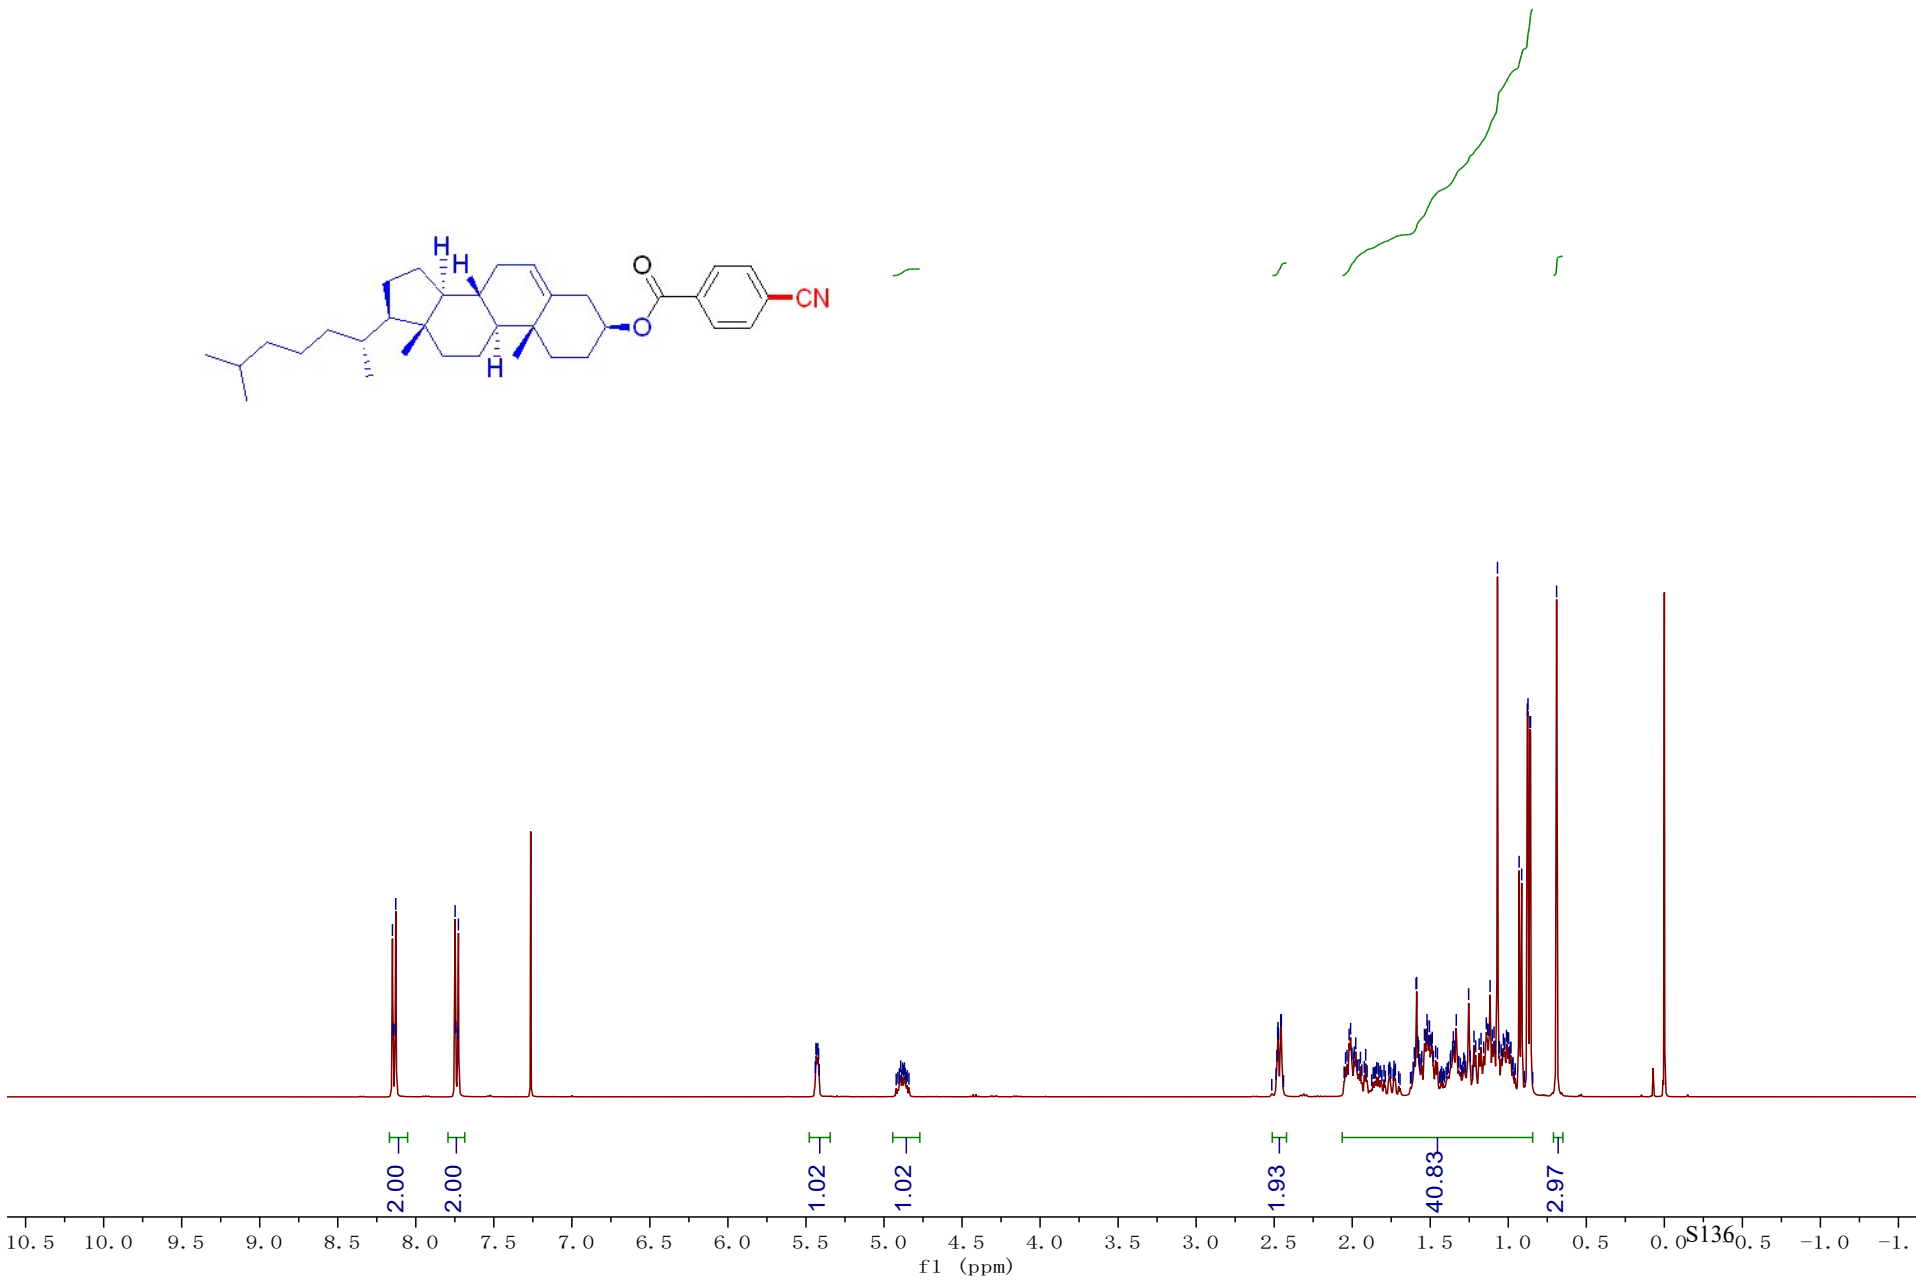



LL-1023-2-CH. 23. fid

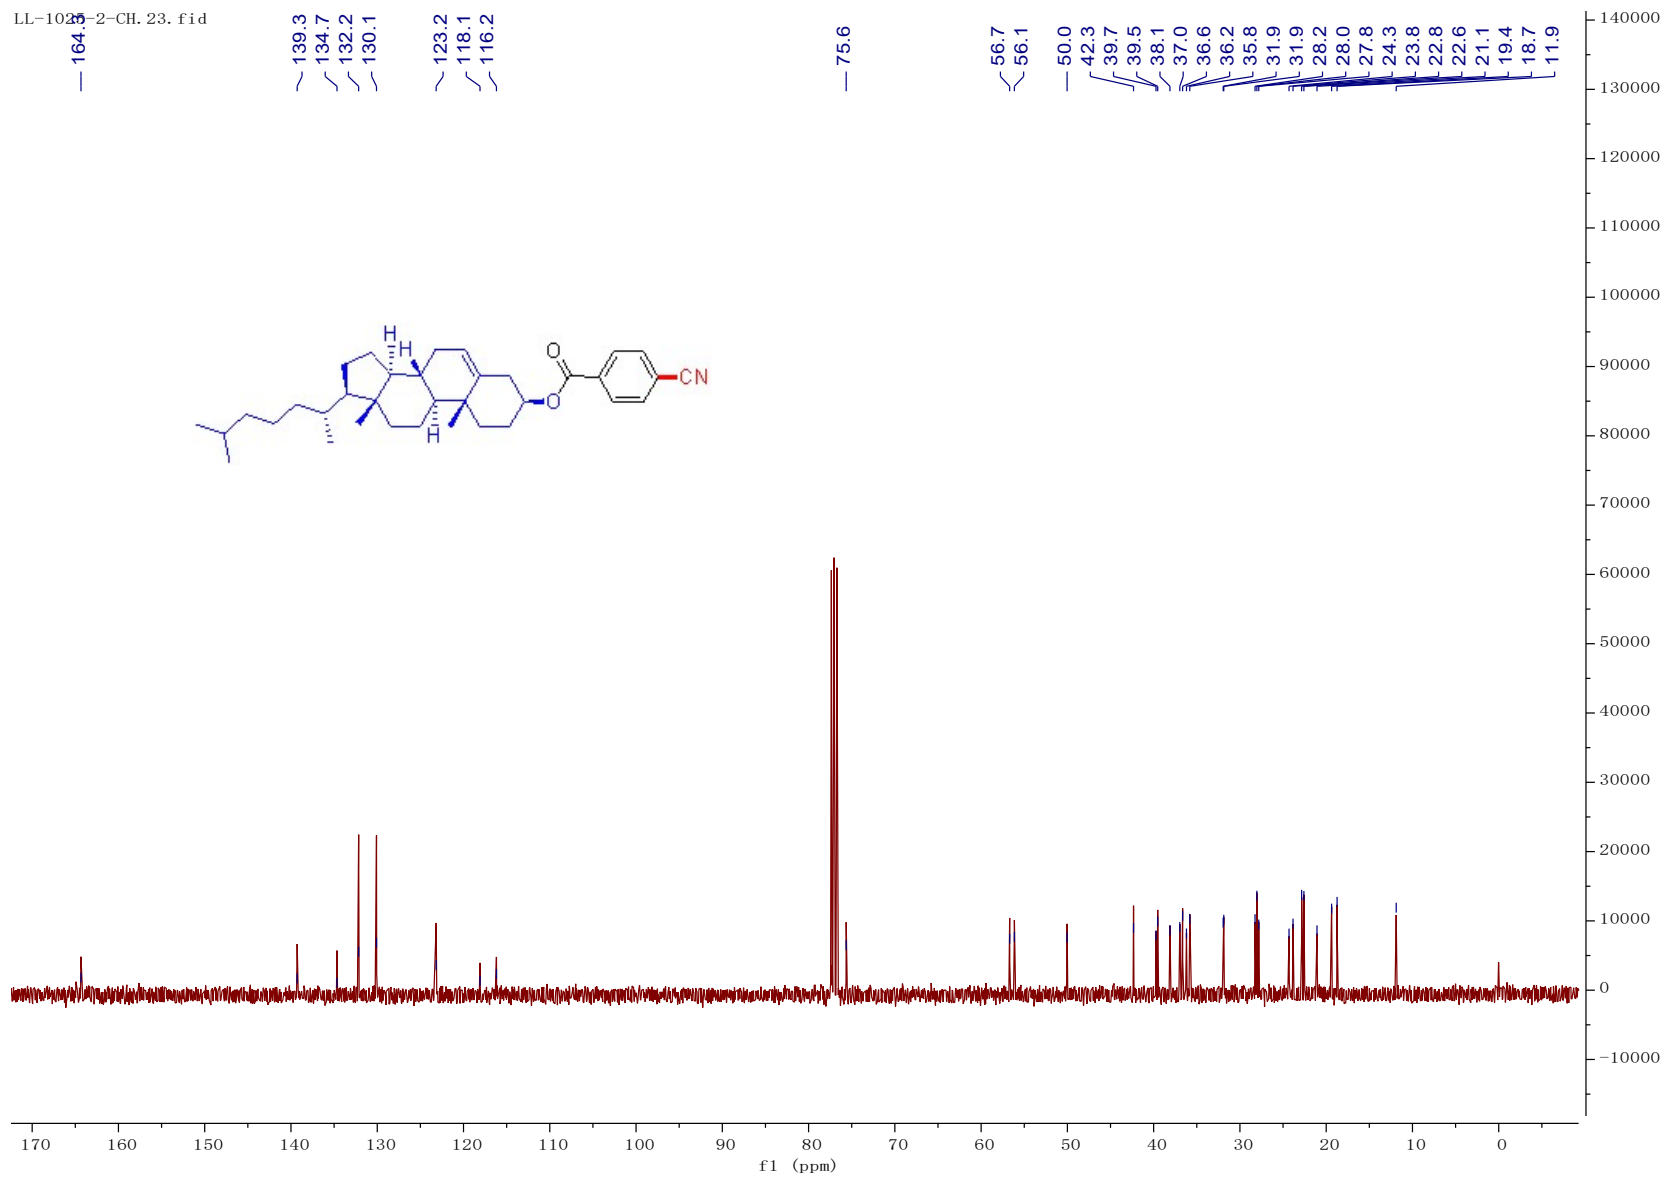

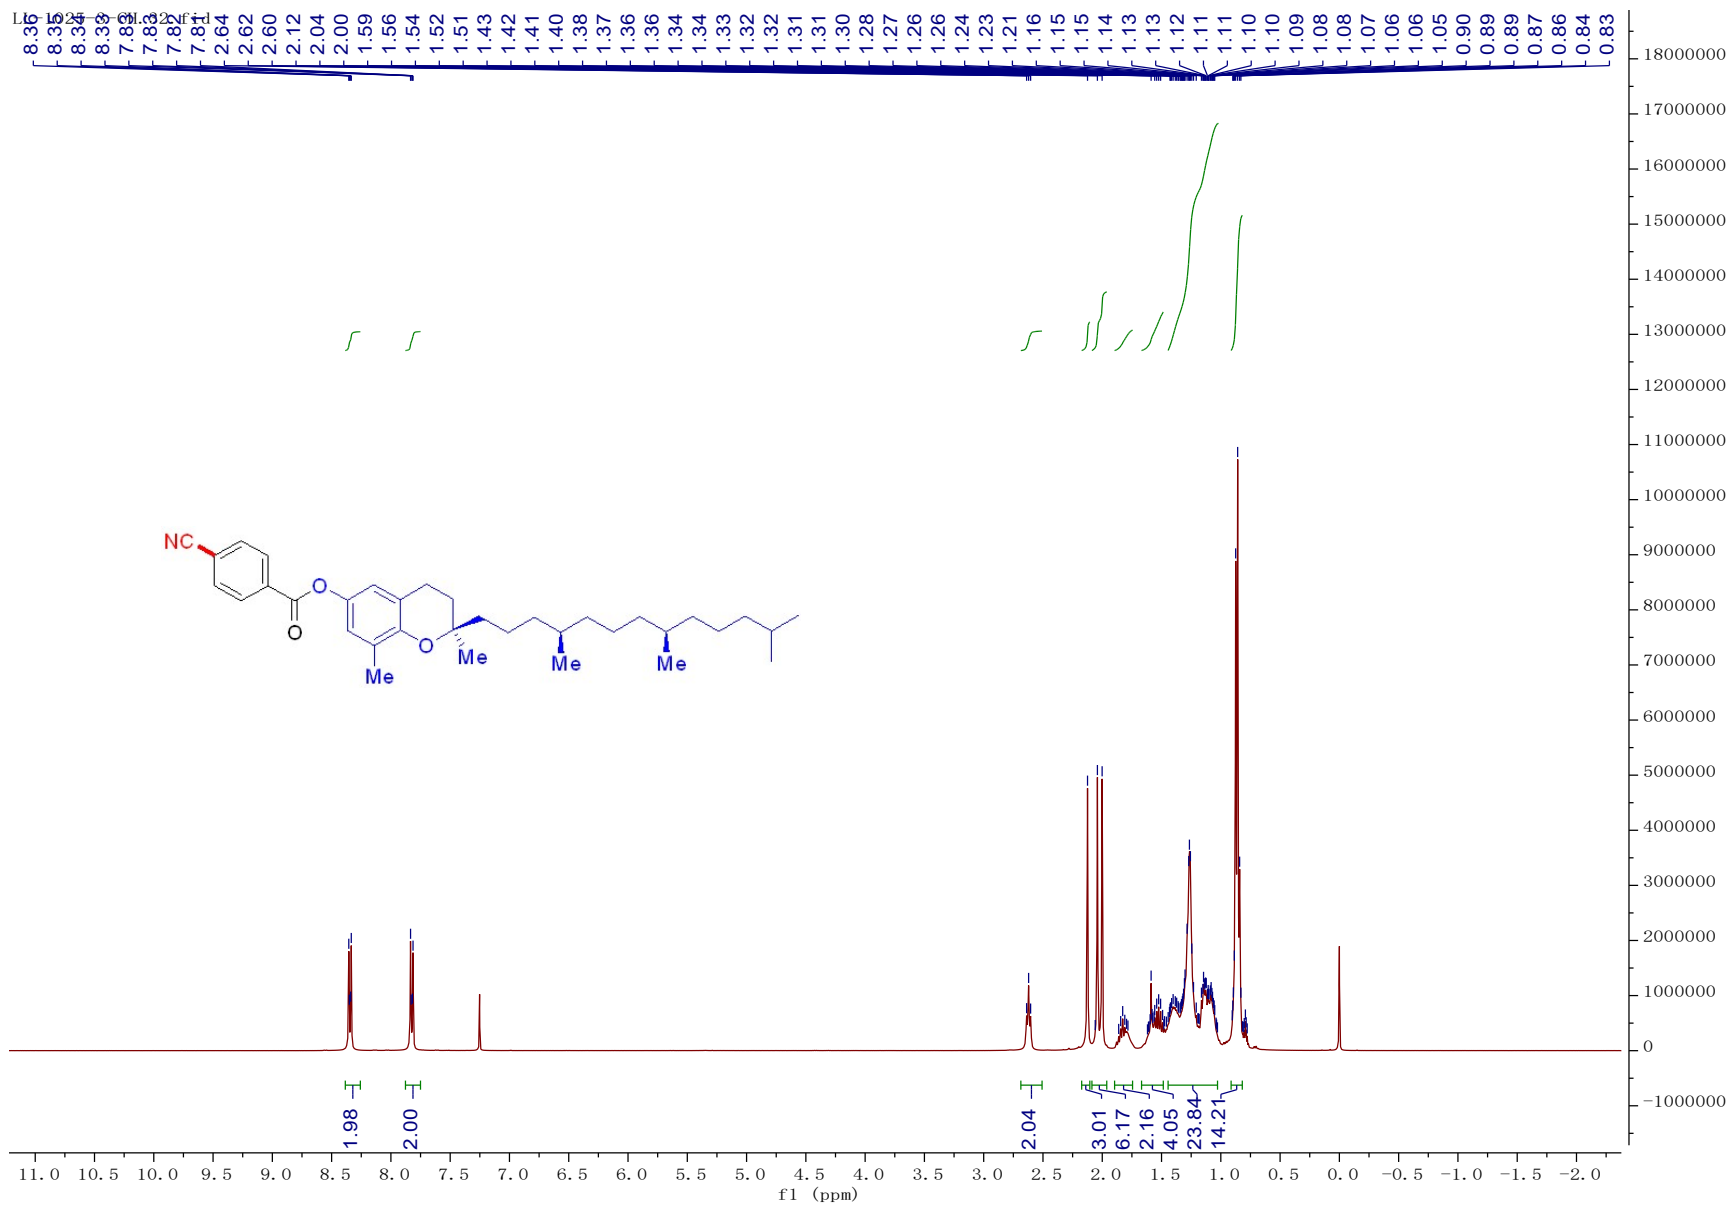

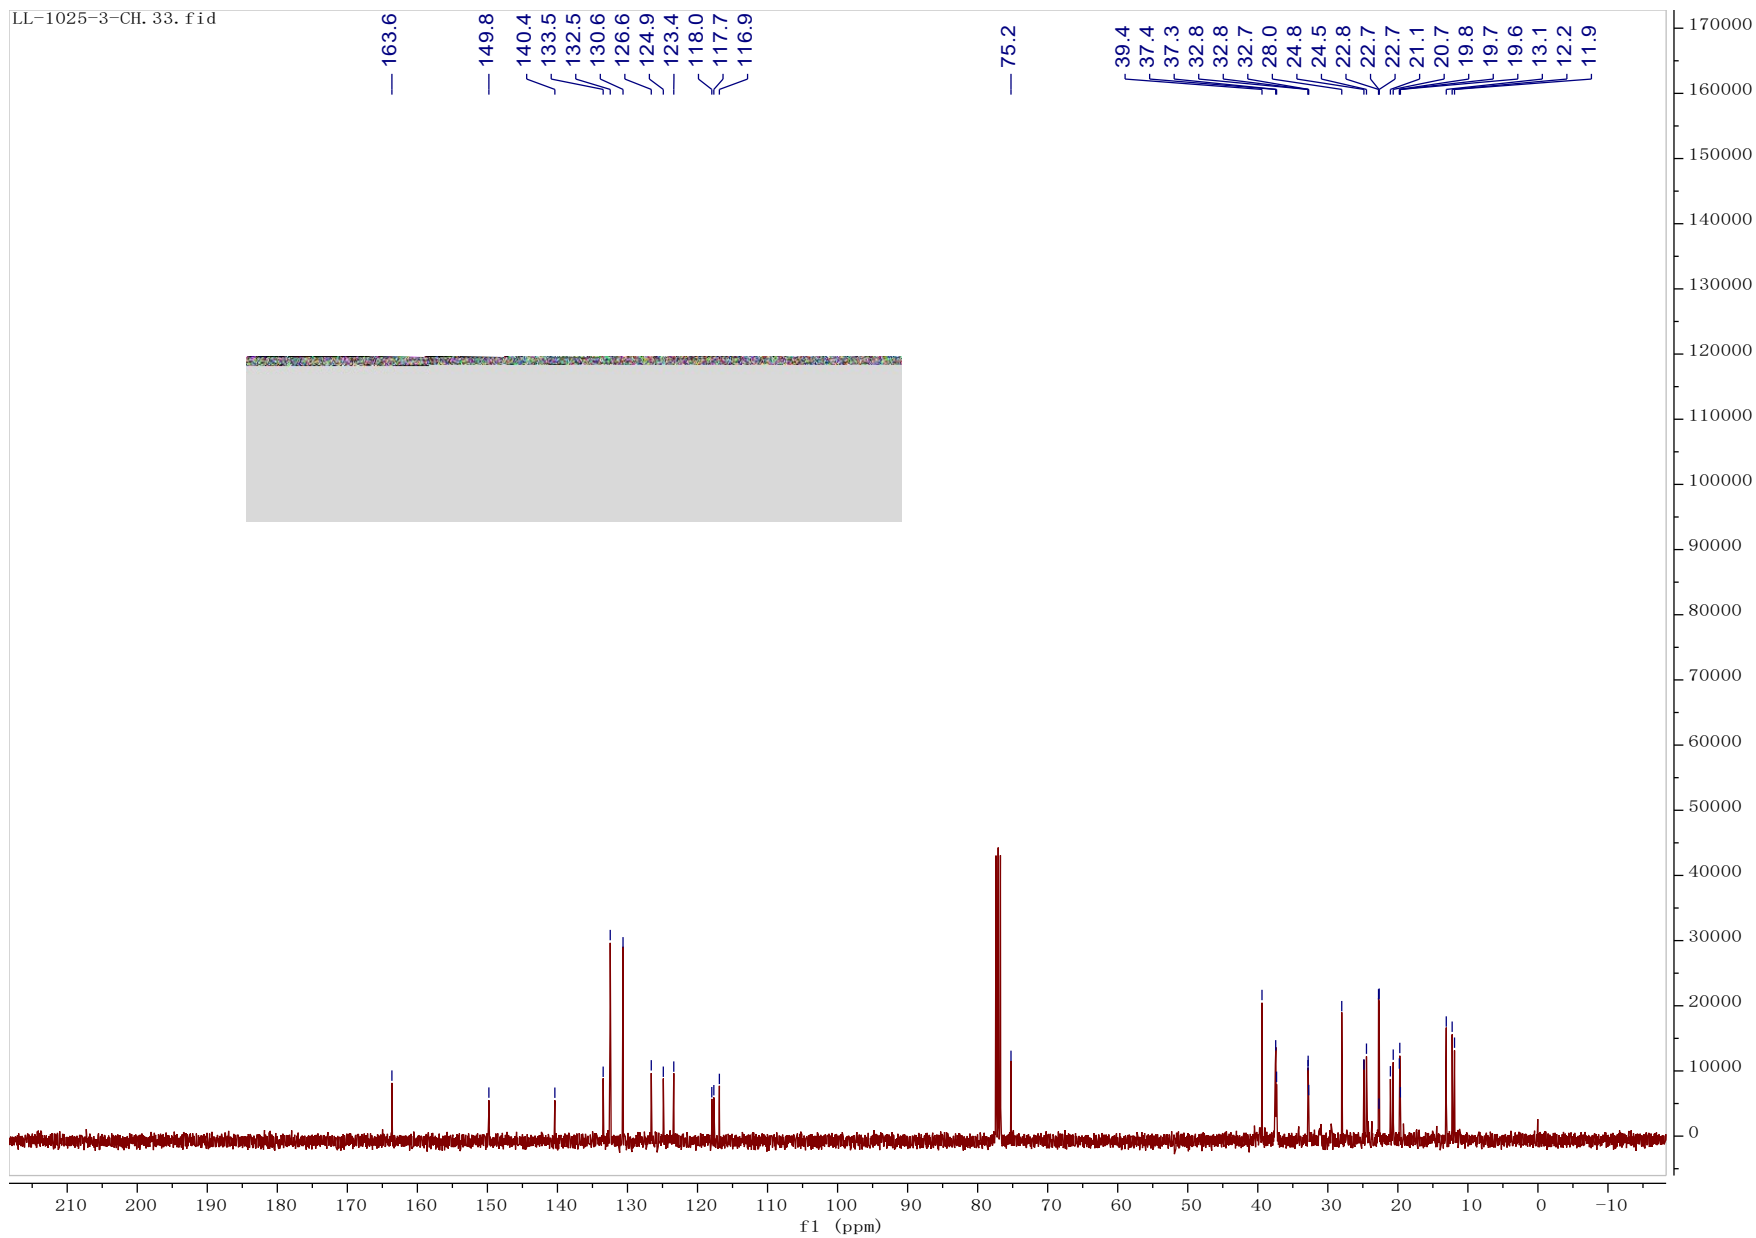

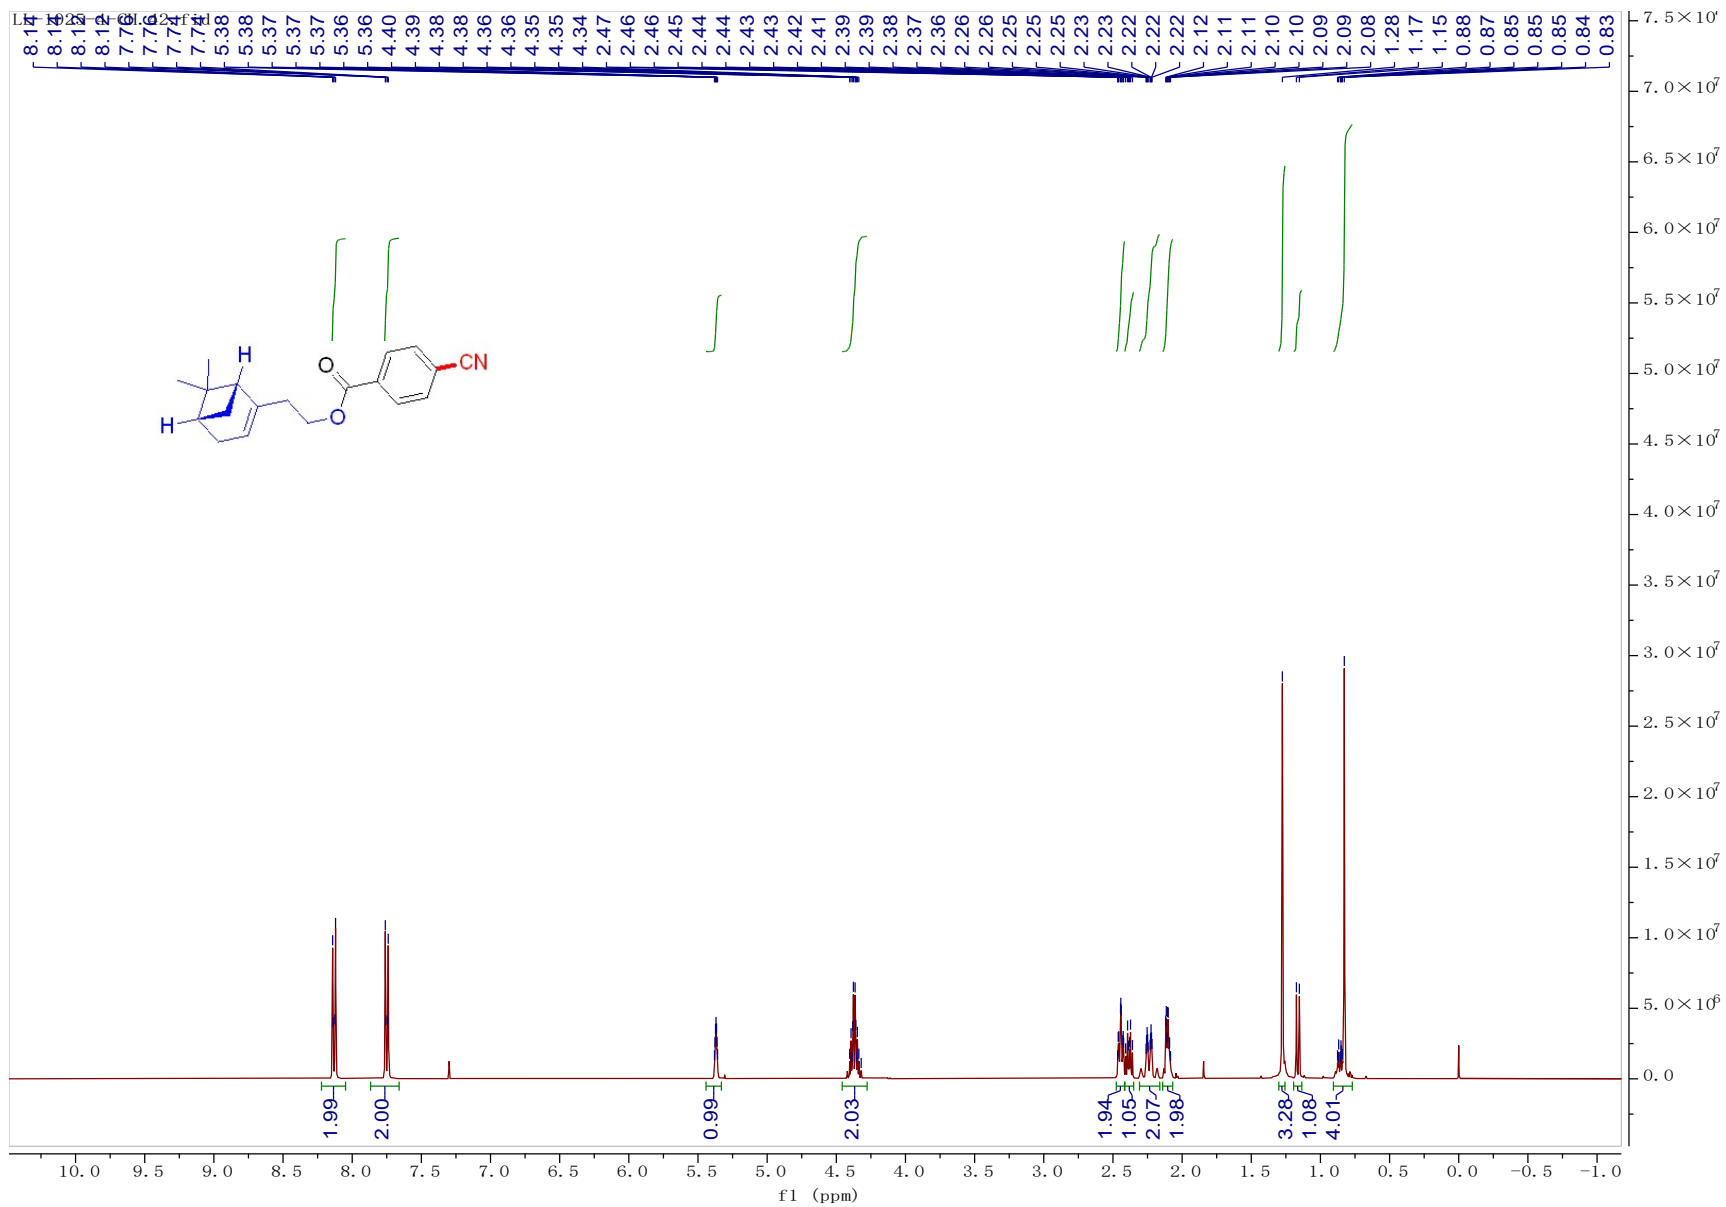

LL-1025-4-CH. 43. fid

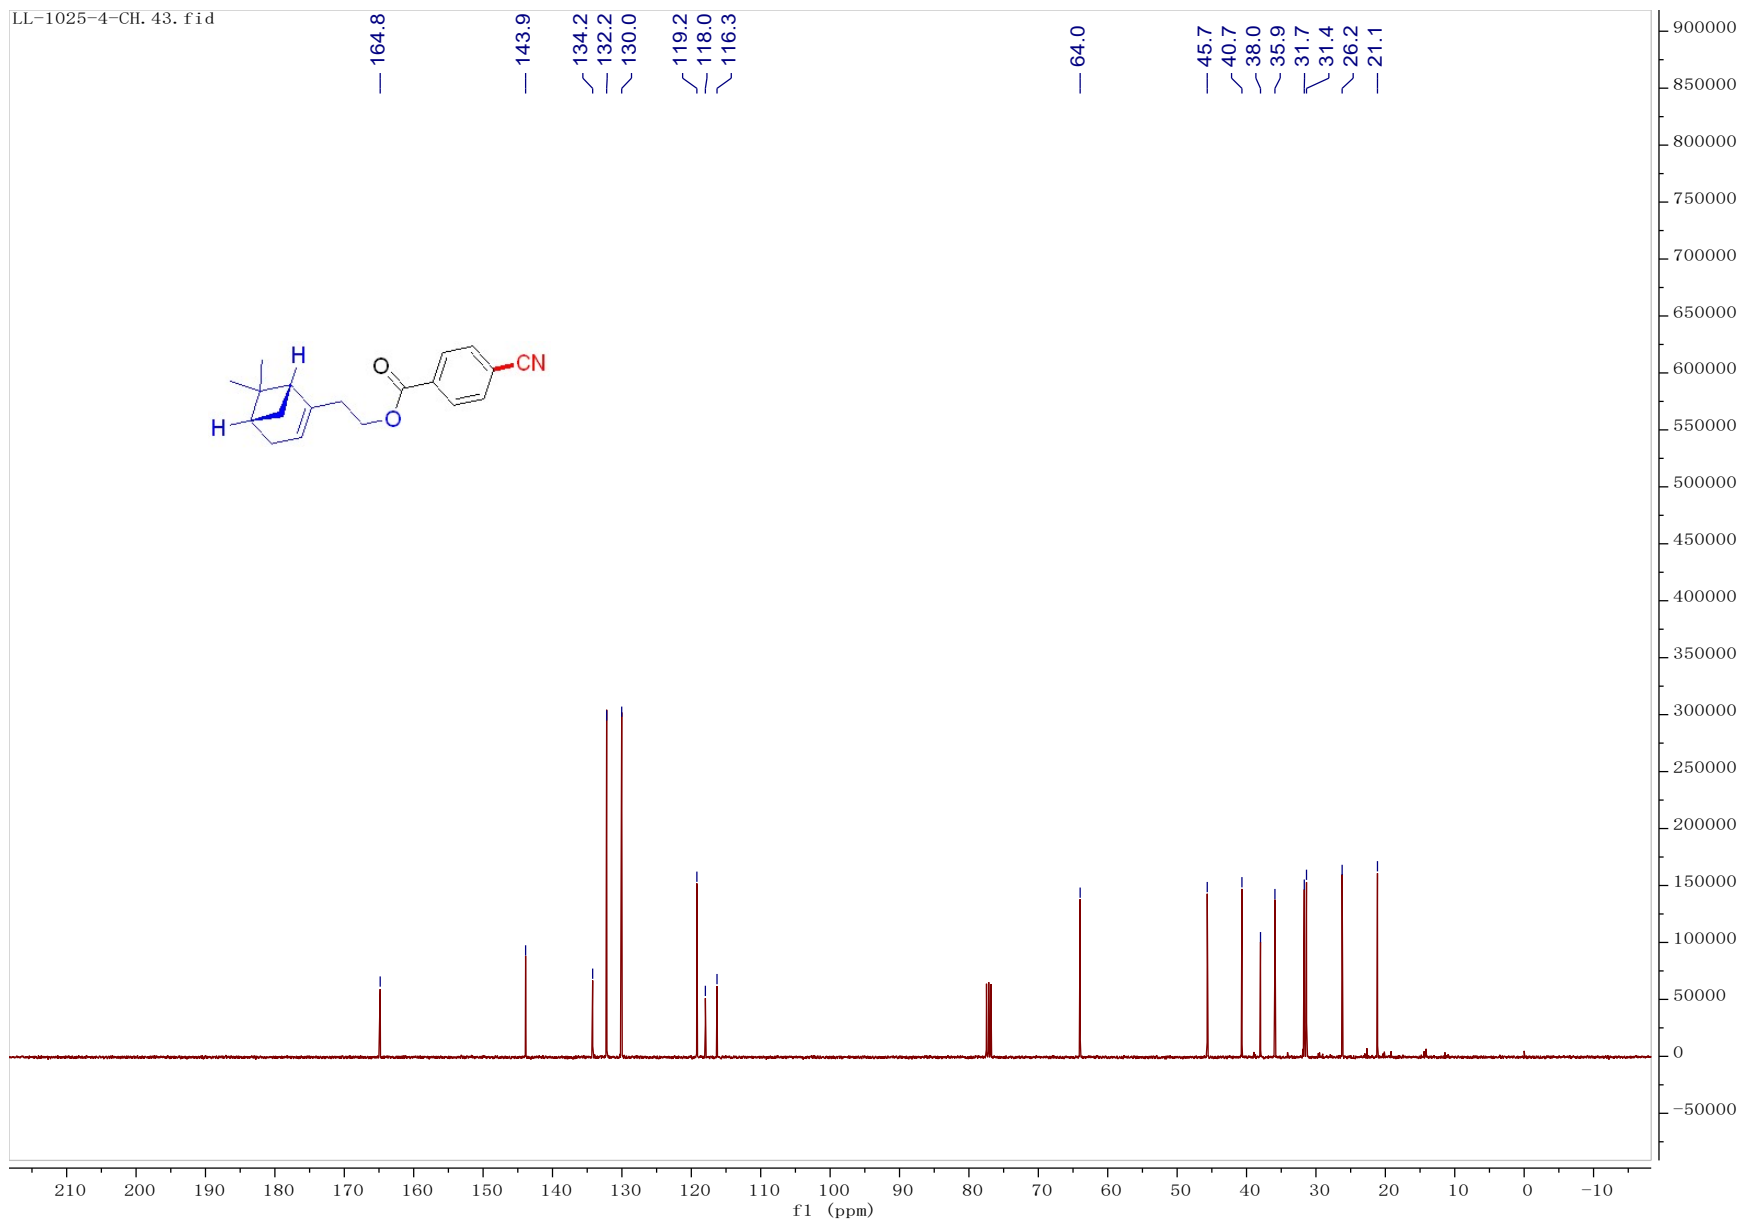

KXQ-2-3-CH. 20. fid

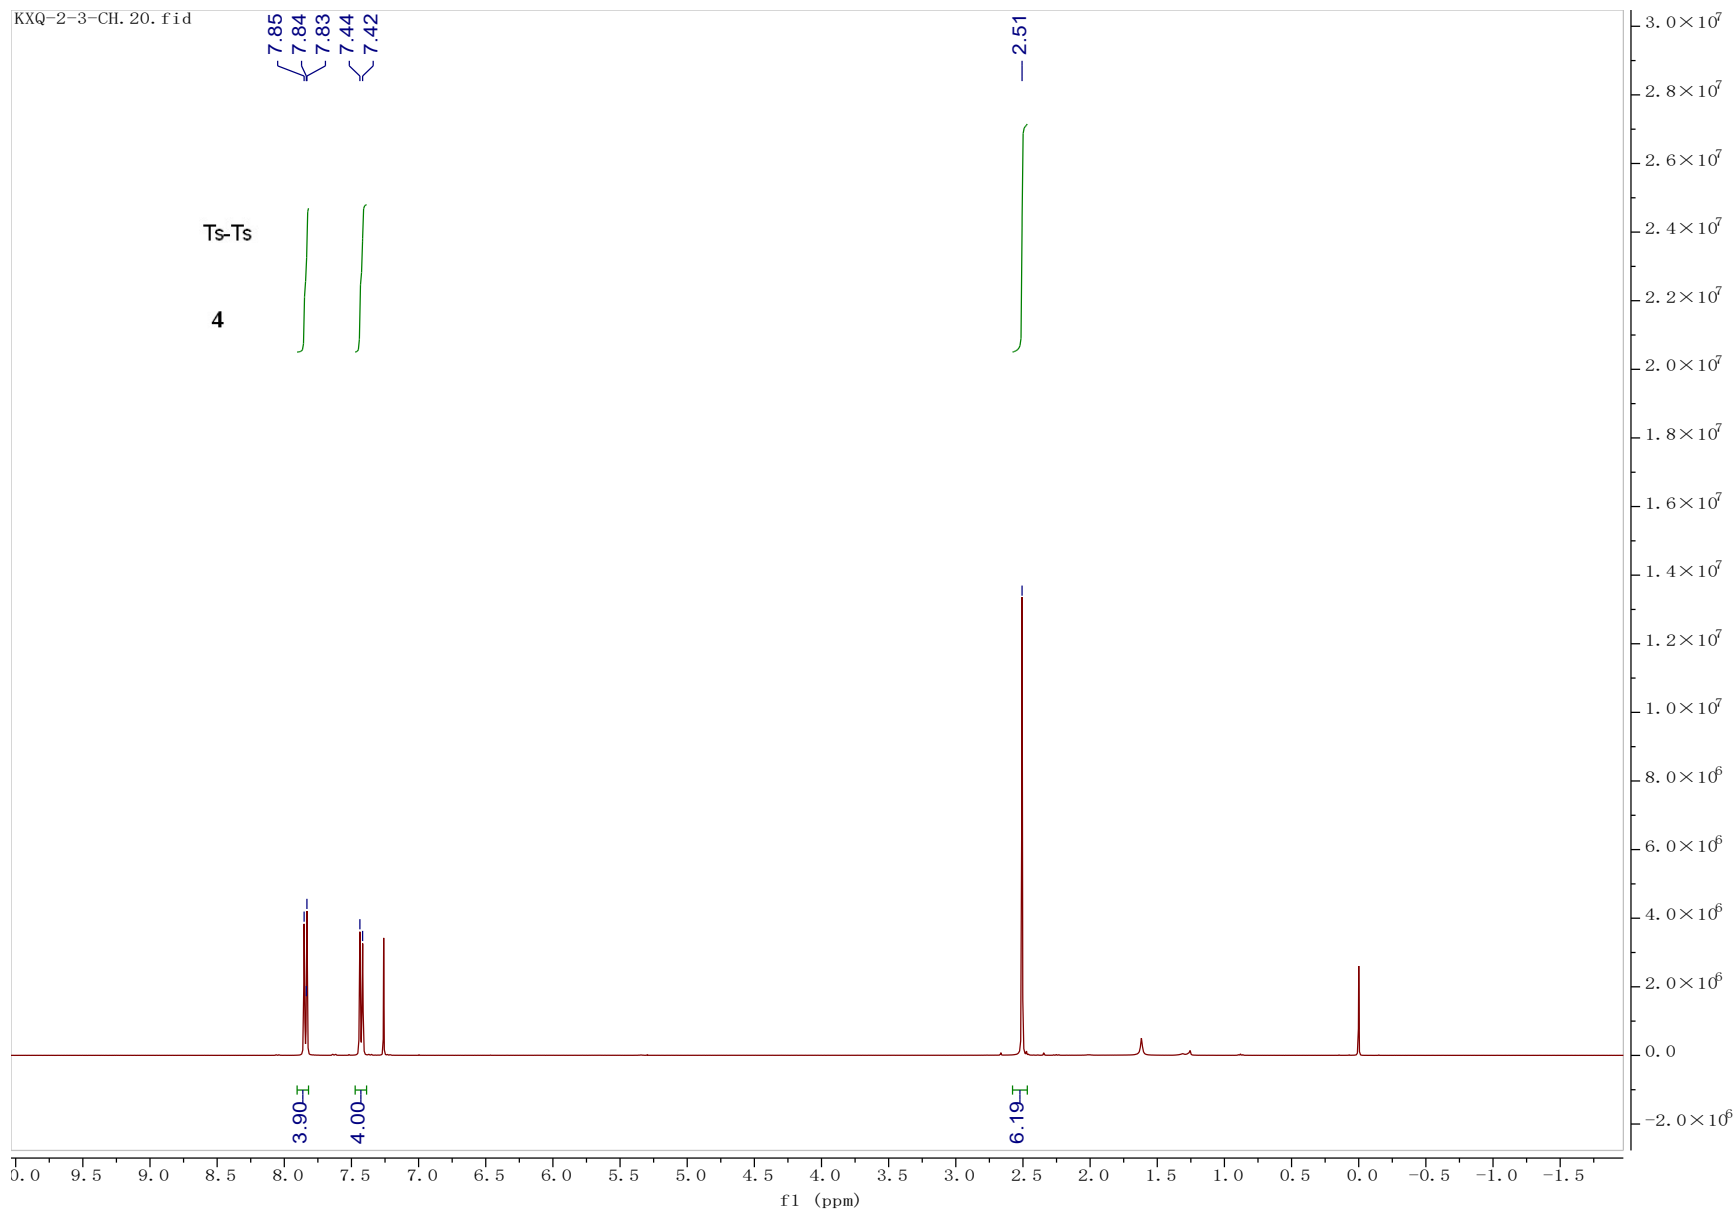

KXQ-2-3-CH. 21. fid

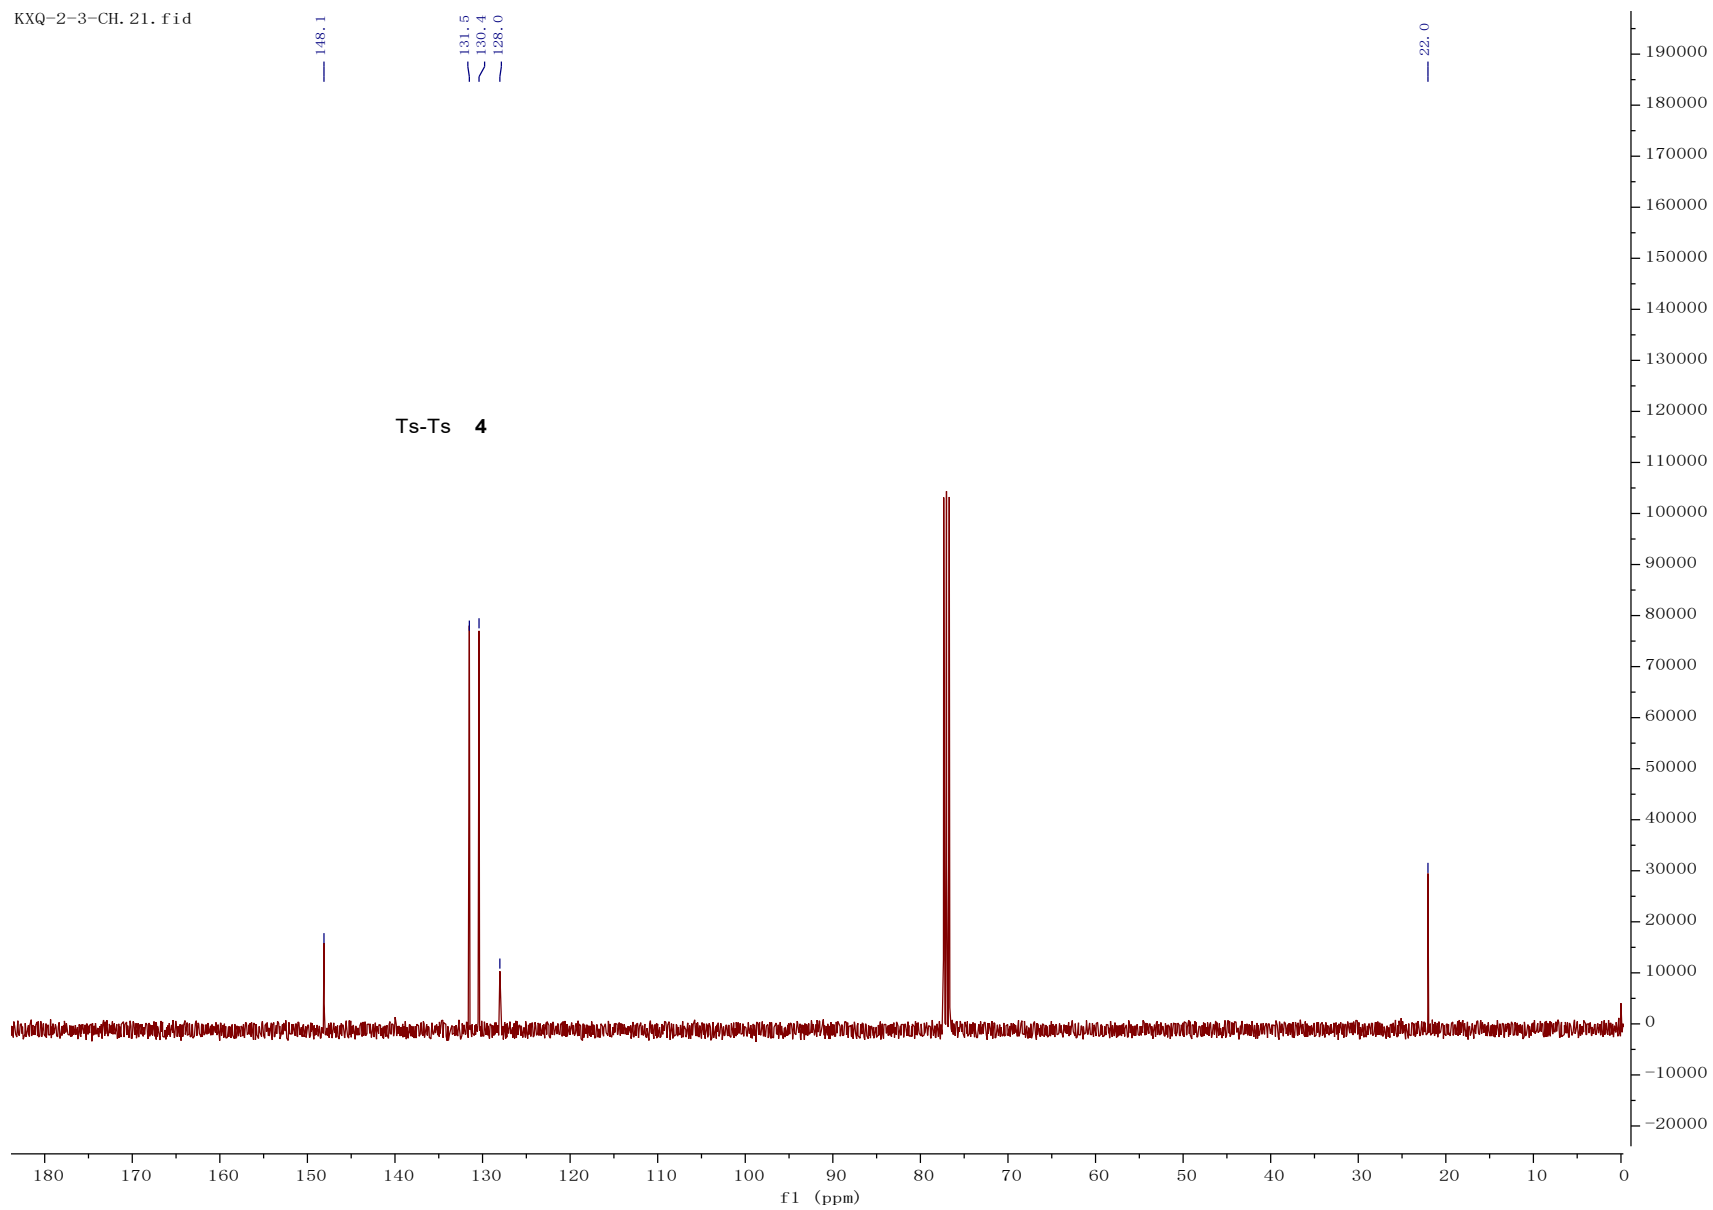

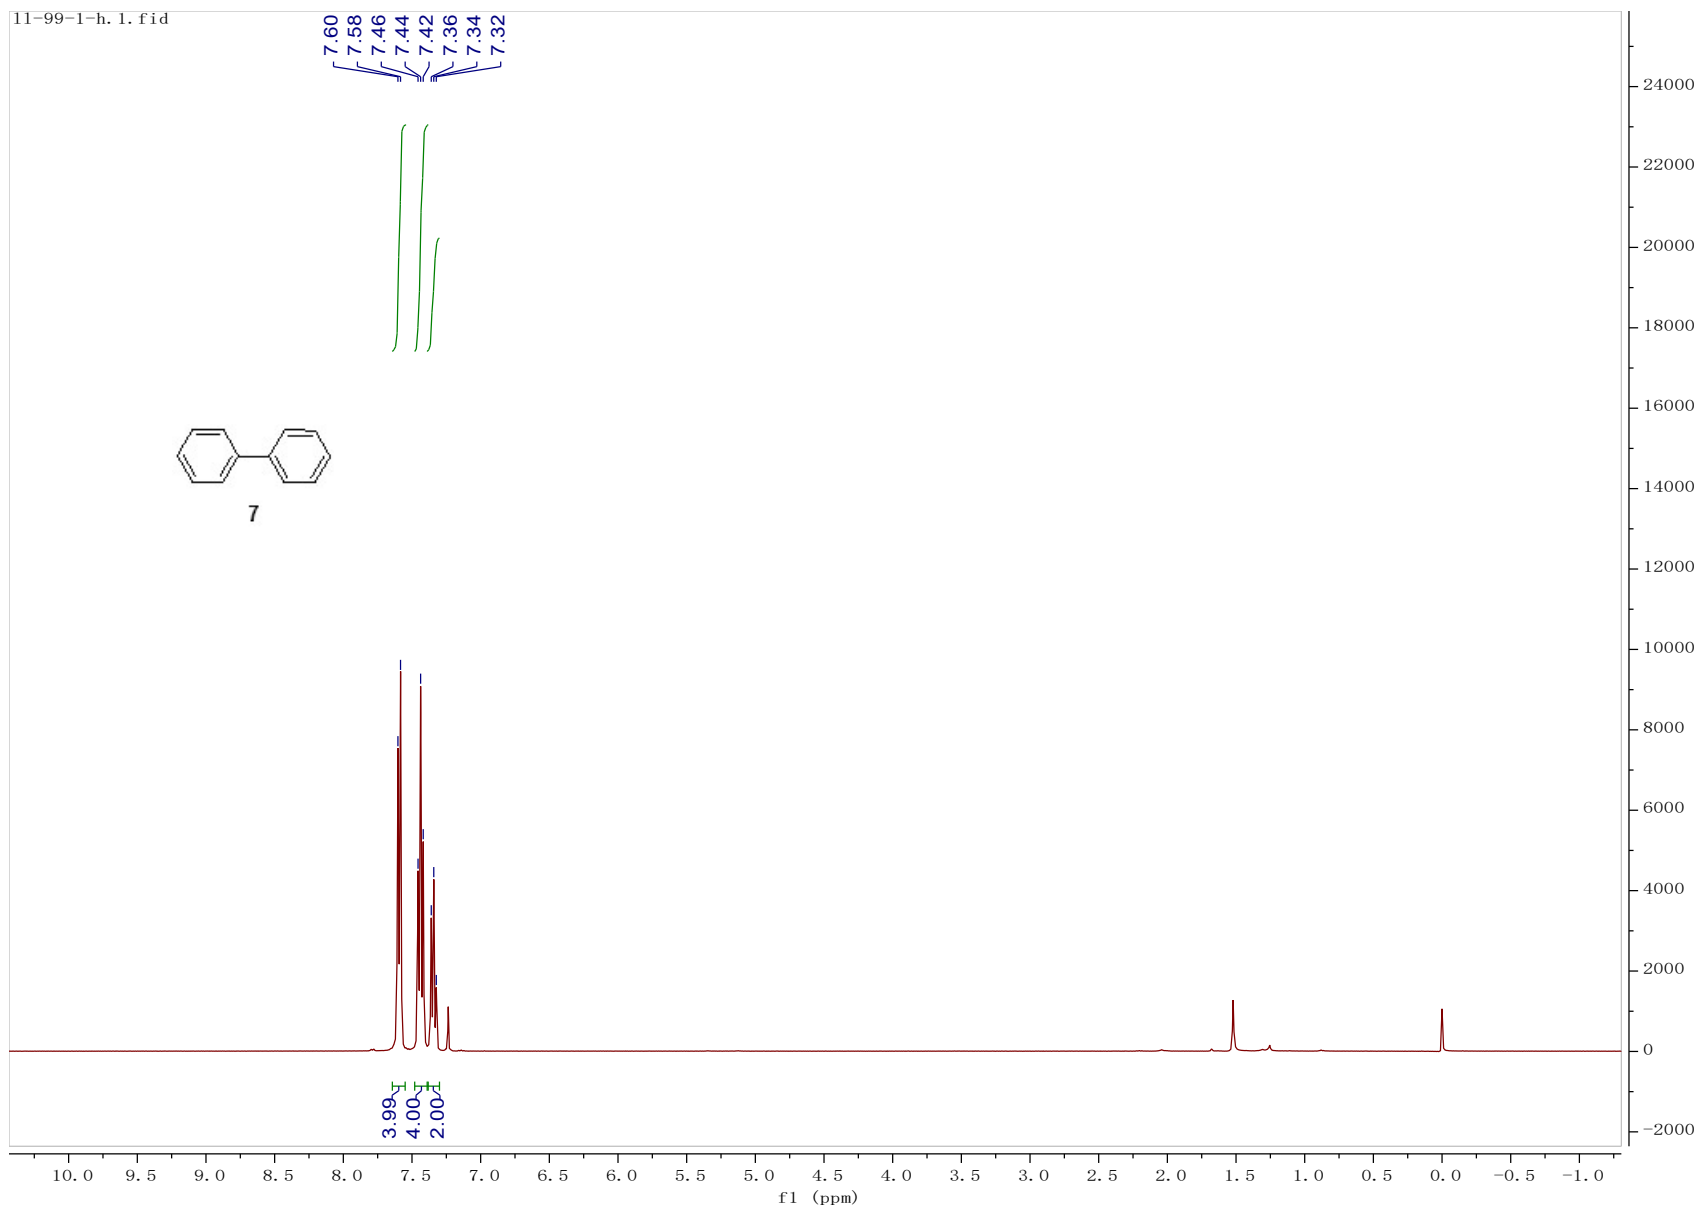



LYJ-1-1.3.fid

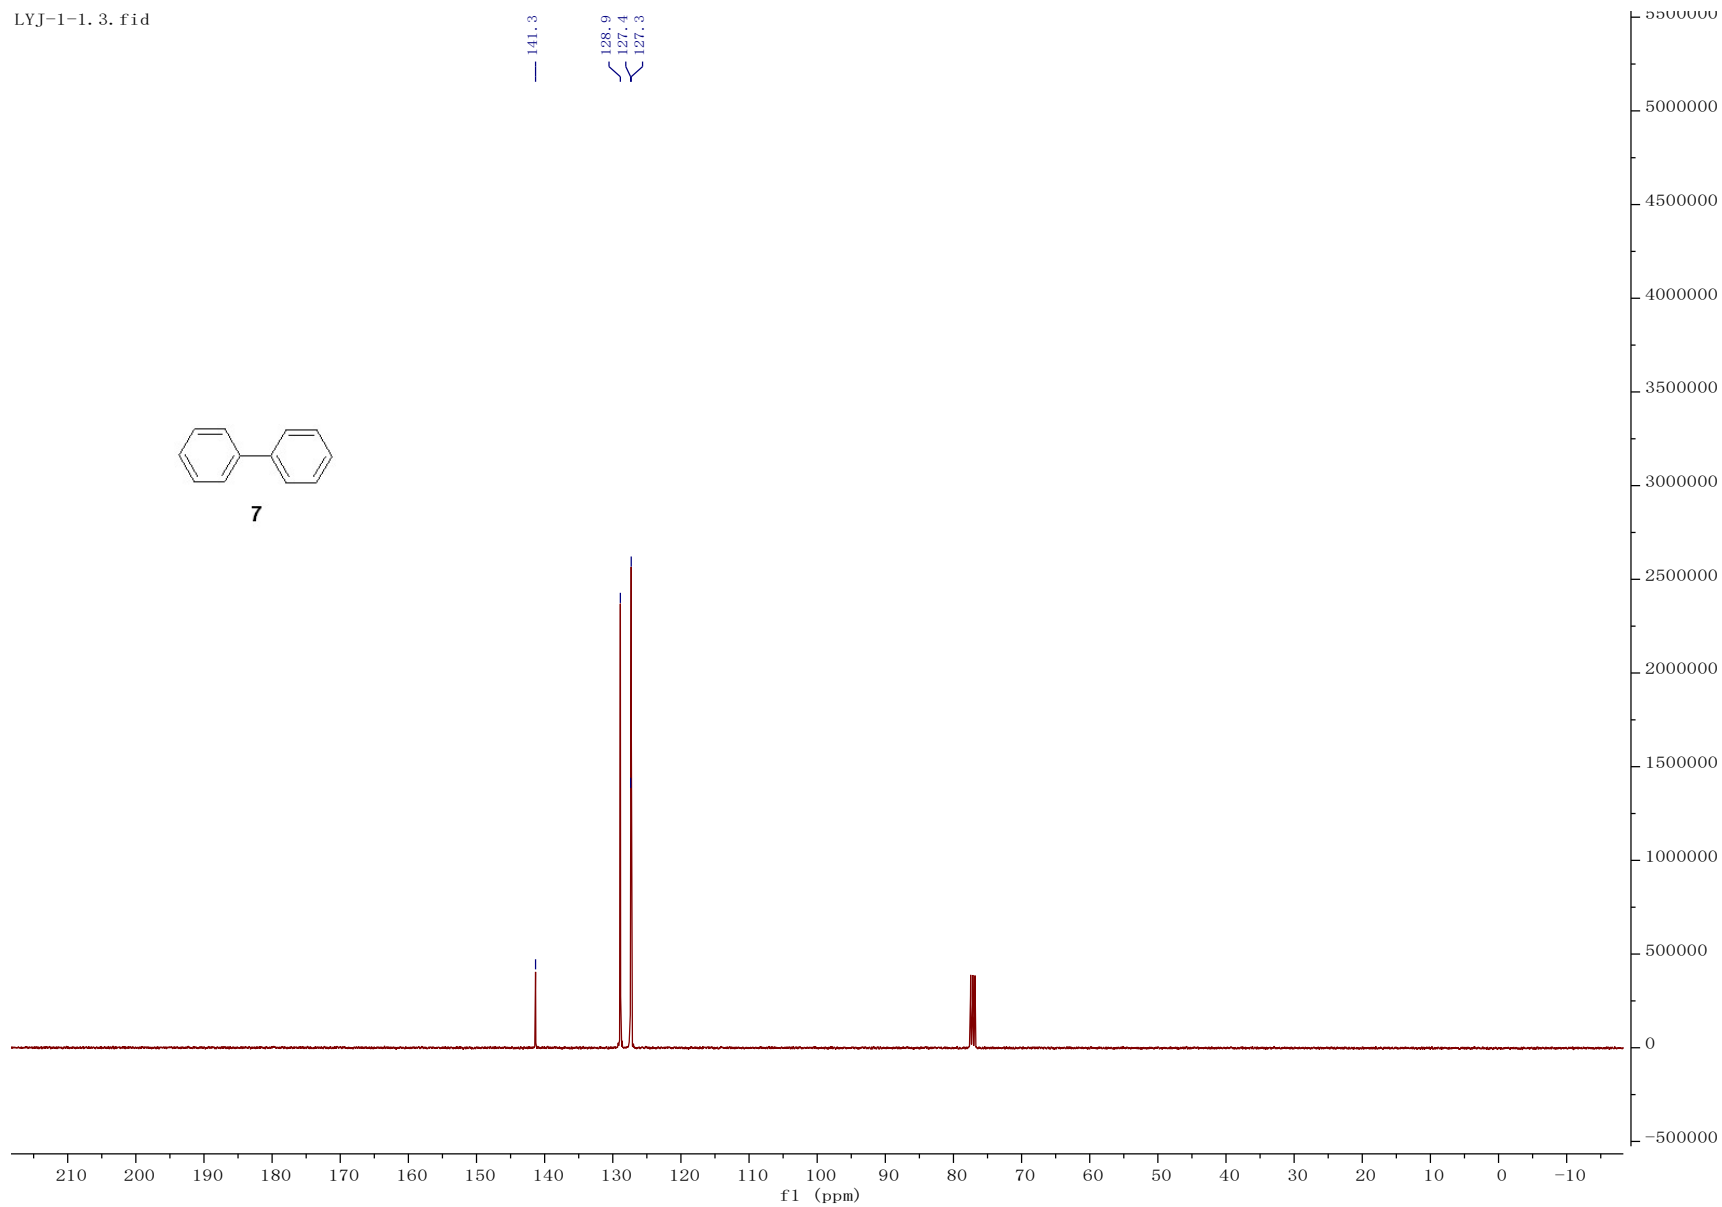

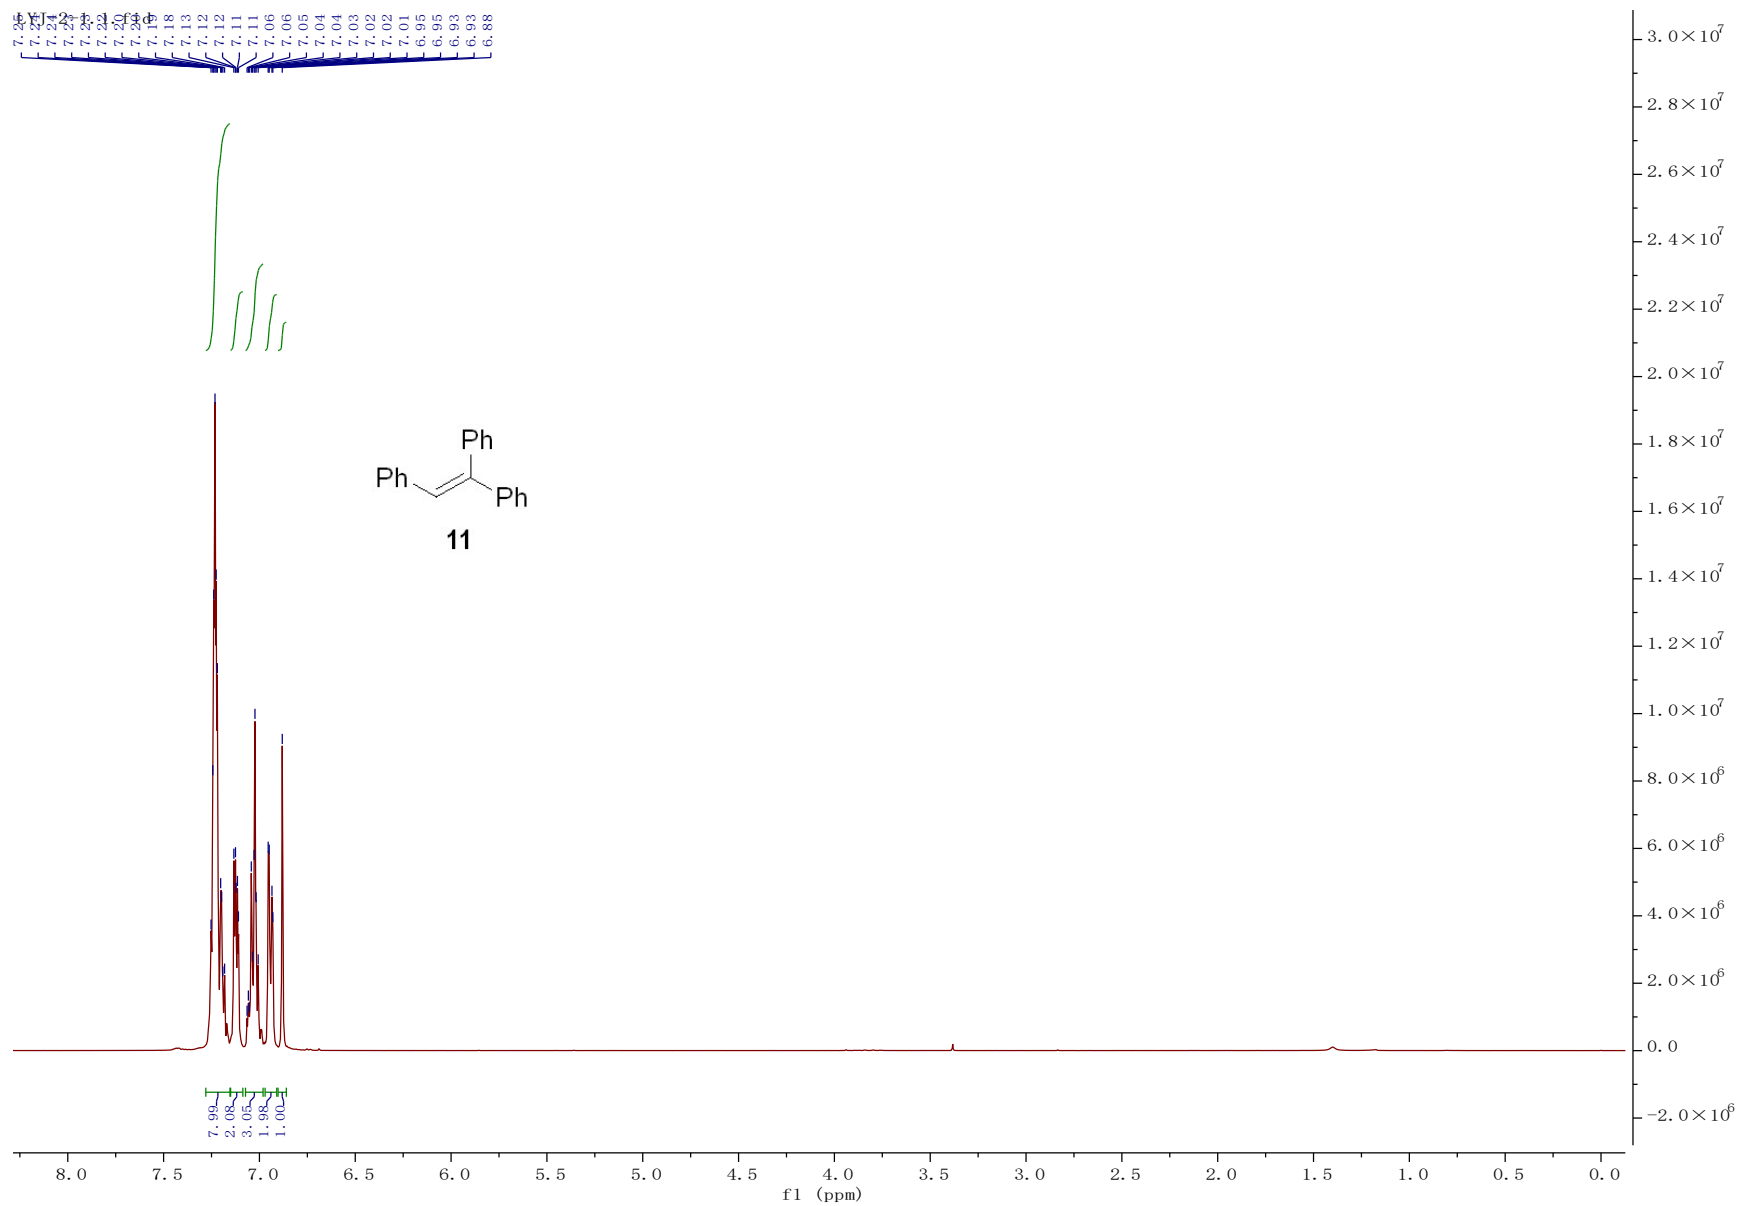

LYJ-2-1. 3. fid

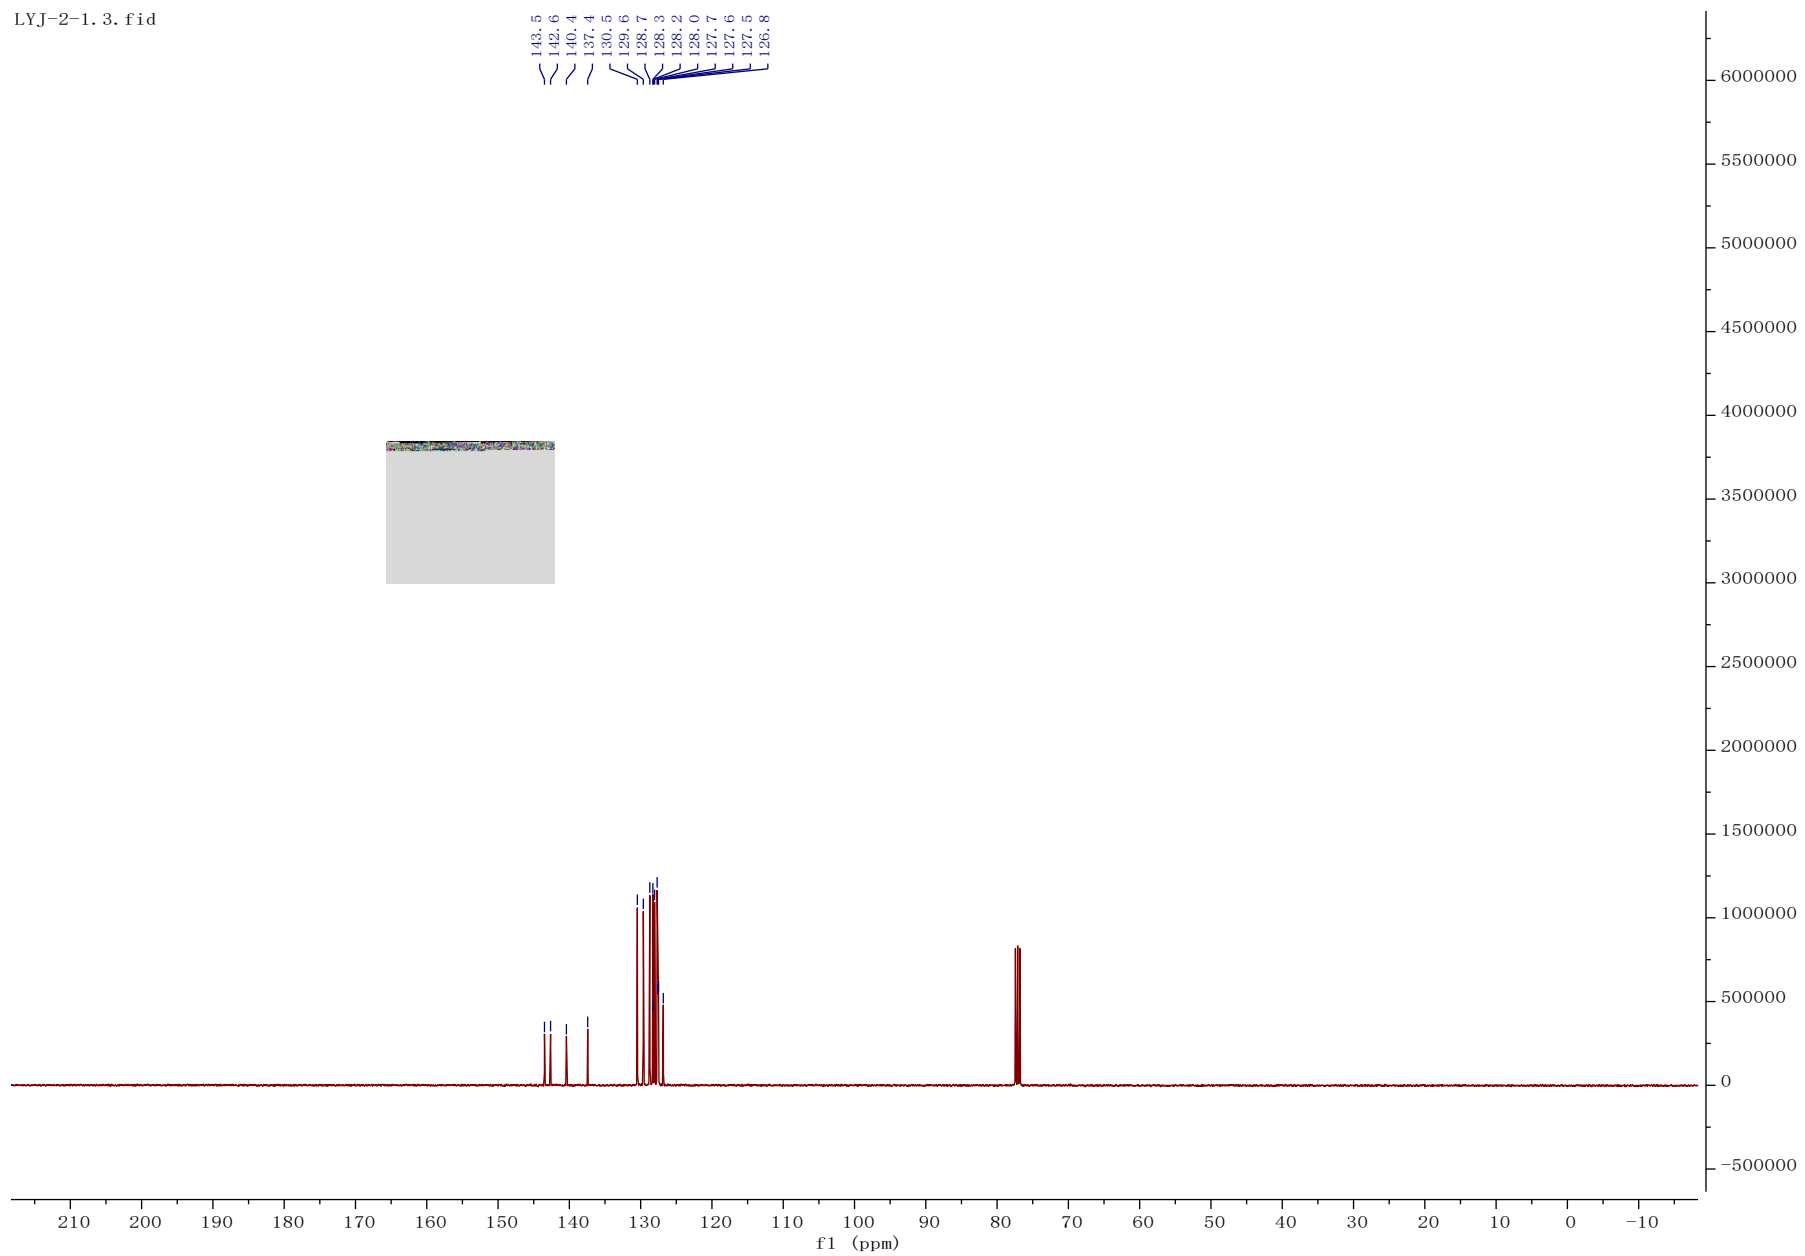

## 8. References

1. (a) Maity, P.; Shacklady-McAtee, D. M.; Yap, G. P. A.; Sirianni, E. R.; Watson, M. P. *J. Am. Chem. Soc.* **2013**, *135*, 280; (b) Shacklady-McAtee, D. M.; Roberts, K. M.; Basch, C. H.; Song, Y. G.; Watson, M. P. *Tetrahedron*. **2014**, *70*, 4257; (c) Zhang, Q.; Zhang, X. Q.; Wang, Z. X. *Dalton Trans.* **2012**, *41*, 10453; (d) Yang, X.; Wang, Z. X. *Organometallics* **2014**, *33*, 5863; (e) Zhang, X. Q.; Wang, Z. X. *Org. Biomol. Chem.* **2014**, *12*, 1448.
2. (a) Wang, Y.; Furukawa, S.; Zhang, Z.; Murciano, L. T.; Khan, S. A.; Yan, N. *Catal. Sci. Technol.*, **2019**, *9*, 86; (b) Wang, Z.; Wang, X.; Ura, Y.; Nishihara, Y. *Org. Lett.* **2019**, *21*, 6779; (c) Ping, Y. Y.; Ding, Q. P.; Peng, Y. Y. *ACS Catal.* **2016**, *6*, 5989; (d) Mondal, B.; Acharyya, K.; Howlader, P.; Mukherjee, P. S. *J. Am. Chem. Soc.* **2016**, *138*, 1709; (e) Yang, L.; Liu, Y.-T.; Park, Y.; Park, S.-W.; Chang, S. *ACS Catal.* **2019**, *9*, 3360; (f) Shang, R.; Ji, D.-S.; Chu, L.; Fu, Y.; Liu, L. *Angew. Chem., Int. Ed.* **2011**, *50*, 4470; (g) Yoshida, H.; Fujimura, Y.; Yuzawa, H.; Kumagai, J.; Yoshida, T. *Chem. Commun.* **2013**, *49*, 3793; (h) Huang, Y.; Yu, Y.; Zhu, Z.; Zhu, C.; Cen, J.; Li, X.; Wu, W.; Jiang, H. *J. Org. Chem.* **2017**, *82*, 7621.
3. Delcaillau, T.; Boehm, P.; Morandi, B. *J. Am. Chem. Soc.* **2021**, *143*, 3723.
4. Murugesan, K.; Donabauer, K.; König, B. *Angew. Chem., Int. Ed.* **2021**, *60*, 2439.
